# Supplementary material for: RNA-seq reveals more consistent reference genes for gene expression studies in human non-melanoma skin cancers
Source: PeerJ journal article supplement (doi:10.7717/peerj.3631), 2017-08-21
Supplement: Supplementary_Figure_2.pdf [file Supplementary_Figure_2.pdf]

## Supplmentary Figure 1

### Skin Reference Genes

Based on the study : *Reference genes for non-melanoma skin cancer study*

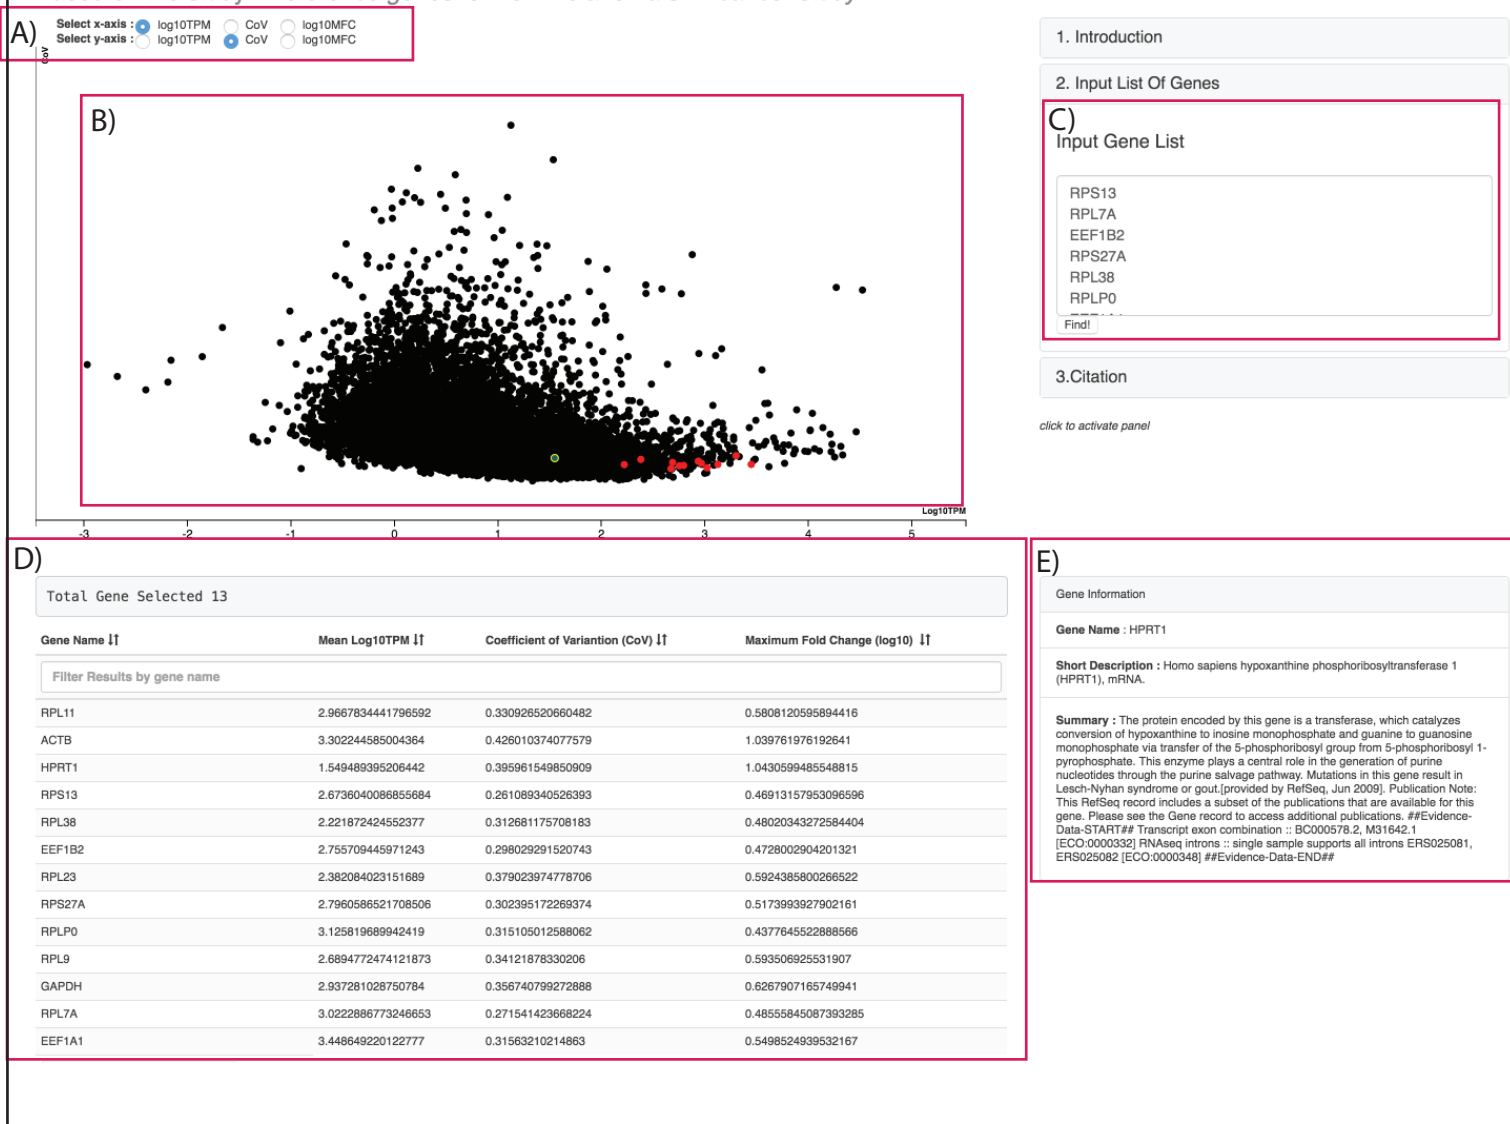

### Supplementary Figure 1 - Screenshot of the online resource of reference genes for non-melanoma skin cancers.

**A)** Radio buttons for users to toggle value type to be plotted on the x and y-axis. Users can choose between plotting log10 Maximum Fold Change (log10MFC), log10 Transcript Per Million (log10TPM) and Coefficient of Variation (CoV) **B)** Scatterplot showing data points derived from each measured transcript. Only genes with TPM > 0 for all samples are shown. Red dots represents genes selected either by user selection of points on the chart or are present in the user input (C). Green dots represent the gene with information displayed in (E) and is selected by clicking on the row in (D). **C)** Input box for users to search for genes in the datasets. **D)** Table showing metrics of selected genes (coloured dots) in scatterplot **E)** Gene information of specific gene in the scatterplot (Green dots).
