# Supplementary material for: RNA-seq reveals more consistent reference genes for gene expression studies in human non-melanoma skin cancers
Source: PeerJ journal article supplement (doi:10.7717/peerj.3631), 2017-08-21
Supplement: Supplementary_Figure__1.pdf [file Supplementary_Figure__1.pdf]

**Supplementary Figure 1 - Distribution plots of various metrics**

**A) Distribution of CoV against log2 max:min ratio  
( Transcript Per Million )**

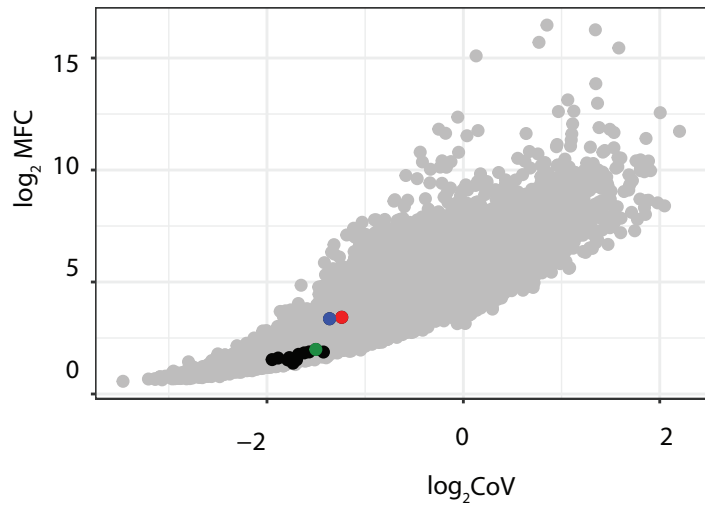

**B) Biological Coefficient of Variation (BcV)  
against Average CPM**

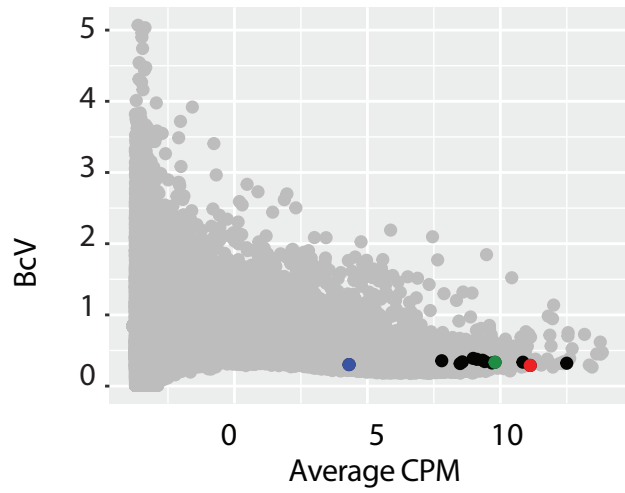

**C) Distribution of MFC (TPM)**

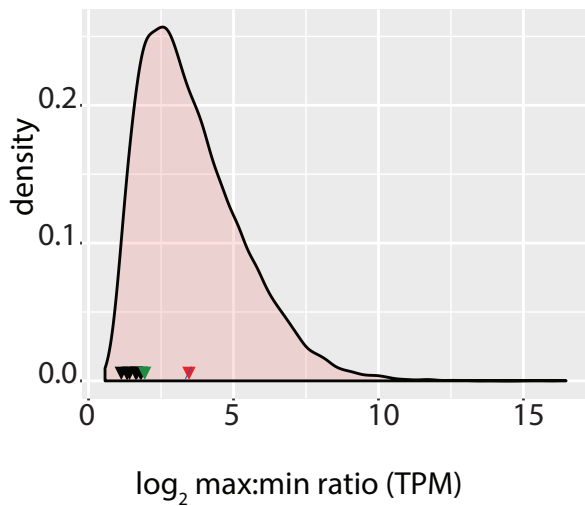

**D) Distributio of CoV Value (TPM)**

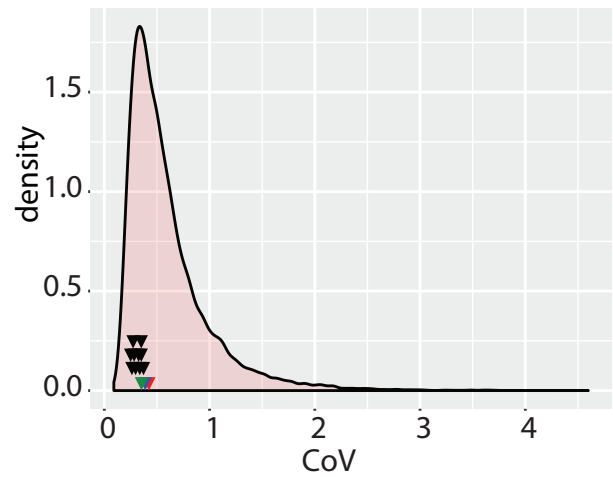

**E) Distribution of log10 mean TPM**

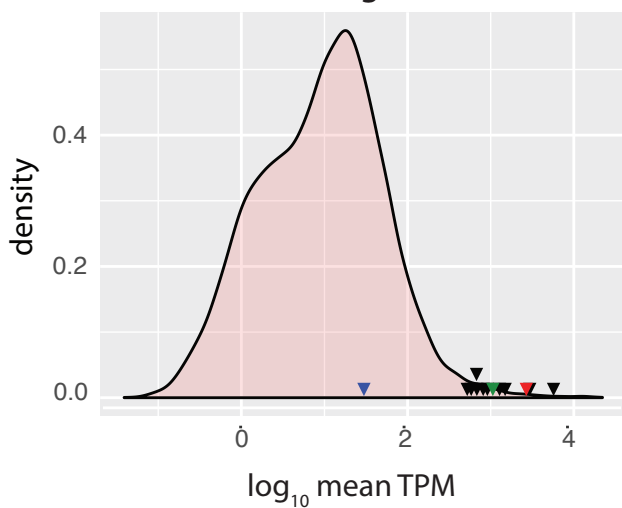

● GAPDH ● ACTB ● HPRT1  
● Validated Genes
