# Supplementary material for: RNA-seq reveals more consistent reference genes for gene expression studies in human non-melanoma skin cancers
Source: PeerJ. 2017 Aug 21;5:e3631. doi: 10.7717/peerj.3631 (PMC5572537; doi:10.7717/peerj.3631)
Supplement: Table S1 — A total of 13 actinic keratosis (AK), 7 intraepidermal carcinoma (IEC), 5 squamous cell carcinoma (SCC) 4 non-photo damaged skin samples (NORM) samples. Counts measured are based on GENCODE Gene annotation version 19. [file peerj-05-3631-s003.xlsx]

## Sheet: Sheet1
Supplementary Table 1 P Counts used in this study
	ENSG	AK_17	AK_21	IEC_22	AK_23	AK_24	SCC_1	AK_2	AK_3	AK_4	IEC_5	IEC_6	IEC_8	IEC_9	IEC_19	IEC_20	NORM_1	NORM_2	NORM_3	NORM_4	AK_25	AK_7	AK_10	SCC_11	SCC_12	SCC_13	AK_14	AK_15	SCC_16	AK_18	hgnc
1	ENSG00000000003	525	935	680	337	737	481	324	846	514	510	692	477	449	521	393	566	230	352	324	403	625	530	683	877	996	802	1882	435	615	TSPAN6
2	ENSG00000000005	0	4	7	0	10	3	2	5	0	2	8	6	0	2	2	96	43	72	69	1	4	1	8	19	10	2	6	0	20	TNMD
3	ENSG00000000419	1264	730	1499	828	1304	782	623	982	1038	1320	1139	893	1367	1231	1211	711	325	573	594	1344	1501	1271	1802	1140	1589	1354	1406	1307	1005	DPM1
4	ENSG00000000457	363	531	588	297	640	356	239	454	464	499	396	221	329	587	513	632	337	458	473	523	375	139	431	422	511	425	685	357	276	SCYL3
5	ENSG00000000460	244	487	346	167	612	227	173	317	355	391	222	238	209	394	317	412	205	344	322	351	103	118	237	187	294	283	231	363	186	C1orf112
6	ENSG00000000938	152	146	476	254	202	307	175	204	347	1305	352	271	190	264	576	68	77	44	79	108	115	447	410	345	270	163	563	327	326	FGR
7	ENSG00000000971	757	2002	3895	2708	1967	2253	2483	1653	970	4907	2995	1012	674	715	2693	9974	11035	10318	11528	1075	472	495	1170	3894	3358	379	2488	1711	3866	CFH
8	ENSG00000001036	696	240	1079	561	677	437	278	536	542	965	718	664	614	321	820	401	248	319	346	636	458	481	570	569	648	537	387	554	636	FUCA2
9	ENSG00000001084	1001	1196	2869	1475	3732	1135	923	1705	1386	1780	1740	1320	1602	1715	1428	1183	501	851	1091	2722	1838	663	1541	1751	1934	2530	2084	1532	1862	GCLC
10	ENSG00000001167	653	1188	1319	634	1266	799	577	1195	1239	1196	776	509	798	1617	1068	473	261	405	475	1243	602	615	778	761	1262	1225	1342	1007	767	NFYA
11	ENSG00000001460	352	327	511	225	553	216	135	288	309	443	272	224	401	355	437	148	178	148	178	325	282	279	400	281	414	274	276	302	284	STPG1
12	ENSG00000001461	658	883	1531	779	2385	740	650	1030	925	1089	987	576	736	1282	1575	1285	1041	1050	1189	1104	670	445	1086	1039	1219	792	925	1310	1163	NIPAL3
13	ENSG00000001497	1259	1007	1873	897	1832	967	759	1282	1433	1960	1259	1058	836	1324	1669	561	439	517	487	1789	974	807	828	1034	1480	1062	1520	1273	1125	LAS1L
14	ENSG00000001561	38	90	279	171	221	103	78	141	39	359	144	228	32	94	210	535	215	378	400	36	36	72	169	342	263	21	247	200	221	ENPP4
15	ENSG00000001617	4712	2694	4534	2286	6470	2843	2369	4654	4885	4758	5612	1495	2515	4106	4018	868	526	566	620	4196	2322	1244	1921	1889	3128	1619	3673	2984	3071	SEMA3F
16	ENSG00000001626	16	16	88	20	52	36	16	11	11	12	12	29	4	25	43	262	476	429	731	20	54	2	10	34	37	30	52	24	136	CFTR
17	ENSG00000001629	1849	1981	3294	1760	2607	1467	1476	1924	2013	2014	1930	2074	1499	2424	2329	2822	1368	2280	2602	2232	1706	645	1654	1857	2895	2418	2068	2227	2163	ANKIB1
18	ENSG00000001630	123	75	119	61	137	73	37	128	131	108	114	54	83	68	85	52	18	26	30	142	94	79	37	104	141	141	542	126	84	CYP51A1
19	ENSG00000001631	937	1091	1530	844	1207	1014	855	1245	1131	1300	900	904	813	1431	1437	1923	888	1615	1915	1532	953	332	1156	1051	1153	1192	1035	1216	804	KRIT1
20	ENSG00000002016	82	265	194	104	283	321	224	476	361	345	214	153	211	291	280	352	290	368	455	324	108	80	224	191	262	204	255	185	138	RAD52
21	ENSG00000002079	13	3	12	6	11	6	8	17	8	28	17	20	1	10	30	14	14	22	29	19	7	2	7	9	19	8	23	6	8	MYH16
22	ENSG00000002330	233	154	215	163	249	101	99	130	145	211	215	227	157	198	198	63	55	46	55	179	205	237	300	194	197	140	222	165	178	BAD
23	ENSG00000002549	2386	1448	3748	2002	3402	1980	1651	2272	2049	7237	2505	3518	2072	2744	5103	1367	713	991	1098	2595	1406	2421	3903	3777	2643	1484	3363	3001	2717	LAP3
24	ENSG00000002586	0	0	0	0	0	1	0	0	0	0	0	0	0	0	0	0	0	0	0	0	0	0	0	0	0	0	0	0	0	CD99
25	ENSG00000002587	419	379	179	124	86	94	38	118	186	164	97	31	110	86	110	20	11	32	73	250	97	252	373	130	92	65	78	155	213	HS3ST1
26	ENSG00000002726	15	24	228	89	79	129	47	105	76	252	19	34	47	63	323	18	33	23	21	30	28	101	122	171	46	10	64	157	57	ABP1
27	ENSG00000002745	246	207	724	550	1073	640	600	502	638	751	315	139	128	635	738	725	259	399	724	134	312	209	254	378	1081	1028	890	405	470	WNT16
28	ENSG00000002746	31	26	70	27	25	13	17	63	7	13	71	16	34	6	17	31	19	15	33	40	19	9	15	18	46	71	25	20	30	HECW1
29	ENSG00000002822	623	431	823	430	1043	440	323	637	632	1403	739	701	421	596	873	355	208	234	261	796	311	370	412	648	614	493	534	519	592	MAD1L1
30	ENSG00000002834	3878	4075	6894	3770	4078	2579	1929	3191	3939	6182	4619	1966	3735	2098	4104	747	604	752	859	2608	2125	2581	2655	3319	3057	3641	3493	3788	3522	LASP1
31	ENSG00000002919	897	634	1228	576	895	576	391	699	921	1116	800	411	772	698	921	263	186	234	219	793	717	796	966	915	1022	755	1095	929	673	SNX11
32	ENSG00000002933	190	289	1002	584	247	398	219	191	291	1373	576	435	277	227	692	92	83	60	72	89	34	1503	926	827	362	116	271	359	515	TMEM176A
33	ENSG00000003056	1738	1256	3095	1537	2005	1498	1130	1805	2216	3301	1712	1473	1654	1699	2708	1026	769	798	938	2052	1613	1564	2200	2078	1792	1847	2296	2094	1581	M6PR
34	ENSG00000003096	86	93	80	47	151	61	62	83	61	50	59	84	76	69	128	132	71	104	128	33	96	59	73	115	175	276	148	52	77	KLHL13
35	ENSG00000003137	1938	4349	2283	1668	1008	1136	776	1416	1117	4229	5866	535	773	668	2029	278	411	251	214	3003	3151	603	329	660	3342	1944	1590	1815	2822	CYP26B1
36	ENSG00000003147	314	243	526	288	519	367	234	447	438	391	252	447	206	389	401	369	304	348	467	372	296	145	865	438	388	112	357	280	250	ICA1
37	ENSG00000003249	766	437	162	174	446	171	142	365	361	444	171	204	429	118	195	45	20	14	29	270	126	339	122	410	246	209	516	239	314	DBNDD1
38	ENSG00000003393	934	1252	1314	716	1302	836	685	1134	1249	942	1005	647	705	1443	1298	1412	1024	1334	1333	1313	1099	402	577	918	1526	1069	1298	1150	1122	ALS2
39	ENSG00000003400	650	371	732	465	777	838	562	920	1053	1049	815	648	860	427	1476	527	349	426	502	899	395	347	1128	735	612	500	497	589	642	CASP10
40	ENSG00000003402	1767	991	2354	1210	1724	1414	993	1472	2188	2941	2469	998	1621	1223	2416	2143	1654	1749	2398	2126	1623	1321	1959	2222	2437	1661	3981	2150	1889	CFLAR
41	ENSG00000003436	339	276	743	433	498	483	319	344	315	563	447	253	191	192	364	1247	853	1366	1339	206	115	295	524	524	329	191	389	420	765	TFPI
42	ENSG00000003509	283	248	321	189	349	273	216	326	291	388	260	214	321	342	361	459	293	457	486	416	259	160	412	336	357	308	372	242	249	NDUFAF7
43	ENSG00000003756	2744	3748	4241	2441	5493	3379	2941	4361	4105	4267	3992	1775	1995	3826	5143	3513	2211	3063	3911	5160	3464	590	2412	2449	3287	1976	3144	2570	2861	RBM5
44	ENSG00000003987	63	289	122	46	68	70	56	82	62	96	76	56	41	104	98	348	73	332	352	93	72	24	86	77	114	76	124	58	112	MTMR7
45	ENSG00000003989	181	4048	1168	707	810	908	787	822	993	702	1027	495	122	498	634	1336	592	930	1597	422	322	971	363	790	1009	473	2724	537	1946	SLC7A2
46	ENSG00000004059	3700	2185	4162	2247	3082	1794	1511	2342	2867	3432	2843	2185	2378	2954	2722	764	521	529	588	2736	3064	4473	3422	3180	3580	3112	4489	2645	2620	ARF5
47	ENSG00000004139	34	215	87	40	113	58	41	95	96	122	72	101	43	64	100	54	53	60	57	61	21	22	67	107	76	22	84	62	83	SARM1
48	ENSG00000004142	4861	2458	5521	2764	3756	2445	1558	3502	4412	4526	4050	2365	3874	2864	3620	752	494	607	569	4092	3105	4258	4105	3309	4738	3560	5510	3469	3051	POLDIP2
49	ENSG00000004399	1968	1315	3949	2400	2150	2248	1450	1599	2369	5617	3269	2567	1045	1513	4007	577	507	484	544	1440	447	803	1064	2036	2108	1235	1853	2114	3425	PLXND1
50	ENSG00000004455	4370	2571	4286	2339	8224	3090	2264	4050	4612	6576	3380	3901	3624	4952	5576	1901	1243	1661	1751	4935	3471	3762	5166	3384	4649	3944	5453	3876	3300	AK2
51	ENSG00000004468	16	8	88	31	402	102	121	20	24	70	139	65	60	42	147	9	8	2	13	15	17	64	44	401	27	212	30	308	7	CD38
52	ENSG00000004478	2654	1540	3083	1566	3098	1849	1573	3796	4229	4693	2204	1063	3087	4096	3405	968	683	705	811	2997	1825	1661	1771	1551	2751	2945	5528	2259	1806	FKBP4
53	ENSG00000004487	2651	3182	3552	1862	4177	1990	1521	2797	2940	3751	2993	2155	2140	2578	3205	1779	1198	1408	1692	3063	1844	1530	1760	2278	3268	2728	3525	2421	2166	KDM1A
54	ENSG00000004534	1902	2430	3197	1525	3479	3203	2662	3899	3504	4154	3406	2001	2343	3501	5106	2997	1844	2058	2965	3366	2995	512	2090	2059	1984	1245	1729	2150	1743	RBM6
55	ENSG00000004660	986	980	1164	500	1191	506	435	912	831	881	1648	668	341	942	831	308	274	346	342	933	882	165	230	455	741	625	1032	912	960	CAMKK1
56	ENSG00000004700	991	821	1744	878	851	664	588	838	880	1576	883	618	538	759	1064	1103	547	865	971	1105	674	456	765	928	1170	907	710	1181	996	RECQL
57	ENSG00000004766	802	753	1274	621	991	736	569	910	833	1025	693	847	836	1231	1016	1503	731	1234	1407	994	602	411	684	784	982	864	903	1004	688	CCDC132
58	ENSG00000004776	24	8	39	19	80	11	9	12	10	46	45	29	0	4	34	0	2	1	3	7	5	9	23	16	21	5	18	5	48	HSPB6
59	ENSG00000004777	226	394	298	73	482	343	373	626	384	971	759	928	165	2175	916	55	33	45	39	644	279	23	138	227	265	154	177	252	225	ARHGAP33
60	ENSG00000004779	1033	656	1225	627	1258	709	547	1036	1092	1354	1074	869	886	1345	954	462	242	288	292	1109	1073	1677	1964	1130	1326	981	2424	996	932	NDUFAB1
61	ENSG00000004799	36	177	250	169	341	132	93	125	65	412	183	105	85	49	83	468	2131	951	1931	66	62	100	149	388	360	63	907	72	329	PDK4
62	ENSG00000004809	1	10	11	5	4	5	0	2	5	2	3	3	3	1	6	4	3	3	10	1	0	3	3	1	5	13	6	3	13	SLC22A16
63	ENSG00000004838	23	40	29	9	29	28	18	26	47	51	37	39	12	24	28	28	20	37	22	28	16	6	19	19	20	16	42	19	14	ZMYND10
64	ENSG00000004846	1	7	35	16	151	0	1	8	0	8	36	7	25	28	6	62	22	10	40	56	3	0	3	21	8	20	4	64	20	ABCB5
65	ENSG00000004848	0	0	1	1	6	0	2	1	0	20	0	4	3	0	4	0	1	0	0	0	1	2	0	2	4	1	3	0	2	ARX
66	ENSG00000004864	1453	647	1453	770	1157	896	712	1349	1341	1497	1234	1117	946	1127	1316	733	488	633	740	1603	1039	789	825	873	1189	1052	1928	1307	1015	SLC25A13
67	ENSG00000004866	440	394	810	419	714	299	250	480	382	639	542	537	403	485	694	424	269	296	342	499	369	305	431	519	539	408	510	407	444	ST7
68	ENSG00000004897	1944	1944	3363	1779	2765	1623	1105	2239	2275	2230	2153	1158	1410	1653	2178	2041	996	1713	2000	2085	1524	1182	1939	1934	2569	2019	2800	2288	2227	CDC27
69	ENSG00000004939	1	2	0	0	0	4	0	0	5	3	3	5	1	659	4	7	2	3	3	0	0	0	1	2	2	1	1	5	1	SLC4A1
70	ENSG00000004948	0	0	9	4	0	3	4	2	2	6	2	4	2	2	5	5	8	8	10	1	3	5	6	11	2	0	1	3	4	CALCR
71	ENSG00000004961	944	429	1130	593	765	603	524	738	904	1029	750	442	882	880	995	369	197	279	303	925	778	888	1055	821	1039	778	1279	890	836	HCCS
72	ENSG00000004975	1016	1034	1534	841	1734	905	667	1203	1359	1234	1880	1062	728	1134	1391	330	262	327	294	1491	1056	552	819	1160	1546	771	1449	1126	894	DVL2
73	ENSG00000005001	1590	1519	329	207	472	537	229	495	713	1702	2026	409	1097	1231	888	84	26	18	45	316	1472	1538	973	968	1515	2561	2642	398	406	PRSS22
74	ENSG00000005007	3094	3169	5445	2640	6986	3461	2087	5286	5511	7373	5441	2559	2524	5634	5636	634	591	592	575	4712	2522	1274	1420	2769	3822	4718	6087	4297	3242	UPF1
75	ENSG00000005020	665	430	1279	665	975	588	494	625	843	1395	540	457	504	627	921	746	271	466	780	738	550	505	577	454	618	412	263	793	775	SKAP2
76	ENSG00000005022	8801	5346	12618	5724	9659	6692	5079	9043	10205	10658	8178	9887	6781	10238	9979	2998	1516	1919	1836	10159	6473	11733	10175	9933	12592	9202	24760	8996	8118	SLC25A5
77	ENSG00000005059	1404	327	1094	630	1716	543	335	638	806	1603	752	915	596	1154	1178	539	308	469	533	713	625	1613	1312	1158	705	510	838	880	552	CCDC109B
78	ENSG00000005073	9	5	87	38	45	13	4	2	10	28	30	33	33	35	56	18	14	13	11	20	31	4	1	3	8	37	8	24	19	HOXA11
79	ENSG00000005075	865	444	960	454	903	359	279	481	508	744	671	733	618	852	651	156	129	113	105	688	716	1135	1358	849	868	879	891	648	547	POLR2J
80	ENSG00000005100	1299	1029	1668	852	1936	1138	834	1466	1819	1405	1534	971	619	925	1339	304	211	331	419	1548	1245	361	579	948	1619	1135	1490	1225	1148	DHX33
81	ENSG00000005102	148	490	426	267	122	246	183	125	142	379	160	83	73	113	336	183	144	148	167	97	76	193	198	254	156	30	165	175	357	MEOX1
82	ENSG00000005108	55	37	171	104	67	52	26	27	59	52	60	28	19	21	62	328	186	314	267	44	34	15	29	30	105	25	82	102	186	THSD7A
83	ENSG00000005156	885	1128	1153	617	1229	586	396	735	1071	1051	992	638	627	823	1014	754	571	680	846	1169	801	388	492	727	1093	782	1001	1003	856	LIG3
84	ENSG00000005175	739	581	1121	544	930	676	382	790	725	745	627	768	544	780	956	706	336	575	605	739	523	436	606	712	921	764	917	707	644	RPAP3
85	ENSG00000005187	17	59	51	35	61	141	78	310	34	45	37	50	18	43	48	152	30	97	114	38	31	44	177	503	498	45	1186	27	64	ACSM3
86	ENSG00000005189	130	86	152	85	241	93	84	117	145	218	129	139	75	231	111	133	81	94	131	255	93	38	182	175	147	97	158	104	88	AC004381.6
87	ENSG00000005194	2118	996	2577	1287	1689	1214	813	1547	1859	1940	1104	969	1302	1453	1651	601	410	465	451	1971	1305	1661	1487	1526	1740	1058	2388	1632	1389	CIAPIN1
88	ENSG00000005206	1540	1410	1445	733	1437	1975	1576	2538	2737	3648	2817	1602	1011	3744	3230	337	220	230	296	2295	1422	369	851	1398	1611	853	1565	1192	1274	SPPL2B
89	ENSG00000005238	1584	802	1524	744	767	800	574	1127	1207	1553	1434	604	910	824	1411	268	211	235	295	1144	1493	928	594	703	885	1085	695	1203	1124	FAM214B
90	ENSG00000005243	837	274	1019	595	1008	475	395	769	912	580	596	467	792	460	675	352	241	266	353	728	659	1126	1073	373	501	777	281	873	784	COPZ2
91	ENSG00000005249	83	318	460	199	319	187	160	168	141	376	238	184	74	164	300	331	201	639	718	112	125	104	338	551	278	74	238	298	398	PRKAR2B
92	ENSG00000005302	1196	849	2216	1119	1481	1178	1125	1403	1523	2377	1680	1336	1052	1907	2295	673	374	518	653	1769	1184	882	1396	1517	1186	1039	1248	1312	983	MSL3
93	ENSG00000005339	2801	4548	6328	2727	5463	2585	2047	3011	4851	4371	6909	2553	2793	4898	4614	1113	966	1156	1798	4872	2111	954	1331	3335	6086	5183	4193	3615	3683	CREBBP
94	ENSG00000005379	117	260	425	174	454	266	211	534	425	597	486	516	160	255	642	179	230	140	170	581	336	10	239	370	180	148	173	297	268	BZRAP1
95	ENSG00000005381	5	26	7	5	14	2	2	4	1	18	105	18	6	3	6	2	2	2	4	4	2	13	10	7	9	10	24	5	7	MPO
96	ENSG00000005421	1	27	7	3	11	12	31	29	2	7	1	18	1	17	4	10	5	8	17	4	1	0	25	30	21	6	45	2	11	PON1
97	ENSG00000005436	389	665	707	402	942	455	323	636	492	729	462	524	358	742	664	901	309	799	957	526	417	359	546	511	781	533	700	470	478	GCFC2
98	ENSG00000005448	215	306	198	102	403	117	105	204	159	260	266	226	244	280	263	97	69	71	88	206	169	186	254	225	212	154	226	138	165	WDR54
99	ENSG00000005469	1257	1582	1837	1060	2206	1745	1243	2778	2124	1616	1198	705	921	2341	2235	1278	400	780	1137	1962	1218	637	2043	1540	2565	1593	1864	1523	1382	CROT
100	ENSG00000005471	55	109	193	116	75	63	48	60	64	83	86	52	31	76	112	206	140	190	188	61	33	28	58	66	95	29	36	64	162	ABCB4
101	ENSG00000005483	2170	4083	5047	2484	4034	2449	2000	3693	3736	3568	3956	2156	1917	3960	4862	3387	1957	3041	4135	3896	2268	922	1893	2913	3740	3217	3720	3652	3676	MLL5
102	ENSG00000005486	1413	2212	2616	1238	1938	1066	980	1600	2010	3459	2717	1703	1343	2325	2031	200	193	156	168	1454	1395	2085	1662	1788	2089	1739	1898	1525	1331	RHBDD2
103	ENSG00000005513	25	25	14	11	49	22	22	35	20	47	17	16	16	14	21	24	32	31	21	23	17	7	18	56	31	16	36	18	49	SOX8
104	ENSG00000005700	1694	2041	2763	1559	1779	1485	1165	1811	2099	2297	1611	799	1459	1712	2380	2375	1016	2084	2170	1822	1555	584	1307	1638	2663	1619	2740	1946	1971	IBTK
105	ENSG00000005801	450	848	906	437	947	393	326	568	601	786	517	436	488	1048	881	585	286	498	543	725	552	253	480	607	547	487	722	546	568	ZNF195
106	ENSG00000005810	5580	4576	12774	6185	9213	3542	3031	5211	5976	4757	5277	2559	3206	7956	8406	18627	11730	17195	19049	7920	7101	1175	3178	6510	9678	5681	7359	10054	10335	MYCBP2
107	ENSG00000005812	1372	1786	3258	1775	3253	1284	1241	1968	1918	2376	1976	982	1596	2683	2279	3406	1411	2850	2803	2040	2029	1115	1856	2158	2026	1528	1999	2032	2369	FBXL3
108	ENSG00000005844	69	60	1081	443	206	614	579	234	393	2429	1059	951	187	508	2194	35	61	57	80	138	38	121	841	1928	234	51	159	480	369	ITGAL
109	ENSG00000005882	213	473	552	277	707	236	192	390	281	345	489	332	437	461	452	158	156	158	155	319	308	240	465	467	719	324	489	325	299	PDK2
110	ENSG00000005884	11337	4657	5685	3517	7710	3978	2335	7907	8174	9928	7938	2178	5742	4015	6236	673	524	651	751	9183	7309	4144	2542	1855	8337	6562	6644	8881	7560	ITGA3
111	ENSG00000005889	1225	1187	1609	805	2701	855	756	1127	1205	1427	1135	654	762	1182	1513	2802	1573	2270	1726	1714	757	454	779	1091	1195	1217	1303	1665	1107	ZFX
112	ENSG00000005893	7746	4689	8207	5256	10113	4899	4667	6473	8130	8372	8625	2647	5241	6431	8091	5501	2622	4321	4778	6673	6841	5704	5093	5511	9379	6435	11630	9531	7307	LAMP2
113	ENSG00000005955	2286	1959	3108	1537	2597	1826	1327	2434	2506	3142	3138	1612	1961	2143	2861	1901	1296	1731	2134	2783	2379	1016	2110	2311	2751	2410	2790	2644	2054	GGNBP2
114	ENSG00000005961	22	21	34	23	70	26	12	52	45	21	18	242	48	37	35	9	6	7	6	27	8	9	2	11	17	30	12	12	17	ITGA2B
115	ENSG00000005981	0	6	1	2	12	4	5	19	2	2	2	20	3	2	3	5	3	14	13	2	4	0	7	27	14	2	12	1	6	ASB4
116	ENSG00000006007	2926	1550	3861	1878	2608	1732	1221	2402	2703	2069	3282	1281	1501	3040	2405	1636	911	1183	993	2177	2728	2745	2370	3053	3689	2339	4689	2478	2347	GDE1
117	ENSG00000006015	650	306	535	274	641	475	416	690	663	1187	730	826	415	924	830	119	85	89	88	776	534	500	964	838	616	590	794	576	529	C19orf60
118	ENSG00000006016	507	248	236	134	2148	120	132	236	234	1164	669	226	245	1143	489	128	199	38	66	840	586	333	274	107	767	474	123	940	628	CRLF1
119	ENSG00000006025	102	152	202	72	99	242	176	234	196	361	275	234	149	246	364	38	39	41	39	186	46	31	107	233	88	177	48	140	117	OSBPL7
120	ENSG00000006042	398	2774	668	447	924	391	282	673	399	693	482	571	370	324	455	338	256	265	311	497	480	592	380	545	712	725	708	392	813	TMEM98
121	ENSG00000006047	10	10	10	5	145	53	15	41	17	40	82	202	25	270	38	62	53	65	65	34	14	5	40	36	15	14	16	53	39	YBX2
122	ENSG00000006059	4	2	24	10	69	16	0	3	4	5	111	98	14	6	6	106	21	65	1	8	27	1	7	21	42	12	5	4	3	KRT33A
123	ENSG00000006062	357	495	1334	675	838	569	413	602	854	1444	864	506	427	561	1184	208	199	178	220	781	630	158	718	1027	709	320	488	784	681	MAP3K14
124	ENSG00000006071	0	2	2	1	6	2	5	2	1	3	1	7	0	0	0	5	3	13	7	2	0	0	2	1	3	1	11	1	2	ABCC8
125	ENSG00000006074	181	97	5728	2931	229	470	177	126	465	868	65	382	158	154	561	232	235	189	37	72	14	771	3070	1617	288	24	205	5215	118	CCL18
126	ENSG00000006075	12	2	28	6	10	3	10	1	3	37	10	4	13	5	8	1	0	1	1	3	0	11	25	16	3	1	7	12	20	CCL3
127	ENSG00000006114	1423	1674	2842	1397	1933	1562	1098	1487	2088	2034	1952	1090	1181	1558	2390	1237	957	1117	1665	1969	1053	643	1377	2002	1630	1612	2042	1902	1525	SYNRG
128	ENSG00000006116	0	0	0	0	0	0	0	0	1	1	0	2	0	0	0	0	0	0	0	0	0	0	1	0	0	0	0	0	0	CACNG3
129	ENSG00000006118	608	1700	798	348	1037	404	512	854	745	1009	1976	525	1271	318	3136	44	28	35	44	513	542	777	672	553	2090	1988	1195	759	643	TMEM132A
130	ENSG00000006125	3446	3836	5624	3127	4894	3007	1776	4174	4616	4741	4966	1715	3826	3194	4704	1947	1354	1681	1866	3335	2362	2393	2058	2219	4295	4096	2528	4509	4043	AP2B1
131	ENSG00000006128	0	1	1	1	5	0	16	0	0	4	0	1	0	3	3	32	7	16	18	4	3	1	3	0	3	0	4	9	1	TAC1
132	ENSG00000006194	661	915	1199	705	1221	678	589	898	975	1165	1279	592	733	1220	1064	544	490	532	653	999	737	404	725	1109	1209	900	1501	940	959	ZNF263
133	ENSG00000006210	188	1492	618	310	1214	575	762	854	384	1111	854	909	323	334	689	102	60	114	106	283	140	199	497	1889	805	388	1207	575	1036	CX3CL1
134	ENSG00000006282	785	830	1139	566	1487	665	625	1040	747	886	1378	1191	466	973	1504	393	222	210	338	1211	492	455	846	1491	1525	890	712	1077	1268	SPATA20
135	ENSG00000006283	64	185	259	147	137	132	122	173	207	141	234	73	84	56	193	35	57	34	32	98	29	62	35	70	154	105	75	130	336	CACNA1G
136	ENSG00000006327	1891	764	1184	582	411	453	369	501	1018	1384	1207	912	1511	901	908	86	37	49	83	1896	2238	2548	578	279	1176	1338	558	1090	1028	TNFRSF12A
137	ENSG00000006377	40	25	74	30	52	58	107	120	137	156	69	112	42	71	113	21	18	27	23	92	79	19	113	76	239	45	81	34	39	DLX6
138	ENSG00000006432	3704	1040	2888	1411	1788	1290	722	1298	2804	1188	2894	737	1781	1818	2218	1192	591	665	752	4041	3247	1133	446	878	2629	2548	2655	2546	2286	MAP3K9
139	ENSG00000006451	2981	1541	3843	2022	2576	1480	1216	2052	2313	3598	1885	1488	2280	1686	2566	942	471	737	835	2356	2277	2514	2758	1908	2107	2643	2593	2169	2614	RALA
140	ENSG00000006453	1085	954	590	315	1333	599	708	964	905	1361	1133	1213	799	1081	1324	413	270	298	413	1086	926	662	816	709	962	1029	1481	874	702	BAIAP2L1
141	ENSG00000006459	2919	1775	4097	2062	2368	1325	1102	1634	2429	2859	2725	1775	2352	2019	3832	3396	2674	3259	3750	3460	3275	1156	1925	2370	2913	2872	2237	3069	3545	JHDM1D
142	ENSG00000006468	104	191	326	162	162	90	49	94	84	182	183	62	78	122	125	196	195	246	249	199	89	44	115	157	120	70	63	133	275	ETV1
143	ENSG00000006530	628	803	974	454	953	584	521	715	650	1067	807	764	520	827	1073	734	407	608	699	822	572	328	813	822	742	773	590	727	652	AGK
144	ENSG00000006534	256	179	380	243	214	161	120	170	240	569	308	206	174	206	286	80	77	64	57	164	71	167	184	270	285	80	262	217	273	ALDH3B1
145	ENSG00000006555	2949	860	3324	1650	2774	1841	1237	3112	3618	2201	2453	672	2576	2744	2928	360	211	211	361	2950	1086	1001	1444	1465	1644	1856	1644	2157	1706	TTC22
146	ENSG00000006576	896	1108	2084	1072	1616	904	602	1212	1118	1883	1606	1246	702	1648	1831	951	435	813	905	1453	968	430	1159	1457	1458	1261	936	1475	1034	PHTF2
147	ENSG00000006606	3	5	32	9	8	5	9	1	5	1	8	16	0	5	3	4	7	5	7	8	6	4	11	6	2	12	6	17	5	CCL26
148	ENSG00000006607	1063	616	878	475	911	738	656	978	1251	685	1003	338	552	904	1077	1119	579	714	1069	1187	746	246	409	582	1201	877	1309	1025	949	FARP2
149	ENSG00000006611	0	32	0	0	68	1	0	1	0	7	1	11	0	1	1	1	1	1	4	0	0	0	2	1	0	1	1	1	1	USH1C
150	ENSG00000006625	2815	1572	2926	1442	4169	3892	2162	2872	3070	4460	5305	2384	2162	2990	3435	2275	640	884	785	4427	5373	5313	4122	4210	3489	2916	5981	3118	3614	GGCT
151	ENSG00000006634	443	359	747	408	935	361	269	438	625	803	467	714	378	745	620	368	121	321	299	597	406	302	571	461	530	549	580	559	366	DBF4
152	ENSG00000006638	35	17	28	16	44	16	19	26	30	50	18	18	9	17	24	4	2	3	3	19	14	17	8	9	12	9	20	11	23	TBXA2R
153	ENSG00000006652	2515	1211	3439	1464	1302	1644	967	2226	2899	1127	2675	1106	2299	2595	2331	1915	667	1071	1121	2795	2997	1526	1334	1862	2081	1588	2090	1303	1454	IFRD1
154	ENSG00000006659	0	0	0	1	0	0	0	0	1	1	0	0	0	0	0	0	0	0	0	0	0	0	0	1	0	0	0	0	0	LGALS14
155	ENSG00000006695	611	253	827	385	695	426	259	548	624	645	414	371	325	463	526	251	142	200	201	551	369	405	592	553	731	373	964	539	398	COX10
156	ENSG00000006704	1813	4302	2080	975	1813	1089	918	1500	2882	2651	2733	1326	1554	1442	1667	409	278	258	317	2146	1701	501	930	1153	2377	2115	1237	1484	1176	GTF2IRD1
157	ENSG00000006712	1932	916	2549	1158	1757	1165	784	1557	1770	1992	1849	1035	1413	1439	1807	367	326	315	366	1750	1012	1162	1020	1203	1493	1443	1429	1509	1222	PAF1
158	ENSG00000006715	1330	1608	2403	1237	2313	1169	917	1614	1188	2083	1535	1626	1402	1874	1986	2537	1426	1767	2115	1507	1344	782	1529	1618	2144	1502	1748	1603	1985	VPS41
159	ENSG00000006740	103	84	74	44	338	93	43	122	165	143	93	230	25	57	157	112	60	71	87	30	28	25	22	61	249	90	212	99	103	ARHGAP44
160	ENSG00000006744	2851	1310	3157	1547	3330	1868	1357	2765	3284	3469	2488	1687	1341	2148	2741	836	726	837	893	3011	1705	1231	1517	1827	2490	1364	3860	2352	1706	ELAC2
161	ENSG00000006747	27	27	83	59	272	32	103	86	26	52	51	119	56	45	73	348	177	364	205	25	61	9	201	69	149	11	50	43	76	SCIN
162	ENSG00000006756	588	724	724	400	1295	581	575	847	787	972	540	562	516	590	905	619	337	478	445	780	494	335	910	710	1213	480	994	1163	695	ARSD
163	ENSG00000006757	760	281	522	277	949	284	255	457	324	464	397	252	456	510	384	312	175	289	191	752	356	623	795	541	773	466	856	617	360	PNPLA4
164	ENSG00000006788	22	11	2	0	2	5	3	3	3	10	0	16	5	3	2	1	1	3	14	8	1	15	7	2	8	6	7	12	6	MYH13
165	ENSG00000006831	4666	2801	5799	2745	4415	2854	1827	3338	4924	3978	5288	1913	3882	4352	4994	1712	1102	1562	1708	3771	5499	3143	3124	3822	5343	4544	6901	3444	3349	ADIPOR2
166	ENSG00000006837	40	62	52	25	73	36	23	65	54	44	38	60	35	69	49	84	44	78	110	62	59	23	68	47	87	56	40	55	40	CDKL3
167	ENSG00000007001	0	2	0	1	1	0	0	3	0	1	1	1	1	1	0	4	1	5	12	0	0	2	5	1	1	0	0	0	0	UPP2
168	ENSG00000007038	106	23	27	13	607	10	191	222	30	169	245	244	174	101	109	1	1	4	1	143	29	27	11	59	65	569	334	65	35	PRSS21
169	ENSG00000007047	1546	1557	2639	1179	1707	1030	1081	1838	1591	2040	3156	605	1156	1652	1734	237	196	215	266	1464	1479	978	765	1922	2437	2287	3333	1338	1672	MARK4
170	ENSG00000007062	7	38	7	17	24	51	47	88	26	6	26	20	23	25	19	108	79	130	126	10	11	9	18	53	43	12	160	18	59	PROM1
171	ENSG00000007080	2514	984	2016	982	1570	862	554	1048	1465	2071	1420	1187	1216	1459	1420	156	146	110	90	1756	1319	2156	1544	1108	1885	1641	2000	1459	1295	CCDC124
172	ENSG00000007129	5	4	69	25	15	18	21	14	17	53	37	27	14	12	84	6	7	7	3	5	1	21	50	69	10	9	12	35	15	CEACAM21
173	ENSG00000007168	8182	5857	12015	5803	9986	6303	5015	8411	10197	8737	10661	3969	5213	6301	9067	5406	2885	4643	5835	9330	7885	4140	4111	6324	10387	7059	11499	9208	9219	PAFAH1B1
174	ENSG00000007171	2	110	4	4	54	5	2	4	3	7	8	8	2	12	23	13	8	3	10	1	0	4	18	6	7	3	5	10	12	NOS2
175	ENSG00000007174	31	10	43	24	91	32	35	43	40	50	17	33	16	20	41	77	80	58	112	32	24	9	101	21	37	8	13	87	30	DNAH9
176	ENSG00000007202	5193	4527	8269	4175	6465	3604	2533	5101	6955	5269	5426	2254	3667	3775	5677	3141	2192	2491	3189	5333	3318	2542	2880	3824	5933	3956	7469	5349	5575	KIAA0100
177	ENSG00000007216	1	3	5	0	21	9	2	3	4	6	1	2	2	2	2	21	39	32	27	4	2	0	0	72	7	0	12	2	18	SLC13A2
178	ENSG00000007237	5726	3947	6041	3792	4207	3283	3629	3545	6160	5633	6534	2830	1461	4464	6072	4354	3612	2621	3076	5603	5632	3111	2060	3751	9270	4445	11756	5210	6287	GAS7
179	ENSG00000007255	127	290	304	168	470	183	202	284	163	307	228	236	146	398	302	184	97	99	98	197	268	287	491	460	411	196	818	183	242	TRAPPC6A
180	ENSG00000007264	32	59	86	32	376	127	80	153	618	432	120	379	77	221	431	1	9	17	12	38	14	67	222	262	128	11	520	134	137	MATK
181	ENSG00000007306	12	4	5	0	19	24	20	7	9	23	4	13	19	9	17	21	22	17	25	72	104	19	5	5	3	6	4	33	35	CEACAM7
182	ENSG00000007312	35	43	173	94	61	120	92	37	72	136	74	148	47	59	241	29	10	9	49	25	15	134	375	255	56	23	56	121	63	CD79B
183	ENSG00000007314	6	3	3	4	33	12	11	23	8	13	17	36	4	2	9	7	6	20	17	6	1	1	6	20	16	6	16	3	15	SCN4A
184	ENSG00000007341	347	493	613	350	1316	433	435	635	619	717	524	511	433	697	744	1032	737	876	1190	778	478	286	568	581	669	486	564	486	514	ST7L
185	ENSG00000007350	109	4	31	21	46	25	30	27	27	165	79	15	38	76	133	17	4	7	6	159	118	15	28	27	34	36	20	53	33	TKTL1
186	ENSG00000007372	61	537	165	96	202	59	78	97	50	246	59	62	73	665	246	103	30	64	87	95	53	19	247	232	76	24	92	66	99	PAX6
187	ENSG00000007376	919	387	1087	570	911	512	400	797	918	1316	1322	547	629	1144	629	89	77	51	64	874	755	533	705	733	857	940	1280	650	569	RPUSD1
188	ENSG00000007384	1638	949	1320	643	1106	1247	1064	1698	2070	2648	1851	781	1368	2248	1743	378	332	247	298	2168	1362	638	972	1096	1285	960	1074	976	1198	RHBDF1
189	ENSG00000007392	926	1382	1378	713	1015	1441	1117	1836	1412	1924	1911	946	922	2251	1987	921	662	844	990	1615	1631	408	1037	1090	944	765	1055	936	985	LUC7L
190	ENSG00000007402	48	344	110	46	489	173	117	306	123	148	114	107	50	104	200	88	67	73	73	169	50	32	240	160	128	48	450	125	156	CACNA2D2
191	ENSG00000007516	76	20	62	29	203	92	112	182	134	156	164	112	120	238	224	21	26	15	22	70	27	24	89	97	115	47	159	65	49	BAIAP3
192	ENSG00000007520	1119	466	947	527	1006	458	340	601	771	1106	927	458	750	803	667	124	94	89	69	885	729	973	924	798	948	721	982	740	697	TSR3
193	ENSG00000007541	866	687	1041	490	1100	732	572	1188	1127	1858	1780	689	667	1585	1039	176	142	104	129	959	845	378	727	858	1172	676	1335	736	934	PIGQ
194	ENSG00000007545	439	807	720	402	854	606	476	830	911	1062	1157	474	561	1083	811	171	117	153	179	876	541	117	346	535	650	485	600	499	562	CRAMP1L
195	ENSG00000007866	2398	2142	2806	1399	2418	1824	1304	2060	3568	3347	3810	1750	2697	3953	2954	440	322	340	371	2553	2914	1247	1439	1682	2559	2795	2520	1930	1845	TEAD3
196	ENSG00000007908	686	107	1639	887	244	705	290	251	492	2529	99	36	30	276	933	221	41	276	60	667	1749	567	210	379	2784	163	1890	1232	3051	SELE
197	ENSG00000007923	1365	857	1467	728	1458	981	672	1369	1756	2027	1421	893	960	1556	1711	512	371	443	451	1707	866	542	795	1059	1393	1266	1989	1282	1079	DNAJC11
198	ENSG00000007933	154	36	354	218	224	57	81	60	98	187	352	387	126	215	371	74	69	76	340	126	115	141	142	238	112	46	140	204	218	FMO3
199	ENSG00000007944	370	878	1307	663	1774	895	664	1189	849	1533	1022	577	788	1946	1240	1299	839	834	853	789	308	287	1518	1270	1618	525	1959	836	862	MYLIP
200	ENSG00000007952	7	8	22	15	23	15	18	30	19	19	13	11	22	11	15	21	6	12	27	22	29	2	7	8	18	7	9	12	6	NOX1
201	ENSG00000007968	407	351	751	341	2020	460	259	643	962	1481	676	1346	214	2368	1666	270	118	115	129	1503	230	79	340	473	440	462	340	415	300	E2F2
202	ENSG00000008018	4628	2302	4406	2287	3241	2449	1763	3371	3496	5398	3804	3652	4066	4205	4051	1879	1151	1332	1538	4079	4576	5907	6568	4670	4766	4115	5594	3707	3939	PSMB1
203	ENSG00000008056	13	32	14	8	30	14	16	22	19	23	13	19	8	16	22	8	5	5	8	17	13	33	30	8	11	13	9	8	18	SYN1
204	ENSG00000008083	2637	1504	3521	1596	3895	1471	1372	2133	2195	2904	4637	1328	1793	2149	2933	1503	903	938	1331	3362	3026	988	875	1864	3852	2828	2114	2291	2404	JARID2
205	ENSG00000008086	207	69	218	96	127	16	6	18	40	17	48	27	58	79	65	240	148	207	251	136	99	36	51	87	151	230	127	195	113	CDKL5
206	ENSG00000008118	6	20	8	8	1	1	6	1	3	15	4	2	4	2	14	13	9	15	8	7	1	9	5	5	4	5	3	7	4	CAMK1G
207	ENSG00000008128	20	15	14	9	22	36	26	43	42	62	62	32	25	40	49	28	21	24	37	47	24	1	10	23	27	32	22	21	22	CDK11A
208	ENSG00000008130	2148	1371	2879	1481	2273	1786	1263	2480	2224	3369	2302	1678	1504	3289	3299	686	559	467	491	2615	2037	1446	1542	2419	2652	1431	4632	1997	1581	NADK
209	ENSG00000008196	290	6305	176	151	219	249	425	185	229	251	118	86	50	245	391	351	120	310	165	594	404	68	378	309	490	96	258	179	241	TFAP2B
210	ENSG00000008197	0	0	0	0	0	0	1	0	0	0	0	0	0	1	0	0	1	0	0	0	0	0	1	1	0	0	0	0	0	TFAP2D
211	ENSG00000008226	47	48	53	17	33	26	36	45	56	114	40	38	37	40	95	65	69	38	65	40	46	3	28	56	54	23	48	29	34	DLEC1
212	ENSG00000008256	1657	1715	2669	1532	2370	1142	1137	1351	1653	2341	2807	1246	1163	1519	2135	1031	773	962	804	1919	1517	515	815	1357	2243	1372	1747	1514	2243	CYTH3
213	ENSG00000008277	27	88	158	104	337	79	57	120	45	84	131	140	30	118	159	449	142	388	652	50	34	8	53	102	95	31	61	68	145	ADAM22
214	ENSG00000008282	5110	4052	7330	3823	7232	5434	4118	6790	7839	6797	5778	4524	5592	4835	5638	2323	812	1525	1803	5934	4265	5212	4320	4715	5735	7215	6798	6845	5508	SYPL1
215	ENSG00000008283	2684	1561	3222	1538	2435	1882	1428	2499	3601	3423	2849	1297	1453	2084	2778	697	541	541	480	2768	1984	1442	1771	1814	2474	1855	3283	2273	2147	CYB561
216	ENSG00000008294	5859	5091	10757	5147	4933	3333	2860	4243	5613	4727	6737	3380	4826	3321	5542	6550	3654	5259	6010	6984	5184	2334	3008	4004	7317	5988	6864	6459	5879	SPAG9
217	ENSG00000008300	196	205	473	201	1294	361	151	289	281	471	517	957	452	500	372	61	46	29	41	917	358	122	174	208	1441	334	519	499	433	CELSR3
218	ENSG00000008311	311	767	908	509	883	874	323	758	1196	323	784	295	515	585	855	629	500	778	784	452	625	101	503	641	708	517	570	480	550	AASS
219	ENSG00000008323	562	271	436	219	438	236	264	479	497	838	373	380	346	1162	985	201	127	198	234	262	367	320	331	406	774	681	1383	383	263	PLEKHG6
220	ENSG00000008324	357	302	516	240	580	262	217	306	294	348	309	171	315	305	331	158	96	123	122	334	507	456	572	345	368	351	376	294	375	SS18L2
221	ENSG00000008382	220	187	242	139	194	129	124	148	146	240	223	158	115	276	237	53	43	42	50	179	144	171	202	203	247	119	369	185	188	MPND
222	ENSG00000008394	1006	1712	352	174	243	1788	1566	5228	1176	1205	247	2004	253	1122	1344	1120	221	497	579	666	2499	3590	3147	6550	8092	1543	28011	1262	1257	MGST1
223	ENSG00000008405	530	766	1411	692	853	508	375	625	607	916	897	526	381	1662	1216	536	397	405	436	917	934	325	456	956	1001	344	762	525	713	CRY1
224	ENSG00000008438	4	4	3	2	2	2	2	4	7	5	4	1	1	11	8	8	5	5	7	3	3	4	1	2	2	6	6	11	7	PGLYRP1
225	ENSG00000008441	2558	8402	8411	4253	8232	4774	4183	7208	5320	6588	10649	3917	1855	3613	6336	722	585	611	530	5687	2045	792	1385	3727	6882	5073	9272	5200	6030	NFIX
226	ENSG00000008513	547	960	1482	829	683	535	397	401	647	1821	1043	544	668	508	1452	404	576	416	594	452	509	680	461	959	1671	2982	1978	895	1080	ST3GAL1
227	ENSG00000008516	68	18	148	80	50	241	124	97	621	467	76	66	108	80	217	7	8	7	17	57	42	173	127	260	51	22	53	100	51	MMP25
228	ENSG00000008517	132	140	1990	991	279	455	471	224	294	1807	614	700	787	458	1188	53	50	40	47	159	75	1064	2231	2485	256	91	208	895	558	IL32
229	ENSG00000008710	1740	2894	3667	1976	4061	1946	1729	2721	2974	4143	5124	1836	1450	4873	3739	920	849	714	816	4147	2283	220	1062	2063	3220	2052	4288	2600	3237	PKD1
230	ENSG00000008735	305	198	897	324	1061	329	335	648	358	768	468	402	352	230	1262	34	19	7	14	823	326	323	159	355	929	137	4187	461	466	MAPK8IP2
231	ENSG00000008838	2008	2042	2833	1429	2172	1667	1250	2391	2871	3015	2617	1620	1590	2790	2486	484	358	379	422	2658	1452	1079	1189	1769	2353	2536	2298	1876	1659	MED24
232	ENSG00000008853	320	409	676	366	484	218	149	310	280	438	492	250	185	175	385	96	102	121	116	259	244	137	199	270	307	425	255	477	470	RHOBTB2
233	ENSG00000008869	1481	1564	2832	1480	2210	1565	1126	1973	1906	1762	2102	1802	1415	2055	2455	2901	2009	2469	2651	2778	1979	473	1602	1825	2311	1739	2220	1489	1589	HEATR5B
234	ENSG00000008952	2497	2358	3625	1971	3544	2203	1789	2935	2412	3332	2425	1639	2398	2094	3377	3033	1366	2918	3001	2364	2411	2210	2497	2989	3651	3415	4708	3398	3244	SEC62
235	ENSG00000008988	14552	12764	17609	9506	22647	8946	7606	10403	10213	19374	13072	12697	9839	12841	12166	12481	8443	9226	10013	11337	14489	35643	29370	19139	20553	19480	34693	13740	15762	RPS20
236	ENSG00000009307	18562	17689	24591	13365	28814	15675	10275	21259	23824	23775	25809	10295	19298	22200	24930	17517	11315	14275	15600	19917	17550	15115	17074	18776	26728	26036	27082	16972	18177	CSDE1
237	ENSG00000009335	5019	3024	7534	3634	4461	3582	2648	4718	6306	5597	5163	2881	3757	5143	5528	3128	2011	2529	2773	5596	3971	2871	2900	3587	5089	4750	6493	4575	4386	UBE3C
238	ENSG00000009413	1434	1474	2595	1542	1600	1236	805	1196	1463	1835	2561	2017	994	1526	2209	6478	4082	5586	7427	2254	1406	367	1027	1632	2057	1485	1709	1994	3148	REV3L
239	ENSG00000009694	31	34	93	69	45	85	40	58	51	82	124	133	25	15	181	556	510	710	715	220	129	3	101	233	124	22	31	91	92	TENM1
240	ENSG00000009709	0	4	0	0	85	6	12	5	2	90	3	263	0	2	1	0	0	0	0	2	0	1	1	1	1	0	1	1	1	PAX7
241	ENSG00000009724	127	224	217	117	277	203	179	285	236	252	346	161	118	358	379	241	194	260	401	235	227	32	222	228	346	151	211	148	191	MASP2
242	ENSG00000009765	8	10	10	3	7	11	7	21	1	3	2	5	25	10	5	43	7	18	9	3	7	4	12	113	172	10	281	5	17	IYD
243	ENSG00000009780	550	765	799	436	1012	519	509	742	645	1001	871	583	428	967	871	659	360	763	639	652	771	353	651	839	891	540	1004	764	800	FAM76A
244	ENSG00000009790	505	772	1310	679	487	566	720	355	485	2231	807	1023	612	465	1972	267	180	199	346	580	551	345	1057	1613	552	320	420	628	721	TRAF3IP3
245	ENSG00000009830	664	782	890	449	944	589	449	876	907	981	811	483	530	1338	871	185	171	154	188	1078	656	223	256	428	592	542	684	667	623	POMT2
246	ENSG00000009844	2095	1733	2861	1420	1744	1194	939	1759	1712	2353	1738	1407	2097	1838	1956	1178	526	869	1008	1876	1820	1609	2000	1678	2154	1904	1979	1784	1918	VTA1
247	ENSG00000009950	4	12	6	5	166	36	31	102	15	194	39	125	8	66	36	26	63	60	36	23	28	1	8	38	200	10	141	16	14	MLXIPL
248	ENSG00000009954	2116	2528	4601	2338	5278	2203	1748	3199	3476	4796	2978	3283	1697	2969	3997	1983	1298	1541	2154	3419	1470	756	1123	2027	2815	3314	3331	3537	2388	BAZ1B
249	ENSG00000010017	3315	2291	4013	1997	3266	2328	1502	2635	3961	3700	4353	1817	2908	3392	3405	1550	754	1264	1475	3524	3384	2125	2323	3056	3837	3146	3064	2605	2607	RANBP9
250	ENSG00000010030	76	114	228	142	377	171	246	147	210	676	224	336	144	192	434	164	117	128	90	111	218	178	364	300	187	101	344	234	195	ETV7
251	ENSG00000010072	660	632	1066	534	1098	531	324	727	715	868	940	548	567	899	801	706	328	565	588	752	516	414	600	805	970	753	1086	669	604	SPRTN
252	ENSG00000010165	1005	1119	1380	680	1550	848	628	1040	1292	1316	762	606	788	980	1110	409	314	425	321	1428	688	572	834	867	1135	1026	1323	1027	799	METTL13
253	ENSG00000010219	356	325	415	211	363	205	185	303	303	405	238	272	203	313	270	198	134	146	169	286	342	337	441	368	376	261	314	246	193	DYRK4
254	ENSG00000010244	4919	4436	6828	3573	5971	4188	2897	5008	5743	7162	5716	3833	5309	5363	6537	7728	3127	6777	7458	6553	5151	3709	5847	4869	5968	4884	5689	5212	4391	ZNF207
255	ENSG00000010256	4625	3068	5362	2773	8926	2957	2261	4769	4615	5396	4352	2275	3877	4841	4518	1415	967	1063	1104	4282	3407	4965	3983	3540	6143	2903	12749	3179	3336	UQCRC1
256	ENSG00000010270	354	416	567	344	653	205	188	322	304	614	253	305	324	433	350	265	160	244	279	298	333	451	558	438	437	350	236	387	506	STARD3NL
257	ENSG00000010278	8654	8357	13358	7257	16033	4841	5055	7798	7516	10844	9530	5638	8585	13446	12188	4614	3578	3553	3684	7974	10357	7317	12853	7240	11995	10585	14815	10797	8943	CD9
258	ENSG00000010282	1	3	0	0	2	1	2	4	0	3	3	2	1	1	1	12	7	5	2	0	3	0	1	5	0	0	1	1	0	HHATL
259	ENSG00000010292	2367	2438	2902	1422	4324	1658	1236	2438	3239	3185	2236	2239	2063	4079	2652	1113	505	623	710	2549	1161	970	1715	1859	2734	2792	2076	2234	1590	NCAPD2
260	ENSG00000010295	249	188	531	281	239	421	319	248	348	1148	604	485	196	329	875	138	146	146	138	315	116	75	422	693	206	105	210	302	378	IFFO1
261	ENSG00000010310	199	43	156	74	108	204	284	192	597	259	111	205	161	203	421	56	50	53	48	362	214	14	86	107	101	157	64	210	113	GIPR
262	ENSG00000010318	293	266	381	182	438	214	206	355	284	323	317	173	144	568	350	174	122	132	200	463	232	135	299	249	307	132	281	199	198	PHF7
263	ENSG00000010319	203	461	612	315	545	469	277	617	156	336	273	216	57	123	332	280	265	226	301	305	97	99	108	534	783	109	3762	239	607	SEMA3G
264	ENSG00000010322	2268	4803	4183	2027	5163	3282	2800	4653	4470	4753	4849	1864	1925	5423	5455	1917	1649	1531	1923	5386	3030	693	2041	2405	3695	1754	3410	2758	2865	NISCH
265	ENSG00000010327	788	660	2040	1044	1151	3344	1531	1680	2818	5818	2764	1471	1316	1338	4033	1286	1679	877	865	1372	431	388	1216	2283	1038	334	1222	1315	1669	STAB1
266	ENSG00000010361	108	249	144	82	290	160	92	212	152	133	149	127	66	185	222	68	44	54	51	152	106	91	175	142	142	73	94	137	105	FUZ
267	ENSG00000010379	6	5	2	2	2	5	0	2	8	5	0	4	2	3	5	4	1	2	8	3	2	1	2	5	1	0	2	3	0	SLC6A13
268	ENSG00000010404	2385	3378	4866	2580	3374	2195	2321	2400	3217	4552	4170	1834	2329	3433	4713	1242	602	1114	1531	2673	2458	1412	1768	3069	3071	2550	2639	3207	3700	IDS
269	ENSG00000010438	2612	646	1615	631	774	672	231	1001	2097	2170	1635	289	728	703	508	221	162	192	192	1356	1161	2584	384	588	1102	2312	801	867	1186	PRSS3
270	ENSG00000010539	186	233	437	212	440	237	193	268	327	510	395	195	287	375	398	203	142	183	182	277	245	198	247	414	178	235	447	302	248	ZNF200
271	ENSG00000010610	455	397	3100	1497	990	1547	906	798	1185	4021	1501	1219	655	1100	3009	341	446	385	417	409	67	1117	1417	2392	769	225	571	1471	1095	CD4
272	ENSG00000010626	90	160	181	87	118	83	73	108	117	140	120	113	100	161	93	108	88	92	76	153	98	93	150	144	191	73	111	86	132	LRRC23
273	ENSG00000010671	148	138	479	286	186	321	191	193	298	566	337	240	207	199	513	186	225	190	254	138	65	280	445	378	168	97	124	295	245	BTK
274	ENSG00000010704	204	256	338	192	246	272	192	289	286	285	249	110	120	253	309	179	130	176	226	226	123	103	266	290	374	205	302	254	277	HFE
275	ENSG00000010803	697	840	947	517	2064	550	435	882	826	1175	921	1092	537	999	1146	453	308	390	416	850	690	598	1016	798	1273	775	796	653	792	SCMH1
276	ENSG00000010810	606	1448	2460	1444	1064	921	969	727	999	2753	1508	1304	554	712	2100	1364	1199	1225	1233	578	374	665	1233	2254	879	333	630	1325	1438	FYN
277	ENSG00000010818	2365	1771	4880	2495	2870	1283	835	1470	1728	1838	3120	1879	1923	1858	3498	1774	1624	1664	2201	4271	3186	851	1425	2555	4358	2510	1828	3495	3638	HIVEP2
278	ENSG00000010932	79	233	109	89	105	468	151	185	1079	378	225	277	37	279	355	167	52	116	185	44	28	225	97	263	370	218	182	6	163	FMO1
279	ENSG00000011007	2920	1491	3684	1916	2375	1905	1392	2588	3503	3294	2355	1640	1897	2685	3027	1331	948	1158	1190	3095	2434	1586	1950	2071	2710	2434	3439	2576	2420	TCEB3
280	ENSG00000011009	1959	1179	1849	982	1874	1280	894	1689	1823	2632	1938	1139	1695	1977	2069	284	227	207	197	1790	1509	2086	2043	1516	1823	1719	2600	1542	1392	LYPLA2
281	ENSG00000011021	501	659	743	372	650	645	424	711	726	1058	890	500	461	1548	1003	340	246	312	356	834	564	112	404	560	626	557	601	621	655	CLCN6
282	ENSG00000011028	2554	4483	6434	4101	2772	2927	2317	4231	3937	5027	6287	3649	1622	2181	4734	975	714	677	784	3150	1382	1097	847	1473	3588	2304	3420	4699	4842	MRC2
283	ENSG00000011052	0	0	0	0	0	0	0	0	0	0	0	0	0	0	0	0	0	0	0	0	0	0	0	0	0	0	0	0	0	NME2
284	ENSG00000011083	10	2	4	3	79	3	5	0	5	32	4	17	7	688	4	1	4	3	4	3	2	8	8	6	5	2	4	4	6	SLC6A7
285	ENSG00000011105	2551	2809	4001	1986	2503	1194	986	1720	1901	3062	3008	883	1709	1433	2593	853	536	515	708	2669	2004	1326	1388	1669	3727	2482	2630	2568	2782	TSPAN9
286	ENSG00000011114	2025	2037	3457	1734	4034	1349	1024	1726	2195	1686	1919	1209	1398	2172	2538	1664	1003	1400	1847	2604	2021	1048	868	1615	2435	2098	2644	2284	2213	BTBD7
287	ENSG00000011132	316	216	472	239	414	396	282	451	533	649	422	346	263	403	614	75	69	54	76	442	505	275	392	444	364	174	425	370	322	APBA3
288	ENSG00000011143	337	553	507	262	592	408	300	592	545	465	361	342	334	442	481	238	181	218	200	625	303	218	410	402	581	351	450	363	343	MKS1
289	ENSG00000011198	2114	1360	2279	1236	2164	1786	1214	3301	1726	1342	1869	514	1155	1855	1692	3188	974	1476	1535	1666	2400	2443	2198	3863	4646	1664	11367	1616	1889	ABHD5
290	ENSG00000011201	228	632	555	376	1013	276	166	643	431	178	883	270	627	352	612	478	101	256	435	771	703	254	258	237	722	404	211	786	493	KAL1
291	ENSG00000011243	798	669	928	453	818	854	628	1111	1168	1625	1725	861	631	1404	1338	495	417	340	462	1062	750	289	536	944	1024	869	1078	607	616	AKAP8L
292	ENSG00000011258	776	2198	1648	908	1668	953	975	1297	1277	1119	1394	934	791	1210	1370	2004	1068	2054	2106	1298	1226	226	962	1197	1481	908	1171	1052	1010	MBTD1
293	ENSG00000011260	1362	1163	2047	1120	1479	986	704	1359	1300	1567	1268	942	1239	886	1284	948	557	694	770	1571	1411	1105	1110	1151	1444	1279	1628	1564	1292	UTP18
294	ENSG00000011275	1239	1448	2569	1267	2174	1194	1018	1398	1726	3030	2107	1486	965	1902	2195	1093	851	997	1167	1606	1151	565	1136	1824	1796	1336	1802	1354	1490	RNF216
295	ENSG00000011295	1124	1261	1872	1058	2045	1310	1107	1600	1943	1811	1704	1249	773	1537	1983	1541	914	1407	1533	1583	1744	743	1634	1488	2116	1052	2420	1550	1446	TTC19
296	ENSG00000011304	10319	6359	12978	6027	12416	6672	4772	9796	11888	16279	12378	7567	7912	11461	12233	1094	767	820	724	11377	6146	6026	5164	6269	9514	6199	10586	7451	7796	PTBP1
297	ENSG00000011332	69	16	146	74	100	52	39	60	52	57	314	42	84	50	49	6	0	0	2	109	205	27	10	28	71	234	30	71	87	DPF1
298	ENSG00000011347	394	295	378	168	509	390	549	605	564	625	333	792	731	234	801	46	42	35	40	387	449	543	73	200	1718	1173	1804	259	652	SYT7
299	ENSG00000011376	546	473	837	458	1359	440	281	551	676	894	670	231	466	714	698	522	303	345	381	732	374	332	372	492	652	410	1125	459	519	LARS2
300	ENSG00000011405	2699	2460	4424	2082	2417	1571	1227	1825	2540	1679	2401	934	1830	1658	2541	4493	2333	3622	4184	3601	2426	813	1220	2039	3932	2727	3437	2902	3121	PIK3C2A
301	ENSG00000011422	851	246	795	439	446	191	411	164	266	1223	436	402	546	613	1275	95	85	56	61	623	300	1227	428	232	509	447	237	468	554	PLAUR
302	ENSG00000011426	2288	1362	1879	878	5561	875	504	1231	1847	3021	1388	3628	1294	2534	1943	1962	400	809	755	2103	674	405	1672	995	2018	2185	1060	1529	694	ANLN
303	ENSG00000011451	2821	1902	3321	1623	3839	1755	1331	2568	3275	6000	3450	2167	2004	2699	3453	177	140	116	148	3116	2064	1339	1046	1808	3257	2496	2898	2252	2187	WIZ
304	ENSG00000011454	1884	1803	2938	1650	4043	1511	1244	2134	1836	2026	1824	1578	2183	2544	2662	2693	1656	2233	2580	2814	2293	702	1090	2190	3142	2189	3396	2200	2241	RABGAP1
305	ENSG00000011465	14374	10226	46414	26754	17440	13133	9913	8808	18612	28488	30730	20643	11902	7860	21402	50666	32708	50067	62598	9632	8509	24535	13782	15401	19657	6176	12167	19460	32625	DCN
306	ENSG00000011478	146	143	273	137	245	241	265	233	319	349	263	184	129	416	347	51	40	29	40	328	146	129	197	198	268	211	433	269	166	QPCTL
307	ENSG00000011485	1388	1096	1776	862	2211	888	715	1331	1323	2128	1406	1356	783	1705	1793	461	324	344	419	1712	869	719	1055	1207	1308	1215	1809	1525	1321	PPP5C
308	ENSG00000011523	506	1690	1311	816	1970	774	635	933	773	899	1215	933	530	906	1247	1230	947	1383	1579	957	598	366	844	1376	2132	1002	1285	839	1256	CEP68
309	ENSG00000011566	1125	1209	1775	1025	2014	1013	1021	1274	1392	1685	1775	1137	1079	1672	1829	2905	1213	2138	2234	1606	1715	450	910	1253	1976	1384	1595	1188	1639	MAP4K3
310	ENSG00000011590	30	3	61	27	7	40	13	12	31	123	24	57	57	31	64	31	20	21	34	28	11	7	58	51	10	7	37	32	10	ZBTB32
311	ENSG00000011600	308	164	907	484	399	329	200	182	388	1582	446	393	381	323	692	117	116	81	109	175	56	2043	1414	1021	299	111	353	539	587	TYROBP
312	ENSG00000011638	1342	936	1580	801	2335	1083	1133	1437	1630	1844	1763	634	1299	2202	1533	1275	991	1019	1124	1176	1300	1520	2477	1870	2405	1444	2966	1219	1127	TMEM159
313	ENSG00000011677	30	171	120	24	396	5	16	42	7	28	27	5	3	81	66	10	5	2	12	73	22	5	5	131	102	11	22	56	18	GABRA3
314	ENSG00000012048	641	839	1067	416	921	454	265	719	899	591	372	421	428	824	593	849	223	331	473	1077	290	102	363	342	677	555	511	700	454	BRCA1
315	ENSG00000012061	1294	1000	1422	766	1253	1111	1125	1546	1411	1879	1447	1182	956	1862	1795	687	481	487	628	1499	1112	2076	1570	1421	1973	1235	3986	1034	1050	ERCC1
316	ENSG00000012124	21	17	131	45	12	121	83	21	65	57	41	102	52	33	183	11	12	7	10	10	7	26	186	159	41	20	15	78	31	CD22
317	ENSG00000012171	112	1368	67	44	118	145	154	155	147	203	276	81	100	93	137	185	80	155	134	128	116	34	46	104	86	124	60	65	139	SEMA3B
318	ENSG00000012174	492	476	825	450	738	427	416	524	635	907	613	341	386	693	719	417	157	359	371	621	403	391	447	575	828	592	773	663	623	MBTPS2
319	ENSG00000012211	662	382	701	360	608	554	423	700	845	833	749	319	706	672	776	82	66	75	64	814	377	386	385	499	480	518	715	596	460	PRICKLE3
320	ENSG00000012223	277	10	2497	824	2094	16514	479	2020	20900	7108	858	802	269	827	1894	54	67	156	248	731	5	19	2404	1576	946	19	3010	132	183	LTF
321	ENSG00000012232	3123	1565	4501	2188	3331	2017	1363	2679	3359	2577	3626	829	1980	1650	2890	787	553	587	572	2915	1936	1399	1065	1181	4601	4014	5882	3332	2516	EXTL3
322	ENSG00000012504	0	0	0	0	1	11	1	7	1	0	0	0	0	0	1	1	0	0	1	0	0	3	4	5	2	0	10	1	0	NR1H4
323	ENSG00000012660	1092	1667	3083	1436	2189	3070	2117	8772	2231	3406	1908	1326	1502	2097	2148	2601	345	1316	1290	1201	958	2017	2823	9427	7494	1966	40513	1658	2176	ELOVL5
324	ENSG00000012779	210	197	889	407	271	418	251	330	497	1469	593	475	269	409	885	142	198	99	195	202	105	627	550	562	413	234	285	394	282	ALOX5
325	ENSG00000012817	3	2177	2050	1300	3	1465	1423	1752	1829	2365	1891	869	1135	2548	2374	0	0	1	2109	1	1685	345	1263	1186	1436	1125	1279	2	1371	KDM5D
326	ENSG00000012822	3067	3152	4101	2267	4430	4988	4041	5934	6972	4428	6099	2029	3408	6683	6593	3956	2768	2515	3359	5635	4176	1253	2476	4332	5092	3315	5229	3055	3840	CALCOCO1
327	ENSG00000012963	978	1209	1618	922	2480	833	671	1160	920	1504	957	1385	713	1771	1568	683	383	467	496	1459	767	623	712	1154	1303	963	1257	1294	1098	UBR7
328	ENSG00000012983	2859	2480	3050	1772	3052	2012	1831	2752	2791	2553	3745	1922	2111	2286	3269	3197	1463	2654	2903	3128	3206	979	1306	1959	3142	2559	2304	3138	2715	MAP4K5
329	ENSG00000013016	407	424	795	453	758	294	153	522	478	593	1467	290	522	143	321	140	63	61	138	648	397	223	426	330	958	721	545	533	887	EHD3
330	ENSG00000013275	2791	1601	3507	1658	2326	1854	1230	2562	3254	3271	3209	1621	2279	2681	2880	792	517	560	606	2760	1780	2862	2423	2241	2555	2419	3606	2422	2180	PSMC4
331	ENSG00000013288	1107	1039	1733	939	2095	1065	985	1350	1391	2593	1988	1371	683	2104	2013	632	475	483	536	1140	763	570	1034	1475	2035	576	1739	1592	1839	MAN2B2
332	ENSG00000013293	1	0	0	0	0	0	0	0	1	0	1	3	0	0	1	36	22	26	22	0	0	1	1	1	0	0	0	0	0	SLC7A14
333	ENSG00000013297	36	28	133	81	72	58	46	56	63	165	204	36	27	53	135	203	165	178	124	39	45	56	37	82	134	39	66	38	188	CLDN11
334	ENSG00000013306	5442	2413	4137	2073	3397	2907	2052	3644	5140	5042	5005	3824	4610	3745	4286	594	402	425	420	5022	4840	5101	4103	3734	4542	3570	6390	3371	3139	SLC25A39
335	ENSG00000013364	3898	1639	5522	3090	3146	4153	2837	3699	4894	8641	3797	2136	3087	2677	4813	912	781	594	705	2219	1908	3342	3042	3024	3204	1579	2161	3236	3042	MVP
336	ENSG00000013374	1241	1074	2925	1490	2007	1227	1164	1542	1308	2859	1548	1786	1426	1805	2260	1120	824	952	1039	1496	984	988	2317	2264	2093	1130	1735	1883	1519	NUB1
337	ENSG00000013375	1008	1000	1219	626	722	727	579	892	996	1119	780	484	787	788	1556	1298	590	1004	1222	890	757	710	834	691	949	670	1153	821	884	PGM3
338	ENSG00000013392	70	195	151	92	104	126	97	128	109	137	155	65	85	100	171	113	81	116	129	81	121	75	187	161	146	85	182	103	91	RWDD2A
339	ENSG00000013441	2697	3221	4308	2540	4228	4083	3335	5306	4031	5106	5606	3646	3944	6232	6178	4178	3115	4932	4792	5746	5359	815	4211	4037	2709	2592	3041	3335	2374	CLK1
340	ENSG00000013503	879	521	1084	526	1288	656	359	776	1001	1232	931	545	515	903	1002	787	428	510	606	924	613	305	417	878	888	971	1073	895	732	POLR3B
341	ENSG00000013523	508	638	801	474	1207	709	460	693	970	801	635	503	511	699	973	219	192	197	262	830	372	253	262	549	893	663	617	717	556	ANGEL1
342	ENSG00000013561	1041	1078	1507	890	1456	836	728	1238	1046	1294	793	558	776	1366	1207	1178	610	930	1115	1058	820	1078	1381	874	1431	752	2041	1229	976	RNF14
343	ENSG00000013563	249	121	253	135	249	204	177	256	296	444	285	183	146	258	378	55	66	61	75	242	158	171	301	304	200	126	339	234	208	DNASE1L1
344	ENSG00000013573	694	404	883	414	1306	694	465	853	961	2124	1157	896	869	1448	1131	456	209	249	440	1582	709	70	436	567	367	612	540	832	638	DDX11
345	ENSG00000013583	501	415	788	456	686	372	320	468	438	712	599	554	522	511	624	203	182	205	207	516	469	705	783	574	734	384	531	477	521	HEBP1
346	ENSG00000013588	948	360	681	490	570	54	254	83	273	813	245	306	1420	865	2796	72	149	116	161	724	1578	1090	702	39	1558	564	35	426	357	GPRC5A
347	ENSG00000013619	98	311	320	178	144	110	128	193	191	245	184	110	112	89	254	49	19	40	37	216	242	89	131	140	270	232	299	127	188	MAMLD1
348	ENSG00000013725	48	45	667	338	108	386	307	213	232	1209	499	572	139	239	787	32	22	13	35	85	33	130	559	1228	141	50	178	348	181	CD6
349	ENSG00000013810	1045	666	748	419	2003	580	308	671	1044	1485	949	856	585	1455	1256	141	96	87	96	1001	341	337	670	781	736	607	726	961	393	TACC3
350	ENSG00000014123	1963	1696	2785	1554	1652	1562	1165	2022	2110	2352	2159	1089	1533	2016	2339	2328	1046	1836	1874	2280	1658	663	1684	1839	2609	1586	2177	1845	1813	UFL1
351	ENSG00000014138	555	427	829	412	839	494	359	658	874	1253	436	906	383	688	769	257	147	187	282	981	237	170	428	488	506	399	534	498	333	POLA2
352	ENSG00000014164	753	474	963	480	1452	554	374	680	873	1457	1282	830	904	764	1109	81	77	70	93	735	512	413	446	465	725	932	946	710	592	ZC3H3
353	ENSG00000014216	13314	5766	12342	6140	9606	7426	4682	6963	14086	15021	11451	5736	11441	16049	12597	1257	926	757	802	8070	6404	7680	7498	6163	9318	6612	9992	7700	7305	CAPN1
354	ENSG00000014257	1578	1293	1583	963	2320	2895	2071	2704	4491	2381	2988	474	1397	2873	2912	2020	1097	1064	1945	1685	2307	1233	1402	1817	3402	1786	4395	1661	1972	ACPP
355	ENSG00000014641	2917	2489	3274	1693	4155	2290	1697	3407	2956	3673	2408	2599	2446	3488	3090	2136	1098	1507	1669	3260	2713	2814	4661	3708	4062	2617	9971	2581	2453	MDH1
356	ENSG00000014824	2295	2032	2729	1543	2319	1560	1104	2095	2422	2862	2149	1514	2007	2342	2541	2378	1007	1882	2054	2453	2310	1677	2658	2340	3272	1959	3343	2341	2103	SLC30A9
357	ENSG00000014914	374	868	428	260	597	505	559	661	661	574	657	567	310	350	614	443	266	279	378	474	395	260	269	263	362	299	212	271	388	MTMR11
358	ENSG00000014919	765	936	1226	673	1313	947	785	1247	1174	1163	892	621	614	1311	1146	894	546	781	937	1034	577	540	559	877	1393	872	1544	749	761	COX15
359	ENSG00000015133	1129	647	2958	1453	3153	1090	949	1674	1438	2421	2686	2403	1541	1642	3631	266	283	334	302	2362	954	384	717	2292	1451	1805	1739	2904	1384	CCDC88C
360	ENSG00000015153	367	329	779	343	406	354	284	381	425	528	514	253	375	421	464	871	318	755	872	486	550	390	575	518	592	418	528	442	477	YAF2
361	ENSG00000015171	2122	3181	3960	2130	3114	2205	1741	3127	3049	3239	3574	2125	1719	1872	3125	2643	1471	2252	2768	2980	2475	1175	2230	2745	3733	2314	3184	2671	3089	ZMYND11
362	ENSG00000015285	101	73	583	321	137	311	196	152	266	1077	318	298	135	255	715	17	34	26	26	102	35	387	452	716	137	57	145	301	168	WAS
363	ENSG00000015413	2	13	25	17	22	8	15	12	5	5	28	52	7	4	51	15	5	2	1	12	8	40	28	18	10	0	5	9	39	DPEP1
364	ENSG00000015475	359	571	596	337	885	385	276	431	435	836	479	324	429	674	755	235	128	194	214	416	357	738	839	757	631	616	1324	400	507	BID
365	ENSG00000015479	5954	8836	9667	5244	12385	6142	4315	7942	7322	10196	8167	6815	5150	8514	9176	8313	4079	7479	7771	8127	5811	3679	5795	6844	9749	6587	9758	7816	7416	MATR3
366	ENSG00000015520	9	15	5	3	8	31	11	23	34	21	19	7	5	19	9	4	5	2	3	8	5	23	22	17	51	38	141	13	7	NPC1L1
367	ENSG00000015532	690	1151	840	500	1438	726	523	1216	1124	1201	1113	462	723	614	1115	330	289	247	284	1101	453	315	439	571	862	729	995	995	786	XYLT2
368	ENSG00000015568	2	8	10	1	8	3	2	4	4	7	5	3	9	4	2	13	18	14	14	8	11	1	3	6	6	1	8	3	7	RGPD5
369	ENSG00000015592	0	2	3	1	2	1	2	1	0	1	2	8	1	1	0	1	3	0	6	0	9	1	1	2	0	2	1	1	3	STMN4
370	ENSG00000015676	2666	2006	4148	2145	5271	2086	1725	2933	3537	4555	2808	2018	1988	2963	3289	1428	941	1111	1311	3207	1876	1366	1689	2103	3173	2494	3348	2365	2600	NUDCD3
371	ENSG00000016082	20	2	280	66	102	31	1	37	3	33	156	11	6	13	29	53	6	2	10	3	8	0	1	51	3	1	6	6	1	ISL1
372	ENSG00000016391	38	50	168	100	243	84	55	136	80	77	49	118	45	45	79	69	105	51	99	182	51	20	105	92	138	227	448	84	74	CHDH
373	ENSG00000016402	774	423	1319	743	1663	876	880	1561	1392	924	1171	2447	843	1021	1714	1403	771	636	751	1040	1964	723	1750	1922	2510	1066	3870	951	1072	IL20RA
374	ENSG00000016490	0	1	0	1	0	0	0	0	0	0	0	4	1	0	1	1	2	2	2	1	0	0	0	0	0	0	1	1	0	CLCA1
375	ENSG00000016602	61	214	267	169	502	426	758	901	310	279	425	107	180	595	593	562	211	693	437	307	285	211	142	1284	1411	464	213	438	302	CLCA4
376	ENSG00000016864	669	1316	1466	806	1366	848	609	996	894	1306	1096	604	562	1382	1250	923	709	849	972	1043	734	669	1010	800	932	586	967	680	1036	GLT8D1
377	ENSG00000017260	3826	3647	5572	3335	6066	3501	3146	4362	6415	5177	4604	3196	3962	4590	7425	3645	1781	2896	3311	4046	3693	2563	2592	3901	6318	5216	5768	4965	4204	ATP2C1
378	ENSG00000017373	260	219	183	90	677	403	340	532	698	635	333	210	133	1142	666	98	51	84	75	345	305	54	106	330	561	232	689	204	269	SRCIN1
379	ENSG00000017427	23	269	1530	737	468	366	243	184	322	460	670	222	111	99	547	420	197	518	742	276	103	711	425	375	675	140	303	538	867	IGF1
380	ENSG00000017483	1773	1992	824	438	934	855	1069	1877	1738	939	406	529	1774	536	944	143	94	107	114	1713	1683	836	598	281	407	1261	371	1474	1116	SLC38A5
381	ENSG00000017621	53	36	62	37	111	54	48	66	116	89	65	53	54	88	109	53	21	40	38	98	52	35	49	78	57	37	96	52	44	MAGIX
382	ENSG00000017797	6362	2758	7066	3847	8072	3474	2665	4659	6786	5469	7089	2325	3713	5717	5551	2907	2299	2418	2693	6306	4239	3147	3736	3234	5358	3907	4898	5383	4296	RALBP1
383	ENSG00000018189	2002	1568	1915	1327	1798	1440	1182	1694	1866	2131	1643	1123	841	1685	1973	3536	1780	2976	3378	2172	1793	415	1475	1457	2514	1114	2072	1908	1796	RUFY3
384	ENSG00000018236	1262	1161	3190	1592	2870	1235	973	1624	1785	2607	4490	554	1457	3824	2356	3774	1958	2206	2880	2266	1514	842	456	2624	1928	1220	1168	2440	2543	CNTN1
385	ENSG00000018280	179	69	107	76	119	60	39	28	258	876	94	60	206	95	146	24	25	17	28	117	55	174	102	40	39	41	141	154	159	SLC11A1
386	ENSG00000018408	2269	2325	3920	2364	2646	1847	1694	2090	2457	2548	3376	936	1607	1495	2882	1455	805	1230	1738	2111	2307	1651	1283	1382	3223	2384	1826	2162	3702	WWTR1
387	ENSG00000018510	2122	1293	2866	1561	2185	1266	919	1527	1947	2218	2396	826	1607	1633	1892	1579	696	1276	1471	2900	1271	804	1055	1168	2353	1273	1194	2151	2210	AGPS
388	ENSG00000018607	0	1	1	2	1	3	0	3	0	0	0	0	0	7	2	1	0	0	1	0	0	1	0	0	1	0	0	0	0	ZNF806
389	ENSG00000018610	579	581	968	450	1112	489	418	733	660	867	677	575	520	886	753	540	318	393	418	738	703	359	760	742	958	834	1078	683	567	CXorf56
390	ENSG00000018625	7	33	23	22	51	62	64	113	42	25	23	14	8	13	46	127	117	86	216	42	24	6	14	130	65	14	110	8	66	ATP1A2
391	ENSG00000018699	873	504	884	437	1420	482	272	716	787	1198	644	464	616	710	725	607	384	498	575	814	476	521	556	490	1001	772	654	597	610	TTC27
392	ENSG00000018869	22	88	43	37	84	36	33	47	43	62	30	24	17	18	58	67	43	81	86	25	41	34	108	94	63	23	26	43	48	ZNF582
393	ENSG00000019102	24	7	27	15	15	26	23	25	20	52	18	20	20	14	22	14	20	19	18	31	18	18	20	10	8	7	16	19	28	VSIG2
394	ENSG00000019144	1658	3203	2098	1059	1402	1352	791	1936	1500	1983	2603	1121	1012	1529	2340	1090	918	1019	1489	2039	935	286	530	771	1381	681	1502	1190	2234	PHLDB1
395	ENSG00000019169	91	52	68	39	22	84	35	34	92	183	45	61	93	151	51	155	443	216	198	26	23	76	114	52	91	62	97	26	167	MARCO
396	ENSG00000019186	218	59	71	125	302	277	1137	508	175	242	111	149	822	55	614	20	65	10	21	947	604	199	1400	213	548	1437	73	496	302	CYP24A1
397	ENSG00000019485	229	578	575	312	482	170	153	310	470	316	387	100	319	399	432	100	62	92	113	309	340	164	89	323	425	408	194	396	253	PRDM11
398	ENSG00000019505	26	89	92	27	87	5	10	247	21	5	5	112	4	2	10	4	17	16	21	325	15	3	0	7	3	401	2	338	37	SYT13
399	ENSG00000019549	3096	1289	3699	1967	2701	1221	1093	1713	1756	1836	2577	1016	2027	1052	1843	732	305	711	633	2867	2663	2774	1538	971	2690	2832	1399	2188	2553	SNAI2
400	ENSG00000019582	7407	7875	64725	33395	19563	24354	20181	13814	18425	92093	32630	30791	14237	21662	53719	4990	5316	4458	4016	8634	2787	43704	49507	58615	17281	5698	15498	27789	22466	CD74
401	ENSG00000019991	131	59	353	230	175	51	38	35	72	93	183	40	200	40	69	357	102	283	231	39	60	131	121	62	115	26	93	216	331	HGF
402	ENSG00000019995	2537	1894	3420	1572	2373	1646	1499	1947	3262	1961	4592	1391	1638	2337	2369	2739	1466	1770	2064	3477	3610	1577	909	1777	3497	3489	2285	2256	2287	ZRANB1
403	ENSG00000020129	855	546	1301	559	1196	482	411	940	972	737	819	367	668	418	731	118	75	70	74	1463	510	355	369	413	659	743	712	898	571	NCDN
404	ENSG00000020181	1088	1065	2103	1317	1086	1244	922	1052	1339	1941	2771	968	594	672	1837	422	287	360	293	603	203	557	544	1037	1013	440	778	905	2401	GPR124
405	ENSG00000020219	1	0	1	0	1	0	0	3	1	1	0	2	1	1	1	2	0	3	1	3	0	0	1	0	0	0	0	0	0	CCT8L1P
406	ENSG00000020256	614	594	921	426	1448	476	421	735	724	856	1580	440	545	879	855	323	216	266	333	845	429	461	634	697	1140	733	867	961	517	ZFP64
407	ENSG00000020426	334	197	278	125	300	167	85	293	185	273	199	218	253	212	281	402	182	320	350	238	227	175	198	235	335	259	424	263	230	MNAT1
408	ENSG00000020577	602	685	1001	615	647	318	237	217	284	1073	1569	358	412	295	858	1009	967	1056	1194	404	413	175	205	471	608	227	597	893	1466	SAMD4A
409	ENSG00000020633	498	322	1609	869	1471	673	555	502	684	2185	869	752	412	657	2049	96	114	102	103	523	508	444	875	1868	899	282	573	1418	1030	RUNX3
410	ENSG00000020922	435	638	780	417	950	575	411	826	654	593	579	921	355	886	767	1353	653	1125	1323	720	351	137	477	539	813	405	567	780	599	MRE11A
411	ENSG00000021300	9	10	51	27	22	25	17	9	11	41	24	60	11	9	62	51	72	50	66	2	4	22	38	68	20	4	68	19	24	PLEKHB1
412	ENSG00000021355	17680	1110	2974	1715	2253	2172	1201	1535	6601	9720	1363	1374	3888	2352	4094	677	506	563	696	1978	2891	11832	7892	2341	1844	2996	2586	4587	2505	SERPINB1
413	ENSG00000021461	1	0	1	2	2	2	2	2	1	0	4	3	1	2	2	12	10	7	13	2	3	1	3	5	1	0	2	0	1	CYP3A43
414	ENSG00000021488	0	5	6	2	1	3	3	4	5	5	2	4	5	18	8	5	10	0	3	1	2	1	3	7	3	1	7	1	5	SLC7A9
415	ENSG00000021574	704	1476	1466	820	1502	767	646	1022	1237	1124	1102	787	786	1101	1106	1142	416	881	964	1143	835	467	612	984	1309	1167	1235	915	1036	SPAST
416	ENSG00000021645	22	711	15	19	282	22	22	30	19	40	10	18	8	104	40	128	47	84	99	36	22	3	18	36	44	8	14	34	25	NRXN3
417	ENSG00000021762	1195	1053	1411	852	1669	980	837	1741	1300	2203	1488	648	791	2708	2111	500	358	340	378	1218	813	420	440	840	1093	652	1282	1180	1291	OSBPL5
418	ENSG00000021776	1936	1678	3455	1676	2570	1442	1051	2057	2521	2696	2218	1310	1500	2392	2735	2502	1422	2062	2346	2733	1733	903	1484	1507	2911	2227	2542	2350	1898	AQR
419	ENSG00000021826	183	109	559	240	87	79	128	120	154	87	41	49	52	166	274	324	138	224	246	121	327	54	278	167	148	47	239	198	147	CPS1
420	ENSG00000021852	0	0	0	0	0	1	0	2	1	2	0	0	0	0	1	1	0	0	0	0	0	0	0	1	4	9	0	0	0	C8B
421	ENSG00000022267	274	2254	1038	708	989	605	701	669	395	946	1885	727	354	396	950	2458	1956	2760	3512	287	253	378	451	615	687	534	426	527	1219	FHL1
422	ENSG00000022277	1986	1475	2572	1304	2576	1219	868	1624	1642	2159	2072	1528	1760	2123	2028	1019	755	757	808	1695	1583	1920	2419	1846	2917	1941	2259	1768	1619	RTFDC1
423	ENSG00000022355	0	5	0	0	0	0	0	0	1	2	0	1	0	0	0	0	0	0	0	0	0	0	1	0	0	0	0	2	0	GABRA1
424	ENSG00000022556	9	126	24	90	1293	732	285	1566	1860	805	416	72	610	405	207	86	116	64	269	324	562	1402	740	185	916	112	1296	302	210	NLRP2
425	ENSG00000022567	220	215	361	255	1088	740	503	678	665	1284	414	346	248	569	1336	347	172	219	224	422	267	593	425	813	1477	569	2536	378	677	SLC45A4
426	ENSG00000022840	5310	3964	8568	4247	5674	3618	2757	4945	7218	6002	5946	2713	4411	5698	6518	1260	836	937	1192	4899	4683	4309	4462	5509	5535	3775	6354	4349	4802	RNF10
427	ENSG00000022976	476	452	483	294	969	499	383	699	803	853	584	552	363	696	688	349	203	295	327	777	463	137	324	584	581	417	473	444	414	ZNF839
428	ENSG00000023041	1057	933	1375	724	1264	913	757	1216	1141	1847	1069	1302	918	1546	1422	766	453	701	786	1331	1179	663	958	1175	931	1156	1011	829	754	ZDHHC6
429	ENSG00000023171	99	150	253	129	101	82	47	81	75	264	113	127	57	68	201	78	93	54	87	89	17	31	81	143	57	35	42	144	83	GRAMD1B
430	ENSG00000023191	13278	3992	17168	8344	6634	5802	4075	7612	9742	11791	9616	3204	9355	8013	10348	1403	1184	962	979	9771	5887	8312	3681	5303	7104	6099	6798	7161	6829	RNH1
431	ENSG00000023228	2626	1693	3006	1593	3299	1884	1331	3016	3240	2647	3466	1480	2013	2865	3030	2787	1696	2168	2356	3443	2028	1510	2157	2510	4346	2069	7785	2631	2350	NDUFS1
432	ENSG00000023287	2175	2557	2931	1665	4550	1693	1425	2340	2753	2391	4553	1528	2587	2977	3448	5251	2441	4121	4444	2941	3396	993	1721	2075	4865	4514	3979	3181	2803	RB1CC1
433	ENSG00000023318	1810	919	1916	1055	2229	1462	1042	1609	2019	2819	1551	1076	2075	1730	2103	1286	737	1031	1171	1558	1427	1716	1563	1544	1765	1333	2047	1717	1632	ERP44
434	ENSG00000023330	2210	1070	2591	1343	1716	1517	847	1807	2051	2086	2431	572	2083	1648	1773	693	357	413	496	1714	1820	2149	1714	2006	2795	1691	6851	1515	1741	ALAS1
435	ENSG00000023445	215	418	2832	1385	825	975	790	588	416	4173	906	1323	360	656	2444	669	413	582	1427	284	179	601	3871	3403	794	204	704	2335	992	BIRC3
436	ENSG00000023516	1770	1886	3602	1776	2870	1256	1056	1459	1440	1944	1367	1069	1042	1788	2032	3354	1556	2864	3267	2104	1338	548	1188	1738	2966	1634	2397	2594	2699	AKAP11
437	ENSG00000023572	247	156	346	166	328	165	109	264	219	260	181	132	191	195	205	239	93	142	158	277	261	264	298	195	246	227	353	250	207	GLRX2
438	ENSG00000023608	271	200	314	201	295	206	155	258	269	263	277	158	330	185	215	171	120	172	167	368	419	187	204	239	239	262	186	353	211	SNAPC1
439	ENSG00000023697	1528	823	1464	829	964	615	567	995	919	1484	1020	901	1583	1238	1395	804	396	598	647	1239	1213	1546	2435	1164	1460	1052	1036	927	1034	DERA
440	ENSG00000023734	4672	2695	5762	2928	3185	2593	2125	4235	4683	5738	3873	2204	4227	4427	4341	1373	607	1021	999	3849	3518	4713	3651	3334	5064	4821	5833	3543	3567	STRAP
441	ENSG00000023839	117	36	116	95	143	110	65	105	99	127	137	108	71	212	183	162	76	112	137	199	163	9	186	78	126	41	100	191	78	ABCC2
442	ENSG00000023892	871	600	1734	903	1488	1118	870	1454	1410	2547	1921	1039	1073	1794	2581	343	290	238	345	1712	1056	875	1241	1878	1285	1203	1162	1358	938	DEF6
443	ENSG00000023902	418	864	993	509	473	406	281	245	373	1310	719	595	241	388	827	206	196	163	203	250	243	547	908	1063	434	300	344	534	572	PLEKHO1
444	ENSG00000023909	595	587	939	427	971	533	371	699	693	931	671	299	556	747	721	434	139	266	434	610	514	693	701	754	1463	733	2039	529	922	GCLM
445	ENSG00000024048	1601	2041	2974	1667	3393	1472	1272	1977	1633	2131	2041	1420	1611	3111	3339	3492	2072	2962	3654	2423	1652	673	1669	2220	3100	2018	2376	2353	2088	UBR2
446	ENSG00000024422	3733	2062	4403	2360	2796	2189	2015	3685	4230	3946	4661	1619	3034	1271	4568	170	150	149	156	2691	1476	2897	852	875	2548	2682	1095	4549	2785	EHD2
447	ENSG00000024526	284	308	276	136	1490	192	133	326	361	411	284	323	269	641	454	468	54	152	163	396	104	113	397	348	392	386	379	237	99	DEPDC1
448	ENSG00000024862	196	400	418	194	284	222	194	255	204	368	293	341	244	366	403	282	202	205	229	228	267	242	588	462	428	288	322	259	266	CCDC28A
449	ENSG00000025039	550	176	1114	526	579	445	391	268	716	725	402	503	262	354	549	730	572	817	782	482	568	499	560	655	514	250	522	517	266	RRAGD
450	ENSG00000025156	439	761	630	361	534	381	260	492	410	683	735	509	396	500	586	606	282	572	488	540	732	167	464	583	630	422	434	499	576	HSF2
451	ENSG00000025293	1003	1302	1996	1041	2121	859	663	1080	1136	1420	1496	910	790	1298	1425	1086	738	875	1056	1193	960	489	749	1054	1488	1080	1599	1650	1241	PHF20
452	ENSG00000025423	37	69	181	58	111	101	48	157	121	51	177	73	122	19	111	30	7	12	12	206	80	41	85	140	81	168	37	66	57	HSD17B6
453	ENSG00000025434	148	138	306	168	203	343	179	404	162	425	202	145	167	214	248	204	120	141	164	177	92	213	454	557	587	143	2074	167	248	NR1H3
454	ENSG00000025708	14655	1698	5511	2750	5547	4108	1699	3325	4695	14696	5611	4388	6180	2373	8620	223	138	126	259	6304	3186	3921	5624	5755	4896	3544	3318	7894	3814	TYMP
455	ENSG00000025770	1169	1102	1300	680	2699	882	662	1240	1439	2398	1509	1354	878	2079	1800	380	266	293	303	1840	941	823	936	1012	1253	1292	1399	960	935	NCAPH2
456	ENSG00000025772	805	589	1258	552	981	520	325	724	803	1025	733	452	722	690	761	197	132	163	177	876	404	842	676	766	725	763	1084	713	558	TOMM34
457	ENSG00000025796	3539	4373	4667	2634	3415	2944	2044	3700	4218	4992	4000	2336	2598	3300	4135	1406	685	1239	1577	3536	2347	1843	2368	2882	4416	3735	4389	3533	3560	SEC63
458	ENSG00000025800	2903	2417	3864	2153	4810	2142	1582	2824	3765	3265	3217	1477	2040	2726	3407	1920	1364	1501	1732	3278	2287	1279	1567	2336	3240	2927	4308	3352	2474	KPNA6
459	ENSG00000026025	5449	5950	13222	8435	5168	6018	5283	4430	5140	11569	7855	6884	2942	4719	9614	8086	7447	7655	5239	2985	1928	7841	9507	9760	5094	1672	3480	5092	10463	VIM
460	ENSG00000026036	94	80	70	40	104	121	61	134	152	287	227	145	37	184	227	41	27	26	36	196	65	6	18	81	97	67	66	61	77	RTEL1-TNFRSF6B
461	ENSG00000026103	711	239	1452	864	746	613	480	586	615	1414	816	714	526	281	1002	834	342	543	659	1040	954	574	1171	1083	846	425	749	898	1018	FAS
462	ENSG00000026297	167	375	669	364	374	651	373	675	629	1498	737	522	281	602	747	227	211	174	233	431	176	374	824	858	553	348	1580	296	349	RNASET2
463	ENSG00000026508	27986	20623	42676	25383	41135	24713	23336	34352	39241	45286	38529	12180	25976	19006	50197	17454	12966	15412	21126	29686	26874	26455	16412	24430	39556	26528	22084	35726	30596	CD44
464	ENSG00000026559	26	41	9	8	189	7	7	7	9	77	8	45	22	99	42	0	0	3	1	12	11	8	2	2	22	15	15	18	6	KCNG1
465	ENSG00000026652	381	1053	1014	522	198	270	163	644	338	502	418	196	452	225	478	434	369	288	466	212	233	173	171	324	482	386	276	514	470	AGPAT4
466	ENSG00000026751	1314	142	1597	714	427	893	720	709	834	1389	925	613	1020	554	2298	55	50	37	89	600	401	641	1097	1169	540	458	225	1008	726	SLAMF7
467	ENSG00000026950	349	652	1088	569	1263	1007	1219	724	783	2552	1235	1774	626	1146	2952	777	602	671	894	680	200	200	2220	2287	740	414	254	816	661	BTN3A1
468	ENSG00000027001	769	887	1571	754	1282	773	633	1139	1293	1107	712	563	532	1037	866	1213	487	617	1020	1113	835	524	946	600	1272	505	1518	821	937	MIPEP
469	ENSG00000027075	1664	1127	1985	1006	1280	1244	868	1214	1937	2281	2178	1043	1560	1389	2395	1307	979	967	1336	1759	1538	1462	1307	1977	1884	1946	2170	1425	1395	PRKCH
470	ENSG00000027644	1	2	4	2	7	3	1	6	5	7	10	6	7	9	3	1	1	3	3	6	3	2	0	0	2	4	6	10	6	INSRR
471	ENSG00000027697	5184	2420	7738	4493	4604	4100	2992	3944	5331	6833	4571	4254	6602	4380	7068	2522	1716	1906	2475	3919	6139	5043	7102	7371	8191	4384	6524	5459	5059	IFNGR1
472	ENSG00000027847	700	475	706	425	775	405	302	502	723	1027	673	510	441	721	936	153	117	104	162	713	428	550	798	467	748	513	578	609	525	B4GALT7
473	ENSG00000027869	316	28	250	114	112	103	96	107	117	577	114	203	193	88	299	6	5	10	11	83	50	589	214	258	41	94	80	263	130	SH2D2A
474	ENSG00000028116	667	352	870	401	616	496	272	547	627	972	773	639	611	625	797	567	279	468	530	665	423	522	757	615	728	575	667	592	463	VRK2
475	ENSG00000028137	601	288	3116	1678	814	934	705	492	820	4926	1398	794	466	752	2218	191	235	177	198	516	240	995	1006	2092	801	354	1576	1633	1262	TNFRSF1B
476	ENSG00000028203	2279	1998	3072	1718	2736	1497	1148	1949	2169	2522	2247	1215	1756	2679	2960	2153	983	1790	1984	2428	2335	1873	2219	2381	2183	1759	2412	1989	2083	VEZT
477	ENSG00000028277	81	108	326	185	87	240	180	130	178	742	266	174	114	202	776	47	43	34	40	75	37	119	208	373	148	59	175	272	160	POU2F2
478	ENSG00000028310	1472	1085	1523	809	1523	1039	756	1356	1446	1909	2032	1562	978	2415	1825	612	514	628	638	2029	1504	474	815	1407	1251	1255	1187	1195	1226	BRD9
479	ENSG00000028528	3088	3148	5063	2855	5342	2899	2244	3470	3801	3925	3337	2258	2455	3666	4885	2443	1948	2477	2809	5003	3424	2107	4041	3177	3901	2616	3655	3734	3816	SNX1
480	ENSG00000028839	284	360	527	252	375	249	196	377	330	419	310	312	373	372	382	331	145	276	296	322	299	357	534	424	396	369	301	318	299	TBPL1
481	ENSG00000029153	5159	901	2353	1397	956	1481	1045	1762	3673	3163	2290	1127	3055	3013	4549	1283	629	893	1137	2299	2454	2468	2125	1348	2933	2455	1263	2056	1859	ARNTL2
482	ENSG00000029363	5601	6156	7888	4083	6579	4874	3764	6289	6945	7840	6921	5029	4153	6799	7838	7744	3702	6358	6778	6830	5430	1813	4553	5399	8777	5264	7386	6670	6884	BCLAF1
483	ENSG00000029364	1985	2967	3589	1858	4297	2149	1653	3231	3042	3379	3237	1916	2338	3758	3562	2384	1373	1751	2007	2990	2032	1821	1535	2785	3369	2333	5270	3212	2597	SLC39A9
484	ENSG00000029534	45	41	85	34	52	50	58	55	39	89	52	88	17	18	79	15	13	27	18	40	10	21	33	66	70	94	73	81	45	ANK1
485	ENSG00000029559	0	0	5	3	6	1	2	0	0	1	0	6	0	1	0	9	0	1	0	0	0	0	0	10	1	2	1	5	1	IBSP
486	ENSG00000029639	212	204	298	146	278	227	159	318	289	270	100	195	145	231	299	301	216	262	271	278	124	171	362	253	262	172	300	216	198	TFB1M
487	ENSG00000029725	1431	1353	2072	1181	2198	1233	935	1693	1681	1697	1679	1090	844	1069	1646	1843	1210	1558	1766	1687	1408	645	1088	1492	1531	865	1684	1388	1623	RABEP1
488	ENSG00000029993	1256	1835	1220	643	2430	634	645	853	1175	1510	1106	761	782	1438	1466	419	163	221	282	1120	705	895	716	1179	1274	1141	1597	1186	822	HMGB3
489	ENSG00000030066	2031	2193	2596	1531	3544	1955	1157	2542	3056	3282	2169	1332	1984	3018	3120	1706	1089	1331	1570	3451	1380	913	945	1738	2580	2714	2343	2546	2135	NUP160
490	ENSG00000030110	1799	676	2039	1165	1844	1236	1287	1625	2203	2172	1031	706	1525	1069	1596	203	179	124	142	1763	1446	1726	1973	1487	1068	1513	1646	1827	1021	BAK1
491	ENSG00000030304	1	1	6	4	3	3	3	3	0	9	6	5	1	1	5	104	75	126	146	1	0	1	14	9	4	4	0	2	1	MUSK
492	ENSG00000030419	850	412	1305	699	900	480	398	408	683	930	733	470	535	553	738	2825	935	1431	1654	763	340	216	1173	898	1047	643	642	918	619	IKZF2
493	ENSG00000030582	11960	5001	17413	9482	13325	8806	6218	8963	13792	18454	16235	7235	10546	9854	13191	1350	1099	876	681	8847	7788	10176	5547	8908	12403	7857	11590	14491	10389	GRN
494	ENSG00000031003	703	1098	1796	940	1802	974	699	1312	1429	1408	1051	567	651	1497	1344	1385	789	1222	1550	887	874	383	1099	885	1486	806	1051	1111	1224	FAM13B
495	ENSG00000031081	662	747	2491	1371	1333	783	703	766	912	2061	929	516	378	635	1468	1038	997	1173	1510	770	559	606	638	1069	1078	474	1057	1226	1633	ARHGAP31
496	ENSG00000031544	2	5	1	2	2	5	0	11	4	3	5	10	4	6	8	13	7	10	10	6	1	0	2	2	3	4	3	4	3	NR2E3
497	ENSG00000031691	186	262	338	138	410	119	89	169	165	228	221	246	300	386	266	172	41	132	175	300	177	188	329	237	188	272	130	230	160	CENPQ
498	ENSG00000031698	5233	3289	6261	3129	6944	3369	2319	4403	5508	5327	4688	2288	3560	4731	5305	2886	2062	1940	2035	4845	3864	5170	3653	3381	4694	4050	5708	4313	4164	SARS
499	ENSG00000031823	1711	1511	2186	1151	2361	1251	942	1829	2038	2896	2122	1537	1281	2126	2330	480	383	345	445	2036	1309	961	1405	1704	1776	1487	1828	1503	1575	RANBP3
500	ENSG00000032219	607	777	1011	602	1110	729	608	886	836	1118	1003	772	553	1165	1267	1684	949	1591	1754	1091	786	149	479	950	1068	721	985	978	873	ARID4A
501	ENSG00000032389	762	517	802	360	729	378	240	524	620	729	670	696	682	595	606	223	158	183	232	713	424	668	806	604	789	695	579	478	470	TSSC1
502	ENSG00000032444	1545	1082	2145	1046	1436	1279	961	1634	2227	2497	1779	1009	1030	1510	1992	215	138	142	160	1466	896	707	763	1153	1769	1100	1451	1533	1259	PNPLA6
503	ENSG00000032742	311	483	435	201	321	304	234	490	435	357	248	253	166	392	329	515	260	543	501	326	314	122	258	299	294	173	175	220	256	IFT88
504	ENSG00000033011	457	242	754	319	532	274	216	445	485	671	539	328	322	404	436	151	109	115	112	510	251	400	335	378	520	399	617	419	354	ALG1
505	ENSG00000033030	831	963	1429	729	1114	1026	785	1222	1299	1744	965	1100	1080	1648	1701	957	548	846	979	1364	1055	428	910	1012	1137	902	1199	917	912	ZCCHC8
506	ENSG00000033050	2412	1658	3497	1811	2705	1846	1298	2552	3250	3854	2540	2252	2137	2820	3069	974	569	646	672	2925	1786	1677	1545	1732	2196	2641	2848	2192	1986	ABCF2
507	ENSG00000033100	1465	1131	2252	1147	1556	1226	1083	1577	1790	2443	1930	1155	1066	1728	1908	397	292	334	417	1545	1165	746	793	1219	1556	1419	1657	1549	1429	CHPF2
508	ENSG00000033122	37	41	57	42	75	63	29	41	96	64	56	355	18	38	59	116	51	105	123	46	33	5	33	152	60	27	46	31	74	LRRC7
509	ENSG00000033170	337	584	818	449	1070	393	211	337	360	532	544	429	238	271	741	569	398	460	680	323	174	452	402	512	404	195	157	451	552	FUT8
510	ENSG00000033178	3675	1711	3032	1858	3423	2527	1651	3443	3489	3656	2656	1900	2754	1832	3047	2599	1090	1985	2601	3367	2991	1716	3673	2377	3191	2943	3305	2749	2198	UBA6
511	ENSG00000033327	900	749	2061	1028	721	522	508	686	919	1398	1428	738	718	646	1141	808	752	673	762	1094	1036	382	462	1009	1195	715	963	839	1312	GAB2
512	ENSG00000033627	2267	1738	4536	2037	2520	2509	1768	2718	4002	2593	3765	1214	2462	3037	3414	1537	936	1253	1409	3264	2245	1068	1091	1507	2898	2041	3507	2354	2487	ATP6V0A1
513	ENSG00000033800	835	797	1627	826	1388	758	552	1080	1158	1117	1158	621	839	1011	1202	1335	747	1086	1312	1298	1036	538	1011	1064	1233	966	1168	1220	1078	PIAS1
514	ENSG00000033867	913	652	2472	1408	850	859	557	985	1223	1185	1314	735	639	687	1500	1571	899	1565	1782	2839	1308	506	1059	1171	1019	863	1040	1474	1213	SLC4A7
515	ENSG00000034053	156	294	152	87	668	103	175	204	241	523	165	294	171	69	343	101	29	83	58	170	202	142	170	330	178	63	363	311	200	APBA2
516	ENSG00000034063	1177	601	878	360	1898	475	240	765	953	2219	845	1815	550	1752	1120	100	30	54	49	1199	260	157	237	343	495	880	488	706	428	UHRF1
517	ENSG00000034152	2677	1078	3298	1616	2494	1790	1375	1867	3429	2528	2849	948	1344	1841	2725	498	271	249	262	3028	2347	2393	2009	2233	3125	2152	5328	2159	2389	MAP2K3
518	ENSG00000034239	58	123	129	69	83	41	24	69	64	68	161	32	144	88	85	120	50	78	103	375	151	28	26	23	203	265	88	38	114	EFCAB1
519	ENSG00000034510	20119	7903	15691	7708	6833	5083	4684	4575	8197	18795	6977	9314	10451	6220	8864	3770	2751	2815	3784	7820	9399	29826	18987	13118	8558	12615	9187	10061	9364	TMSB10
520	ENSG00000034533	136	254	352	167	416	174	134	233	228	342	250	198	183	260	329	338	213	299	285	244	187	134	252	241	174	381	218	213	164	ASTE1
521	ENSG00000034677	2914	1485	5805	2513	3174	1889	1696	2202	2555	3119	5622	2711	2352	1680	3354	4028	1951	2694	3236	2826	3396	703	2373	2018	3628	2674	2692	3193	4062	RNF19A
522	ENSG00000034693	805	438	1098	575	685	702	424	1077	939	1033	717	839	715	771	742	852	372	626	671	992	790	572	1006	1090	1036	731	2442	797	702	PEX3
523	ENSG00000034713	2355	1442	2495	1427	2020	1879	1481	1989	2537	1897	1551	1217	1847	2075	2183	1703	797	1040	1277	2530	2961	3073	3197	2376	3294	2069	3112	2240	2217	GABARAPL2
524	ENSG00000034971	0	0	0	0	8	2	2	2	0	3	3	2	0	0	1	57	88	89	64	0	0	0	0	4	1	0	3	0	5	MYOC
525	ENSG00000035115	1177	1622	1961	1189	2728	917	787	1209	1067	2120	1073	1533	938	2184	2065	1587	1227	1857	2383	1472	1243	1469	1837	1478	2237	1436	1837	1456	1509	SH3YL1
526	ENSG00000035141	1620	629	1463	762	1374	871	700	1084	1405	1798	1124	975	1278	1235	1637	447	277	412	346	1367	1037	1254	1389	1102	1138	1283	1203	905	887	FAM136A
527	ENSG00000035403	6467	6806	8131	4312	6204	3071	2781	4489	5669	6509	7857	4196	4138	4848	7262	2681	1831	2244	3272	5584	4021	2513	1056	2366	6643	3686	4259	4176	5872	VCL
528	ENSG00000035499	433	208	211	98	766	227	88	294	461	277	232	237	196	470	244	169	41	69	70	319	151	133	265	140	333	433	247	298	117	DEPDC1B
529	ENSG00000035664	723	422	1047	653	1229	710	505	1183	891	680	1263	835	484	386	779	397	201	199	379	793	805	396	774	874	1890	1399	2912	959	858	DAPK2
530	ENSG00000035681	1316	1224	2276	1143	2892	1231	1013	1553	1524	2571	2260	966	1452	1747	2150	1668	1040	1512	1678	1597	1514	1004	1729	1570	2171	1825	2042	2100	1521	NSMAF
531	ENSG00000035687	1482	2282	2403	1225	2784	1237	1120	1905	1902	2320	2056	2091	1522	1946	2649	1543	858	1326	1286	2205	1557	1210	1805	1665	1950	1672	1666	2168	1581	ADSS
532	ENSG00000035720	0	16	38	24	10	31	17	12	13	46	17	19	14	17	71	6	11	6	8	9	3	21	83	67	13	4	4	24	26	STAP1
533	ENSG00000035862	3673	6133	12085	7310	4227	4088	3450	3220	3675	7167	8521	3313	2870	2561	5176	1732	1391	1748	1165	2727	984	2054	1582	2703	5451	2152	3291	4066	11515	TIMP2
534	ENSG00000035928	1469	1829	2376	1297	3077	1543	1006	2364	1860	2578	1799	2153	1260	2379	2622	2471	1297	1794	2074	2456	1247	696	1415	2561	2570	1848	3107	1865	1484	RFC1
535	ENSG00000036054	2104	1435	2666	1508	2894	1901	1250	2027	2960	2435	2665	1271	1876	2464	2613	2812	1044	1984	2045	3931	2958	1459	1853	1924	2435	2130	2643	2160	2169	TBC1D23
536	ENSG00000036257	3882	3379	5032	2736	4433	3377	2550	4219	4826	4186	5380	1362	2856	4762	4328	3717	1716	2825	3184	4657	4524	2467	2905	3627	6096	4033	5583	4135	4293	CUL3
537	ENSG00000036448	53	44	43	38	124	34	43	76	45	46	27	13	41	89	75	90	75	22	146	80	52	10	45	14	78	72	27	28	52	MYOM2
538	ENSG00000036473	0	0	0	0	0	0	0	0	0	0	0	0	0	0	0	2	0	1	1	0	0	0	0	1	1	0	0	0	0	OTC
539	ENSG00000036530	24	43	41	14	52	24	29	27	34	28	28	53	13	105	71	46	29	33	57	19	11	13	21	36	41	11	19	27	17	CYP46A1
540	ENSG00000036549	1156	1376	2439	1165	3212	1284	1017	1782	1714	1791	1549	1192	1164	2051	2226	3013	1577	2658	2516	1857	1443	574	1503	1669	2083	1626	1954	1378	1387	ZZZ3
541	ENSG00000036565	0	0	3	3	1	6	4	2	3	8	3	1	2	6	11	4	0	0	1	1	0	3	5	5	6	1	1	1	4	SLC18A1
542	ENSG00000036672	1414	381	1459	625	554	840	614	1136	2449	636	1960	510	1393	968	1051	316	123	143	114	1648	1815	1007	313	627	1667	1134	2720	993	1550	USP2
543	ENSG00000036828	1	1	1	2	1	0	0	1	1	2	7	4	2	2	5	0	1	0	1	0	2	0	4	1	2	1	1	0	1	CASR
544	ENSG00000037042	517	525	785	423	476	768	450	1066	891	775	2050	457	596	569	933	123	111	108	134	922	749	241	510	1176	563	749	348	479	439	TUBG2
545	ENSG00000037241	715	289	580	263	529	303	196	497	510	533	365	469	451	490	447	154	87	115	115	603	420	868	960	477	700	537	695	515	384	RPL26L1
546	ENSG00000037280	177	130	233	99	303	263	205	298	296	407	176	138	110	179	246	77	126	78	96	161	63	136	120	233	115	126	112	309	279	FLT4
547	ENSG00000037474	3844	2280	5015	2287	3694	3152	1891	4120	4453	4606	3716	1885	3134	4815	4258	1705	963	1226	1475	4320	3726	1807	2457	4029	4284	3840	6879	3478	3052	NSUN2
548	ENSG00000037637	1599	1384	2076	1047	2075	1201	925	1515	1845	1793	2301	882	1140	2090	2207	1498	950	1070	1335	1829	1473	1068	1085	1325	2328	1476	1932	1496	1621	FBXO42
549	ENSG00000037749	1510	1325	2290	1204	1845	1426	870	1755	1910	1577	1494	811	1134	1612	1538	1443	822	1066	1131	1773	1195	1075	1112	1054	1550	1617	2398	1898	1792	MFAP3
550	ENSG00000037757	494	381	562	249	797	477	422	739	699	708	513	432	339	439	572	203	181	188	146	878	396	108	552	560	574	603	688	592	502	MRI1
551	ENSG00000037897	399	295	474	243	448	261	158	366	423	501	286	344	321	379	460	75	50	69	59	414	398	331	298	323	347	322	359	335	288	METTL1
552	ENSG00000037965	111	102	142	74	107	36	40	52	105	200	84	105	63	55	151	41	27	35	84	75	68	25	6	40	17	95	1	74	75	HOXC8
553	ENSG00000038002	759	572	1439	748	986	592	417	633	611	900	1019	502	649	843	1058	971	311	553	699	995	928	662	977	1175	1123	482	1486	992	651	AGA
554	ENSG00000038210	1524	856	1623	1047	2073	1027	694	1231	1416	2160	1790	1311	1392	1937	2302	1471	480	1159	1202	1992	1675	846	1635	1471	1762	1286	1291	1945	1360	PI4K2B
555	ENSG00000038219	2088	2620	3567	1835	3052	1321	984	1693	1543	2380	2670	1716	1419	2693	2901	5168	3289	4431	5259	3585	2217	469	1241	2320	4356	2704	3012	3450	3214	BOD1L1
556	ENSG00000038274	1231	2162	2461	1384	2582	1423	1005	1831	1522	2204	1729	1482	1628	3399	2255	1178	644	1030	1084	1969	1157	1775	3580	1975	2795	1589	1731	1960	1557	MAT2B
557	ENSG00000038295	98	392	276	193	123	99	82	92	31	69	50	28	29	33	116	652	297	446	433	115	208	64	60	82	116	49	129	587	224	TLL1
558	ENSG00000038358	1019	999	1602	807	1563	1129	974	1618	1795	2273	1574	1101	966	1436	1864	394	318	305	369	1640	1014	330	590	1155	1607	1084	1648	1107	1030	EDC4
559	ENSG00000038382	3612	2942	4439	2189	3733	1357	1013	1787	1825	2198	3938	1503	1853	1730	2873	2824	2304	2607	3244	3894	2788	542	866	2171	3787	3282	2902	3346	3001	TRIO
560	ENSG00000038427	1243	14732	9435	5026	2807	2031	1049	1338	2529	6198	3520	1377	900	1137	4846	7562	8225	5838	8748	1384	548	1923	2126	1181	1325	1151	1451	4073	6393	VCAN
561	ENSG00000038532	1216	1180	2147	1057	1573	1093	912	1459	1883	1738	1591	876	1041	1484	1516	595	382	452	693	1663	792	592	754	945	1457	1015	1789	1217	1333	CLEC16A
562	ENSG00000038945	96	131	663	442	382	190	133	99	179	770	227	245	321	168	317	280	383	236	510	167	38	415	394	375	217	81	370	368	916	MSR1
563	ENSG00000039068	12324	8630	15317	8442	15840	8999	7143	10895	17137	14906	12465	5957	9805	9205	11818	4722	2430	3158	4712	10863	7088	4659	4803	5955	12880	7708	15177	9049	10346	CDH1
564	ENSG00000039123	2257	1494	2414	1296	2656	1894	1181	2628	2467	2723	1663	1246	1647	2129	2393	2434	1254	1798	2051	2703	1455	978	1378	1265	2424	2013	2610	2306	1968	SKIV2L2
565	ENSG00000039139	14	18	18	9	37	5	6	14	12	33	17	47	23	4	45	85	133	67	78	20	9	20	17	15	20	130	15	13	14	DNAH5
566	ENSG00000039319	1438	1343	1767	916	1483	1284	1094	1419	1626	1476	1234	821	974	1961	1693	3192	1141	2443	2831	1907	1131	520	1275	991	1886	1305	1668	1594	1766	ZFYVE16
567	ENSG00000039523	910	530	1153	636	687	654	537	764	890	1549	892	514	573	592	1252	136	101	106	124	684	704	481	545	843	857	549	553	697	975	FAM65A
568	ENSG00000039537	1	1	5	2	13	4	4	1	1	1	8	6	0	1	4	75	86	39	70	0	1	0	2	18	4	1	1	3	8	C6
569	ENSG00000039560	641	1526	1955	1044	1103	767	719	949	820	1713	1194	596	904	631	1164	1905	918	1962	1534	638	571	829	720	1300	1539	1208	1322	993	1748	RAI14
570	ENSG00000039600	3	7	10	3	66	56	10	14	6	15	2	89	12	41	18	1	2	2	4	6	1	4	9	5	7	0	4	2	3	SOX30
571	ENSG00000039650	763	537	610	302	883	754	527	1056	1170	1749	1099	946	492	1223	1461	163	128	149	164	1165	716	400	536	656	650	680	633	692	559	PNKP
572	ENSG00000039987	5	10	5	7	29	14	25	17	32	52	2	7	4	18	8	5	15	10	11	16	9	11	10	11	15	6	21	15	14	BEST2
573	ENSG00000040199	205	306	529	289	367	173	139	230	248	355	295	143	154	191	376	346	308	380	495	212	232	90	166	337	281	261	381	323	370	PHLPP2
574	ENSG00000040275	377	554	497	246	844	394	248	563	492	564	359	276	318	566	470	266	75	251	215	560	150	145	418	272	420	469	405	408	246	SPDL1
575	ENSG00000040341	897	770	1516	793	1650	793	529	958	1202	1171	1458	585	892	870	1270	1301	572	1021	1250	858	1048	602	1038	679	1203	931	1253	1016	940	STAU2
576	ENSG00000040487	474	319	750	385	600	428	287	503	577	717	707	295	408	676	630	110	66	89	112	515	434	340	467	766	586	494	1253	535	448	PQLC2
577	ENSG00000040531	861	429	1244	563	718	727	544	845	1177	873	1288	457	603	691	981	356	229	236	260	1085	751	834	452	605	904	720	1091	786	448	CTNS
578	ENSG00000040608	133	196	81	53	603	93	108	162	194	361	245	139	126	226	204	20	19	16	16	231	120	110	127	164	136	258	256	181	170	RTN4R
579	ENSG00000040633	1027	696	1207	679	1045	619	452	997	916	950	935	412	724	534	805	257	222	219	251	1107	1003	910	745	921	683	717	1549	1007	906	PHF23
580	ENSG00000040731	0	1	0	0	0	1	0	0	0	3	3	3	1	4	0	24	6	26	29	0	1	0	0	0	0	0	1	0	1	CDH10
581	ENSG00000040933	613	885	1410	692	1376	784	666	885	840	1531	948	784	446	875	1719	744	376	591	784	867	509	261	816	1196	1045	675	792	1197	934	INPP4A
582	ENSG00000041353	2356	2222	2901	1545	3707	1964	1636	2471	3080	2134	4215	1331	1944	2624	4183	4482	1175	3046	3191	3031	4157	1286	3004	2383	4600	2228	5087	2817	2777	RAB27B
583	ENSG00000041357	3961	1997	4537	2134	3675	2396	1640	3492	3374	4766	3009	2547	2649	3179	4089	1519	620	906	1139	3397	3458	3959	5681	3734	3991	3055	5157	3524	2830	PSMA4
584	ENSG00000041515	93	9	14	11	8	11	21	18	29	13	16	54	24	14	21	21	20	39	55	13	11	5	20	23	14	5	3	13	9	MYO16
585	ENSG00000041802	2271	1571	2653	1281	2886	2309	1521	2577	3410	2775	2765	1021	2080	2370	2787	1475	927	1040	1266	2728	1545	862	1308	1562	2345	3294	2236	1956	1817	LSG1
586	ENSG00000041880	422	288	744	405	749	523	658	823	763	764	783	334	462	726	760	120	89	94	120	874	487	349	1195	656	840	327	605	533	463	PARP3
587	ENSG00000041982	19749	16112	36953	20251	6024	8571	2126	7198	18354	33999	14675	4115	9402	3483	35843	1293	1651	853	2348	12249	6989	7291	2574	2148	8963	9758	5640	23413	18012	TNC
588	ENSG00000041988	195	189	284	145	320	209	145	228	232	268	242	181	212	247	314	147	97	113	110	242	113	202	314	206	215	162	254	222	142	THAP3
589	ENSG00000042062	392	401	500	289	255	785	476	554	840	1298	3218	447	463	1085	1781	189	208	124	245	537	763	193	318	508	679	516	1166	462	580	FAM65C
590	ENSG00000042088	652	420	1110	597	1193	459	370	321	761	903	668	691	511	754	689	459	352	376	438	853	529	429	564	600	771	526	597	689	520	TDP1
591	ENSG00000042286	159	209	291	178	275	197	132	217	197	292	204	213	138	116	247	139	125	161	157	227	133	184	278	367	515	303	820	214	272	AIFM2
592	ENSG00000042304	0	0	1	0	0	0	0	0	0	1	0	0	0	0	0	2	0	1	0	0	0	0	0	0	0	0	0	0	0	C2orf83
593	ENSG00000042317	138	162	216	96	203	116	96	167	121	137	123	126	110	157	180	411	192	396	341	137	122	97	147	186	252	141	124	109	161	SPATA7
594	ENSG00000042429	509	917	1145	616	924	741	612	975	955	869	652	601	848	985	1014	879	478	760	865	972	820	500	668	664	750	731	950	864	683	MED17
595	ENSG00000042445	2052	1412	3997	2094	3053	2120	1814	3122	2873	2700	3187	790	1449	1762	3059	1955	1043	1548	1628	2941	1918	1145	2011	2208	4495	1705	7235	1766	2338	RETSAT
596	ENSG00000042493	7912	3429	8645	4483	6151	2258	1828	2864	4018	5417	4885	3465	4040	3351	4520	1531	1009	1144	1056	4613	4948	6453	5190	3883	4512	4662	2139	4913	3700	CAPG
597	ENSG00000042753	3146	1345	3839	1930	2467	1668	1083	2078	3114	3862	2786	1676	1934	2536	2383	585	386	407	376	2726	2389	5408	3161	2539	3016	2680	4226	2541	2408	AP2S1
598	ENSG00000042781	3	10	7	4	6	6	7	4	12	8	5	10	8	11	12	100	62	112	121	10	12	2	13	2	2	6	8	5	8	USH2A
599	ENSG00000042813	1	0	1	0	2	0	2	1	0	3	1	5	0	2	2	20	3	6	18	1	0	0	1	0	0	1	0	0	0	ZPBP
600	ENSG00000042832	16	81	38	11	318	48	62	76	26	131	20	82	16	71	155	181	349	375	533	29	51	11	23	82	127	23	278	70	97	TG
601	ENSG00000042980	67	218	399	258	191	312	215	240	283	445	323	408	156	266	898	271	250	226	351	160	77	102	587	600	328	537	183	297	227	ADAM28
602	ENSG00000043039	1282	3286	2507	866	1782	518	945	1276	965	1924	2624	2177	599	3004	1266	273	158	156	233	2043	1314	1318	1124	2323	3701	2241	1685	725	1175	BARX2
603	ENSG00000043093	1364	1380	2534	1279	2540	1319	1025	1664	1805	1929	2226	974	1721	1742	2209	2310	743	1839	1944	1732	1531	1156	1360	1487	2095	2128	2077	1752	1738	DCUN1D1
604	ENSG00000043143	578	1284	1836	863	5990	914	1078	1169	1049	1599	1506	770	614	617	1382	481	482	368	515	682	321	367	741	1458	1238	774	996	1407	887	PHF15
605	ENSG00000043355	5	22	12	11	7	55	19	52	166	28	251	3	41	16	61	2	0	1	1	56	22	7	18	11	15	28	21	11	15	ZIC2
606	ENSG00000043462	554	197	1627	815	337	548	396	273	412	2521	911	873	449	581	1484	223	208	179	344	249	104	610	1429	1835	343	183	361	842	786	LCP2
607	ENSG00000043514	893	759	871	513	1509	604	436	924	837	987	817	840	679	1561	1169	769	700	738	766	853	741	371	682	746	717	712	532	494	483	TRIT1
608	ENSG00000043591	0	11	80	21	64	32	13	41	10	83	58	16	15	21	23	20	9	16	9	10	12	4	4	19	48	18	133	6	11	ADRB1
609	ENSG00000044012	3	9	1	0	0	1	1	0	4	3	4	1	2	0	3	1	1	0	0	2	4	3	9	7	2	4	3	2	3	GUCA2B
610	ENSG00000044090	818	1515	1261	598	1172	1003	636	1186	1526	1411	1082	765	640	1348	1304	371	216	309	359	1095	558	304	520	730	1069	784	996	724	787	CUL7
611	ENSG00000044115	13828	12545	15980	8417	14089	7485	5965	10385	12407	13578	11961	6465	8824	10511	12815	7000	4889	5965	6185	11714	7325	7836	5345	5681	15816	11705	12516	11294	11839	CTNNA1
612	ENSG00000044446	552	976	892	492	1037	748	532	951	911	1057	1061	569	495	1307	1083	619	355	505	536	1112	700	177	488	784	1125	921	1463	793	648	PHKA2
613	ENSG00000044459	171	561	286	154	447	197	112	252	198	356	272	256	135	120	411	853	330	577	761	246	195	64	133	191	605	349	210	257	324	CNTLN
614	ENSG00000044524	43	52	151	98	134	78	357	49	60	85	97	85	25	37	82	200	90	195	202	57	25	46	33	72	73	45	103	71	135	EPHA3
615	ENSG00000044574	13060	7363	15023	8401	16733	10853	6451	11759	15598	18353	11708	4530	10837	8687	15238	2306	1495	1728	1859	12839	8952	10678	5248	8147	12814	8841	24683	12448	11720	HSPA5
616	ENSG00000046604	1936	6296	1230	614	2762	487	319	1076	838	1421	1569	678	935	888	1108	841	510	763	819	931	678	856	335	748	1088	2819	2608	771	787	DSG2
617	ENSG00000046647	370	346	470	257	551	290	179	303	336	462	335	213	212	226	332	311	256	265	250	608	358	273	358	342	383	303	359	417	303	GEMIN8
618	ENSG00000046651	948	782	1232	667	1537	751	659	967	948	1375	956	883	926	1377	1552	1530	1000	1381	1308	1475	808	316	1029	998	993	874	661	1149	686	OFD1
619	ENSG00000046653	725	1181	1352	867	959	554	431	512	516	620	727	497	514	862	770	1254	393	1350	833	649	361	568	384	437	830	471	641	730	1226	GPM6B
620	ENSG00000046774	0	0	1	0	0	0	0	0	0	0	0	0	0	0	1	0	0	1	0	0	0	0	0	0	0	0	0	10	0	MAGEC2
621	ENSG00000046889	286	326	654	412	325	350	252	283	260	253	555	262	226	191	368	1420	721	1386	1324	320	282	50	184	243	408	235	289	550	892	PREX2
622	ENSG00000047056	1110	1109	2341	1169	1617	913	761	1223	1397	1611	1883	1313	1018	1240	1628	665	457	571	656	1565	1628	543	965	1338	1753	1070	1516	1330	1329	WDR37
623	ENSG00000047188	2242	2030	3055	1695	2351	1890	1509	2345	2584	2551	2371	1374	1370	3069	2758	2371	1188	2072	2432	3104	1894	580	1492	1675	2487	1677	2129	2284	2200	YTHDC2
624	ENSG00000047230	301	606	371	245	690	271	286	410	386	527	365	274	187	528	430	659	388	499	683	483	218	143	293	364	498	296	400	369	377	CTPS2
625	ENSG00000047249	1844	982	2311	1056	2119	1162	831	1437	1551	2107	1260	863	1323	1438	1544	1055	683	748	866	1541	1370	1244	1492	1095	1803	1578	2728	1604	1437	ATP6V1H
626	ENSG00000047315	3037	3464	4461	2432	6188	2782	1997	3826	3703	4460	4186	2320	2586	4666	3899	3325	2142	2634	2805	4369	3196	1422	2534	3530	4975	3518	4970	3306	3198	POLR2B
627	ENSG00000047346	1641	1333	2191	1065	1791	1771	1051	1735	2021	1769	2658	990	1293	2169	2689	2024	961	1917	2269	2278	2300	823	1730	1864	2332	1755	2524	1766	1608	FAM214A
628	ENSG00000047365	4759	1791	5411	2781	3179	2507	2111	3022	3799	3001	4907	2400	2737	3905	5477	8492	3777	5267	5961	6393	5422	1150	2006	2777	4767	3025	2965	5000	4042	ARAP2
629	ENSG00000047410	4611	7478	7768	4169	8253	4060	2857	5135	5967	5663	6522	3730	2857	6146	8422	8646	5217	7092	7715	8571	4963	868	2521	3816	7410	6552	5464	6009	4989	TPR
630	ENSG00000047457	4	199	251	226	237	285	250	305	336	513	572	171	130	96	461	1349	1711	967	1216	144	5	37	194	454	373	118	512	135	468	CP
631	ENSG00000047578	929	978	1564	662	982	778	632	926	1096	1136	1791	695	688	1302	1554	529	475	454	594	1339	1275	299	674	879	1322	918	1110	894	910	KIAA0556
632	ENSG00000047579	326	319	578	296	876	243	166	327	315	630	292	302	233	557	454	158	105	120	175	265	238	263	484	483	456	336	412	298	317	DTNBP1
633	ENSG00000047597	113	15	146	54	386	79	75	96	94	256	65	307	45	145	301	122	34	68	74	135	30	28	88	229	55	5	33	75	63	XK
634	ENSG00000047617	19	19	45	14	21	19	7	21	21	19	27	21	45	22	32	103	145	99	120	33	45	4	11	27	45	23	30	51	48	ANO2
635	ENSG00000047621	887	607	1221	594	715	608	392	755	840	1208	600	619	778	1028	974	583	252	475	563	978	567	540	666	580	868	683	627	762	656	C12orf4
636	ENSG00000047634	380	251	610	307	456	547	423	586	492	810	543	895	377	807	640	535	183	515	561	614	469	91	695	587	423	276	259	442	326	SCML1
637	ENSG00000047644	1178	1947	2539	1209	3015	1172	1354	1569	1765	2659	1926	1292	957	3036	2563	888	616	638	836	1248	1018	370	813	1420	1700	1073	2060	1398	1813	WWC3
638	ENSG00000047648	54	53	169	105	270	103	85	77	49	165	163	147	49	46	115	174	138	177	209	79	33	32	45	92	87	23	85	69	218	ARHGAP6
639	ENSG00000047662	135	457	287	141	460	338	238	462	300	415	315	243	198	504	520	454	246	419	478	411	229	43	202	290	312	168	470	293	261	FAM184B
640	ENSG00000047849	16840	8845	23712	10827	13714	9305	7131	13110	17958	16125	19218	4433	12915	8185	18294	3797	2747	2873	3960	15927	9458	6986	4057	4561	14253	9772	10990	12624	12725	MAP4
641	ENSG00000047932	1013	2061	2221	1200	1563	1448	1207	1731	1526	1658	1461	1054	1125	1815	1825	1966	892	1578	1721	1567	1125	512	1038	1421	1949	1394	2283	1546	1622	GOPC
642	ENSG00000047936	11	13	14	4	5	78	72	461	0	9	2	0	5	1	15	494	6	62	45	0	3	18	92	371	360	34	2329	11	70	ROS1
643	ENSG00000048028	464	714	1236	565	1140	687	442	966	758	699	656	950	768	715	1078	560	343	398	576	742	446	329	714	652	712	713	937	664	560	USP28
644	ENSG00000048052	82	114	345	173	156	132	156	107	88	246	177	141	114	140	286	715	303	453	681	105	57	133	191	216	239	109	104	230	337	HDAC9
645	ENSG00000048140	2769	1044	1808	967	1468	1266	874	1482	1472	2612	1484	775	1106	2179	1504	395	260	220	353	1416	1136	1967	2414	1778	1744	1673	2831	1576	1589	TSPAN17
646	ENSG00000048162	788	403	689	380	762	516	432	736	856	912	495	561	528	881	722	224	116	194	201	838	889	642	648	436	781	672	1240	596	652	NOP16
647	ENSG00000048342	389	307	300	174	383	242	147	411	368	240	374	114	220	136	255	923	587	780	920	625	243	100	150	211	466	383	209	267	369	CC2D2A
648	ENSG00000048392	1653	862	2371	1423	1860	818	676	734	980	2285	1288	521	671	1552	1379	1159	457	951	958	1253	1211	844	1305	999	1225	872	1495	1862	1561	RRM2B
649	ENSG00000048405	1623	876	2189	1117	1434	1552	922	1566	2676	1840	1841	1049	1089	1810	2129	2544	954	2015	2105	2125	2254	856	1171	1333	1796	1476	1679	1634	1449	ZNF800
650	ENSG00000048462	1	2	16	9	1	53	30	14	13	7	25	40	20	31	142	22	6	8	10	1	0	132	99	50	4	1	2	30	2	TNFRSF17
651	ENSG00000048471	2167	1321	2674	1346	1739	986	845	1450	1747	2239	2977	1050	985	1012	2113	1190	991	851	1316	2059	1626	1099	868	1426	2341	1629	1886	1901	2216	SNX29
652	ENSG00000048540	0	3899	15	11	18	32	30	111	14	20	30	33	7	13	18	105	37	63	141	9	17	5	19	35	46	9	63	7	15	LMO3
653	ENSG00000048544	1922	937	1918	944	1946	918	626	1263	1160	1939	1403	644	1476	1660	1604	741	374	551	676	1736	1370	1592	1821	1145	1642	1567	1816	1466	1241	MRPS10
654	ENSG00000048545	2	57	2	5	7	1	2	2	0	2	2	4	0	0	2	3	0	2	2	0	1	1	1	3	3	1	0	1	0	GUCA1A
655	ENSG00000048649	1014	1970	2262	1240	1962	1014	820	1433	1184	1461	1404	1366	1203	1460	1809	2614	1582	2065	2607	1662	1109	388	853	1463	1892	1710	2126	1697	1729	RSF1
656	ENSG00000048707	5311	4699	8862	4922	8950	2470	2203	3568	4016	3684	4510	2318	2600	4315	6297	11893	9437	11067	14431	6964	5421	1429	2992	3832	10667	6047	6722	7367	7833	VPS13D
657	ENSG00000048740	378	2521	2743	1476	1223	981	774	586	855	2845	1631	1346	454	756	2185	1165	1218	1233	1315	527	432	567	1365	2175	1087	481	837	1417	1605	CELF2
658	ENSG00000048828	4904	2855	5824	3021	7451	4455	3339	6630	7754	8544	5489	3259	4933	5171	6823	1822	1102	1556	2220	4799	3123	2619	3376	3826	5982	4576	6714	5076	4752	FAM120A
659	ENSG00000048991	1039	850	1676	832	1462	969	623	1531	1347	1640	1400	798	948	1253	1758	550	275	439	514	1463	559	566	984	984	1592	1361	1368	1118	932	R3HDM1
660	ENSG00000049089	37	969	154	65	381	100	88	249	100	168	127	156	157	313	240	71	57	63	50	69	48	52	482	205	247	62	85	156	143	COL9A2
661	ENSG00000049130	1488	2095	2869	1454	2017	1473	1296	1499	1726	1185	1654	698	1082	2065	1940	3178	682	3269	2043	1446	1145	552	1463	1470	2590	1463	1309	1782	2623	KITLG
662	ENSG00000049167	258	241	326	170	334	213	124	255	271	259	184	203	169	375	276	380	145	313	274	278	187	253	462	282	394	245	410	265	281	ERCC8
663	ENSG00000049192	197	451	164	82	67	58	27	37	48	54	44	78	37	69	113	147	70	87	102	79	36	11	65	76	54	29	14	52	65	ADAMTS6
664	ENSG00000049239	2273	4038	4871	3167	8848	3611	2856	4154	4942	5640	5567	2420	1476	3659	5876	2008	1891	1868	2137	4137	2142	1039	1900	3743	5436	2579	5983	3662	4182	H6PD
665	ENSG00000049245	5354	3084	5837	3119	4411	3175	2492	4381	4853	5107	4176	2647	3212	4074	4325	2236	1246	1851	1893	4583	4697	5401	5433	4074	5321	4246	4700	4816	4584	VAMP3
666	ENSG00000049246	1866	1669	2376	1143	3362	1639	1319	2951	1557	2602	3096	1449	1212	3629	1657	930	483	2118	2051	2001	2169	378	1209	2098	2700	1822	4049	2501	2901	PER3
667	ENSG00000049247	2	3	21	15	11	7	10	2	4	15	4	5	8	5	10	3	4	13	15	4	0	27	14	15	3	3	8	15	8	UTS2
668	ENSG00000049249	5	8	175	72	31	24	50	22	16	196	54	38	20	28	80	11	2	2	5	17	4	37	85	105	11	11	26	95	39	TNFRSF9
669	ENSG00000049283	3957	1063	2913	1297	1951	2180	1542	2877	5656	2598	7992	947	2989	2719	3153	331	163	142	132	4627	2841	2789	1469	1389	3101	4221	4255	2089	1809	EPN3
670	ENSG00000049319	0	24	6	3	3	10	10	9	4	5	2	8	6	0	5	6	0	3	2	3	6	2	4	9	23	4	1	5	8	SRD5A2
671	ENSG00000049323	2862	3064	4731	2943	3245	1789	1794	2334	3601	3788	6849	769	4020	913	3291	2611	2555	3065	1751	3180	2462	2878	975	1512	2579	4338	1459	4891	5187	LTBP1
672	ENSG00000049449	996	1034	1906	1233	1554	1090	807	1021	1304	2274	1514	881	1057	733	1340	797	575	599	924	820	684	1481	1122	1268	1393	1001	1312	1712	1642	RCN1
673	ENSG00000049540	242	1520	1415	786	603	1916	2966	1451	1058	668	3948	615	288	589	1107	646	4506	603	1083	469	77	362	225	376	1482	968	1840	656	2658	ELN
674	ENSG00000049541	1036	674	1228	618	2191	524	416	698	1008	1680	769	1109	577	1077	963	402	246	275	313	1420	948	742	1093	811	1113	991	1124	803	642	RFC2
675	ENSG00000049618	3011	3868	5730	2743	4816	2429	2044	3691	4132	3758	4784	3561	2905	3761	4846	2239	1237	1799	2803	3867	2515	1025	1847	2936	5301	3603	4578	3502	3879	ARID1B
676	ENSG00000049656	2496	1701	3505	1868	3008	2018	1448	2288	3065	3152	3023	2261	2077	3464	3519	802	553	477	611	2598	2412	2723	2267	2754	2755	2422	3411	2600	2264	CLPTM1L
677	ENSG00000049759	581	1608	544	331	1370	297	471	321	371	441	459	524	583	464	806	580	434	565	659	511	566	482	452	320	848	679	461	360	525	NEDD4L
678	ENSG00000049768	76	55	886	457	172	256	161	210	293	1366	351	196	210	217	590	19	11	7	16	159	90	145	538	671	126	71	238	621	195	FOXP3
679	ENSG00000049769	96	70	148	79	208	134	81	220	242	245	115	77	67	151	188	54	33	29	52	126	103	72	118	178	185	142	360	130	107	PPP1R3F
680	ENSG00000049860	2474	1874	2991	1828	2444	1964	1513	2094	2441	3061	2231	1307	2230	1680	2628	2254	1221	1408	1681	2538	1983	3123	2670	1893	2819	1848	2646	2737	2841	HEXB
681	ENSG00000049883	243	190	306	145	310	186	133	245	268	259	153	125	164	222	220	207	117	139	183	414	126	119	284	159	316	230	373	244	192	PTCD2
682	ENSG00000050030	26	236	54	57	188	14	34	33	15	44	37	232	9	50	242	199	72	129	209	268	34	14	26	15	78	15	112	96	50	KIAA2022
683	ENSG00000050130	999	856	1500	777	1101	761	565	1054	890	1172	1055	745	792	959	1192	912	489	607	757	1084	1030	1005	1006	1046	1345	750	1391	1200	1030	JKAMP
684	ENSG00000050165	1890	2864	2192	1194	2817	1284	1098	2347	1813	1634	2852	778	1116	1044	2140	823	503	714	722	1035	1138	1081	895	2078	2321	2094	3103	3871	3132	DKK3
685	ENSG00000050327	669	506	1064	541	856	480	535	626	708	796	1032	558	538	711	998	392	304	541	498	676	1004	379	371	500	849	641	807	686	568	ARHGEF5
686	ENSG00000050344	709	1185	1418	741	1378	1568	1031	1362	1904	2427	1274	818	488	1504	2344	1944	968	1359	1965	758	988	1098	1061	2025	1932	1896	2474	1307	1171	NFE2L3
687	ENSG00000050393	1138	599	1172	605	1146	744	535	989	1406	979	1162	573	934	1420	1127	678	329	411	544	1039	1229	1404	1148	1126	1126	1084	1519	893	898	MCUR1
688	ENSG00000050405	10396	2752	13593	7166	6820	5084	3307	6462	7348	9019	9266	3863	6821	3452	10833	3285	1703	2636	4008	9948	9368	7043	4191	4492	12708	8415	4612	8459	7231	LIMA1
689	ENSG00000050426	859	996	1305	640	1469	1428	1084	1728	1883	2073	1200	1038	926	2887	2224	1024	759	953	1024	1911	909	609	1608	1720	1483	1008	2590	960	816	LETMD1
690	ENSG00000050438	153	55	162	82	67	36	35	36	58	110	84	56	78	55	86	43	29	33	48	98	82	30	50	56	157	89	59	90	116	SLC4A8
691	ENSG00000050555	503	701	965	596	407	447	237	448	539	1264	977	228	292	140	314	124	279	114	145	338	73	66	40	97	233	164	190	447	781	LAMC3
692	ENSG00000050628	1924	886	1662	1211	1802	2902	1686	2066	4182	1255	2324	336	1000	2574	3629	2896	807	2687	2985	2394	4878	1982	1005	1663	2553	1640	2511	2581	2043	PTGER3
693	ENSG00000050730	55	17	32	16	23	127	13	49	188	99	22	15	46	93	229	7	0	2	8	10	27	177	65	50	51	39	231	91	17	TNIP3
694	ENSG00000050748	985	947	1525	845	1412	728	623	1092	964	1447	1208	898	799	1759	1730	802	447	604	769	993	763	775	1174	930	1262	1010	1418	1014	1177	MAPK9
695	ENSG00000050767	173	195	438	360	383	191	107	259	209	702	381	208	118	141	351	53	48	34	51	306	87	82	106	178	198	65	488	204	295	COL23A1
696	ENSG00000050820	1769	678	1783	993	1207	850	454	1104	1404	2182	1277	460	1435	681	1292	165	149	113	126	1018	2310	1256	775	732	1647	936	1848	1399	1524	BCAR1
697	ENSG00000051009	961	1216	1266	677	1483	1351	1056	1651	1644	1769	1480	837	1196	1936	1939	487	328	404	468	1870	1148	333	616	1126	1370	1010	1065	997	1144	FAM160A2
698	ENSG00000051108	1458	1339	3471	1765	1934	2090	1605	1938	2304	2668	1766	1323	1471	1745	3583	1472	861	1177	1276	1712	1630	3015	3544	3545	2774	1357	4317	2197	2241	HERPUD1
699	ENSG00000051128	1133	391	641	326	389	399	311	672	871	868	960	239	779	383	697	77	54	50	79	794	874	759	544	453	1070	1114	496	824	683	HOMER3
700	ENSG00000051180	291	181	274	107	604	149	110	219	300	368	198	124	157	420	245	134	42	53	60	402	130	131	230	161	193	223	171	267	161	RAD51
701	ENSG00000051341	400	294	497	210	1065	243	201	302	492	413	360	303	272	521	438	581	116	222	307	582	244	35	245	200	296	562	285	425	191	POLQ
702	ENSG00000051382	1260	2020	2888	1487	4129	1583	1204	1791	2239	1891	3347	896	1404	1721	3414	1371	631	1006	1300	2527	1314	802	1326	1760	2283	2404	2034	1935	1851	PIK3CB
703	ENSG00000051523	591	548	1660	766	1145	990	886	867	1111	3449	1187	1265	900	1235	2574	160	159	96	133	435	249	2320	2159	2323	871	819	1042	998	895	CYBA
704	ENSG00000051596	363	272	259	165	663	157	125	228	237	560	472	239	307	499	515	166	65	118	87	406	264	573	361	231	516	476	695	555	468	THOC3
705	ENSG00000051620	3652	1697	3720	1775	2200	1480	1126	2119	2212	2988	3426	3330	3371	5262	2885	1585	917	1168	1149	2561	3746	3938	3626	3312	3537	3488	4388	2117	2505	HEBP2
706	ENSG00000051825	359	441	687	345	804	452	295	479	566	608	416	585	243	785	780	793	363	574	720	624	247	112	536	575	476	398	533	484	353	MPHOSPH9
707	ENSG00000052126	1336	1078	1782	907	963	671	662	887	1050	1395	1875	764	1268	1133	1287	2510	1421	2326	2271	1212	1185	563	675	1149	1517	1495	934	1037	1294	PLEKHA5
708	ENSG00000052344	3773	1457	4405	1813	1860	1978	1402	2247	3749	2947	7207	825	3676	2980	3260	461	221	252	310	3184	2969	3940	2295	2228	4198	2919	7374	1836	2161	PRSS8
709	ENSG00000052723	1189	1739	2544	1395	2702	1566	1318	1961	2197	2050	1695	1107	1277	2271	2444	2101	739	1656	1628	2003	1615	940	1720	1581	2113	2010	2267	1662	1604	SIKE1
710	ENSG00000052749	2034	1188	2379	1176	1871	1766	1273	2089	3141	3162	2189	1580	1500	2266	2078	286	242	295	238	2368	1610	672	341	784	1792	1753	2009	1464	1586	RRP12
711	ENSG00000052795	2081	1019	3080	1813	2514	973	677	1180	1495	1363	1243	1033	1060	1294	1857	1974	1308	2083	2177	2255	1611	658	747	1394	1452	861	858	2494	2184	FNIP2
712	ENSG00000052802	2921	2601	2952	1365	5754	4904	2649	10628	3712	2900	4007	951	3098	3235	3866	3916	568	1768	1269	4616	6241	5692	4365	9238	10741	4507	37309	4547	3839	MSMO1
713	ENSG00000052841	1605	2630	2773	1661	2650	1520	1218	2041	1800	2362	2097	1418	1470	2704	2665	3377	2056	2828	3388	2475	1834	688	1247	2048	2425	1432	1988	1720	1974	TTC17
714	ENSG00000052850	7	74	42	24	31	22	15	18	10	27	9	4	15	0	14	94	28	50	57	32	2	6	22	38	78	23	95	17	49	ALX4
715	ENSG00000053108	190	141	549	306	535	90	65	435	220	188	942	223	216	120	409	122	64	74	104	1013	458	154	162	233	653	451	161	1166	578	FSTL4
716	ENSG00000053254	2755	3683	7732	4394	8966	2475	3188	3733	4136	3383	5543	2842	2375	5241	5795	5074	3943	4989	5491	4187	4325	1519	2263	5659	6376	2931	4266	5287	6000	FOXN3
717	ENSG00000053328	7	18	36	14	13	17	12	9	16	28	33	17	7	12	19	77	49	69	74	3	2	24	25	11	6	5	5	17	22	METTL24
718	ENSG00000053371	932	548	1098	597	1280	616	481	838	1082	1017	718	717	621	861	918	419	260	262	337	675	562	1133	968	929	877	581	1734	796	785	AKR7A2
719	ENSG00000053372	2089	1038	1863	939	1864	981	609	1511	1783	2176	1292	1186	1084	1353	1339	443	313	377	389	1899	1445	1191	1125	1100	1622	1840	1903	1523	1197	MRTO4
720	ENSG00000053438	40	49	69	37	103	69	47	127	76	92	75	49	39	93	132	104	82	131	130	108	52	18	37	91	177	66	1728	102	53	NNAT
721	ENSG00000053501	490	312	573	227	566	273	218	425	404	703	417	376	371	370	402	96	68	61	72	519	332	493	607	472	441	381	528	348	331	USE1
722	ENSG00000053524	60	103	102	32	47	44	28	30	51	118	119	82	83	40	76	127	73	79	106	48	57	13	37	100	72	111	66	50	45	MCF2L2
723	ENSG00000053702	71	101	116	62	118	60	44	59	74	112	65	89	28	96	142	105	94	107	123	121	49	17	75	101	111	68	91	71	71	NRIP2
724	ENSG00000053747	10448	2569	8053	4799	6803	2568	1389	5250	4220	4659	6640	1652	3342	1870	10417	3809	3468	3009	4207	5400	5508	7425	1764	1119	6337	6957	1968	7206	4698	LAMA3
725	ENSG00000053770	850	781	1468	789	1430	973	704	1307	1109	1296	947	751	851	1315	1359	1430	565	977	1195	1228	1009	743	1070	1311	1509	935	2414	1262	1116	AP5M1
726	ENSG00000053900	1199	1188	1587	870	1522	1081	834	1495	1368	1736	1066	1084	798	1740	1805	1641	688	1376	1506	1404	1030	404	1206	1222	1333	941	1026	1263	1022	ANAPC4
727	ENSG00000053918	66	58	181	111	297	59	55	78	77	283	123	117	76	171	231	38	41	20	36	59	21	116	98	516	85	68	61	83	102	KCNQ1
728	ENSG00000054116	2340	1237	2290	1206	2357	1330	789	1509	2034	2135	2074	1123	1843	1848	1948	843	617	664	707	2026	2002	2707	1840	1645	2068	1806	2004	1920	1596	TRAPPC3
729	ENSG00000054118	4658	4612	5639	3342	9653	3754	2580	5186	5609	7212	5807	3591	3455	5027	6703	2973	2478	2651	3250	5248	3391	1597	2451	4185	4981	4042	4959	4613	4345	THRAP3
730	ENSG00000054148	915	465	603	324	1099	758	708	799	953	1406	631	910	775	1079	1210	250	158	176	219	741	466	1010	1506	966	803	504	1492	876	860	PHPT1
731	ENSG00000054179	142	135	57	37	430	210	137	300	203	651	364	249	176	376	305	11	12	10	8	301	64	124	181	258	494	137	2535	156	181	ENTPD2
732	ENSG00000054219	98	228	715	372	442	297	247	380	271	903	310	366	149	317	587	290	158	395	275	153	200	82	540	698	317	479	252	435	233	LY75
733	ENSG00000054267	1129	2106	2209	1145	2313	1208	937	1500	1533	1689	1738	1082	984	1725	1972	2504	1250	1980	2202	1897	1255	407	1033	1463	1852	1239	1868	1733	1628	ARID4B
734	ENSG00000054277	123	71	210	99	229	104	65	156	179	198	169	232	124	204	145	81	51	49	48	101	146	236	155	151	141	174	197	124	125	OPN3
735	ENSG00000054282	384	508	797	448	852	466	394	571	475	632	509	668	378	606	597	787	545	724	912	622	561	379	617	580	612	311	481	527	486	SDCCAG8
736	ENSG00000054356	2	1	1	1	0	0	1	1	4	3	0	2	1	1	0	1	0	0	0	0	0	2	3	3	1	1	0	0	1	PTPRN
737	ENSG00000054392	74	307	166	125	339	186	135	302	201	301	217	114	112	182	263	177	106	142	271	110	222	83	171	214	416	195	424	257	307	HHAT
738	ENSG00000054523	4783	4161	7101	3371	4238	2380	1691	2885	5068	3035	4253	1443	2425	2802	4527	4699	2967	3618	4946	6551	4732	1675	1458	2636	5444	6086	6292	5104	4915	KIF1B
739	ENSG00000054598	346	965	365	197	252	651	609	1155	406	476	438	102	393	341	428	280	101	178	215	184	496	428	542	1249	2285	1000	5894	472	879	FOXC1
740	ENSG00000054611	1183	798	1419	745	1635	786	571	1084	1057	1529	1197	598	857	1039	1390	486	380	313	485	1175	857	903	969	1138	1381	1019	1607	1055	988	TBC1D22A
741	ENSG00000054654	3825	6465	6184	3896	13403	3081	2784	4149	3798	5336	5938	5989	3254	5503	9884	31588	18719	22902	28434	7681	6440	849	3029	5732	11456	5670	5458	10767	6873	SYNE2
742	ENSG00000054690	465	472	447	230	554	983	765	1254	913	1100	410	402	229	515	813	750	585	721	841	565	450	113	429	1103	1968	321	5220	379	614	PLEKHH1
743	ENSG00000054793	1776	2199	2155	1305	2468	1133	1144	1466	2024	1671	1790	675	1234	1485	1835	965	665	798	1471	1389	1535	810	554	1377	5336	3118	4135	2748	1966	ATP9A
744	ENSG00000054796	0	0	0	0	0	1	0	0	0	0	0	0	0	0	0	1	0	1	3	0	0	0	0	0	0	0	0	0	0	SPO11
745	ENSG00000054803	0	0	0	0	0	0	1	1	0	2	0	2	2	0	1	1	0	0	0	0	0	0	0	0	0	0	0	1	1	CBLN4
746	ENSG00000054938	0	143	22	20	6	28	8	11	5	17	19	34	6	2	49	4	3	2	2	0	2	71	35	8	16	5	29	17	39	CHRDL2
747	ENSG00000054965	1029	1873	2313	1107	2112	1144	865	1681	1338	1620	1549	1272	998	1058	2200	790	563	630	867	1432	642	379	617	1188	1812	1136	2122	1315	1623	FAM168A
748	ENSG00000054967	277	105	359	215	245	195	126	176	245	584	410	315	221	336	444	66	58	56	76	380	287	117	229	235	313	237	320	296	224	RELT
749	ENSG00000054983	610	523	1265	733	1336	622	441	594	615	1230	770	656	560	842	1028	990	416	752	968	539	624	431	519	976	1334	447	824	812	1233	GALC
750	ENSG00000055044	2409	1604	2380	1197	3096	1833	1253	2587	2945	3771	2184	2801	2025	2649	3441	1448	775	1239	1222	3003	2270	1390	2015	1912	2932	2149	2616	2347	1692	NOP58
751	ENSG00000055070	2983	2137	3911	1918	4038	1548	1109	2202	2498	3721	3181	1762	2269	2530	3207	701	464	506	511	2729	2149	2187	2339	2709	3318	2874	3199	2865	2669	SZRD1
752	ENSG00000055118	2	11	45	20	120	42	16	22	40	43	25	35	30	46	29	7	4	6	2	12	3	21	125	24	54	29	162	26	23	KCNH2
753	ENSG00000055130	3392	2013	4132	1971	3476	2102	1482	2590	3253	4085	3230	2614	2380	3095	3399	1928	1280	1421	1758	3026	2702	1784	2377	2602	3434	3044	4263	2709	2536	CUL1
754	ENSG00000055147	786	657	972	541	815	595	366	761	758	841	504	456	576	792	711	654	352	558	570	809	439	551	652	573	816	603	792	714	712	FAM114A2
755	ENSG00000055163	129	1814	1250	540	711	604	331	526	317	1233	642	950	292	869	1352	190	134	128	223	271	89	584	803	1527	977	717	2123	607	760	CYFIP2
756	ENSG00000055208	3194	2985	4415	2521	3661	2167	1789	2900	3732	4202	5345	2441	2941	2729	3862	1490	838	1341	1705	3600	2595	1813	2439	3143	4364	3165	2914	3041	3164	TAB2
757	ENSG00000055211	1345	1219	1754	1114	1727	963	872	1301	1308	1626	1453	1221	1373	1224	1571	1085	598	1096	1159	1274	1286	1492	1577	1659	1745	1323	1566	1471	1667	GINM1
758	ENSG00000055332	2254	2161	2842	1376	7524	1136	775	1827	1445	3340	1778	2214	1641	1515	5977	1901	997	1748	2226	2808	1422	821	1383	3147	2109	1761	1643	2595	2902	EIF2AK2
759	ENSG00000055483	1698	2121	2817	1445	2275	1800	1477	2409	2657	2988	2339	1898	2057	1591	2637	655	580	603	717	3097	2256	581	961	1774	2142	2048	2716	2367	2036	USP36
760	ENSG00000055609	3121	4501	5824	2882	4439	1982	1748	2462	2649	2819	3484	3311	1915	3347	3994	8039	5079	6835	10458	5406	3891	693	2127	3041	4532	4008	5807	4404	4469	MLL3
761	ENSG00000055732	235	505	431	306	450	298	281	455	308	299	543	265	334	390	377	676	280	539	502	685	855	31	274	361	457	325	161	274	239	MCOLN3
762	ENSG00000055813	18	228	86	61	182	74	66	135	77	106	145	64	23	56	72	126	49	99	148	71	29	14	54	63	121	23	149	66	90	CCDC85A
763	ENSG00000055917	3800	6107	8051	4272	9797	3866	3496	5078	5211	5820	5762	5018	4280	6150	6501	4835	2403	4198	5195	6250	4342	1875	3633	5031	6919	4496	7002	4700	5559	PUM2
764	ENSG00000055950	1177	539	1249	642	1011	561	544	791	842	877	892	845	657	978	725	453	253	304	255	990	1074	1263	955	1133	1047	846	1497	811	801	MRPL43
765	ENSG00000055955	7	10	8	3	8	7	7	9	13	16	6	17	4	9	16	15	6	9	16	15	8	0	7	7	8	4	7	7	7	ITIH4
766	ENSG00000055957	2	2	7	1	2	3	3	8	2	35	4	7	1	6	14	0	2	1	4	1	3	5	8	24	5	3	5	5	2	ITIH1
767	ENSG00000056050	481	381	691	443	944	355	254	441	346	582	401	559	320	669	528	414	172	335	312	712	468	466	839	500	596	271	387	497	464	C4orf27
768	ENSG00000056097	3046	2724	4543	2272	3881	2473	1492	3348	3408	3576	3859	1886	2505	3730	4016	2837	1452	2360	2751	3986	2527	1524	2003	2698	4168	3219	4166	3398	3275	ZFR
769	ENSG00000056277	148	221	308	123	317	210	147	216	203	272	265	161	150	267	270	253	123	261	242	263	163	62	141	196	213	243	221	214	170	ZNF280C
770	ENSG00000056291	1	1	0	0	0	2	3	2	5	3	2	0	0	2	1	1	1	0	5	0	1	1	3	10	0	0	0	27	0	NPFFR2
771	ENSG00000056487	0	21	3	1	14	0	3	3	4	2	3	7	3	5	21	4	4	2	3	3	0	1	2	6	7	2	3	5	0	PHF21B
772	ENSG00000056558	374	188	1576	741	480	774	691	589	713	2640	1080	940	474	666	2001	337	238	294	462	719	297	397	1334	1832	464	200	411	1039	450	TRAF1
773	ENSG00000056586	1981	1651	3412	1824	3848	1632	1423	1824	2097	2307	2678	1425	2324	2433	3165	2508	1462	2441	2673	2460	2439	1108	1907	2456	2740	2311	3380	3199	3068	RC3H2
774	ENSG00000056661	397	683	500	297	635	428	286	631	658	544	747	384	379	373	513	40	41	37	41	941	374	280	312	455	515	619	421	416	508	PCGF2
775	ENSG00000056736	56	123	161	67	222	137	90	228	137	80	79	495	76	129	132	149	80	117	147	145	57	33	136	111	103	324	205	103	87	IL17RB
776	ENSG00000056972	2519	1575	2186	1254	1450	1386	930	1819	2551	2441	1908	1238	2169	1541	2233	917	629	692	858	1920	1449	2204	1845	1565	2083	1835	1664	1787	1514	TRAF3IP2
777	ENSG00000056998	89	110	57	58	152	52	64	55	90	119	30	42	28	57	71	96	115	267	147	123	96	26	82	97	164	92	62	60	88	GYG2
778	ENSG00000057019	839	767	1672	880	1928	620	601	865	895	872	847	621	585	887	776	1328	605	1233	1580	867	655	464	520	604	968	844	1208	942	937	DCBLD2
779	ENSG00000057149	27410	5714	6549	3135	4291	15378	2485	8266	29718	10248	26134	1568	18535	14905	13104	665	98	112	921	6729	14176	31389	8528	5619	12009	20399	14372	12044	3730	SERPINB3
780	ENSG00000057252	679	438	1855	858	1011	3753	1657	7402	664	1464	768	441	727	444	1170	3973	509	988	1073	671	399	1455	1483	7569	11838	1252	35730	1057	2501	SOAT1
781	ENSG00000057294	461	546	216	146	132	233	114	216	233	858	99	99	114	75	162	135	189	193	233	188	176	447	198	249	292	487	1755	176	237	PKP2
782	ENSG00000057468	2	3	3	2	3	4	4	5	7	9	4	63	0	14	3	27	9	20	17	6	3	0	7	9	2	2	4	5	4	MSH4
783	ENSG00000057593	6	21	18	13	55	10	2	13	11	23	12	15	1	7	14	10	4	3	10	2	4	3	8	23	18	8	16	17	36	F7
784	ENSG00000057608	7956	4913	11125	5776	7849	5681	3892	6771	8244	10769	6392	5136	5255	5010	7804	5707	3099	4349	4732	7150	5318	7561	7386	6670	7658	6322	8430	7560	7003	GDI2
785	ENSG00000057657	3136	2579	5345	1989	1619	2655	1809	2453	5105	4478	4940	1503	4204	3058	5345	1476	694	948	948	4135	3263	2713	2241	2655	4225	4970	3073	2488	2366	PRDM1
786	ENSG00000057663	820	847	1390	694	1046	614	437	820	765	1151	873	702	1064	1097	1290	869	380	665	776	691	831	854	1354	1051	1221	976	908	935	822	ATG5
787	ENSG00000057704	1170	542	1541	800	1432	761	598	909	994	1617	1884	803	1008	1178	2285	803	485	458	728	1818	1015	914	678	1250	1929	1523	2461	882	1198	TMCC3
788	ENSG00000057757	2842	1419	5088	2316	2511	1794	1035	2451	3355	2796	2011	1203	1912	3598	2930	1126	667	894	890	2969	2597	2272	1793	1775	2261	2026	2329	2721	2096	PITHD1
789	ENSG00000057935	1671	1113	1847	954	1913	1087	792	1578	1681	1737	1968	1217	1136	1591	1625	1267	663	974	1164	1384	1350	800	1141	1281	2164	1405	2228	1078	1267	MTA3
790	ENSG00000058056	203	347	469	289	1102	232	192	273	310	405	410	232	201	284	433	494	284	429	499	365	207	97	163	363	335	225	504	340	411	USP13
791	ENSG00000058063	6621	3305	7096	3672	5379	3860	2894	4544	6697	4947	6367	2323	5009	4864	6566	6124	2790	4919	5674	6160	5166	3108	3102	4057	5671	7685	5366	6279	5381	ATP11B
792	ENSG00000058085	18030	12773	12539	6803	4128	1548	2198	3059	3390	7158	4044	856	5204	2155	17866	1279	1300	918	1089	5272	6210	9220	1238	1115	8132	12670	1501	7133	5717	LAMC2
793	ENSG00000058091	177	362	500	277	413	221	278	135	175	291	312	293	127	156	410	457	313	531	567	144	184	213	185	187	181	122	135	376	389	CDK14
794	ENSG00000058262	7729	7223	11110	5948	12076	6918	4637	8199	11174	13386	10067	4528	7179	7828	11226	2282	1561	1710	2164	8531	5066	7124	4900	6023	7871	8008	10831	7550	7195	SEC61A1
795	ENSG00000058272	1783	2428	3522	1795	2466	1745	1219	2211	2333	2889	2524	1751	1571	2274	2870	5258	2225	4416	4762	2641	1591	599	1364	2415	2512	2047	2202	2351	2414	PPP1R12A
796	ENSG00000058335	3	12	38	16	11	18	7	20	18	43	26	28	8	21	36	6	6	10	4	10	0	8	23	39	11	14	10	32	18	RASGRF1
797	ENSG00000058404	1	38	13	4	185	60	24	90	31	82	20	78	14	32	61	24	6	11	16	77	19	3	9	70	65	6	344	24	29	CAMK2B
798	ENSG00000058453	453	2248	852	453	935	739	579	1275	995	1355	1443	843	659	2216	1391	356	255	187	356	1275	762	94	239	692	984	816	694	826	765	CROCC
799	ENSG00000058600	1206	1390	1919	1007	2272	1187	1003	1929	2130	2214	1908	1050	1124	2904	2137	1093	811	999	1141	2084	1221	663	1082	1334	1852	1268	2153	1423	1388	POLR3E
800	ENSG00000058668	6330	13937	10896	6503	14328	4556	4321	6654	7292	7938	6318	3762	3814	9443	12378	6108	3920	4502	7413	7170	4255	2495	3428	4718	9289	5816	6881	8284	8817	ATP2B4
801	ENSG00000058673	4723	6299	7691	4393	9509	5035	3847	6536	6813	6854	8502	4207	4439	7757	8930	7154	3981	5776	6844	7443	6387	1582	5144	5096	7019	5153	7221	5661	6580	ZC3H11A
802	ENSG00000058729	844	520	883	502	809	558	417	741	768	941	560	534	471	797	769	693	344	587	605	842	660	527	626	490	717	653	785	749	750	RIOK2
803	ENSG00000058799	842	542	1173	651	1061	526	324	653	723	1010	798	552	848	1384	1018	454	293	330	412	825	726	1012	1410	976	1032	683	925	663	809	YIPF1
804	ENSG00000058804	1078	1366	1694	739	2401	1122	634	1458	1780	2041	1432	1344	983	2021	1626	894	379	674	694	1761	764	788	827	974	1566	2156	1879	1109	1075	TMEM48
805	ENSG00000058866	15	26	62	23	48	27	38	33	27	75	42	31	34	11	33	98	80	105	134	21	19	9	172	107	65	42	18	43	51	DGKG
806	ENSG00000059122	1016	1231	1390	798	1916	957	857	1233	1377	2437	2818	776	996	2330	2495	321	299	274	318	2402	1873	365	798	1135	2505	1250	1254	1558	1358	FLYWCH1
807	ENSG00000059145	338	573	567	320	617	600	425	702	652	1296	1322	446	487	978	1007	231	234	209	299	811	385	139	581	760	611	373	651	561	516	UNKL
808	ENSG00000059377	115	79	287	163	147	125	67	114	161	458	218	208	148	120	259	86	138	86	104	138	57	325	186	258	135	104	191	120	142	TBXAS1
809	ENSG00000059378	1380	601	1658	862	2886	942	1071	1109	1262	3205	1091	2139	1561	1227	4420	474	457	352	673	1612	682	895	1664	1799	1033	1049	696	1455	1136	PARP12
810	ENSG00000059573	1538	2136	2926	1474	2273	1619	1356	2092	2719	2970	1525	1238	1407	1323	2112	1065	716	853	976	1664	1013	1233	774	1160	1916	1627	2581	1416	1594	ALDH18A1
811	ENSG00000059588	1837	2482	2655	1413	3270	1475	1300	1418	1834	3007	2635	3276	1194	2957	3566	1929	1208	1719	2285	3103	2073	265	1317	1852	1937	1310	2070	1684	1652	TARBP1
812	ENSG00000059691	1075	499	1090	709	1467	874	467	931	1402	1302	718	464	567	793	762	480	339	381	535	1043	807	824	1424	627	2075	728	1125	1248	813	PET112
813	ENSG00000059728	5612	1611	5404	2167	2155	2032	1342	2339	4014	4714	4707	1581	6824	2219	4776	766	394	602	639	5466	4818	3020	3502	1505	2978	4688	2679	2699	2513	MXD1
814	ENSG00000059758	1302	1036	2041	1065	1274	1001	670	1237	1246	1494	1527	1029	1008	1378	1519	1624	726	1416	1739	1522	1340	598	925	1468	1270	1295	1096	1440	1618	CDK17
815	ENSG00000059769	270	179	373	209	426	303	239	345	475	596	374	242	445	505	418	211	87	178	213	369	382	263	325	283	449	353	579	324	357	DNAJC25
816	ENSG00000059804	798	720	1258	738	282	379	265	220	441	1572	586	390	409	562	976	332	363	298	401	246	364	502	570	886	464	197	405	665	1830	SLC2A3
817	ENSG00000059915	80	538	69	34	114	78	96	72	131	90	56	64	67	70	103	21	11	15	10	106	92	48	43	83	82	37	79	86	82	PSD
818	ENSG00000060069	1134	839	1707	926	1781	792	712	1033	1410	1570	1905	722	797	1361	1526	313	226	246	242	1176	1097	547	547	811	1627	1062	1429	1192	1263	CTDP1
819	ENSG00000060138	12218	7800	12832	8118	12042	7488	6574	9907	14693	15758	12846	7758	11776	11418	14812	5580	3138	4404	3452	10136	10978	12342	9999	7235	13570	8020	9549	9566	10027	YBX3
820	ENSG00000060140	193	90	232	126	335	162	106	244	275	395	224	239	240	158	278	105	47	63	91	176	251	103	246	170	131	209	68	147	121	STYK1
821	ENSG00000060237	15218	21942	23153	12393	16243	6088	6561	9224	13757	10617	18860	7771	10067	9815	15566	6463	5661	6041	9858	19615	12324	5090	5197	8242	20625	13177	16236	15792	15248	WNK1
822	ENSG00000060303	0	0	0	0	0	0	0	0	0	0	0	0	0	0	0	1	0	0	0	0	0	0	0	1	1	0	0	0	0	RPS17P5
823	ENSG00000060339	3104	2790	4790	2429	4177	2852	1994	3935	3700	4013	3707	2164	2115	3710	3890	2562	1380	2098	2414	4628	2730	812	1391	2600	3952	3565	3696	2938	2823	CCAR1
824	ENSG00000060491	1442	794	1391	794	2488	948	869	1134	1254	2830	2081	1350	1227	1289	2071	301	282	246	306	1761	841	668	912	1614	1130	1147	1278	1465	1188	OGFR
825	ENSG00000060558	6300	1035	3556	1832	2365	2075	1385	2403	4115	4296	2770	1590	3263	1681	2907	375	291	217	478	2621	3487	5101	2877	2791	3633	2424	3128	3160	2474	GNA15
826	ENSG00000060566	0	0	2	1	0	0	1	0	0	0	2	2	0	1	2	0	0	1	0	0	0	0	1	0	0	0	0	0	0	CREB3L3
827	ENSG00000060642	347	282	479	253	575	398	233	546	539	413	307	273	360	438	530	268	229	237	292	582	287	432	609	385	768	367	787	446	307	PIGV
828	ENSG00000060656	691	1225	488	334	1145	539	420	741	974	1259	668	319	305	899	1065	289	214	209	261	841	477	450	216	322	1662	763	717	968	1289	PTPRU
829	ENSG00000060688	1202	909	1509	755	2057	836	517	1234	1333	1850	1114	1117	1134	1478	1589	727	423	569	632	1298	852	1482	1608	1187	1171	1563	1424	1116	979	SNRNP40
830	ENSG00000060709	60	367	130	93	325	226	224	641	257	145	292	205	275	164	149	123	37	43	115	287	360	44	236	140	153	220	80	245	211	RIMBP2
831	ENSG00000060718	49	1942	1360	581	220	174	102	92	276	133	285	213	264	83	218	631	69	286	221	65	20	169	84	50	203	405	65	442	1018	COL11A1
832	ENSG00000060749	2146	2867	3756	1822	3550	1634	1138	2143	2665	2329	2652	1340	2182	2788	2792	3607	1548	2937	3369	3419	2109	1004	1206	1634	3379	3387	3910	2971	2800	QSER1
833	ENSG00000060762	621	621	830	473	669	668	533	949	693	921	640	913	494	1186	855	762	307	604	582	865	684	753	1362	1330	1311	623	3241	607	757	MPC1
834	ENSG00000060971	1744	543	2113	1030	1302	1046	666	1572	1266	1444	1376	434	1340	1631	1238	439	236	262	326	1412	1167	1251	1414	1703	1809	964	4854	1045	1104	ACAA1
835	ENSG00000060982	107	129	401	227	218	137	72	96	178	466	151	106	117	142	325	751	265	422	681	69	16	189	195	212	226	97	259	314	447	BCAT1
836	ENSG00000061273	2722	2312	3050	1726	2324	2361	1856	2701	3041	5327	3948	1987	2142	2357	4739	641	672	595	746	3082	2098	966	1568	2193	2549	2034	2083	2308	2647	HDAC7
837	ENSG00000061337	543	781	864	540	890	470	310	570	715	807	738	295	134	407	726	111	33	95	48	535	343	125	174	408	1366	1011	3474	580	759	LZTS1
838	ENSG00000061455	4	13	11	7	23	9	7	16	11	11	10	9	7	59	23	28	23	24	41	10	12	2	11	22	15	7	3	14	20	PRDM6
839	ENSG00000061492	0	1	0	0	0	2	0	5	1	1	0	1	0	0	0	0	0	0	1	0	0	0	0	2	0	1	0	1	0	WNT8A
840	ENSG00000061656	17	23	31	5	47	72	29	36	40	45	79	100	36	47	222	22	25	15	26	15	10	94	91	76	37	22	45	28	19	SPAG4
841	ENSG00000061676	10875	7263	11219	5769	10284	6556	5341	9458	10505	9547	13067	4589	8974	11363	11310	9046	4923	7062	7794	11967	10006	5560	6162	8080	13046	11947	12158	10349	9965	NCKAP1
842	ENSG00000061794	1354	871	1795	947	1008	864	668	1346	1425	1942	1035	1051	1263	1321	1385	813	370	599	643	1519	1180	1312	1856	1239	1867	1383	2934	1180	1138	MRPS35
843	ENSG00000061918	301	152	581	297	249	222	138	135	264	442	263	181	136	182	354	237	111	232	250	162	98	213	155	184	224	132	188	296	496	GUCY1B3
844	ENSG00000061936	2276	1916	2617	1352	2340	2037	1665	2625	2733	3276	2762	2112	1675	3250	3692	1585	998	1382	1579	3264	2549	497	1275	2513	2473	1948	2193	1928	2042	SFSWAP
845	ENSG00000061938	3088	2289	3042	1389	2706	2448	2299	3612	4129	4698	6984	1530	2521	3813	5400	559	485	401	474	4811	3398	453	987	1928	3511	3781	2439	2755	2388	TNK2
846	ENSG00000061987	2078	2133	2994	1741	2748	1892	1413	2272	1926	2687	2285	1573	1458	3415	3374	5519	2427	4467	4988	2919	1996	567	1888	1913	3227	2334	3021	2556	2495	MON2
847	ENSG00000062038	19761	7493	10948	6865	6928	5017	3161	4304	13551	13902	7080	2070	13030	3012	9584	756	306	500	565	6541	7754	8963	2163	1829	10057	7169	3407	8559	5800	CDH3
848	ENSG00000062096	89	48	83	72	337	509	163	466	482	232	211	31	79	292	267	106	45	29	148	133	34	151	228	166	98	26	421	98	70	ARSF
849	ENSG00000062194	1498	2564	2843	1492	3422	1857	1282	2278	2057	2693	1942	1444	1545	3069	2532	2638	1349	2373	2536	2385	1436	1075	1984	1946	3036	1789	2510	2269	2085	GPBP1
850	ENSG00000062282	2810	1701	3267	1823	2959	4478	3037	9481	3852	2427	2944	1390	2987	3235	3643	3432	1416	1942	1446	2903	2790	4977	4698	13502	16113	2411	47632	2580	4706	DGAT2
851	ENSG00000062370	70	213	66	56	154	92	86	168	124	118	102	54	62	93	210	300	194	272	245	144	118	54	120	93	122	98	121	122	81	ZNF112
852	ENSG00000062485	6165	3398	7663	3659	5529	5282	3547	7584	7715	8650	6356	3031	4500	6293	7787	1608	1088	1333	1268	6551	4130	4470	4078	6946	7304	5385	15899	5098	4508	CS
853	ENSG00000062524	24	132	61	29	41	89	58	73	46	75	61	65	18	40	118	13	7	11	7	38	24	10	40	48	31	2	15	21	24	LTK
854	ENSG00000062582	9	7	18	9	15	11	7	16	11	26	10	17	12	18	19	22	9	14	10	17	12	18	9	16	15	14	13	9	15	MRPS24
855	ENSG00000062598	1038	1456	2335	1218	1737	971	997	1517	1661	2052	1573	691	1046	1657	1836	714	532	560	832	1431	905	595	1058	1202	1137	915	1289	1395	1188	ELMO2
856	ENSG00000062650	2818	2544	4816	2512	4180	2498	1881	3370	4264	3634	3549	1760	1702	3573	3584	3888	2030	3276	3721	3759	3053	1074	1274	2834	4491	3525	4240	2971	3251	WAPAL
857	ENSG00000062716	5171	2058	5112	2727	2628	3929	2434	3220	4627	5646	4163	3732	8012	2729	4527	2091	1026	1296	1832	4222	7477	3199	7393	4722	3278	4289	4202	3987	3502	VMP1
858	ENSG00000062725	915	1688	1935	1025	1797	1094	906	1495	1494	1392	1494	739	1187	1080	1480	1821	855	1546	1764	1568	1071	610	1054	1386	1493	1414	2067	1519	1473	APPBP2
859	ENSG00000062822	887	660	696	359	1747	598	469	1011	1057	1448	935	984	547	1448	1098	147	65	71	63	1292	387	197	385	462	672	789	545	686	492	POLD1
860	ENSG00000063015	3	5	2	0	4	3	0	2	1	5	1	8	0	0	8	38	18	23	27	6	2	1	6	3	6	4	9	2	2	SEZ6
861	ENSG00000063046	6410	7296	12109	6884	14287	7195	5821	8873	8040	11568	9357	5570	5462	9562	11656	12169	9216	9944	10953	7873	6280	6055	7304	8995	11483	6949	16095	9714	9286	EIF4B
862	ENSG00000063127	12	59	46	26	71	55	42	64	42	76	75	74	31	138	138	49	48	45	73	42	12	10	39	72	33	42	20	38	39	SLC6A16
863	ENSG00000063169	431	463	636	333	709	515	447	738	841	1199	1025	478	464	668	970	30	31	35	37	732	369	159	240	618	651	612	712	537	510	GLTSCR1
864	ENSG00000063176	253	231	383	183	240	202	131	222	317	508	307	190	159	216	349	49	36	42	43	368	178	106	147	262	212	216	283	243	187	SPHK2
865	ENSG00000063177	12122	8589	10717	6267	13187	7835	7314	8784	9002	15395	10230	9042	8332	12203	11056	7244	5365	5172	4331	8506	10312	24199	21710	15466	16678	9720	24888	10429	11255	RPL18
866	ENSG00000063180	66	287	306	166	483	223	200	387	196	250	312	189	153	202	252	112	86	115	76	407	257	128	188	321	298	173	270	229	239	CA11
867	ENSG00000063241	1141	549	1060	555	1332	826	574	920	1089	1328	839	899	715	1212	1070	167	97	86	102	964	559	1326	1324	1066	1023	750	2433	836	832	ISOC2
868	ENSG00000063244	4894	3320	6405	3241	6125	3465	2356	4821	5619	7293	5671	3429	3755	4447	5343	588	465	416	499	6130	3098	2943	2926	3267	5037	4561	5926	4604	3625	U2AF2
869	ENSG00000063245	7886	2471	6671	3361	4729	2678	2140	3877	6714	6633	5453	2588	4378	4352	4506	233	162	155	135	4787	3883	5542	3072	3021	4199	4708	4863	4080	3833	EPN1
870	ENSG00000063322	1309	1187	2229	1099	1886	1050	855	1305	1465	2277	1639	972	1034	1546	1654	361	290	295	336	1453	946	758	1013	1388	1792	1348	1562	1397	1158	MED29
871	ENSG00000063438	306	340	508	350	384	383	281	343	409	494	517	289	247	422	752	160	160	155	182	613	285	95	273	625	271	93	182	293	451	AHRR
872	ENSG00000063515	0	1	1	2	43	3	4	2	10	20	1	9	8	3	5	0	0	0	0	33	3	0	1	2	0	1	8	14	4	GSC2
873	ENSG00000063587	291	419	675	375	510	342	282	334	495	572	579	392	155	261	789	146	115	140	167	325	159	231	350	612	390	471	363	433	627	ZNF275
874	ENSG00000063601	1814	2081	2873	1558	3250	1794	1659	2291	3191	3068	2904	2085	1800	3386	3045	1416	693	953	1449	2704	2136	1129	1659	2459	2887	2231	2793	2203	1733	MTMR1
875	ENSG00000063660	4676	8770	4419	2695	7718	4090	5621	8607	7324	8270	8231	1600	2820	5950	6220	924	556	667	953	5025	3164	2027	1504	3563	6800	4726	11404	6365	5897	GPC1
876	ENSG00000063761	172	194	368	193	487	342	186	578	312	421	270	241	197	290	382	151	66	117	104	316	178	146	171	451	675	208	1206	287	267	ADCK1
877	ENSG00000063854	545	315	754	331	687	335	321	515	471	669	742	306	341	717	622	254	228	185	215	623	540	433	896	753	599	251	840	554	413	HAGH
878	ENSG00000063978	1932	1567	2636	1472	2323	1480	1031	1813	1971	3202	2211	1795	1760	2186	2861	777	662	729	943	2077	1679	1743	2010	2372	2192	1687	2952	2171	1763	RNF4
879	ENSG00000064012	856	460	1708	796	1305	978	780	1080	1183	3392	1949	1604	999	1243	2087	561	546	570	728	1434	673	456	1880	2233	955	533	803	963	785	CASP8
880	ENSG00000064042	1649	562	2893	1673	2595	1156	632	1398	1791	2128	3620	949	1425	786	2338	1441	1127	1230	2292	2320	3528	383	1453	739	2122	770	453	3964	1928	LIMCH1
881	ENSG00000064102	993	587	1434	718	805	755	527	1196	1232	1456	754	646	961	963	1253	635	369	454	586	1098	712	799	737	728	1052	1085	1086	897	703	ASUN
882	ENSG00000064115	2245	2090	3004	1522	2238	1392	1059	1795	2556	2634	2212	1592	1568	2369	2403	1660	742	1096	1111	2860	1636	1333	2786	1794	2443	1334	3065	2251	2220	TM7SF3
883	ENSG00000064195	1443	958	2138	828	1445	875	627	1208	1584	844	1988	481	1538	1716	2022	267	133	152	134	1957	1268	786	692	666	1648	1203	1012	1428	1003	DLX3
884	ENSG00000064199	95	102	127	51	118	69	51	100	87	116	61	70	65	113	91	29	16	25	31	98	34	35	114	78	117	58	79	82	78	SPA17
885	ENSG00000064201	27	18	76	27	18	74	64	50	72	210	87	96	22	53	229	29	34	13	29	26	11	9	43	93	21	14	21	51	39	TSPAN32
886	ENSG00000064205	150	223	842	688	502	329	253	223	291	1222	2878	1102	162	231	687	913	892	606	1421	93	21	332	615	575	679	109	167	132	1954	WISP2
887	ENSG00000064218	5	5	22	19	103	1	3	2	0	4	13	14	6	2	21	0	0	0	6	3	6	3	3	0	3	8	1	11	41	DMRT3
888	ENSG00000064225	705	509	438	310	654	417	488	537	524	667	467	388	389	463	784	1215	849	1208	1384	641	720	269	579	531	568	545	472	754	488	ST3GAL6
889	ENSG00000064270	1107	1149	517	349	1046	1146	732	1407	2307	1508	1717	468	820	867	1881	679	439	527	577	1091	1352	703	259	432	1564	936	1292	1160	1070	ATP2C2
890	ENSG00000064300	136	268	256	139	181	297	127	610	178	272	447	71	276	102	279	81	28	42	38	251	73	161	46	69	271	528	469	705	468	NGFR
891	ENSG00000064309	269	2250	1434	952	2313	731	572	804	634	567	1283	357	154	311	682	2448	1634	1832	2480	699	636	118	650	582	875	267	575	970	1636	CDON
892	ENSG00000064313	1563	1240	2717	1236	3697	1156	850	1607	1823	2521	2028	1789	1502	1951	2322	1684	842	1304	1323	1926	1351	671	1254	1181	1800	2801	2150	1627	1471	TAF2
893	ENSG00000064393	3527	2811	5218	2256	2475	1430	886	1893	2535	2330	3116	3145	1768	1497	2362	628	427	626	911	3482	2072	1122	626	2089	4481	4049	7365	3224	3070	HIPK2
894	ENSG00000064419	1673	1412	2777	1210	2413	1356	1017	1712	2049	2702	1863	1618	1540	1889	2738	1337	907	1008	1323	1996	1015	859	1072	1398	2238	2269	2647	1781	1370	TNPO3
895	ENSG00000064489	1	0	1	0	1	1	4	5	4	1	7	1	0	0	2	0	1	1	1	2	0	0	0	3	0	2	1	0	3	MEF2BNB-MEF2B
896	ENSG00000064490	603	397	676	360	766	357	289	513	443	691	596	488	396	717	652	171	118	144	136	603	464	469	596	603	520	548	717	494	365	RFXANK
897	ENSG00000064545	552	470	650	335	880	509	327	699	763	864	743	600	543	798	761	99	74	69	67	725	382	397	407	485	751	599	956	544	493	TMEM161A
898	ENSG00000064547	401	488	481	235	494	391	354	438	481	854	657	307	348	525	792	118	53	64	64	477	374	494	472	582	628	460	877	495	483	LPAR2
899	ENSG00000064601	4853	2418	5567	3180	4563	4255	2623	3818	5746	5565	6063	2407	3558	4507	5547	1331	921	882	1040	4402	3295	4983	3450	4008	6169	3920	7991	4711	3886	CTSA
900	ENSG00000064607	1815	1083	2042	920	1869	1804	1385	2206	2394	2725	2319	1591	997	2948	3111	1067	756	845	1029	2797	1559	278	1394	1664	1484	1541	1555	1684	1175	SUGP2
901	ENSG00000064651	846	1237	1711	967	1238	968	614	1237	1269	931	1222	494	756	638	1081	6349	5622	9776	9351	1247	1124	444	589	887	1739	1202	3399	1805	2003	SLC12A2
902	ENSG00000064652	548	323	718	409	622	367	330	464	569	501	453	237	418	743	663	668	306	479	760	781	706	573	538	278	556	294	280	582	627	SNX24
903	ENSG00000064655	103	66	206	91	869	136	146	77	104	863	181	421	109	473	604	46	47	53	75	87	248	160	254	267	207	258	104	307	127	EYA2
904	ENSG00000064666	5423	2819	5580	3074	3625	2757	1863	3439	5971	7385	6052	1887	4447	3040	5395	512	429	368	429	3628	3190	5476	3758	3145	5637	2900	3351	4141	3654	CNN2
905	ENSG00000064687	726	280	1469	698	981	1379	1020	1537	1782	2202	1614	631	606	1847	2640	170	168	92	186	1341	625	113	613	1039	867	272	1294	996	662	ABCA7
906	ENSG00000064692	39	194	298	111	138	139	310	182	127	101	138	108	69	103	280	124	136	179	195	138	189	113	255	267	160	129	156	223	278	SNCAIP
907	ENSG00000064703	559	745	1049	523	1325	561	445	833	828	1044	786	583	472	1008	897	531	283	490	507	820	644	389	584	718	777	826	830	694	637	DDX20
908	ENSG00000064726	1960	1628	3519	1888	2986	1426	1211	2023	1959	3119	2259	1462	1703	2511	3064	1529	627	1268	1413	2282	2514	1652	2627	2716	2905	2211	2989	2240	2423	BTBD1
909	ENSG00000064763	101	119	266	122	298	712	489	2360	89	259	99	105	52	96	173	1421	264	535	527	102	78	270	605	3730	3472	158	15516	125	565	FAR2
910	ENSG00000064787	8	19	59	34	53	18	23	10	6	92	19	9	48	39	24	75	56	59	70	21	23	12	59	88	21	20	19	43	60	BCAS1
911	ENSG00000064835	0	0	1	0	3	1	1	3	0	2	0	0	0	1	1	6	3	9	7	1	1	0	2	0	0	0	1	1	1	POU1F1
912	ENSG00000064886	580	375	333	246	837	2621	977	1779	1836	2227	273	174	599	2533	3599	227	130	131	1106	310	100	1527	2866	1656	2395	314	9422	544	568	CHI3L2
913	ENSG00000064932	6714	2193	5254	3236	3843	4346	2369	3988	7646	11773	5780	2322	5613	4482	7636	383	332	272	359	3471	6118	2351	2942	3410	4088	3101	6208	5764	4633	SBNO2
914	ENSG00000064933	343	374	586	395	572	478	301	637	607	582	391	411	277	441	592	727	277	593	790	870	312	132	483	391	417	340	335	416	325	PMS1
915	ENSG00000064961	2095	1409	1544	801	2204	1319	1417	2022	2192	2816	3286	3776	1703	3418	2482	548	301	357	399	2372	2760	1562	1990	2569	3094	1338	3678	1457	1672	HMG20B
916	ENSG00000064989	1488	539	2151	1242	765	818	436	563	905	750	476	397	493	465	958	958	423	979	1075	838	1246	959	670	846	1105	1538	1019	1706	1387	CALCRL
917	ENSG00000064995	792	762	1016	503	1145	577	458	768	865	969	861	718	802	1474	1005	481	276	405	433	927	915	634	897	959	1029	792	749	678	664	TAF11
918	ENSG00000064999	2502	2999	4285	2142	2972	1904	1321	2465	3307	2973	3023	1671	2025	3506	3250	756	670	622	894	2981	1760	879	1663	1729	2718	2097	2766	2296	2212	ANKS1A
919	ENSG00000065000	5339	3390	6892	3318	5233	4214	2485	4741	7631	9516	5912	3143	3772	5958	7225	746	604	574	597	5054	3455	2205	2115	3870	4940	2799	6710	4516	3701	AP3D1
920	ENSG00000065029	608	650	777	393	1239	795	572	1003	938	1250	1012	737	680	1146	1271	219	216	219	260	1050	619	267	738	917	929	653	717	602	576	ZNF76
921	ENSG00000065054	856	314	659	405	586	403	257	438	522	843	691	509	285	319	414	90	63	78	53	576	360	543	567	606	398	310	527	410	602	SLC9A3R2
922	ENSG00000065057	140	126	162	95	216	126	80	153	162	204	166	147	113	160	155	78	42	28	48	161	89	119	141	150	150	160	220	88	128	NTHL1
923	ENSG00000065060	790	1294	1755	861	2292	595	520	729	936	1137	764	835	542	1122	1296	809	523	758	1083	1323	577	367	684	1206	1569	1109	1730	1213	1076	UHRF1BP1
924	ENSG00000065135	7311	3654	7451	3931	8099	4241	2995	4852	7285	7414	5751	2970	5305	4699	6716	4474	2067	3092	3329	5951	7104	7232	4915	4286	6542	6877	6572	6255	5799	GNAI3
925	ENSG00000065150	4424	5068	6930	3627	8661	3663	2724	4855	6076	8163	4447	3732	3775	5897	4909	3110	1891	2513	2714	4984	3140	3476	2612	3475	4706	4198	6342	4093	4432	IPO5
926	ENSG00000065154	2230	2051	5220	2594	4544	2211	2161	3320	3170	2547	3149	1563	1648	2135	2563	2446	1249	1905	2035	3167	2753	2300	1815	3039	4007	3317	7216	2506	3506	OAT
927	ENSG00000065183	1193	1328	2265	1206	3078	1422	899	1693	2397	2210	1177	1127	1243	1820	1887	1005	648	802	842	2331	954	988	817	1271	1912	1977	2827	1398	1263	WDR3
928	ENSG00000065243	1818	1975	2690	1497	3157	1753	1256	2341	2320	2257	2168	1863	1746	2878	2613	2935	1294	2356	2600	2930	2142	722	1600	2095	2554	2630	2548	2035	2044	PKN2
929	ENSG00000065268	927	493	1053	510	1031	487	343	805	828	1769	1122	763	593	881	909	59	45	58	56	860	663	970	874	722	742	359	1002	592	538	WDR18
930	ENSG00000065308	1355	2022	2466	1264	1994	1226	754	1450	1348	1564	2134	867	1029	1043	2010	752	586	539	736	1228	536	579	686	872	995	1467	720	1800	1664	TRAM2
931	ENSG00000065320	387	834	426	228	242	292	236	274	334	649	392	90	169	77	360	238	370	145	155	126	139	137	53	217	500	153	456	359	500	NTN1
932	ENSG00000065325	2	1	4	4	0	4	1	4	28	7	2	2	2	1	2	8	3	7	13	2	2	3	3	3	2	1	4	2	1	GLP2R
933	ENSG00000065328	417	248	428	199	718	243	153	415	617	505	292	348	214	201	259	187	33	57	70	623	123	86	167	195	152	485	251	296	189	MCM10
934	ENSG00000065357	3518	1768	3802	1868	3103	3070	2559	4747	4007	5279	4165	2195	2771	6892	6751	1705	1328	1265	1934	4733	3766	1321	3118	4951	2690	2449	1861	2861	2417	DGKA
935	ENSG00000065361	4438	3982	4911	2415	5119	3821	3159	5210	6001	4877	6709	1568	3505	6083	5770	3542	2453	3064	3467	7267	3622	1456	2472	5587	6496	4839	5736	3636	3726	ERBB3
936	ENSG00000065371	0	36	0	1	4	0	0	0	1	1	2	2	0	2	4	9	10	16	17	0	0	1	2	4	16	0	14	0	9	ROPN1
937	ENSG00000065413	153	129	807	331	308	195	160	147	211	520	341	346	101	172	645	739	634	661	889	268	166	76	321	533	327	150	161	536	321	ANKRD44
938	ENSG00000065427	4697	2496	5126	2522	4428	2741	1726	3630	3989	5437	2451	3665	3797	3239	3857	2077	1405	1625	1695	4110	2803	4631	4583	3466	4190	3071	4919	3307	3140	KARS
939	ENSG00000065457	638	671	1105	520	727	470	377	651	841	818	479	382	449	521	688	373	280	325	376	929	496	221	522	638	1037	512	774	769	724	ADAT1
940	ENSG00000065485	442	449	678	352	667	342	220	279	512	705	391	324	255	233	586	226	199	240	300	369	231	387	225	208	305	446	358	324	488	PDIA5
941	ENSG00000065491	701	582	851	494	1122	433	400	636	719	885	865	517	718	1228	889	393	262	296	371	796	628	396	566	625	910	709	847	586	662	TBC1D22B
942	ENSG00000065518	2952	1414	2884	1475	2865	1416	996	1992	1783	2400	2296	1695	2733	2400	2399	931	534	745	764	2587	2392	3645	4168	2387	2781	2390	3445	2084	2110	NDUFB4
943	ENSG00000065526	3150	4591	5912	2753	6743	2086	1552	2542	3226	4119	4419	2653	2180	3898	4923	1817	1254	1654	2758	6002	3146	958	1401	3239	5496	4606	6104	4907	4289	SPEN
944	ENSG00000065534	1261	5928	2794	1660	1587	1355	817	2092	855	1683	3401	1231	998	2213	1978	4021	1558	2378	2883	724	1218	633	972	1780	1828	1161	3788	1657	3005	MYLK
945	ENSG00000065548	2158	1339	2117	1250	2033	1736	1136	2314	2275	2384	2014	1215	1820	2100	2356	1709	725	1318	1412	2636	2327	1461	1962	1686	2562	1674	2420	2232	1775	ZC3H15
946	ENSG00000065559	2252	1273	3011	1413	2064	1301	995	1894	2422	1912	2428	894	1308	1459	1813	1626	921	1314	1481	2434	2296	1476	1592	1580	1896	1396	2590	1937	1881	MAP2K4
947	ENSG00000065600	393	344	469	256	314	177	104	208	308	286	264	115	217	214	293	142	83	136	134	343	185	141	272	227	230	283	273	230	207	TMEM206
948	ENSG00000065609	1	19	0	0	26	1	0	1	2	4	1	16	2	3	0	3	1	8	3	1	1	0	4	5	6	0	2	6	1	SNAP91
949	ENSG00000065613	8340	5058	11088	5286	7665	4941	4385	6660	8137	8710	11986	3453	5851	10983	7650	7621	3807	5715	7107	10720	7536	2227	2321	5506	13963	12510	9862	7005	7194	SLK
950	ENSG00000065615	954	515	1151	599	539	498	305	605	707	816	825	488	880	421	856	541	225	413	533	820	1002	962	1277	800	1271	896	837	929	810	CYB5R4
951	ENSG00000065618	64788	28119	88784	49626	81963	32565	18311	89453	54824	42379	57751	9496	42863	22652	61578	21280	10698	12962	15829	115302	66416	26477	12580	6260	86880	57958	21780	88280	72570	COL17A1
952	ENSG00000065621	653	735	602	285	1152	522	573	848	777	699	663	689	341	659	640	648	384	613	616	974	599	338	532	646	904	714	862	415	580	GSTO2
953	ENSG00000065665	222	329	391	226	269	242	181	254	279	485	393	212	197	306	429	236	160	227	287	427	266	74	266	315	346	250	252	262	216	SEC61A2
954	ENSG00000065675	236	46	192	112	147	190	131	353	514	309	378	183	301	108	285	41	51	34	77	142	172	261	191	661	291	283	93	191	136	PRKCQ
955	ENSG00000065717	157	2523	231	156	615	342	197	648	673	343	329	340	112	237	267	136	108	104	85	368	171	233	151	194	284	113	161	183	378	TLE2
956	ENSG00000065802	626	893	1203	660	1093	645	471	940	1046	1135	1159	406	516	997	1169	487	460	406	465	1090	547	356	507	650	857	677	697	868	932	ASB1
957	ENSG00000065809	878	1024	2523	1479	1047	740	600	612	561	2231	1049	825	496	791	1997	1527	943	1104	1330	667	1488	1181	1747	2104	1394	942	1093	1466	1317	FAM107B
958	ENSG00000065833	4286	1579	3690	1670	1755	3169	1625	5738	4690	2783	3347	693	5339	1628	1696	1716	485	862	996	2858	2400	2836	2140	4536	4801	3147	8256	2916	2909	ME1
959	ENSG00000065882	1110	1128	1414	723	892	583	326	601	731	1466	1533	1074	642	580	1189	641	383	453	620	372	628	872	810	876	2254	1275	682	849	1080	TBC1D1
960	ENSG00000065883	1948	1832	3564	1875	3167	2081	1613	2471	3272	3527	3061	1597	1818	2635	2903	2330	1342	1946	2505	2713	1905	884	1654	2064	2971	2789	2920	1964	1979	CDK13
961	ENSG00000065911	1108	527	1241	721	2729	864	592	846	1129	1818	722	1284	770	1303	1408	695	260	475	413	1110	1153	1014	703	815	567	867	1288	1541	1022	MTHFD2
962	ENSG00000065923	128	144	264	117	183	95	136	93	243	145	165	125	93	78	297	156	139	146	279	79	62	78	180	301	255	241	301	184	119	SLC9A7
963	ENSG00000065970	1213	1637	2030	1064	2116	1194	1152	1883	2211	2677	2411	1076	1359	2029	2367	366	278	396	486	1574	1113	569	764	1204	2124	1555	1447	1556	1662	FOXJ2
964	ENSG00000065978	19594	12369	19170	9627	23261	9463	5950	14646	19392	22127	14018	11640	12364	14278	14692	5181	3134	3958	4046	15491	11221	19929	20525	12616	17555	20406	21803	13387	12285	YBX1
965	ENSG00000065989	247	300	852	468	728	309	221	253	383	698	507	322	187	273	568	42	51	36	50	210	110	183	334	431	314	140	196	409	595	PDE4A
966	ENSG00000066027	941	738	1321	801	1391	643	575	913	1100	1171	956	547	910	981	1275	653	285	509	583	1330	1061	716	1175	1027	1274	930	1361	983	987	PPP2R5A
967	ENSG00000066032	4	7	0	1	3	3	2	6	5	5	3	5	2	7	10	4	4	6	1	5	7	4	4	1	17	4	3	9	1	CTNNA2
968	ENSG00000066044	1774	1870	2736	1329	3330	1473	1031	2033	2242	3012	2220	1636	1581	2072	2339	525	370	428	517	1975	1108	1649	1538	1557	1732	1874	2455	1831	1549	ELAVL1
969	ENSG00000066056	439	180	674	331	383	455	285	354	411	453	424	314	158	177	366	143	115	127	207	287	164	195	121	230	402	158	341	417	718	TIE1
970	ENSG00000066084	5334	4085	9134	4235	5325	2332	1614	3182	4023	3607	6539	2913	3475	3619	6536	4512	3003	3111	5003	7454	5201	1854	2277	3236	7418	6077	4006	5180	5537	DIP2B
971	ENSG00000066117	2296	2130	2455	1444	2422	1310	1098	1866	2288	2914	2152	1342	1429	1919	2489	530	379	386	509	1939	1602	1275	1277	1458	2281	1848	1892	1783	1670	SMARCD1
972	ENSG00000066135	825	1164	1937	1075	2595	989	882	1465	1419	1661	1631	520	826	1596	2006	1239	936	1045	1257	1431	832	567	784	987	1664	1196	1536	1280	1101	KDM4A
973	ENSG00000066136	1398	1556	1891	996	3335	1136	764	1441	1486	2199	1570	1337	1106	1788	2047	578	478	602	636	1716	932	1211	1663	1501	1858	1084	1941	1209	1141	NFYC
974	ENSG00000066185	6	2	12	8	20	17	8	22	9	8	10	14	4	12	17	13	15	12	25	7	7	12	30	13	17	2	22	7	12	ZMYND12
975	ENSG00000066230	641	121	231	111	213	846	755	1222	1647	694	790	580	191	244	445	75	54	57	82	612	358	30	92	488	403	447	394	519	234	SLC9A3
976	ENSG00000066248	1573	614	1059	661	988	622	689	1627	1370	1310	1073	491	324	943	1262	243	194	252	167	1922	1321	400	134	197	1892	1171	377	981	935	NGEF
977	ENSG00000066279	1151	1031	888	437	3539	561	372	679	885	1209	944	1845	621	2283	1303	2682	406	1038	1048	1335	438	131	775	697	1467	1521	919	1392	393	ASPM
978	ENSG00000066294	96	210	1494	680	386	371	315	202	290	1036	546	559	215	370	1158	382	465	494	825	214	35	138	760	1707	438	180	376	920	781	CD84
979	ENSG00000066322	9878	3159	8403	3632	5339	5148	2886	7570	8868	6083	8453	1881	5948	4742	6225	2376	1342	1277	1197	8717	7045	10371	5956	8462	7729	5970	20391	5514	5214	ELOVL1
980	ENSG00000066336	291	178	1139	590	434	462	258	312	462	2076	587	382	291	413	1016	55	78	39	42	200	92	1047	935	1084	438	176	487	618	486	SPI1
981	ENSG00000066379	243	191	259	121	279	152	112	208	225	289	180	212	225	327	256	126	101	111	109	242	266	259	342	272	181	236	246	192	182	ZNRD1
982	ENSG00000066382	4	5	21	14	16	3	7	9	1	16	6	8	4	10	9	46	78	59	84	7	5	8	7	29	16	12	13	12	18	MPPED2
983	ENSG00000066405	4	12	15	4	16	11	6	11	6	3	7	3	5	8	26	190	127	90	110	9	4	0	4	2	5	3	17	16	11	CLDN18
984	ENSG00000066422	954	1072	1896	996	2407	1195	895	1559	1722	1582	1416	1002	1194	1523	2020	1561	767	1307	1418	1892	1120	402	1020	1151	1341	1343	1891	1787	1232	ZBTB11
985	ENSG00000066427	799	966	1257	683	1722	809	712	934	976	963	924	737	778	1265	1217	2349	890	1793	2240	907	1006	393	494	888	1169	815	880	1007	1057	ATXN3
986	ENSG00000066455	2233	1820	2666	1491	2465	1334	977	1610	2000	2123	2053	1341	1446	1499	1820	1409	825	1009	1264	1832	2052	1247	1421	1927	2269	1575	2202	1828	1892	GOLGA5
987	ENSG00000066468	2146	6324	4663	2575	7534	2505	1549	4363	3422	2898	5590	676	1306	2196	3361	4153	1987	2871	3652	4972	2504	463	877	2738	3259	1526	2395	2277	3667	FGFR2
988	ENSG00000066557	658	601	859	452	851	470	342	575	627	779	596	666	501	704	780	759	244	607	685	789	562	368	563	619	772	714	732	500	659	LRRC40
989	ENSG00000066583	531	662	742	424	1094	738	508	1152	828	1002	638	547	424	666	666	501	202	398	398	667	444	763	1314	1063	1425	476	6499	595	704	ISOC1
990	ENSG00000066629	2933	1018	2640	1299	948	648	473	1002	1361	1488	857	637	937	895	1283	1282	815	765	971	2217	1057	777	319	586	766	376	413	1449	1757	EML1
991	ENSG00000066651	235	234	304	167	251	230	155	292	299	449	220	296	270	288	373	608	241	479	426	368	307	124	452	296	255	328	198	268	176	TRMT11
992	ENSG00000066654	1190	1650	2095	1112	2063	1292	1028	1850	1777	2024	1830	1124	1125	1915	1812	1908	1058	1644	1753	1548	1277	712	1371	1841	1995	1312	2361	1539	1530	THUMPD1
993	ENSG00000066697	582	232	513	278	403	259	201	262	349	523	342	178	418	275	564	253	124	148	237	341	468	678	455	415	451	364	494	507	450	MSANTD3
994	ENSG00000066735	169	1524	265	170	776	179	114	173	199	258	274	218	63	439	205	49	43	46	35	114	63	30	33	161	170	122	386	239	287	KIF26A
995	ENSG00000066739	2048	2782	4068	2260	4321	1522	1367	1961	1974	2117	2540	1960	1370	2887	3244	5737	3418	4551	4888	3101	2881	622	1572	2716	4045	2463	3148	3276	3357	ATG2B
996	ENSG00000066777	3147	2687	5774	2848	4882	2291	1896	2924	3539	3661	5442	1546	2609	3282	3868	4902	2536	3617	4555	3834	3398	1206	1959	2403	4663	4500	6084	4063	3578	ARFGEF1
997	ENSG00000066813	0	0	0	1	0	1	0	1	0	1	0	2	0	0	1	2	2	0	5	0	0	0	1	1	0	0	0	0	1	ACSM2B
998	ENSG00000066827	218	189	459	216	572	276	147	268	362	480	363	313	296	285	509	203	142	199	259	297	169	215	226	230	315	352	204	314	218	ZFAT
999	ENSG00000066855	778	827	1230	657	1908	711	535	996	906	1296	1017	845	992	841	1251	607	290	517	553	857	705	760	804	618	1170	1292	1549	971	715	MTFR1
1000	ENSG00000066923	28	216	99	45	207	99	68	105	88	119	120	135	39	185	149	115	131	56	175	106	35	12	96	97	97	60	94	58	87	STAG3
1001	ENSG00000066926	907	680	1045	556	1803	567	422	767	746	995	1406	602	503	1053	1013	477	307	433	420	838	588	613	755	862	1276	602	1166	712	779	FECH
1002	ENSG00000066933	1692	1162	2523	1206	1501	768	645	992	1027	1114	1218	1048	861	1003	1242	5165	2711	4267	5000	1886	1297	419	833	1080	2111	1533	1863	1861	2069	MYO9A
1003	ENSG00000067048	2	2518	4048	2027	2	2441	2538	2364	2803	3587	2527	794	2022	2915	2864	0	0	0	2110	2	2416	770	1756	1540	3225	1721	1951	1	2494	DDX3Y
1004	ENSG00000067057	3953	2009	2393	1185	2439	1930	1457	2672	4029	4541	3698	3285	2314	1519	2798	543	666	524	576	1995	1335	2438	1485	1995	2986	2854	3795	2433	2051	PFKP
1005	ENSG00000067064	1848	1662	3251	1401	2759	1511	1069	2797	1835	1992	2405	1352	2041	1878	2271	1358	310	988	821	3331	4040	2083	2163	3282	4167	2544	9703	2333	2240	IDI1
1006	ENSG00000067066	1942	782	2264	1141	3043	1155	896	1442	1235	3041	1680	1722	1544	1147	3892	1747	1325	1530	2147	2542	1176	1067	2510	2683	1931	900	781	2166	2020	SP100
1007	ENSG00000067082	9176	4663	14879	7994	6899	4663	4638	5605	8623	9116	9657	8418	7321	3779	6949	3583	3106	2879	3286	12611	11082	5630	5113	5787	14439	7489	4787	8607	12817	KLF6
1008	ENSG00000067113	386	501	586	404	363	376	284	358	228	692	675	437	251	305	552	455	294	371	512	239	332	526	443	614	842	362	1130	374	676	PPAP2A
1009	ENSG00000067141	1012	2907	2671	1769	5155	2078	1840	3351	2629	2765	2492	1845	1108	3462	3712	2301	1407	1672	2495	1572	1318	800	1058	1607	4647	2121	3834	2669	2732	NEO1
1010	ENSG00000067167	3401	3227	6171	3070	5194	2813	2278	3029	3433	5949	4723	2519	3077	3078	4414	2964	1581	2211	2687	2965	2724	4407	4460	3769	4821	4153	6064	4277	4546	TRAM1
1011	ENSG00000067177	519	613	627	384	605	367	472	471	616	693	692	477	467	660	871	444	263	336	355	834	599	205	467	324	922	632	336	716	546	PHKA1
1012	ENSG00000067182	5274	2240	6660	3730	5235	2852	1994	3693	4403	6226	4084	2153	4906	4264	4284	1001	898	870	801	3703	4310	3911	3883	3303	4550	3623	5904	4536	4404	TNFRSF1A
1013	ENSG00000067191	105	591	198	105	256	228	337	340	238	541	322	231	78	181	361	144	136	139	222	311	172	43	205	425	259	206	329	170	381	CACNB1
1014	ENSG00000067208	970	926	1717	840	1267	664	562	888	940	1080	1017	371	596	995	1236	2125	1200	1829	2156	1109	964	484	726	869	1071	805	1146	915	1188	EVI5
1015	ENSG00000067221	434	223	622	314	450	338	225	478	527	803	241	411	217	461	594	95	81	89	103	509	291	317	422	410	360	338	599	337	281	STOML1
1016	ENSG00000067225	66464	14890	72432	35296	32198	26319	16948	37547	54104	63346	34845	14004	32936	20886	40787	7764	4802	5195	6486	38826	25714	40097	33169	19803	25455	26942	30007	42527	29941	PKM
1017	ENSG00000067248	2256	1574	2280	1235	2159	1498	985	2063	2271	1971	1843	998	1072	1992	2183	1960	915	1485	1605	2389	1500	882	1111	1157	2560	1374	2365	2149	1661	DHX29
1018	ENSG00000067334	2545	1481	3152	1558	2958	1793	1200	2491	2657	2773	2144	1906	1718	2411	2421	1456	851	1196	1352	2814	2643	1478	1913	1944	2954	2248	2161	2144	2088	DNTTIP2
1019	ENSG00000067365	340	270	434	192	314	271	188	349	389	440	545	378	326	504	431	203	162	178	199	496	436	190	329	331	385	364	360	275	271	METTL22
1020	ENSG00000067369	1059	1483	2080	994	1871	1084	743	1386	1495	1340	1034	1123	739	1386	1641	1604	1025	1344	1643	1718	903	315	656	916	1620	1236	1205	1259	1193	TP53BP1
1021	ENSG00000067445	64	766	179	97	169	233	188	327	220	106	123	150	56	130	194	103	45	81	104	96	124	24	92	102	124	80	80	90	185	TRO
1022	ENSG00000067533	921	984	1161	596	1468	634	421	880	1010	1168	829	722	694	990	978	986	378	859	863	1126	784	643	755	667	1247	1115	1227	914	901	RRP15
1023	ENSG00000067560	14673	10016	22759	11116	18398	9522	7433	11958	15368	18485	13935	6474	11417	8982	13283	6364	3893	4740	5226	12155	9686	16223	14442	9347	13222	8885	15657	11640	12356	RHOA
1024	ENSG00000067596	1931	2148	3646	1720	3038	1568	1174	2235	2443	2732	2836	1573	1828	2719	2632	1510	1163	1233	1504	2050	1565	943	1467	1945	2488	1957	2458	2195	2006	DHX8
1025	ENSG00000067601	40	35	42	23	83	34	29	30	27	35	45	25	30	45	41	38	43	45	74	58	27	28	100	48	52	41	36	32	50	PMS2P4
1026	ENSG00000067606	483	339	597	279	732	320	284	486	600	580	526	314	384	707	523	160	118	118	157	618	395	410	366	409	626	434	523	439	377	PRKCZ
1027	ENSG00000067646	1	527	1533	600	0	652	615	795	1129	1068	842	159	584	1563	1020	0	0	0	1080	0	742	304	680	405	1142	813	1057	0	776	ZFY
1028	ENSG00000067704	4536	3995	5558	2968	6446	3097	2687	4637	4490	5389	5163	2853	3069	4365	4758	2964	1985	2229	2294	4130	2967	2473	2911	4032	5842	5038	7865	4363	4339	IARS2
1029	ENSG00000067715	2	238	115	33	88	23	9	9	15	22	31	18	35	52	17	108	38	67	70	28	17	14	11	259	12	5	12	81	24	SYT1
1030	ENSG00000067798	1093	119	906	426	364	398	170	496	451	461	280	98	434	117	287	892	324	981	1222	870	277	523	404	271	401	333	418	574	466	NAV3
1031	ENSG00000067829	1050	587	1303	695	1217	848	685	1194	1156	1723	1307	921	1050	1304	1432	390	285	287	323	1212	701	1044	1134	962	1191	905	1259	865	806	IDH3G
1032	ENSG00000067836	497	381	512	236	435	390	266	642	428	673	699	498	571	1404	497	64	40	56	66	407	514	303	647	442	477	514	318	378	280	ROGDI
1033	ENSG00000067840	110	144	184	147	503	124	165	155	111	249	140	161	49	62	223	72	46	26	61	413	150	51	150	125	114	39	56	273	172	PDZD4
1034	ENSG00000067842	4	5	0	2	42	4	0	3	2	24	1	8	1	30	3	3	0	2	2	4	0	0	0	5	4	1	389	0	1	ATP2B3
1035	ENSG00000067900	2125	2293	5104	2547	3408	1888	1400	2178	2511	3365	4489	1320	1561	2555	3445	3229	1410	2394	3222	2572	1834	664	1197	2603	3184	2244	4188	3426	3394	ROCK1
1036	ENSG00000067955	1328	1767	2923	1490	2157	1482	1137	1864	2204	2899	1539	1531	1592	1505	1752	921	450	920	1121	1830	1464	1290	1775	1798	1930	1539	2031	1785	1713	CBFB
1037	ENSG00000067992	346	223	436	228	277	146	93	126	255	228	220	152	200	129	374	618	614	786	828	176	238	224	192	256	365	214	613	325	306	PDK3
1038	ENSG00000068001	950	705	1106	520	994	547	442	505	763	1008	883	324	533	392	617	156	157	134	141	662	778	1019	670	598	863	574	1198	755	735	HYAL2
1039	ENSG00000068024	2259	1767	2196	1157	1938	1169	1410	2020	3290	2548	1683	846	1500	1391	2060	735	558	539	901	2178	997	610	674	869	1509	1593	993	1581	1728	HDAC4
1040	ENSG00000068028	926	684	1422	789	1802	917	720	983	1308	1868	1427	883	799	1313	1660	363	332	355	377	1675	1139	754	1045	929	1011	770	1313	972	937	RASSF1
1041	ENSG00000068078	15520	11063	8040	6507	16137	7647	5664	11533	12060	24180	14156	5151	4287	31828	11548	3673	2563	2913	3528	11572	6596	1269	5258	9207	9385	4474	8797	9367	8147	FGFR3
1042	ENSG00000068079	600	241	528	311	445	303	191	277	217	987	367	568	444	257	849	102	79	73	124	367	214	563	884	732	278	187	224	452	413	IFI35
1043	ENSG00000068097	612	693	964	480	929	490	358	716	739	716	677	560	511	590	708	448	282	402	468	634	476	230	432	440	514	437	545	613	452	HEATR6
1044	ENSG00000068120	2226	1422	2511	1292	2459	2023	1399	2477	2752	2932	2965	1422	1741	3128	2781	396	240	305	321	2507	1745	1525	1630	2234	2127	1419	3407	1958	1658	COASY
1045	ENSG00000068137	1867	903	2044	1059	1534	1758	1045	2407	3378	2294	3083	866	1578	2413	2132	292	226	254	289	2536	2172	605	1052	1240	2449	2082	2098	1679	1500	PLEKHH3
1046	ENSG00000068305	3119	1672	5969	3225	5587	2765	1715	4220	4043	3858	5103	2152	3177	1977	4118	3419	1971	2581	4155	5323	3774	933	2208	2279	3678	2826	2496	3655	4270	MEF2A
1047	ENSG00000068308	1362	1413	2398	1200	1752	1408	1389	1928	2043	2656	2608	1301	1552	2229	2821	418	350	365	408	1811	1501	1078	1275	1823	2238	1742	2266	1596	1442	OTUD5
1048	ENSG00000068323	2353	1951	3228	1755	2264	1738	1339	2341	2812	2730	2608	926	2420	2616	2589	429	336	332	378	2637	2071	1799	2093	2096	2553	1853	2453	2233	2049	TFE3
1049	ENSG00000068354	600	482	931	525	778	446	430	582	684	730	1116	607	528	716	812	136	99	121	105	748	792	468	428	573	915	642	592	735	718	TBC1D25
1050	ENSG00000068366	1688	1444	3315	2162	1873	1702	727	2190	2017	2803	1798	872	2127	852	2301	1512	893	1415	1509	1585	2408	1991	1762	1331	2394	1461	3690	3751	3427	ACSL4
1051	ENSG00000068383	642	493	822	477	858	350	504	542	576	881	780	489	423	637	541	551	322	348	469	533	511	420	339	559	803	609	735	457	776	INPP5A
1052	ENSG00000068394	717	462	806	438	730	402	314	597	580	662	616	510	567	701	753	370	247	249	238	714	437	468	652	585	691	504	601	554	554	GPKOW
1053	ENSG00000068400	1152	1188	1462	769	1476	1364	1141	1824	1577	2133	1617	958	1045	1663	2504	679	418	439	583	1708	1316	429	964	1434	1469	1218	1947	1399	1212	GRIPAP1
1054	ENSG00000068438	1566	1064	2112	1022	1418	1008	746	1268	1506	1660	1392	1191	1281	1384	1706	420	269	316	321	1638	1280	1189	1235	1075	1699	1426	1119	1384	1159	FTSJ1
1055	ENSG00000068489	691	301	472	246	849	248	130	311	476	441	422	373	277	357	313	151	55	59	71	624	212	136	224	264	476	581	308	535	208	PRR11
1056	ENSG00000068615	121	146	217	123	524	195	125	388	287	377	558	82	180	369	233	142	66	144	135	184	359	35	1114	73	162	20	73	269	338	REEP1
1057	ENSG00000068650	1324	661	2609	1599	3987	988	922	1188	1506	2359	1897	1166	990	2005	2270	1113	685	708	935	2463	1638	520	689	1325	2106	1822	2500	2048	2396	ATP11A
1058	ENSG00000068654	2604	2230	4154	1944	4859	2169	1295	2726	4003	3732	2181	2047	1872	3020	3527	867	658	738	870	3764	1667	874	815	1557	2965	3329	4722	2704	2462	POLR1A
1059	ENSG00000068697	6141	6499	10530	5414	9808	5031	3771	6021	6275	10592	8077	4577	6968	8221	7350	3368	2236	2921	3043	5409	6592	8446	9401	7168	9888	5737	12011	6661	8676	LAPTM4A
1060	ENSG00000068724	1790	1037	2643	1348	1629	1336	875	1664	1972	2827	1759	1134	1387	1521	2244	480	459	358	404	1928	961	1005	1216	1566	1870	1594	3012	1640	1541	TTC7A
1061	ENSG00000068745	1825	3654	3132	1466	3409	2141	1823	3158	2501	2515	3976	1094	2102	2211	3243	1687	1256	1569	1415	3373	3273	1596	2594	2037	3550	1799	2854	2059	2103	IP6K2
1062	ENSG00000068781	0	0	0	0	0	0	0	0	0	5	1	1	0	0	0	1	0	0	3	1	0	1	0	1	0	0	0	1	1	STON1-GTF2A1L
1063	ENSG00000068784	497	376	558	272	558	325	203	555	512	481	241	431	370	365	492	802	323	540	659	620	262	224	311	314	403	408	312	385	335	SRBD1
1064	ENSG00000068793	6356	3421	7236	3631	5517	4114	2886	5499	6589	7199	6207	3173	4645	5022	6173	2826	1889	2182	2783	5621	3606	3631	3871	4052	5667	4312	7151	5319	4978	CYFIP1
1065	ENSG00000068796	914	826	1814	874	1389	821	632	1013	1241	1523	1028	981	686	1245	1369	1012	417	771	943	1068	932	478	1037	1295	1458	1587	1958	1404	1201	KIF2A
1066	ENSG00000068831	122	66	420	200	112	297	196	164	258	1081	317	517	101	203	838	38	51	45	60	92	75	100	354	561	138	47	124	254	162	RASGRP2
1067	ENSG00000068878	3081	3861	5486	2810	4688	2484	1976	3595	3858	3657	5056	2179	3053	4108	4184	2711	1537	2276	2803	4398	3508	1388	2408	3227	5819	4491	5706	3603	3434	PSME4
1068	ENSG00000068885	222	376	392	240	544	343	306	412	319	446	318	325	337	701	522	566	163	413	437	397	276	70	437	354	382	326	200	273	282	IFT80
1069	ENSG00000068903	2095	1328	2873	1482	2225	1682	1379	2130	2451	2185	3165	1079	1789	1819	2523	618	493	441	536	1947	1676	2008	2265	1682	2210	1566	2048	1952	1843	SIRT2
1070	ENSG00000068912	1197	1245	1879	1058	1572	1211	904	1251	1284	1662	1575	1094	1058	1426	1821	1168	517	914	1062	1122	1314	1567	1756	1542	1648	1170	2186	1278	1458	ERLEC1
1071	ENSG00000068971	1098	515	1207	565	778	733	678	1144	1190	1147	1565	675	1249	672	1369	209	144	124	163	1355	910	546	957	571	837	719	758	732	851	PPP2R5B
1072	ENSG00000068976	11	29	31	18	24	52	32	59	25	55	42	37	11	21	44	39	21	29	53	22	9	1	16	47	26	5	35	13	56	PYGM
1073	ENSG00000068985	0	0	0	0	0	0	0	0	0	0	1	0	1	0	0	0	0	1	0	0	0	0	0	0	0	0	0	0	0	PAGE1
1074	ENSG00000069011	2874	265	2644	1494	2307	790	714	1808	2952	1826	2836	4115	4721	1482	993	4	3	2	1	2758	2352	1151	3247	2348	1168	5939	2173	1389	1373	PITX1
1075	ENSG00000069018	3	0	0	0	0	1	1	0	2	0	0	0	0	0	0	1	0	0	0	1	0	0	0	0	0	0	0	0	0	TRPC7
1076	ENSG00000069020	5925	3339	5393	3057	5906	2431	1778	3201	3696	2951	3828	3283	3543	4316	4330	2244	1342	1582	2880	7238	4816	1794	2207	2546	6979	5026	6579	5154	5264	MAST4
1077	ENSG00000069122	901	378	1623	1044	932	602	357	549	495	981	1097	604	505	370	795	756	560	794	1264	665	391	287	293	436	563	272	453	684	1286	GPR116
1078	ENSG00000069188	612	934	514	326	675	270	191	566	536	197	830	210	668	145	675	45	22	25	47	870	889	154	51	141	1231	567	306	1538	1267	SDK2
1079	ENSG00000069206	0	0	2	0	0	0	0	1	1	0	0	0	0	1	0	0	2	4	3	1	0	0	0	0	0	6	0	0	1	ADAM7
1080	ENSG00000069248	1565	2096	2543	1332	3021	1361	1105	2057	2030	2625	1825	2159	1209	2373	2300	1887	1250	1487	1608	2057	1153	854	1364	1719	2058	1722	2061	1705	1745	NUP133
1081	ENSG00000069275	4466	8807	7511	4238	16335	4272	3311	5885	6688	7575	7851	4674	2851	5909	7213	6868	3091	5504	5953	5861	3911	2104	3209	4732	7170	5865	5840	6439	6174	NUCKS1
1082	ENSG00000069329	4711	3185	7319	3798	5232	3303	2555	4586	4825	5284	3187	2183	3781	3458	4339	3485	1869	2745	3216	4506	3457	3299	3554	3655	5075	5949	5139	4207	4029	VPS35
1083	ENSG00000069345	3292	1977	4427	2259	2834	2217	1602	2922	3282	3141	2042	1248	2513	2502	2747	2068	1194	1687	1825	3149	3092	2468	2551	3019	3634	4454	4030	2833	2693	DNAJA2
1084	ENSG00000069399	1696	440	1483	941	1178	1166	656	793	1760	2976	1375	848	1671	1089	1985	60	48	52	70	845	2925	1562	1519	1163	1447	1133	838	1707	2058	BCL3
1085	ENSG00000069424	361	741	1245	809	1110	839	771	759	754	2018	1025	926	302	1085	1883	223	144	159	168	804	418	256	1076	1808	1075	338	556	797	888	KCNAB2
1086	ENSG00000069431	333	330	1265	883	484	336	210	301	262	369	530	303	194	171	479	1442	1304	2269	2071	270	152	152	304	269	394	148	539	405	1991	ABCC9
1087	ENSG00000069482	48	87	229	39	125	821	589	3539	40	323	94	148	14	14	124	354	7	25	17	24	6	1094	1581	3348	6470	393	30457	42	814	GAL
1088	ENSG00000069493	80	177	552	289	199	286	274	245	219	723	427	588	153	442	763	482	353	450	624	118	153	57	581	783	257	144	139	338	260	CLEC2D
1089	ENSG00000069509	377	204	456	206	671	238	202	335	325	289	329	180	271	347	341	227	115	183	190	468	368	363	519	455	449	307	400	375	319	FUNDC1
1090	ENSG00000069535	193	219	1374	723	183	367	240	279	401	770	383	133	149	292	719	162	201	243	235	68	95	362	164	204	424	337	361	557	357	MAOB
1091	ENSG00000069667	11054	3143	14194	6967	8482	5181	6487	7563	7569	5237	7670	3786	2873	7406	9753	34243	13434	31059	22275	10840	15633	3717	4762	8179	12653	6004	11166	11255	12394	RORA
1092	ENSG00000069696	7	24	14	1	21	14	19	13	18	86	24	18	29	13	49	2	0	4	5	4	6	5	10	20	14	4	25	15	10	DRD4
1093	ENSG00000069702	213	731	2418	1329	2989	1049	673	1535	727	1495	1851	384	264	1182	1154	3843	5420	4733	4044	1415	965	176	473	1072	2187	431	4345	1081	2345	TGFBR3
1094	ENSG00000069712	24	79	79	49	115	42	32	52	24	69	36	66	43	105	70	203	106	186	249	58	27	9	62	97	140	48	39	65	59	KIAA1107
1095	ENSG00000069764	1	5	4	1	2	6	0	6	5	1	6	7	3	5	2	5	11	6	10	5	1	2	4	5	5	4	4	1	4	PLA2G10
1096	ENSG00000069812	2535	2289	1543	967	4567	800	820	977	1744	2501	3635	723	1492	8055	3661	301	168	292	276	1045	1194	544	687	2451	2068	855	1030	1283	1021	HES2
1097	ENSG00000069849	9546	5289	14706	7310	19590	7417	6751	14213	10807	9257	13757	9906	11412	12163	14852	4342	2529	3603	3345	13877	13625	8243	10041	5985	12173	18753	6794	12781	13934	ATP1B3
1098	ENSG00000069869	1611	1020	2446	1246	1815	1293	514	1056	1796	1941	995	892	1114	798	1815	1920	939	1380	2041	1582	1520	601	1200	906	1789	916	1628	1599	1377	NEDD4
1099	ENSG00000069943	283	256	544	274	354	244	183	305	268	451	256	163	216	264	409	411	192	363	443	329	310	183	449	386	398	234	206	302	259	PIGB
1100	ENSG00000069956	12964	3756	14393	6737	6461	5408	3459	8042	10233	9443	11292	4192	9713	5901	8428	3839	1794	2671	3243	13059	10501	6111	6639	5237	10348	8687	5703	9701	7888	MAPK6
1101	ENSG00000069966	620	373	1095	487	562	294	269	547	543	517	485	256	462	272	528	173	168	137	177	664	529	408	484	456	447	485	287	764	575	GNB5
1102	ENSG00000069974	799	529	1752	923	1124	1009	815	1220	1407	1606	1022	536	992	800	1172	645	200	409	472	853	848	815	1356	1720	1182	1018	2018	1264	1299	RAB27A
1103	ENSG00000069998	800	881	955	547	1723	649	523	842	1017	1289	990	1028	754	1067	1083	255	240	202	212	1155	815	890	887	994	1162	1111	1622	823	810	CECR5
1104	ENSG00000070010	2404	1288	2619	1313	2252	1480	959	2050	1802	2659	2328	1610	1721	2703	2465	837	586	714	799	2457	1973	1879	2448	2242	2605	2021	2867	2074	2031	UFD1L
1105	ENSG00000070018	728	1603	1507	843	1306	671	588	883	917	861	1053	625	504	872	1040	2487	1405	2169	2578	1152	913	236	566	904	1551	1470	1562	1118	1412	LRP6
1106	ENSG00000070019	291	50	305	138	99	103	73	91	211	142	169	16	158	61	170	175	151	124	152	409	203	48	110	73	165	98	89	165	240	GUCY2C
1107	ENSG00000070031	1	7	7	4	9	7	2	0	9	33	5	3	4	8	17	2	3	0	0	2	1	9	12	11	2	1	5	8	6	SCT
1108	ENSG00000070047	3312	1989	3281	1627	3183	1975	1378	2659	3359	3926	3702	1095	2056	3232	3415	523	607	561	603	2956	2047	673	588	1737	2421	2142	3025	2616	2348	PHRF1
1109	ENSG00000070061	1510	1099	1917	994	2915	1683	1067	1962	2271	2034	1771	1270	1608	1917	2541	1472	837	1192	1408	1862	1327	574	1007	1195	1910	1015	1462	1993	1374	IKBKAP
1110	ENSG00000070081	1044	776	1265	648	829	745	434	811	1024	1413	1359	483	615	548	1084	905	440	882	1120	620	659	962	748	1046	921	596	837	722	1120	NUCB2
1111	ENSG00000070087	921	1162	876	385	2958	310	744	386	357	483	1170	1003	1382	502	607	406	177	413	427	884	1736	839	396	929	1344	2729	864	734	911	PFN2
1112	ENSG00000070159	2551	1100	2615	1629	3661	1904	1800	2426	2842	2545	2919	1389	1593	2432	3335	3349	2093	2654	3313	2897	3273	849	2041	1741	2996	1672	2910	2897	3180	PTPN3
1113	ENSG00000070182	338	672	327	195	491	245	210	441	341	705	267	478	316	530	412	241	149	153	233	425	385	83	96	468	525	205	262	306	237	SPTB
1114	ENSG00000070190	1113	361	1537	859	991	914	753	859	1312	1683	1269	775	980	1337	1890	1231	596	743	995	2113	1485	734	1742	1783	947	852	1436	1009	819	DAPP1
1115	ENSG00000070193	0	6	38	18	13	13	9	12	5	7	4	4	2	1	3	31	13	44	53	4	1	7	6	5	8	0	15	23	42	FGF10
1116	ENSG00000070214	4153	3183	7530	3934	7619	3509	3044	5052	6185	4755	7718	2904	5583	4019	7401	5634	2915	4094	4748	5407	6580	3002	3449	3873	7021	6009	3919	7963	6438	SLC44A1
1117	ENSG00000070269	349	424	586	324	723	376	299	446	428	570	311	409	455	908	454	772	359	648	684	664	418	170	295	330	426	261	414	481	343	TMEM260
1118	ENSG00000070366	1708	1298	2933	1403	2083	1220	838	1568	2020	1804	2204	809	713	1367	1891	787	728	753	936	1864	1315	499	734	1161	1574	947	1953	1504	1482	SMG6
1119	ENSG00000070367	2709	1928	3403	1885	3539	1841	1376	2516	2883	2892	2622	1837	2235	2503	2707	2646	946	1914	2232	2791	2246	1665	1344	2136	3367	2310	3923	3361	3041	EXOC5
1120	ENSG00000070371	345	251	391	202	569	246	209	436	343	485	557	169	191	326	301	330	139	227	328	632	466	84	70	212	196	224	269	290	453	CLTCL1
1121	ENSG00000070388	42	61	181	90	129	225	220	177	349	150	227	29	113	174	309	51	26	16	31	180	265	89	114	146	284	124	161	220	104	FGF22
1122	ENSG00000070404	920	1376	667	375	293	289	200	258	329	1042	596	354	718	411	490	191	177	128	117	738	487	702	226	160	506	187	249	524	569	FSTL3
1123	ENSG00000070413	4155	3532	5384	2918	7921	3465	2673	4681	4972	5476	6311	2355	3061	5768	5095	1269	941	896	883	5164	2642	1637	1937	3046	5366	3950	6809	4862	4486	DGCR2
1124	ENSG00000070423	3018	823	2266	1232	1880	1140	854	1689	2086	3345	2728	1591	1592	2288	2349	174	149	119	138	2388	2707	1738	2101	2079	2524	1174	2442	1901	1812	RNF126
1125	ENSG00000070444	781	548	878	473	851	513	416	631	939	1014	1099	639	689	546	819	81	59	79	71	954	931	229	264	373	736	449	549	752	1002	MNT
1126	ENSG00000070476	1005	1163	1762	834	2657	1048	939	1511	1697	1855	1677	1002	1168	1776	2089	885	779	846	1081	1695	1109	377	894	1231	1425	1401	1944	1223	1346	ZXDC
1127	ENSG00000070495	498	386	687	337	511	410	256	527	590	754	510	423	693	372	568	211	198	208	214	662	493	468	493	464	469	560	721	549	450	JMJD6
1128	ENSG00000070501	431	496	678	345	1072	633	351	675	720	631	469	668	532	628	768	421	197	360	461	550	470	721	689	467	681	863	839	539	457	POLB
1129	ENSG00000070526	352	104	94	55	459	218	74	351	825	294	594	47	454	90	192	43	13	17	29	275	530	329	1769	173	78	283	126	276	250	ST6GALNAC1
1130	ENSG00000070540	640	662	1475	787	605	459	328	605	789	793	1112	487	667	855	968	519	549	412	586	469	811	680	864	646	772	844	409	892	830	WIPI1
1131	ENSG00000070601	419	282	685	301	350	509	571	623	1345	296	1731	190	327	544	1003	677	199	234	221	1012	1254	375	183	310	619	621	476	565	828	FRMPD1
1132	ENSG00000070610	2812	1200	2182	989	1590	3047	1997	3319	4802	3366	4160	1124	1928	2691	4091	1272	780	949	950	4083	3000	1021	1131	1743	2263	2947	4551	1736	1795	GBA2
1133	ENSG00000070614	10967	6639	10051	6105	9669	5907	4240	6233	11177	9091	8547	2809	4148	9441	9524	1756	1274	1547	1348	8117	5281	3503	2818	3730	9937	7404	10874	8961	8819	NDST1
1134	ENSG00000070669	463	727	890	434	1956	481	353	652	605	1006	467	489	413	1149	1147	415	227	354	342	761	651	373	759	532	640	473	497	674	549	ASNS
1135	ENSG00000070718	382	645	801	430	849	568	545	646	791	1045	591	579	543	1115	964	519	398	560	566	822	435	203	716	526	593	848	696	703	449	AP3M2
1136	ENSG00000070729	375	27	200	148	31	147	29	100	368	81	78	24	311	49	308	9	2	0	7	172	376	557	77	62	246	122	37	425	50	CNGB1
1137	ENSG00000070731	898	1606	699	386	1564	930	1028	1582	1312	1121	1778	1241	1640	1608	1931	634	348	359	472	1585	1975	1089	1196	1067	2801	1657	2227	1611	1485	ST6GALNAC2
1138	ENSG00000070748	1	21	19	12	15	6	2	5	6	13	4	9	4	1	0	0	0	1	3	2	2	5	6	3	9	3	0	10	1	CHAT
1139	ENSG00000070756	41610	27099	43833	22925	62400	31029	21057	37201	43815	66733	46776	22156	36751	34753	42597	7251	4211	5587	6202	29714	27262	40377	28529	26851	45410	52771	66577	33161	28956	PABPC1
1140	ENSG00000070759	362	342	667	333	1198	298	305	502	479	431	521	398	288	640	664	444	241	269	362	478	444	231	646	632	748	285	438	464	367	TESK2
1141	ENSG00000070761	521	359	629	277	611	340	262	524	468	613	387	446	326	360	451	246	180	196	289	576	403	450	607	484	540	393	566	501	457	C16orf80
1142	ENSG00000070770	6318	3935	9904	4515	6628	5558	4393	6207	12212	5145	7567	2376	2663	4532	8140	4061	2063	2726	2427	8164	10975	4401	3050	5244	8428	5413	7838	7077	6860	CSNK2A2
1143	ENSG00000070778	1163	970	1844	1197	1800	947	1012	1255	1092	1243	1617	675	902	1187	1674	2146	856	1799	1551	2170	1346	493	546	844	1433	660	704	1367	1712	PTPN21
1144	ENSG00000070785	870	498	995	483	1180	546	316	846	802	1018	456	565	503	708	874	576	273	446	418	761	540	718	762	576	908	618	1449	685	610	EIF2B3
1145	ENSG00000070808	10	50	17	13	26	11	24	22	17	23	16	13	16	54	12	41	9	9	11	22	22	3	12	16	37	18	19	9	15	CAMK2A
1146	ENSG00000070814	2008	1613	1761	926	2622	1487	996	1934	3078	3223	2033	1666	1453	2464	2305	451	357	444	412	2532	802	630	611	849	2018	2338	1766	1779	1245	TCOF1
1147	ENSG00000070831	10607	7001	14759	7206	10692	5880	4414	7787	8773	12513	10813	6004	8724	6920	11133	6944	3467	5105	5653	8617	8146	11076	9851	10217	11840	9119	11847	9840	8861	CDC42
1148	ENSG00000070882	1822	2368	2916	1368	2229	1602	1302	1702	2165	2967	2239	1669	1800	3020	4017	1442	919	970	1283	2667	1924	759	1654	1482	1707	2307	1798	1634	1644	OSBPL3
1149	ENSG00000070886	4	16	1	1	89	25	5	26	28	15	100	37	8	27	26	0	1	2	0	17	9	8	18	49	151	430	9	3	30	EPHA8
1150	ENSG00000070915	3	0	38	17	7	29	11	5	18	74	13	8	5	20	49	3	3	0	1	3	2	14	18	30	8	3	11	40	1	SLC12A3
1151	ENSG00000070950	558	629	1047	567	936	472	396	892	749	979	782	443	435	834	766	483	183	369	487	951	474	309	618	441	795	543	645	659	545	RAD18
1152	ENSG00000070961	2184	1972	4347	2346	3398	1672	1264	1788	2452	3171	2795	1301	1535	1773	2885	4219	2291	3179	3510	3055	2749	1368	1457	2658	2878	1945	3073	2988	2940	ATP2B1
1153	ENSG00000070985	0	0	1	0	5	3	2	3	1	2	3	6	0	2	4	2	1	0	3	1	0	0	3	5	0	1	3	1	2	TRPM5
1154	ENSG00000071051	1910	1067	2184	1023	1582	679	642	1165	1199	1313	2152	972	935	649	1114	338	207	241	253	1995	1703	1347	1385	2349	2290	2123	2144	1827	1733	NCK2
1155	ENSG00000071054	8341	4847	7029	3504	4849	3927	2953	5568	9646	8288	7510	2332	4388	3017	6728	2092	1615	1844	2241	5602	3760	5543	2368	3985	6184	8675	6225	6033	6166	MAP4K4
1156	ENSG00000071073	295	281	834	418	756	407	267	285	334	1127	528	572	241	637	880	834	473	750	835	183	185	215	614	1173	666	239	1689	614	605	MGAT4A
1157	ENSG00000071082	12748	8979	11356	6589	14516	7786	6591	8914	7906	14570	9501	8935	6605	11304	11130	10835	6121	7619	8114	8868	17151	33157	29564	19667	17440	11965	28225	12379	14196	RPL31
1158	ENSG00000071127	15568	8769	15395	7338	9234	6109	3664	8577	10371	13437	14776	7423	11238	9655	12673	3167	2186	2345	2547	12297	8940	11703	8407	9509	14821	9499	12985	10252	10362	WDR1
1159	ENSG00000071189	1378	1253	2079	1125	2325	1189	958	1651	1619	1866	1440	1128	1246	2034	1754	3965	1703	2752	3100	1944	1516	659	1391	1761	2274	1546	3327	1645	1650	SNX13
1160	ENSG00000071203	0	0	0	0	0	0	0	0	0	0	0	0	0	0	0	0	0	0	1	0	0	0	0	0	0	0	0	0	0	MS4A12
1161	ENSG00000071205	825	704	717	425	1046	529	387	682	545	773	890	386	377	670	652	1663	943	1421	1619	795	556	575	631	723	1000	461	1051	748	706	ARHGAP10
1162	ENSG00000071242	1550	1153	1452	897	1770	1202	893	1474	1889	1474	1947	845	905	1197	1995	547	584	489	614	1044	973	647	933	1563	1626	1223	1915	1141	2009	RPS6KA2
1163	ENSG00000071243	328	294	584	281	489	277	236	454	402	498	330	481	298	516	481	421	201	395	374	437	379	260	550	518	416	357	391	344	335	ING3
1164	ENSG00000071246	347	315	1077	504	500	478	316	476	693	1018	463	331	229	373	743	125	130	89	150	277	74	169	276	481	396	209	515	535	545	VASH1
1165	ENSG00000071282	211	245	699	370	300	119	121	104	114	373	364	301	173	128	349	272	228	283	293	136	234	485	243	193	291	94	183	325	749	LMCD1
1166	ENSG00000071462	1520	1304	2305	1245	2804	1262	1113	1660	1769	3020	1520	2976	1499	2382	1960	416	301	371	330	2148	1423	1513	1890	1732	2118	1996	2752	1678	1586	WBSCR22
1167	ENSG00000071537	3322	3405	6934	3790	5532	3523	2658	3426	4364	4412	4955	2273	2382	4272	6292	4062	2085	3120	3545	4566	3793	1935	1856	3707	4682	3307	5681	5041	4798	SEL1L
1168	ENSG00000071539	558	282	428	224	607	271	216	322	560	463	392	513	338	511	300	132	31	64	57	514	306	229	368	299	354	765	368	408	206	TRIP13
1169	ENSG00000071553	2916	2365	5395	2826	3876	3128	2390	3423	4409	4546	4650	1956	2970	3886	4639	835	706	649	711	3107	2351	2689	1910	2818	3164	2139	4323	3383	2850	ATP6AP1
1170	ENSG00000071564	2327	3392	2651	1361	2806	1773	1415	2430	3299	3639	2711	2249	1688	2262	2548	276	192	206	217	2801	1563	1324	1307	1740	2462	2062	2853	2119	1711	TCF3
1171	ENSG00000071575	1325	1075	2447	1403	1623	1469	1066	2139	1204	2359	2099	1373	1115	1338	2395	485	327	471	499	1870	1407	796	1795	1728	2186	1978	1111	1445	1873	TRIB2
1172	ENSG00000071626	4967	3379	5100	2577	5813	3260	2583	4587	6901	7683	5679	4254	3655	5294	5577	809	610	649	781	5411	3430	2897	3068	3830	4478	3384	4770	3695	3586	DAZAP1
1173	ENSG00000071655	1572	1119	1854	912	2203	1054	770	1446	1700	2267	1790	924	770	1842	1632	206	165	126	129	1594	1272	791	845	1272	1434	781	1860	1325	1250	MBD3
1174	ENSG00000071677	0	0	0	0	0	0	0	0	0	0	0	0	0	0	0	0	0	0	0	0	0	0	0	0	0	0	0	0	0	PRLH
1175	ENSG00000071794	364	1175	909	482	3012	696	516	734	538	1100	528	926	453	1350	1606	1096	375	806	983	933	244	178	489	589	891	840	607	608	595	HLTF
1176	ENSG00000071859	1297	551	1255	716	1325	791	583	910	1007	1668	1253	778	944	938	1392	377	265	270	310	1191	701	777	834	943	894	666	1116	1066	937	FAM50A
1177	ENSG00000071889	1381	762	1469	710	1743	788	679	1083	1299	1428	1499	1093	1079	1678	1521	208	144	169	178	1327	1058	934	1076	1237	1385	976	1903	1031	780	FAM3A
1178	ENSG00000071894	1531	2096	1889	971	4007	2495	1939	3290	3331	5186	4096	3916	1817	3917	4537	357	406	427	452	3219	2384	505	928	1377	2403	2421	3258	1784	1632	CPSF1
1179	ENSG00000071909	118	470	28	20	26	11	10	23	9	24	114	7	22	2	15	113	27	47	45	234	120	11	24	173	50	9	53	61	50	MYO3B
1180	ENSG00000071967	790	4570	6510	4317	5480	2667	2272	4332	2083	3355	5211	2189	1519	1809	3289	10789	8433	9341	9952	3360	1930	1430	4357	2555	3575	1130	2451	3878	9563	CYBRD1
1181	ENSG00000071991	20	226	23	16	100	53	66	41	40	48	28	49	8	42	72	439	264	318	277	68	58	19	11	253	78	48	97	23	82	CDH19
1182	ENSG00000071994	1716	2041	1892	959	1323	1383	934	1693	1980	2484	1294	1819	1571	2778	1967	1426	585	1097	1199	1799	1355	1916	2023	1569	1945	1449	1991	1457	1401	PDCD2
1183	ENSG00000072041	401	141	592	371	243	336	106	138	263	123	518	211	1173	156	366	385	135	210	134	308	988	221	79	149	155	1183	220	766	210	SLC6A15
1184	ENSG00000072042	1358	1611	2276	1090	1806	1992	1060	3661	2251	1796	2358	902	1491	2073	2493	1536	542	955	854	2094	1592	1367	1193	3466	4078	1752	12259	1736	1593	RDH11
1185	ENSG00000072062	2238	1804	3367	1718	3683	1619	1284	2268	2908	3546	2553	1614	1531	1825	2643	134	121	147	153	2196	1268	1513	1401	1765	2336	1877	2530	1963	2149	PRKACA
1186	ENSG00000072071	432	913	859	517	3537	835	662	1178	1633	1706	749	852	392	791	1436	189	168	156	194	1698	642	167	276	715	988	1201	1156	1090	862	LPHN1
1187	ENSG00000072080	1	0	1	0	0	0	0	0	0	0	0	0	0	0	0	4	0	3	1	1	0	0	0	2	1	0	1	2	0	SPP2
1188	ENSG00000072110	13942	8495	7755	4799	4877	6364	3306	6362	10276	16896	6860	2967	7572	3059	9590	1331	890	830	1171	4949	4920	11867	2404	3557	9085	7030	15135	7405	7514	ACTN1
1189	ENSG00000072121	1453	1298	1870	1060	2460	1116	890	1369	1717	1668	1299	1009	1258	1949	2394	1523	1193	1385	1809	2186	1232	474	678	1271	1791	1321	1747	1831	1417	ZFYVE26
1190	ENSG00000072133	62	198	125	66	93	61	88	142	42	47	135	60	30	125	102	301	137	195	204	73	134	23	51	130	251	71	172	95	106	RPS6KA6
1191	ENSG00000072134	1322	1120	1856	918	3180	1046	805	1544	1752	1531	2316	1079	915	1400	1612	1295	1049	1157	1459	1776	1182	493	966	1083	1674	1014	1352	1284	1322	EPN2
1192	ENSG00000072135	612	601	1387	727	1612	1000	690	1082	1078	2461	1137	1282	647	1868	1580	338	323	292	326	733	412	571	1115	1430	983	371	964	875	805	PTPN18
1193	ENSG00000072163	298	263	366	199	301	287	262	281	287	408	374	232	140	260	545	190	188	208	155	315	194	149	190	339	282	92	279	211	385	LIMS2
1194	ENSG00000072182	2	20	2	1	5	1	6	6	6	7	5	4	5	5	7	3	4	4	6	5	4	0	0	6	6	3	4	6	7	ASIC4
1195	ENSG00000072195	221	1255	189	99	396	170	100	465	134	215	835	223	304	329	288	137	85	78	86	668	197	34	270	118	190	347	106	274	275	SPEG
1196	ENSG00000072201	580	286	513	394	658	313	363	300	772	494	750	110	360	626	683	963	696	709	765	855	979	448	273	260	656	457	539	644	570	LNX1
1197	ENSG00000072210	3081	5933	6504	4306	12318	4773	5158	7319	5118	4704	7123	3465	2411	4986	6594	10502	6016	8841	7318	6125	4875	3390	5600	5199	9670	3951	9347	5087	5623	ALDH3A2
1198	ENSG00000072274	2013	4406	4312	2477	9928	2092	1959	3995	3649	5363	3347	1980	2684	7242	7229	3195	1322	1696	2249	3349	2839	1754	2352	2997	6211	3724	9839	3363	2512	TFRC
1199	ENSG00000072310	2401	3191	4460	2359	8801	4978	2795	6346	6071	6892	5991	3938	2888	6876	6010	572	433	625	531	4338	2730	1133	2974	4193	8413	2625	21374	4572	3197	SREBF1
1200	ENSG00000072315	1	0	0	1	0	3	1	1	2	0	1	1	1	0	0	59	35	49	50	0	0	0	2	0	0	0	3	0	1	TRPC5
1201	ENSG00000072364	5198	5751	8238	4216	5629	2833	2474	4037	5523	3408	4741	2401	2646	3955	4960	5484	2943	4694	6334	6481	5058	1980	3064	3596	8761	6614	9739	6521	7351	AFF4
1202	ENSG00000072401	546	693	848	500	651	496	368	498	716	960	589	481	688	707	613	314	60	267	271	529	619	823	552	759	885	760	688	615	640	UBE2D1
1203	ENSG00000072415	1588	918	1799	989	2058	1052	775	1483	1445	1461	1169	862	1086	1527	1709	1741	747	1558	1643	1976	1131	724	778	1192	1336	853	1574	1634	1226	MPP5
1204	ENSG00000072422	439	227	592	348	386	187	221	171	248	399	466	246	136	201	303	268	251	329	367	423	330	160	119	459	404	289	259	243	475	RHOBTB1
1205	ENSG00000072444	1	1	2	0	0	1	0	0	3	0	0	0	1	0	0	1	0	0	0	0	2	0	1	0	0	0	1	0	0	ASAH2C
1206	ENSG00000072501	4052	3642	5637	2559	12075	2780	1947	3680	4508	4815	4080	3108	2240	4415	5635	2309	1355	1817	1769	7175	1835	1081	1313	2242	3411	3307	3915	5563	3425	SMC1A
1207	ENSG00000072506	2285	1027	2324	1144	3434	1327	1049	1925	2085	2119	1255	1112	1497	2209	1924	654	475	516	513	2385	1874	2429	2885	1760	2182	1812	4097	2042	1868	HSD17B10
1208	ENSG00000072518	2636	1800	3301	1747	3652	2210	1699	2974	3942	3927	3353	1769	3189	4253	4027	518	350	381	582	2999	2039	1273	1329	2147	3047	2372	3589	2547	2080	MARK2
1209	ENSG00000072571	322	213	217	128	698	252	126	373	435	368	180	442	308	480	305	378	57	121	125	445	115	114	478	149	369	275	351	318	95	HMMR
1210	ENSG00000072609	1266	677	1180	603	1000	801	625	858	1342	1826	1616	859	797	1582	1514	397	278	287	446	1279	908	506	841	1076	1194	899	746	886	792	CHFR
1211	ENSG00000072657	9	10	15	5	20	23	20	41	10	12	7	13	6	5	17	79	18	48	60	14	9	16	16	43	149	33	381	18	28	TRHDE
1212	ENSG00000072682	1016	1097	1019	588	1061	443	482	749	734	968	856	406	771	709	1123	672	404	432	581	713	407	780	325	290	978	763	592	1432	1148	P4HA2
1213	ENSG00000072694	134	159	623	397	250	335	179	216	315	766	378	394	171	275	921	265	451	227	322	175	49	369	466	484	185	60	180	376	292	FCGR2B
1214	ENSG00000072736	738	894	1657	869	1193	682	515	814	1025	979	749	531	515	731	1089	748	596	620	864	981	632	394	624	862	1266	594	937	837	960	NFATC3
1215	ENSG00000072756	312	389	564	358	480	556	483	596	788	602	385	277	430	625	619	703	337	618	683	652	502	337	493	348	555	359	785	538	528	TRNT1
1216	ENSG00000072778	12365	3911	7614	3884	6142	10857	6515	16517	16669	10089	13618	4437	6352	6946	11056	3525	2203	2071	2482	10685	8941	6209	7404	9923	8605	5652	20534	6324	5988	ACADVL
1217	ENSG00000072786	1941	805	2767	1493	1495	1833	1438	1603	2958	3070	3396	1076	1104	1858	3389	907	619	514	654	1782	1859	1218	1183	2125	2611	2019	1952	2026	2286	STK10
1218	ENSG00000072803	1907	1587	2388	1324	2389	1880	1263	1937	2720	2584	2013	1031	1479	2041	2699	1555	929	1215	1502	1935	1368	1412	1477	1574	3185	2372	3144	2224	2151	FBXW11
1219	ENSG00000072818	165	127	1162	503	197	698	523	346	540	2172	867	785	249	439	1728	202	201	175	286	258	177	244	765	1513	300	121	259	578	329	ACAP1
1220	ENSG00000072832	148	293	271	176	333	178	192	249	239	189	177	192	220	104	435	152	95	187	223	495	147	78	94	155	251	192	370	320	324	CRMP1
1221	ENSG00000072840	816	927	1302	773	1321	508	501	812	617	513	791	417	372	383	1195	641	510	505	658	1293	567	245	353	623	1054	647	1108	905	1294	EVC
1222	ENSG00000072849	936	839	1368	732	1444	846	670	1143	1157	1205	1229	909	673	1027	1184	769	413	563	715	1202	1034	1130	1282	1107	1127	680	1458	929	980	DERL2
1223	ENSG00000072858	35	48	171	66	104	173	81	73	168	389	127	165	69	68	256	66	95	57	125	18	21	81	228	346	80	120	51	160	87	SIDT1
1224	ENSG00000072864	1139	852	1489	748	1858	983	576	1418	1374	1376	1794	719	1358	1028	1307	546	427	489	590	1745	896	936	1012	920	1549	1168	1004	1159	1198	NDE1
1225	ENSG00000072952	314	177	888	499	425	390	251	278	339	638	679	436	339	312	620	436	270	350	630	342	251	93	131	172	303	121	282	313	996	MRVI1
1226	ENSG00000072954	47	50	65	26	115	81	43	127	59	117	169	60	54	78	69	40	35	29	27	86	34	28	74	109	155	176	409	58	75	TMEM38A
1227	ENSG00000072958	1578	902	2192	1153	1737	883	683	1171	1506	2396	1538	912	821	1051	1408	303	238	276	224	1285	739	1102	964	1318	1497	1204	1621	1314	1267	AP1M1
1228	ENSG00000073008	994	589	950	483	812	340	408	538	818	1011	696	460	776	575	904	243	146	219	195	944	732	544	246	384	658	861	749	694	573	PVR
1229	ENSG00000073009	532	322	730	361	542	354	298	520	606	847	621	365	488	483	705	109	101	89	103	680	457	307	426	494	455	347	476	469	367	IKBKG
1230	ENSG00000073050	433	425	482	241	641	262	265	396	389	435	332	509	216	329	492	149	158	121	131	527	308	218	367	397	488	309	408	373	342	XRCC1
1231	ENSG00000073060	594	826	1084	672	1530	993	687	1168	906	1170	983	697	588	773	1414	481	382	380	316	825	589	626	883	1353	2296	1147	6309	853	1009	SCARB1
1232	ENSG00000073067	16	1069	10	11	138	8	58	84	9	24	54	38	16	886	40	43	23	11	14	73	13	3	5	15	25	6	5	10	43	CYP2W1
1233	ENSG00000073111	1730	1651	1847	791	6450	1050	663	1723	1984	3197	2052	2492	1341	2193	3060	436	146	231	248	2583	647	471	662	975	1561	2753	1137	1464	939	MCM2
1234	ENSG00000073146	12	83	15	2	198	105	31	8	18	42	8	52	46	8	37	10	12	21	21	3	9	4	15	67	10	3	9	15	15	MOV10L1
1235	ENSG00000073150	102	64	9	12	309	40	24	101	92	129	42	123	31	48	53	6	1	1	6	166	161	34	33	101	46	71	22	98	48	PANX2
1236	ENSG00000073169	649	593	779	452	1066	703	557	993	1130	1626	1243	629	623	1065	1250	185	151	134	191	1064	839	322	544	865	759	720	948	824	663	SELO
1237	ENSG00000073282	17045	18173	28174	14397	33055	13728	7321	20426	18804	16519	19956	7048	23232	13336	21536	6257	3568	4963	6258	24362	18559	5775	26873	7187	19914	27319	13107	19588	18650	TP63
1238	ENSG00000073331	646	647	997	635	1405	732	521	670	783	1554	970	938	529	813	1098	1438	893	971	1781	994	774	270	1192	1081	1317	682	795	931	958	ALPK1
1239	ENSG00000073350	3039	1441	2664	1225	1783	1726	1205	2044	3030	2872	2898	1722	2153	2311	2422	470	426	400	365	3425	2001	998	1289	1262	2218	1404	3807	2082	1867	LLGL2
1240	ENSG00000073417	1134	832	1834	964	1753	1156	909	1682	1907	1716	2277	1346	1266	1538	2498	974	632	888	1292	1447	1442	838	1163	1194	2206	1088	1524	1231	1205	PDE8A
1241	ENSG00000073464	15	34	81	41	444	144	157	104	111	327	219	67	80	281	310	89	202	98	311	64	87	41	94	307	47	16	156	84	222	CLCN4
1242	ENSG00000073536	462	494	619	379	710	384	300	493	672	807	445	447	377	380	514	211	136	187	182	623	386	278	321	389	488	566	804	484	376	NLE1
1243	ENSG00000073578	1938	1297	2198	1215	3431	1427	1110	2252	1616	1702	1603	954	1308	2394	2515	1077	977	979	982	2658	1675	1784	1805	2193	2621	1623	5356	2027	1999	SDHA
1244	ENSG00000073584	1325	2527	2186	1170	1710	1111	819	1309	1362	1756	1989	919	1034	1808	1575	1686	668	1327	1497	1421	1552	984	1424	1321	2127	1652	1693	1505	1621	SMARCE1
1245	ENSG00000073598	8	9	16	6	10	6	4	12	5	6	5	3	1	3	6	2	2	0	2	6	3	3	2	9	6	2	10	4	7	FNDC8
1246	ENSG00000073605	184	440	342	170	313	461	559	697	477	499	440	338	319	348	502	368	295	326	328	441	191	17	408	473	260	328	285	229	243	GSDMB
1247	ENSG00000073614	2011	2691	3655	1918	3491	1433	1243	2159	2515	2599	2495	1260	1696	2350	2905	5768	3731	5016	5416	2692	1639	773	1254	2057	2592	2878	3206	3001	2732	KDM5A
1248	ENSG00000073670	78	150	104	41	88	88	40	156	209	108	231	141	99	187	138	36	20	22	31	111	70	50	28	120	114	161	57	52	62	ADAM11
1249	ENSG00000073711	3098	1246	5430	2823	3708	1769	1583	2596	3017	2000	2696	934	1584	1736	3300	3872	1824	2825	3640	2970	2353	904	2328	1613	3525	2660	1641	3297	2689	PPP2R3A
1250	ENSG00000073712	419	773	1141	646	466	405	286	366	370	882	629	483	303	315	495	1174	671	1050	1327	307	294	306	284	335	499	228	461	485	1352	FERMT2
1251	ENSG00000073734	12	502	5	1	13	5	5	12	10	21	7	5	17	13	15	94	36	63	95	14	21	6	6	9	71	19	117	8	20	ABCB11
1252	ENSG00000073737	716	500	386	113	233	678	143	556	1451	933	490	147	1576	529	440	267	137	168	171	392	604	968	1224	582	647	1325	3340	231	275	DHRS9
1253	ENSG00000073754	0	2	2	0	5	2	2	2	2	3	0	2	1	0	2	2	1	13	10	1	1	2	1	2	0	3	0	1	0	CD5L
1254	ENSG00000073756	1727	596	1546	949	162	122	155	499	377	374	251	36	440	373	623	147	77	93	95	1947	383	346	800	151	122	111	148	1096	996	PTGS2
1255	ENSG00000073792	558	2446	274	146	317	69	95	44	78	271	112	123	243	81	243	230	202	248	169	85	45	192	144	196	100	743	77	194	252	IGF2BP2
1256	ENSG00000073803	883	557	1259	610	1540	604	454	731	902	960	988	689	804	793	1378	845	456	750	899	1053	880	1242	1240	929	1220	1170	771	849	722	MAP3K13
1257	ENSG00000073849	258	305	1471	778	1108	1145	767	707	564	1512	966	819	540	561	3170	432	457	492	629	302	117	928	1571	1677	643	331	1209	1234	1031	ST6GAL1
1258	ENSG00000073861	5	3	48	28	16	30	31	7	15	167	45	84	13	25	94	5	1	1	2	6	2	2	58	124	14	5	8	26	25	TBX21
1259	ENSG00000073905	0	3	1	0	1	1	1	0	3	2	2	2	0	2	1	0	0	0	1	1	1	4	3	1	0	1	2	1	0	VDAC1P1
1260	ENSG00000073910	1108	810	963	648	1291	801	548	694	1050	1025	428	601	459	981	1197	2336	1244	1599	2895	510	328	548	1250	826	1702	558	3062	705	1208	FRY
1261	ENSG00000073921	6823	7157	12762	6690	6364	5169	3841	6959	7870	8724	7222	5642	9700	7330	10100	6094	2602	4893	5870	6774	7128	5569	6160	5709	9743	7514	8878	6354	8090	PICALM
1262	ENSG00000073969	1581	1030	2255	1198	1729	1382	861	1579	2217	2012	2081	1062	1417	1155	1902	951	473	648	730	1657	1167	1050	1311	1447	1651	1392	2315	1519	1558	NSF
1263	ENSG00000074047	67	4860	99	56	286	114	102	179	157	85	70	58	37	30	122	91	42	58	78	96	103	33	43	74	151	95	525	127	204	GLI2
1264	ENSG00000074054	2713	3156	3587	1845	2851	1572	1243	2184	2639	2212	3333	1378	1728	2520	3285	2936	1772	2146	2993	3067	2416	955	1284	1926	3168	2559	2765	2534	2587	CLASP1
1265	ENSG00000074071	2115	754	1865	968	1724	819	668	1352	1574	2083	1736	1499	1229	2170	1460	345	228	248	236	1837	1283	1802	1975	1546	1552	1149	2347	1220	1203	MRPS34
1266	ENSG00000074181	8953	8557	13823	7167	18842	8102	9294	12163	17288	16166	13482	8182	6030	19102	16649	1305	997	1064	1183	8713	4656	1854	2120	5964	12494	7260	11464	7134	10176	NOTCH3
1267	ENSG00000074201	1386	1367	1872	1025	1727	976	761	1428	1479	1853	1518	1497	1739	1649	1607	1480	783	1126	1388	1795	1478	1690	2343	1705	1816	1450	1924	1584	1531	CLNS1A
1268	ENSG00000074211	7450	1513	6086	3684	5885	2994	2133	4618	6026	7328	4839	1675	4335	4426	6928	681	464	591	610	4792	3941	5046	4039	3689	5815	4142	2362	6215	3412	PPP2R2C
1269	ENSG00000074219	325	597	448	237	482	226	157	274	280	442	449	244	321	338	465	111	69	91	79	290	389	384	138	262	347	446	157	368	491	TEAD2
1270	ENSG00000074266	537	531	935	473	727	606	425	764	778	1020	545	851	683	791	913	855	392	658	625	750	522	297	762	800	551	541	695	579	483	EED
1271	ENSG00000074276	23	20	22	12	15	16	19	9	12	39	11	25	10	12	37	23	19	20	26	33	31	3	13	31	17	15	25	21	34	CDHR2
1272	ENSG00000074317	71	9	25	12	13	7	12	7	10	42	6	11	6	4	5	2	0	0	0	16	16	27	11	8	10	50	6	8	5	SNCB
1273	ENSG00000074319	2032	1400	2539	1183	1851	1113	728	1441	1388	1937	1868	855	2170	2119	2107	1011	590	768	838	1938	1896	2024	1712	1836	2336	1474	2548	1791	1650	TSG101
1274	ENSG00000074356	1504	1331	2036	950	2134	1093	776	1268	1582	1329	1442	1189	713	1259	1784	1224	701	971	1231	1850	1600	427	902	1263	1638	1060	1694	1489	1479	C17orf85
1275	ENSG00000074370	158	137	1766	776	898	995	681	452	666	2251	1262	1158	388	553	2761	240	366	202	180	283	79	269	732	1769	499	193	337	861	538	ATP2A3
1276	ENSG00000074410	8612	3139	12033	6812	11992	6416	7184	9921	9032	11616	10687	3531	7613	4205	12462	3422	2870	2453	3841	9900	6430	4932	3661	11416	11829	5267	9131	12439	7049	CA12
1277	ENSG00000074416	3304	1420	3480	1896	2910	1850	1254	1822	2962	4315	3890	1857	3857	2466	3919	611	618	667	655	2820	2138	1960	1689	2779	2987	2192	4292	3186	3459	MGLL
1278	ENSG00000074527	142	771	301	263	407	209	153	239	87	291	563	129	139	123	246	593	494	584	725	145	182	101	324	240	985	203	455	331	486	NTN4
1279	ENSG00000074582	806	480	474	234	745	761	523	1222	1088	1169	599	551	628	1237	1222	304	198	268	220	1324	614	418	788	534	589	488	706	598	415	BCS1L
1280	ENSG00000074590	404	4628	2060	813	2134	1021	1430	4244	1322	602	2213	1176	465	948	1210	1746	1074	855	1610	1852	430	350	908	2808	998	654	813	766	1753	NUAK1
1281	ENSG00000074603	1452	1780	2859	1436	2575	1224	1164	1788	1789	2154	2101	1167	1076	2139	2423	2221	1165	2041	2349	2080	1516	667	1372	1807	2502	1747	2432	2150	2153	DPP8
1282	ENSG00000074621	240	427	539	289	651	306	278	385	442	508	382	242	216	547	477	505	411	458	602	418	265	89	311	427	453	282	409	398	391	SLC24A1
1283	ENSG00000074657	2911	4318	4115	1960	4134	2307	1951	3087	3609	2743	6364	2093	2412	2225	5409	1477	1081	1455	1685	3244	3402	1013	2445	1865	3693	3442	1295	1933	2657	ZNF532
1284	ENSG00000074660	276	92	497	258	239	592	492	491	473	691	377	165	154	250	462	85	87	67	80	231	94	78	335	364	201	107	309	290	302	SCARF1
1285	ENSG00000074695	5481	4468	6864	4015	6394	3760	2377	4501	5128	6280	7064	2994	2856	4303	5272	3243	1262	2380	2849	3883	3591	2767	2538	3657	5166	3238	6502	4615	4895	LMAN1
1286	ENSG00000074696	1357	1251	2002	1082	3860	1151	1022	1600	1666	2763	1887	1258	1021	2311	2671	1586	932	1229	1414	1917	1321	855	1305	1475	1793	1229	2242	2318	1518	PTPLAD1
1287	ENSG00000074706	37	73	292	130	85	128	97	103	89	347	153	319	101	151	321	78	84	75	142	47	129	39	223	576	140	42	126	198	110	IPCEF1
1288	ENSG00000074755	3344	2227	5433	2550	5126	1985	1444	2496	3696	2966	2839	2029	1264	2450	3685	2360	1955	2167	2890	4579	2580	704	1485	2512	3856	2125	3984	3826	3587	ZZEF1
1289	ENSG00000074771	0	0	0	0	0	0	0	0	0	1	0	0	0	1	0	1	0	0	1	0	0	0	0	0	0	0	0	0	1	NOX3
1290	ENSG00000074800	57840	18920	59274	27441	46050	27997	14653	38907	52717	80052	38170	32424	39510	37850	53943	7779	5120	5955	6606	47709	24805	51772	30917	24716	37591	36319	44437	33619	24246	ENO1
1291	ENSG00000074803	4	5	3	2	4	6	3	1	4	11	7	14	2	4	2	66	27	30	37	1	1	0	2	0	5	3	2	3	11	SLC12A1
1292	ENSG00000074842	1587	736	1383	764	1134	724	556	905	1019	1810	1000	864	852	1013	1394	272	174	184	150	1034	943	2317	1814	1301	1250	710	2279	1145	1058	C19orf10
1293	ENSG00000074855	1889	792	1292	673	851	1365	1290	1466	3005	1533	1973	445	677	1494	2363	362	342	177	184	3287	1679	274	337	662	1246	840	817	1225	1179	ANO8
1294	ENSG00000074935	249	519	572	292	476	471	379	526	524	530	297	337	240	622	591	758	318	723	658	441	396	188	598	440	414	316	561	413	352	TUBE1
1295	ENSG00000074964	2689	1417	2548	1373	2068	2036	1722	2329	3498	2753	4160	1192	1493	2338	3502	1067	876	581	740	3136	2896	991	1149	1882	3933	2197	2871	1940	2343	ARHGEF10L
1296	ENSG00000074966	113	40	115	53	57	96	81	72	144	152	75	126	53	80	199	198	95	114	113	60	93	11	84	168	65	38	99	96	65	TXK
1297	ENSG00000075035	1	132	69	14	301	44	9	36	5	70	111	28	14	49	298	50	35	31	77	276	386	8	143	142	125	117	193	242	68	WSCD2
1298	ENSG00000075043	0	0	0	0	43	2	0	0	0	2	0	9	1	2	2	0	0	0	1	0	0	2	1	2	1	0	0	1	0	KCNQ2
1299	ENSG00000075073	27	9	63	18	19	16	11	31	22	17	25	17	10	27	24	32	22	25	28	22	21	12	9	36	23	20	21	25	35	TACR2
1300	ENSG00000075089	459	497	1013	540	1114	492	380	734	523	779	471	574	566	1066	917	515	161	417	383	887	776	441	1063	1110	792	542	1657	693	559	ACTR6
1301	ENSG00000075131	249	148	241	113	313	155	79	234	255	324	196	222	121	279	368	147	78	146	178	303	85	154	194	164	279	210	177	207	164	TIPIN
1302	ENSG00000075142	1009	828	1882	949	964	721	556	869	963	1251	1250	759	1240	1003	1165	741	395	794	735	1030	1168	1453	1266	868	1440	872	699	1251	1102	SRI
1303	ENSG00000075151	3535	2326	3877	2006	3076	2713	1564	3478	4409	3287	3894	1905	2325	2944	4168	1812	1089	1217	2015	4381	2555	995	1890	1904	2902	3038	1800	3271	3034	EIF4G3
1304	ENSG00000075188	518	267	565	226	522	266	165	428	369	495	302	310	420	528	436	380	178	255	253	508	270	409	621	493	451	518	339	391	280	NUP37
1305	ENSG00000075213	6	134	146	86	88	70	58	32	63	186	129	52	11	31	65	200	186	252	521	11	5	61	95	128	56	16	49	63	155	SEMA3A
1306	ENSG00000075218	377	278	276	130	1438	250	146	323	489	574	331	272	247	940	540	82	33	28	49	439	115	96	289	299	267	402	341	339	100	GTSE1
1307	ENSG00000075223	2726	1654	5123	2186	4068	1524	2721	2171	2327	2412	5266	2422	2324	4433	5401	5595	3228	6237	6260	4877	4092	2776	1470	2673	5955	4391	2514	5010	3883	SEMA3C
1308	ENSG00000075234	572	155	474	248	749	412	263	750	400	532	258	232	333	229	504	265	148	170	159	385	162	481	430	815	598	206	2447	283	415	TTC38
1309	ENSG00000075239	823	457	1118	628	821	615	585	973	890	748	706	587	475	653	880	1098	762	1016	1087	890	880	640	1037	1172	1326	496	2413	720	923	ACAT1
1310	ENSG00000075240	1836	1517	2082	1338	3303	1740	1477	2508	2575	3062	1652	908	1073	1886	2326	736	622	511	662	2064	1312	598	1273	1908	3114	1549	3813	1689	1640	GRAMD4
1311	ENSG00000075275	4697	2291	3326	2338	7896	2025	1792	3424	4506	3488	4045	1429	2841	3977	5214	1146	743	816	1070	6191	4110	908	1589	2300	5195	4923	2818	5655	4575	CELSR1
1312	ENSG00000075290	1	8	11	1	13	6	1	17	2	3	7	9	1	11	4	16	11	8	19	10	6	0	5	4	6	3	7	7	8	WNT8B
1313	ENSG00000075292	2597	3704	4291	2422	5154	2894	2116	3787	3611	3862	3422	2340	2398	3725	4310	8396	4428	6884	7846	3849	2780	735	2208	2821	3818	3296	4519	3187	3092	ZNF638
1314	ENSG00000075303	360	642	763	391	1008	547	422	706	645	935	602	795	397	1228	836	659	207	535	553	716	449	274	746	697	679	615	685	599	610	SLC25A40
1315	ENSG00000075336	584	467	708	389	1112	496	362	742	720	819	604	565	361	864	711	335	177	284	310	800	456	537	647	526	716	569	922	538	423	TIMM21
1316	ENSG00000075340	20	168	34	27	278	22	12	11	14	73	23	204	15	12	27	29	39	30	33	8	4	10	26	41	16	11	40	38	34	ADD2
1317	ENSG00000075388	0	0	0	0	0	0	0	0	0	0	0	2	0	0	0	0	0	0	0	0	0	0	0	0	0	0	0	0	0	FGF4
1318	ENSG00000075391	1739	2255	2316	1240	1634	845	692	1034	1267	1458	1444	1484	1023	1079	1773	2790	1840	2315	2832	1899	1387	366	957	1045	1709	1493	1216	1486	2007	RASAL2
1319	ENSG00000075399	668	256	517	268	376	638	435	613	846	1167	739	322	499	661	880	69	58	55	77	628	593	233	427	939	542	320	651	388	427	VPS9D1
1320	ENSG00000075407	352	1173	1071	537	1199	628	541	884	796	775	721	633	535	864	1155	1348	732	1273	1485	912	537	167	475	662	848	655	806	790	646	ZNF37A
1321	ENSG00000075413	4382	2039	5030	2441	3818	2229	1711	3474	3501	4279	3390	1933	3256	3403	3845	1753	1106	1568	1863	4135	3304	1965	1521	2384	3377	3234	2141	3231	2564	MARK3
1322	ENSG00000075415	11297	7261	12833	6871	10056	6968	4940	9847	9988	11249	8890	5797	7263	11483	11054	5668	3265	3700	3902	9260	7696	13500	11695	10511	13758	9072	23833	9070	8872	SLC25A3
1323	ENSG00000075420	1674	1759	2970	1596	2004	1093	990	1078	1498	1895	1905	899	1600	1112	2952	2164	1622	2121	2814	1577	1144	1122	1123	872	1358	1433	1599	2125	2190	FNDC3B
1324	ENSG00000075426	10556	10010	22720	10575	15456	7489	6829	8522	13313	15711	21602	11213	14386	13463	15738	2834	2282	2372	2968	11907	10385	4975	4228	6379	16007	13064	13367	9367	13707	FOSL2
1325	ENSG00000075429	0	0	0	0	1	0	0	0	0	0	0	2	0	0	0	0	0	0	0	0	0	0	0	0	0	0	0	0	0	CACNG5
1326	ENSG00000075461	4	195	3	2	20	3	1	4	6	3	5	22	1	1	1	4	2	4	4	5	0	34	5	4	6	54	3	5	4	CACNG4
1327	ENSG00000075539	2131	1784	3169	1748	3584	1244	925	1706	1548	2168	1914	1830	1350	2498	2941	6382	3330	4678	5936	3006	1952	602	1696	1759	3789	1801	2393	3380	2944	FRYL
1328	ENSG00000075568	3756	3207	5669	2887	4899	2743	2385	4053	4339	4414	4865	2369	2418	4529	5490	2875	1316	2138	3045	5211	3429	1425	1697	2965	5320	3524	3557	4038	3917	TMEM131
1329	ENSG00000075618	15117	3933	10663	5560	6075	5492	3831	7423	10551	23030	12816	4821	8389	2395	8962	267	206	212	214	10692	8698	11599	2782	4472	10765	12259	5387	8345	7334	FSCN1
1330	ENSG00000075624	102521	43703	101235	52070	76378	45779	39038	55077	97016	184835	103779	74157	86070	57768	95658	13283	7473	8437	7548	70163	55734	129554	58953	57284	74319	71599	61155	60236	64259	ACTB
1331	ENSG00000075643	396	127	1410	542	1134	273	254	698	328	650	466	406	411	359	1035	291	137	313	192	592	1031	478	932	781	886	382	1678	475	737	MOCOS
1332	ENSG00000075651	1701	988	2567	1605	3802	1436	1473	1681	2126	2169	1781	904	1963	2378	2761	3357	2039	2772	3735	2292	1407	848	1338	1278	1699	1078	689	2112	1795	PLD1
1333	ENSG00000075673	1240	1815	796	312	1496	5926	2901	5418	8310	4470	3079	361	1005	4452	2577	440	61	32	535	1053	703	3484	1620	1977	4804	4771	20248	945	1335	ATP12A
1334	ENSG00000075702	788	251	848	376	1110	360	301	544	691	1061	845	960	360	1156	868	94	41	61	65	853	373	169	318	454	390	408	302	692	410	WDR62
1335	ENSG00000075711	3505	2851	5107	2597	5147	2451	2445	3617	4052	3633	4328	1900	3409	3372	4286	3970	2042	2904	3531	4216	2919	1180	2450	2475	3760	3106	3228	3475	2972	DLG1
1336	ENSG00000075785	11109	5482	11754	5906	9975	4315	3811	5507	8238	7807	7742	3675	8586	4717	9007	1392	989	1093	1270	10645	9233	7709	6870	7112	10550	13207	12537	9687	7700	RAB7A
1337	ENSG00000075790	1247	1080	2441	1366	1928	1151	1173	2299	1656	2160	1329	1213	1239	1704	2128	2296	595	1701	1561	1588	1194	1475	1937	2502	2696	1780	6105	1809	1998	BCAP29
1338	ENSG00000075826	237	162	367	125	287	655	440	761	626	721	589	379	251	788	941	192	211	176	227	579	283	10	290	432	276	182	206	218	183	SEC31B
1339	ENSG00000075856	1408	1472	2373	1166	2499	1295	969	1866	2040	2511	1788	1426	1305	2335	2394	1284	966	1079	1199	2040	1216	673	1093	2039	1853	1720	2776	1549	1549	SART3
1340	ENSG00000075884	43	39	340	176	58	113	85	65	91	333	138	235	66	126	324	212	183	172	305	36	22	189	517	455	95	40	58	165	133	ARHGAP15
1341	ENSG00000075886	9	17	22	10	35	9	4	13	11	10	15	11	3	10	17	13	18	9	17	24	15	4	4	20	12	17	62	21	20	TUBA3D
1342	ENSG00000075891	1	42	1	0	6	2	0	2	0	1	0	12	0	0	5	0	0	0	0	1	0	0	0	2	1	0	4	1	0	PAX2
1343	ENSG00000075914	620	625	821	435	1395	498	392	824	598	748	701	378	516	1156	758	820	675	713	746	894	812	558	900	574	1079	536	802	531	536	EXOSC7
1344	ENSG00000075945	1217	1438	1833	866	1337	837	631	1145	1112	1427	1281	685	838	1069	1328	1315	651	903	1019	1468	1232	596	615	757	1102	1424	901	1224	1249	KIFAP3
1345	ENSG00000075975	1210	1007	1810	945	1346	1012	749	1216	1500	1384	1182	536	1044	1602	1426	739	548	696	800	1446	1176	932	1368	915	1457	878	1295	1154	1129	MKRN2
1346	ENSG00000076003	1729	1613	2024	977	3286	1095	643	1452	1826	3562	1542	2575	788	2007	2744	878	319	524	516	2756	850	675	999	1247	1360	1623	1566	1608	1225	MCM6
1347	ENSG00000076043	1289	874	1517	870	1243	787	636	986	1074	1042	923	1251	1386	1020	1002	1120	570	894	719	1142	1411	1173	1714	1092	1187	1029	1050	1124	907	REXO2
1348	ENSG00000076053	444	507	864	482	714	481	347	567	648	609	475	476	740	592	629	559	201	424	467	581	672	676	888	572	607	575	779	633	663	RBM7
1349	ENSG00000076067	358	570	762	417	547	286	211	269	381	386	580	222	344	235	477	340	364	387	390	623	512	227	281	320	547	335	291	425	642	RBMS2
1350	ENSG00000076108	3941	3757	5496	2887	5332	3348	2546	4058	5090	5341	6415	2116	2988	4844	7640	1473	1173	1404	1863	5051	3516	1129	2049	5171	5876	4543	6426	5118	4511	BAZ2A
1351	ENSG00000076201	2087	1643	3136	1440	3334	2097	1751	2953	3544	3533	4107	1058	1734	2993	3396	255	182	185	209	2914	1857	852	941	1148	2480	1397	1870	2045	1983	PTPN23
1352	ENSG00000076242	885	832	1399	677	1743	754	609	997	968	1385	874	570	590	1489	1127	924	457	601	805	1289	742	603	957	713	1176	580	1020	881	917	MLH1
1353	ENSG00000076248	1204	985	1459	856	2743	1174	858	1806	1588	1575	1262	1452	1089	2214	1849	847	476	580	667	1461	863	904	1194	1860	1456	1158	3264	1253	1183	UNG
1354	ENSG00000076258	108	195	181	112	199	110	85	159	153	119	130	86	79	139	147	144	75	165	215	146	151	57	176	124	294	148	101	137	133	FMO4
1355	ENSG00000076321	623	775	1028	591	861	552	410	811	711	866	769	525	557	695	889	822	477	694	746	831	610	271	618	730	919	651	745	890	829	KLHL20
1356	ENSG00000076344	52	33	37	18	31	97	83	83	112	65	82	58	36	37	111	15	21	31	24	71	158	5	34	42	13	12	31	62	46	RGS11
1357	ENSG00000076351	17	48	55	37	78	57	23	51	40	64	38	58	36	58	79	51	51	67	72	51	9	26	39	35	48	45	78	49	44	SLC46A1
1358	ENSG00000076356	1690	1070	3083	1322	2274	851	855	1496	1452	1415	2836	1032	1328	1164	1960	1041	935	657	947	2566	1223	309	583	992	1923	1627	1150	1975	2053	PLXNA2
1359	ENSG00000076382	252	211	195	85	419	126	81	246	303	351	165	193	156	285	219	135	58	73	99	279	73	45	182	163	213	201	182	229	78	SPAG5
1360	ENSG00000076513	4588	2758	5223	2818	3489	2678	2038	2965	4397	4296	4513	2052	2585	4202	4373	3102	1915	2537	2693	3809	3460	1857	3486	3455	3862	2969	3983	2582	3067	ANKRD13A
1361	ENSG00000076554	2929	2072	5132	2478	4889	1778	1486	2666	2891	2993	3927	2101	2346	2786	3103	1483	642	1183	1482	2217	1934	1540	3121	1541	2137	2559	2712	2453	2259	TPD52
1362	ENSG00000076555	208	419	468	231	738	418	408	1065	280	370	505	397	187	420	677	776	918	1138	1253	361	166	39	335	1005	733	232	3771	359	651	ACACB
1363	ENSG00000076604	1227	588	880	515	967	583	268	610	922	1163	1071	387	1020	1301	1062	161	103	121	122	743	2111	851	785	556	1428	801	1269	896	813	TRAF4
1364	ENSG00000076641	509	313	1119	560	660	348	245	406	423	841	598	534	342	373	763	1129	579	730	850	610	466	273	582	644	721	466	870	835	1105	PAG1
1365	ENSG00000076650	302	369	476	238	647	311	257	476	405	638	404	445	220	543	428	349	291	355	341	443	283	163	350	451	404	395	462	327	303	GPATCH1
1366	ENSG00000076662	190	120	864	449	275	353	277	290	358	874	432	447	220	338	926	81	66	59	69	183	73	703	948	1105	315	192	427	418	268	ICAM3
1367	ENSG00000076685	2909	2350	3724	1828	2651	1890	1578	2123	2811	3428	3115	1458	2145	3088	2617	1795	997	1441	1706	3302	2690	1711	1801	2388	3504	3408	3079	2523	2303	NT5C2
1368	ENSG00000076706	5246	1300	7487	3612	2452	1534	847	1621	1709	2495	2706	1503	2439	1229	2811	751	552	799	1129	1532	1350	1638	1919	1506	2318	1606	4857	3262	3895	MCAM
1369	ENSG00000076716	75	2985	280	141	476	109	121	190	96	202	94	74	73	188	175	113	94	145	170	105	102	58	81	112	137	80	424	173	324	GPC4
1370	ENSG00000076770	1491	839	2579	1181	2030	838	681	1232	3199	1344	1296	1020	787	1272	1736	2771	772	1839	2324	2680	1203	643	1075	1142	1812	1136	1327	1737	1797	MBNL3
1371	ENSG00000076826	2178	560	1998	1012	1766	1132	1031	1964	2358	2551	2625	781	1243	3368	2036	194	192	189	198	1550	1310	707	577	1098	1986	1566	2072	1336	1189	CAMSAP3
1372	ENSG00000076864	504	169	248	140	390	97	113	255	311	1179	567	275	332	1240	800	55	46	65	58	245	191	237	334	266	408	523	1014	236	182	RAP1GAP
1373	ENSG00000076924	1121	956	1575	834	1588	1106	857	1420	1508	2386	1711	1215	969	1579	1939	292	268	237	220	1359	992	552	934	1370	1276	1110	1690	1045	1059	XAB2
1374	ENSG00000076928	3641	2355	5012	2381	3158	3637	3174	3953	5400	10544	5308	3540	2534	4951	8150	354	326	246	343	4915	2234	1438	2224	4409	3136	2790	2469	3639	3054	ARHGEF1
1375	ENSG00000076944	781	404	823	393	678	599	423	795	740	1244	748	520	600	887	1115	87	63	61	85	753	567	437	610	738	620	541	790	571	486	STXBP2
1376	ENSG00000076984	1256	948	1572	790	2079	1143	703	1541	1674	2100	1980	1122	1019	1524	1814	191	159	164	189	1829	1265	472	700	1174	1571	1504	1491	1406	1191	MAP2K7
1377	ENSG00000077009	0	0	0	1	0	1	2	0	4	1	0	0	3	1	4	0	0	0	1	1	0	0	3	1	0	0	0	1	2	NMRK2
1378	ENSG00000077044	466	694	877	421	1003	512	360	665	577	1043	1030	624	347	692	1361	284	251	270	288	746	499	102	469	797	764	479	622	628	597	DGKD
1379	ENSG00000077063	42	164	231	123	141	99	63	53	88	85	53	44	21	66	130	329	204	318	256	108	129	29	53	165	85	61	79	99	85	CTTNBP2
1380	ENSG00000077080	2	1	3	0	2	2	1	2	2	4	1	7	1	1	3	1	0	1	4	4	1	0	1	0	1	0	0	0	0	ACTL6B
1381	ENSG00000077092	16	85	44	38	79	29	38	38	30	82	68	69	24	59	97	171	102	224	212	23	18	53	78	52	44	21	36	41	31	RARB
1382	ENSG00000077097	3512	8516	9338	4764	9480	4964	3944	6934	6873	7400	9736	2420	3390	8441	7297	7563	3322	5606	6570	7235	4408	1492	2794	4437	9026	4573	7239	5883	6344	TOP2B
1383	ENSG00000077147	6393	6213	11062	5963	8763	6766	5342	7721	9022	9766	9047	3734	5120	7739	8292	7354	3102	6249	6773	7966	7187	5015	3557	6877	10419	8677	13285	7930	9355	TM9SF3
1384	ENSG00000077150	818	770	2019	1076	1096	1275	1180	1217	1327	3259	1250	961	951	1078	2483	222	162	179	250	1398	1132	820	1099	2030	1152	833	1113	1371	1447	NFKB2
1385	ENSG00000077152	216	278	241	122	799	158	98	220	268	350	131	347	187	462	286	108	24	38	52	362	126	155	445	229	249	286	207	236	116	UBE2T
1386	ENSG00000077157	788	1962	2822	1780	2480	972	649	934	919	1326	2374	1336	877	1310	1862	2447	1475	1895	2849	1675	2374	158	728	938	2122	870	1109	1413	2807	PPP1R12B
1387	ENSG00000077232	2244	2671	3165	1714	2451	2227	1537	2633	2818	4341	2701	1903	1641	2777	3744	2287	1219	1988	2417	2676	1737	1467	2082	2284	2675	2277	2574	2788	2624	DNAJC10
1388	ENSG00000077235	3803	4050	6559	3115	4961	3066	2467	4491	5346	4352	8520	1561	2669	5438	5224	2724	1847	1819	2471	4832	2605	1117	1405	2751	6100	4195	6328	3889	4134	GTF3C1
1389	ENSG00000077238	7624	1871	6336	3715	3118	3930	2042	2937	6958	8812	5227	2129	4565	2413	4879	517	525	393	781	3615	3984	3700	3257	3899	4704	5266	5100	4757	4325	IL4R
1390	ENSG00000077254	1311	2046	3193	1564	3076	1631	1285	2279	1811	2737	1564	1366	1281	2359	2494	3161	1753	2606	3028	2090	1347	704	1637	1994	2660	1854	3407	1710	2074	USP33
1391	ENSG00000077264	2	16	30	12	6	7	11	14	6	15	7	9	6	14	12	229	152	205	145	9	1	11	18	21	17	6	32	20	18	PAK3
1392	ENSG00000077274	24	158	310	100	70	33	13	50	43	32	58	73	98	15	28	42	9	25	35	5	24	37	8	21	109	77	29	46	49	CAPN6
1393	ENSG00000077279	1	8	1	0	5	2	0	3	0	2	0	3	1	2	1	30	3	17	29	0	1	2	3	7	10	10	6	3	4	DCX
1394	ENSG00000077312	1053	687	1142	549	1442	673	507	858	1162	1984	994	1141	846	1088	1253	257	155	219	184	1148	614	899	971	913	841	917	1067	779	751	SNRPA
1395	ENSG00000077327	0	0	2	3	40	0	3	0	1	7	0	6	0	76	4	6	4	13	11	1	1	1	0	5	1	0	2	2	0	SPAG6
1396	ENSG00000077348	463	307	414	255	846	321	307	422	546	768	417	652	454	653	528	104	95	94	93	416	435	567	690	406	669	492	749	429	366	EXOSC5
1397	ENSG00000077380	5120	2527	5021	2574	3619	2484	1729	3200	3544	3999	4674	1838	2793	2922	3715	2856	1500	2431	2447	4151	3982	2848	2352	2451	2828	2444	2492	4195	3975	DYNC1I2
1398	ENSG00000077420	66	59	639	330	179	213	154	149	159	985	353	285	147	230	681	81	101	101	154	66	17	258	684	628	767	69	159	362	219	APBB1IP
1399	ENSG00000077454	859	686	1316	611	1022	1244	1022	1388	1550	3605	1959	1772	673	3238	2560	172	154	128	163	1141	847	362	1085	1585	1019	701	1365	1012	971	LRCH4
1400	ENSG00000077458	736	1187	1348	701	1113	716	668	931	812	1128	1168	1121	632	1606	1398	1118	468	1075	1007	1134	942	205	873	1102	1218	719	715	917	818	FAM76B
1401	ENSG00000077463	596	317	670	332	535	413	300	597	642	878	650	367	431	506	743	53	50	34	40	692	539	384	578	538	582	342	544	469	376	SIRT6
1402	ENSG00000077498	387	687	387	525	857	401	603	396	444	231	189	364	86	653	632	1829	239	764	555	475	686	235	919	696	1146	293	384	404	571	TYR
1403	ENSG00000077514	777	961	1212	606	1602	604	419	922	915	1459	812	1513	641	1445	1079	633	376	472	587	1186	527	351	841	706	917	706	882	776	746	POLD3
1404	ENSG00000077522	3	68	7	6	21	3	12	4	4	6	5	60	5	4	8	7	2	5	9	1	2	0	7	8	6	4	4	3	6	ACTN2
1405	ENSG00000077549	8967	3955	11189	5325	6710	4088	2711	5407	6172	9451	6886	3885	5453	5763	6788	1482	1067	1106	1334	5422	4272	8197	6635	6028	6440	5396	6572	6042	5800	CAPZB
1406	ENSG00000077585	669	1577	1553	896	1165	714	567	921	998	1118	883	451	763	856	1059	714	404	511	581	718	807	1449	1066	884	1078	825	1703	1030	840	GPR137B
1407	ENSG00000077616	35	99	70	40	114	51	61	75	57	82	42	364	55	31	61	195	71	226	218	48	33	19	54	66	68	58	77	64	62	NAALAD2
1408	ENSG00000077684	351	501	822	496	1723	515	403	680	487	872	683	575	240	866	790	969	615	829	949	666	329	145	469	742	895	355	1345	611	619	PHF17
1409	ENSG00000077713	1522	897	1733	949	1537	1042	850	1405	1747	1434	1451	1012	1190	1305	1645	619	335	522	708	1423	1193	1374	1211	1366	1506	1217	2157	1375	1384	SLC25A43
1410	ENSG00000077721	2646	1842	3754	1883	2336	1711	1542	2105	2503	2804	2379	1714	2258	2468	2522	997	447	712	789	2478	2276	2027	2640	2145	2883	2379	3219	2486	2223	UBE2A
1411	ENSG00000077782	865	1614	2477	1450	748	998	847	974	1113	1544	1532	967	595	532	1252	953	994	785	995	476	242	637	596	1213	1373	456	1295	1046	2017	FGFR1
1412	ENSG00000077800	1	1	4	2	25	12	11	10	4	5	1	8	3	12	5	1	1	2	2	6	5	1	7	3	9	4	5	3	3	FKBP6
1413	ENSG00000077809	3988	6862	8046	4205	10289	5358	4825	8536	6668	7677	7117	4922	4307	7576	7998	3252	1784	2519	3434	7028	4776	2329	3757	4615	6723	5802	6850	5600	5008	GTF2I
1414	ENSG00000077935	3	11	11	3	764	71	4	13	12	68	22	59	19	418	253	39	17	43	39	11	5	3	8	25	11	10	19	25	16	SMC1B
1415	ENSG00000077942	815	3903	5564	3208	7149	3587	3612	3440	2526	9646	11831	2956	3455	2747	5358	4142	3023	3142	2980	1479	806	3479	1353	2166	5265	2413	3841	3340	5260	FBLN1
1416	ENSG00000077943	99	107	199	117	219	225	128	306	164	213	275	94	148	122	277	590	326	315	281	107	78	109	168	301	95	90	461	141	262	ITGA8
1417	ENSG00000077984	63	36	735	347	94	123	118	58	87	621	176	311	116	100	388	33	14	12	36	52	20	768	1007	933	55	23	142	318	229	CST7
1418	ENSG00000078018	4335	1210	2503	1519	1774	1292	1135	1083	3800	961	1807	558	1127	989	1401	2523	967	1421	1830	3987	2565	1255	954	965	2316	1143	988	2510	3182	MAP2
1419	ENSG00000078043	444	793	833	476	1381	529	501	738	690	1091	983	798	406	798	873	1435	661	1154	1251	855	639	379	700	898	982	600	925	667	701	PIAS2
1420	ENSG00000078053	29	24	70	39	179	25	19	14	21	44	17	54	19	10	43	37	19	77	105	18	2	32	31	47	25	20	23	71	58	AMPH
1421	ENSG00000078061	1409	1253	2074	1053	2006	1233	934	1693	1822	2563	2033	1616	1523	2040	2387	322	240	280	265	1577	1325	1336	1404	1639	1658	1374	1858	1495	1347	ARAF
1422	ENSG00000078070	530	585	725	392	1894	573	420	1001	687	529	591	443	619	1123	913	952	572	767	779	718	533	349	770	1177	1060	994	2550	591	501	MCCC1
1423	ENSG00000078081	448	349	1954	949	2526	740	655	843	851	3352	494	1192	573	571	3765	161	56	91	245	409	136	866	1615	2069	600	312	839	1709	794	LAMP3
1424	ENSG00000078098	408	474	1335	750	154	285	90	115	355	468	377	207	272	150	356	428	477	399	269	233	67	369	195	133	312	265	136	578	810	FAP
1425	ENSG00000078114	3151	1683	3743	1924	3491	2153	2231	3021	2985	2798	2502	2628	1651	2694	3286	6383	1954	3490	4520	2558	2389	1202	2528	3227	3365	1911	4480	2602	3081	NEBL
1426	ENSG00000078124	1367	2071	2272	1264	1419	1220	740	1478	1555	1721	1252	751	955	888	1953	992	262	550	897	915	1269	885	963	1113	1888	1212	3277	1537	1812	ACER3
1427	ENSG00000078140	3910	3410	5685	3098	4357	3489	2464	4609	5245	5525	5114	2392	3747	4832	5528	2285	790	2159	2315	5813	4302	2735	3251	3247	5535	4615	6078	5092	4899	UBE2K
1428	ENSG00000078142	995	1265	2079	1039	1929	906	796	1150	1047	1385	1403	822	762	1818	1594	2587	1330	2164	2412	1449	1134	564	1149	1395	1780	1176	1510	1228	1488	PIK3C3
1429	ENSG00000078177	729	848	1127	551	1127	455	294	569	699	831	796	641	441	779	941	1993	987	1614	1786	1120	992	262	472	673	1892	1132	878	1504	1092	N4BP2
1430	ENSG00000078237	960	449	814	380	1116	312	200	304	500	684	712	276	579	474	584	134	65	98	106	570	579	799	550	368	576	416	777	2347	760	C12orf5
1431	ENSG00000078246	664	864	1046	538	959	585	477	769	831	1275	1033	706	703	780	1141	649	569	574	636	1091	612	294	636	722	791	755	613	553	886	TULP3
1432	ENSG00000078269	1204	755	1263	709	842	823	429	884	1207	1744	783	916	811	798	1388	504	466	447	662	999	725	533	649	852	939	1122	1533	1130	1051	SYNJ2
1433	ENSG00000078295	139	575	157	128	435	108	170	187	292	182	81	68	8	81	181	739	324	655	865	164	149	26	205	253	312	26	45	174	189	ADCY2
1434	ENSG00000078304	4725	2632	5593	3124	6372	2912	2403	3703	4315	5320	4033	3593	4351	4518	4776	3555	1977	2663	3494	4245	3880	3400	3582	4795	4314	3307	3487	4472	3889	PPP2R5C
1435	ENSG00000078319	103	96	151	78	181	64	65	87	99	124	99	146	96	133	141	70	52	60	77	125	75	137	142	117	126	118	126	104	87	PMS2P1
1436	ENSG00000078328	14	510	1	3	4	0	4	5	3	5	1	5	2	1	3	14	2	3	4	3	6	2	2	5	10	1	0	4	4	RBFOX1
1437	ENSG00000078369	9372	8751	14620	7600	11662	5771	4694	7895	8885	13071	10326	5316	6881	9472	10770	2417	1850	2054	2731	8735	6888	9609	8174	9147	9645	9382	12174	9298	8997	GNB1
1438	ENSG00000078399	63	394	644	340	716	123	100	158	151	343	296	426	29	766	216	220	15	46	217	231	124	101	17	145	18	384	1	126	88	HOXA9
1439	ENSG00000078401	257	2438	530	313	746	233	238	394	241	484	765	683	809	603	484	286	162	186	251	513	266	133	333	254	625	159	263	185	494	EDN1
1440	ENSG00000078403	1370	1888	2179	1043	2001	1156	922	1523	1568	1766	1507	1244	958	1444	1726	2099	1244	1750	2023	1939	1079	321	1243	1483	1826	1205	1631	1124	1105	MLLT10
1441	ENSG00000078487	89	228	143	70	237	167	124	175	162	165	112	193	127	329	159	149	87	122	185	180	97	50	182	148	183	77	133	149	106	ZCWPW1
1442	ENSG00000078549	92	59	125	78	78	85	55	55	82	137	74	38	16	28	51	82	63	75	83	94	18	27	30	102	105	35	85	51	182	ADCYAP1R1
1443	ENSG00000078579	0	0	0	0	1	2	0	1	1	0	0	2	0	0	1	5	2	0	1	0	0	1	0	2	2	0	0	0	0	FGF20
1444	ENSG00000078589	13	7	262	101	33	62	55	29	35	186	55	68	26	49	194	20	23	13	31	12	8	88	218	318	53	10	18	174	56	P2RY10
1445	ENSG00000078596	298	1383	900	445	749	332	785	485	188	954	610	481	235	590	841	818	426	531	1030	245	348	939	898	1118	731	310	1327	685	1153	ITM2A
1446	ENSG00000078618	5719	3757	8611	4264	9466	5047	4561	6270	8412	7395	6567	4526	4234	6524	7922	4654	2703	3480	3442	6040	6642	4051	4058	4505	6606	6027	5873	6531	5846	NRD1
1447	ENSG00000078668	2027	1561	2361	1287	2419	1609	1161	2006	2028	2420	1452	1503	1483	2117	2510	1324	832	1027	1248	1994	1536	2045	2455	1607	2275	2372	3226	1949	1671	VDAC3
1448	ENSG00000078674	2393	4033	5082	2792	4484	2557	1932	3346	3538	3897	3224	2339	1928	4587	4601	7052	4095	5590	6878	3557	2340	815	1760	2431	4356	4156	5458	3521	3439	PCM1
1449	ENSG00000078687	169	1460	594	278	567	303	200	350	339	386	398	242	130	296	567	476	332	457	605	474	165	71	197	502	487	252	512	404	451	TNRC6C
1450	ENSG00000078699	727	1137	1721	956	1862	1002	891	1349	1279	1500	1733	964	664	1688	1938	818	450	605	901	1457	766	241	924	1231	1649	867	1533	1293	1066	CBFA2T2
1451	ENSG00000078725	59	50	119	43	70	38	24	25	73	17	87	26	17	8	67	10	1	2	15	12	126	246	44	7	511	122	34	138	74	DBC1
1452	ENSG00000078747	2475	1840	3336	1808	3157	1766	1467	1987	2439	2788	4332	1583	1745	2493	3229	3397	2075	2714	3008	2372	3121	1515	1752	2306	3401	3101	3168	2682	2430	ITCH
1453	ENSG00000078795	6	7	7	3	8	13	8	14	3	11	7	8	9	2	9	66	28	64	80	8	4	0	13	6	12	10	3	8	5	PKD2L2
1454	ENSG00000078804	1151	1082	1747	895	1216	1335	738	1237	1311	1154	2703	596	995	1090	1755	131	80	102	147	750	1514	1149	665	1292	3552	2510	3770	1338	1982	TP53INP2
1455	ENSG00000078808	3144	2021	3218	1868	3921	2179	1492	2940	3284	5401	3713	2161	2450	2875	3921	659	493	448	520	3440	2368	2954	2367	2968	3696	3183	5255	3400	2984	SDF4
1456	ENSG00000078814	22	97	47	17	75	57	40	81	83	52	69	68	55	77	101	49	34	56	47	56	34	3	26	53	27	24	34	25	40	MYH7B
1457	ENSG00000078898	0	0	0	0	0	0	0	0	0	0	0	2	0	0	0	0	0	0	0	0	0	0	0	1	1	0	0	0	0	BPIFB2
1458	ENSG00000078900	514	1498	727	317	1869	780	551	1677	718	1007	1423	517	720	1227	1268	87	70	56	77	751	508	333	247	979	1416	836	1615	623	741	TP73
1459	ENSG00000078902	4743	1968	4906	2545	4105	2765	2016	3645	5339	4798	4420	1289	3227	4277	4063	501	415	404	485	3535	3342	2811	1636	3591	4379	3438	6934	3543	3312	TOLLIP
1460	ENSG00000078967	79	81	131	50	111	55	50	82	91	151	94	92	57	115	124	78	54	53	98	76	44	92	90	99	99	73	83	70	73	UBE2D4
1461	ENSG00000079101	0	2	1	2	43	3	3	5	6	5	6	4	2	12	9	6	6	10	16	0	4	2	6	2	9	2	6	4	0	CLUL1
1462	ENSG00000079102	93	807	307	210	211	146	124	129	169	233	232	142	71	62	189	847	505	758	815	84	25	87	133	209	221	81	190	119	294	RUNX1T1
1463	ENSG00000079112	1	5	7	2	7	6	2	6	10	1	11	5	15	10	8	15	10	3	8	12	2	1	8	11	14	22	1	1	4	CDH17
1464	ENSG00000079134	790	920	1084	624	1851	788	592	1011	1014	1201	1164	1082	720	1666	1197	1712	792	1474	1471	1254	740	350	757	806	967	737	858	824	704	THOC1
1465	ENSG00000079150	155	292	346	166	173	130	102	139	166	217	206	155	114	124	188	233	103	237	279	140	90	190	148	133	182	150	135	219	338	FKBP7
1466	ENSG00000079156	1042	299	1161	723	1261	629	557	782	1089	1013	631	280	348	675	1066	989	749	646	981	1472	917	265	619	923	482	466	1173	803	638	OSBPL6
1467	ENSG00000079215	431	466	1576	911	1277	887	437	922	901	1718	970	590	957	1681	990	449	314	270	411	1030	1109	427	721	575	365	695	1115	683	1142	SLC1A3
1468	ENSG00000079246	10420	9295	11914	6193	12683	6495	4138	9343	9773	14674	11405	6446	6987	9585	11124	7281	4298	5831	6360	12506	8172	7251	7525	8480	11159	9708	11096	10090	9446	XRCC5
1469	ENSG00000079257	191	138	261	125	128	110	83	131	108	150	80	112	115	101	117	251	127	199	250	158	150	122	327	186	170	90	224	133	138	LXN
1470	ENSG00000079263	13	14	223	96	36	130	91	43	57	246	80	107	41	52	259	57	58	58	132	27	7	47	137	216	45	20	19	117	42	SP140
1471	ENSG00000079277	1224	836	1616	741	1615	1111	576	1418	1497	1773	1181	723	895	1092	1706	613	526	518	696	1337	883	600	1448	1348	1422	1272	1612	1056	1036	MKNK1
1472	ENSG00000079308	1205	2537	4366	2414	3799	1579	986	2340	1753	2327	3630	1473	788	1023	2916	1901	1836	1798	2742	3204	1321	429	970	1661	2871	2294	3668	3259	5100	TNS1
1473	ENSG00000079313	1137	844	1098	584	1269	816	618	1118	1557	2193	1594	1070	648	1810	1605	130	114	85	94	1296	980	302	604	1046	1157	581	1230	1004	1021	REXO1
1474	ENSG00000079332	2902	2601	4534	2471	4082	2338	1863	3008	3038	4335	3061	2181	2525	3229	3191	2584	1533	2282	2518	2782	2853	2473	1925	2915	3176	2532	3817	2609	3057	SAR1A
1475	ENSG00000079335	112	235	432	215	303	219	207	395	209	351	358	258	161	233	486	464	293	424	524	210	197	56	256	587	361	191	508	268	301	CDC14A
1476	ENSG00000079337	399	239	291	207	303	326	299	290	261	680	554	219	379	264	454	283	314	308	455	367	451	184	152	159	256	335	317	312	502	RAPGEF3
1477	ENSG00000079385	107	68	91	42	99	160	108	198	227	476	43	25	128	55	95	123	115	114	185	151	89	215	353	132	357	94	2048	96	99	CEACAM1
1478	ENSG00000079387	691	755	1342	674	1324	582	480	893	922	1140	842	692	621	1112	1094	696	488	534	627	1013	668	455	733	860	896	991	869	876	711	SENP1
1479	ENSG00000079393	5	3	7	3	14	17	9	15	12	46	14	5	4	22	10	9	2	0	3	6	11	46	20	14	35	10	129	12	8	DUSP13
1480	ENSG00000079432	2617	4279	4581	2350	4751	2985	2607	4077	5332	6423	5849	2754	1913	5797	5562	339	270	265	300	3693	2486	778	1476	2446	5020	2543	3931	3907	4057	CIC
1481	ENSG00000079435	164	106	107	55	372	106	64	97	222	210	293	84	166	383	294	44	62	122	127	156	178	96	108	99	244	201	188	134	111	LIPE
1482	ENSG00000079459	4346	3781	5592	2384	8219	3427	1817	6601	4564	4265	5043	1687	5923	5223	5792	1979	876	1409	1418	5735	4772	6176	6522	5933	9863	5873	25428	4397	3847	FDFT1
1483	ENSG00000079462	207	486	278	141	463	148	115	229	228	340	212	390	181	308	321	66	31	31	31	268	143	287	656	158	191	230	357	216	168	PAFAH1B3
1484	ENSG00000079482	132	341	394	229	523	231	223	267	266	215	321	165	165	353	446	1141	754	984	1094	352	316	121	165	243	435	202	328	420	467	OPHN1
1485	ENSG00000079557	1	0	0	2	0	0	0	1	0	2	0	0	0	1	0	1	1	1	4	2	0	0	4	0	0	0	0	0	0	AFM
1486	ENSG00000079616	1397	999	1659	814	2638	1675	1403	2429	2761	2393	2095	2161	1093	3433	1818	741	478	513	552	2057	1246	541	1464	1411	1535	1355	1336	1328	980	KIF22
1487	ENSG00000079689	0	0	0	0	6	0	0	4	0	0	0	0	0	0	8	1	0	0	0	4	2	0	36	1	5	0	11	8	2	SCGN
1488	ENSG00000079691	939	1119	1321	748	1334	606	472	857	954	1452	1549	600	790	1587	1696	1575	939	966	1378	993	1020	352	463	640	1659	1145	918	960	832	LRRC16A
1489	ENSG00000079739	1340	1611	2147	1067	1393	1286	868	2134	2020	1768	1264	820	848	1094	1496	538	365	465	452	1092	906	1483	1634	1710	2635	1320	3735	875	1194	PGM1
1490	ENSG00000079785	4917	3446	6574	3260	5795	2828	1625	4560	4103	5748	4816	3776	4260	5059	5014	2712	1392	2179	2184	4904	4128	2604	3257	3071	5607	5159	4792	4074	3769	DDX1
1491	ENSG00000079805	6737	3879	7680	4111	7448	5431	4202	6307	8519	10205	7935	4175	4061	7235	9371	1871	1506	1390	1932	7506	5338	3413	4102	4931	6393	5040	6714	5771	5412	DNM2
1492	ENSG00000079819	707	1473	1830	1055	1355	1097	729	1168	1102	2020	1437	904	513	654	1660	2052	1345	2187	2425	578	239	403	832	1184	1224	636	1068	1110	1913	EPB41L2
1493	ENSG00000079841	0	0	1	0	1	1	1	2	1	1	2	3	0	0	5	164	132	267	158	0	0	1	1	5	7	0	3	6	2	RIMS1
1494	ENSG00000079931	956	948	2530	1516	2117	2397	981	2309	3862	2211	2717	643	1590	1387	1907	598	250	205	586	569	2852	1714	2701	2154	4913	956	4240	1440	1781	MOXD1
1495	ENSG00000079950	1474	1373	2387	1311	1500	1251	1054	1488	1645	1789	1359	1058	1625	1712	2133	2635	1208	2278	2404	1748	1889	1079	1940	1454	1996	1222	1473	1677	1931	STX7
1496	ENSG00000079974	297	552	439	250	780	514	406	653	571	878	543	343	121	657	688	172	124	119	133	566	307	153	363	417	454	333	606	344	383	RABL2B
1497	ENSG00000079999	1892	1370	2596	1414	4002	1437	1047	1858	2168	3192	1977	1365	1505	2108	2613	536	438	431	390	2309	1549	1493	2022	2100	2875	1939	3034	2121	1618	KEAP1
1498	ENSG00000080007	73	3	154	97	1	5	7	8	11	45	60	115	10	13	180	33	39	26	33	7	198	35	21	37	174	13	66	7	31	DDX43
1499	ENSG00000080031	21	14	6	14	63	14	45	26	15	94	41	71	46	50	25	9	10	6	7	26	30	53	89	11	37	126	11	15	12	PTPRH
1500	ENSG00000080166	1182	466	2500	2710	8766	2133	3047	1246	1603	2051	2147	363	79	1283	3262	16281	2031	7697	5265	4525	4255	454	2617	3641	4126	676	3073	2857	3404	DCT
1501	ENSG00000080189	1132	996	1808	937	2399	1061	882	1431	1462	2000	1593	1227	1217	1836	1873	462	339	403	382	1634	1153	1115	1535	1459	1643	1393	1509	1470	1215	SLC35C2
1502	ENSG00000080200	1412	766	2095	1269	2099	1170	797	1319	1844	1681	1880	863	1389	1705	2109	2980	1606	2407	2527	1477	1494	760	883	1143	1854	1446	1591	1336	1496	CRYBG3
1503	ENSG00000080224	1	0	1	2	25	0	1	2	3	3	1	2	0	3	0	13	5	12	26	2	1	1	3	35	2	1	3	2	2	EPHA6
1504	ENSG00000080293	1	26	10	4	18	6	2	14	2	4	1	3	5	9	13	19	32	19	17	17	0	3	6	14	3	1	0	9	7	SCTR
1505	ENSG00000080298	127	643	405	226	403	154	159	279	155	304	295	251	112	253	426	605	280	597	626	162	174	54	192	270	303	298	240	272	339	RFX3
1506	ENSG00000080345	1893	1883	2409	1190	2874	1249	1005	1534	1939	1921	2324	3496	1206	2941	3133	7270	3665	6087	6003	3004	2407	529	1302	1775	3345	3279	3370	3003	2419	RIF1
1507	ENSG00000080371	1598	2018	3253	1758	2277	1709	1245	2158	2713	2500	2281	896	2048	2350	3270	2130	927	1782	2102	2334	1864	1561	1879	2366	2888	2289	2932	2528	2415	RAB21
1508	ENSG00000080493	0	12	3	2	15	2	7	5	6	7	14	23	1	3	12	53	27	71	65	3	5	7	6	15	30	13	5	2	11	SLC4A4
1509	ENSG00000080503	1998	3942	4714	2666	5794	3067	2597	4579	3315	5028	3811	2282	1399	4158	5676	3723	2590	3680	4445	3669	1905	943	2031	3320	5504	2835	4736	3773	4141	SMARCA2
1510	ENSG00000080511	4	1	11	5	0	0	1	1	0	3	0	2	1	2	2	0	0	1	0	0	1	7	2	0	0	0	0	0	2	RDH8
1511	ENSG00000080546	518	2660	1428	716	1296	883	873	1118	872	1292	1806	889	526	1182	1284	1350	906	962	1047	957	650	455	1228	1226	1249	1077	2550	766	879	SESN1
1512	ENSG00000080561	1210	272	1613	747	667	479	388	626	1143	455	1219	166	463	519	791	711	441	539	623	1028	1105	514	356	765	906	733	951	923	797	MID2
1513	ENSG00000080572	0	1	1	1	0	0	0	0	0	0	0	0	0	1	0	0	0	0	0	0	0	0	0	0	1	1	0	0	0	PIH1D3
1514	ENSG00000080573	3456	2497	3544	1848	1598	1565	1115	1627	3551	4009	2047	1539	1295	3817	4605	810	454	474	816	1503	583	521	345	466	1311	1125	911	1658	2259	COL5A3
1515	ENSG00000080603	4232	3939	6265	3253	9096	3493	2400	4504	5810	6126	7670	2523	3458	5324	7095	663	471	592	777	7030	3950	1752	2148	4059	5612	4952	6597	5551	5208	SRCAP
1516	ENSG00000080608	1587	775	1286	705	1322	1009	497	1423	1856	2268	1075	1066	1062	972	1744	1173	668	946	1038	1529	1348	664	678	725	1378	1746	1597	1202	924	KIAA0020
1517	ENSG00000080618	0	1	3	4	5	2	0	0	1	5	3	1	3	8	2	13	2	18	12	6	1	3	4	8	4	2	20	5	1	CPB2
1518	ENSG00000080644	69	64	81	73	269	88	187	117	316	254	48	144	56	218	234	13	13	23	38	56	79	98	56	186	227	75	86	209	126	CHRNA3
1519	ENSG00000080709	10	13	13	17	26	8	12	10	12	14	8	11	7	15	12	11	10	15	9	18	10	1	7	7	20	6	21	9	20	KCNN2
1520	ENSG00000080802	567	627	865	445	979	594	465	778	857	891	821	610	635	675	1004	849	486	873	956	795	555	426	552	649	766	814	925	725	611	CNOT4
1521	ENSG00000080815	2000	2280	3340	1851	3286	1750	1428	2462	2582	3662	3072	1458	2486	3248	3564	2335	2109	2194	2494	2440	2185	1945	1572	2632	2652	2041	3521	2533	2327	PSEN1
1522	ENSG00000080819	762	504	877	477	1141	741	543	989	984	1158	857	484	655	864	1138	455	226	425	395	722	317	379	694	757	611	889	1111	738	558	CPOX
1523	ENSG00000080822	1185	1191	1843	1066	2480	1743	1248	2002	2285	2044	1909	1574	2954	2022	2579	1908	927	1339	1510	1958	1657	1660	2980	2447	1669	2150	1830	1560	1045	CLDND1
1524	ENSG00000080823	179	338	354	163	426	202	208	345	427	388	311	438	164	359	282	284	166	236	276	354	355	36	154	218	313	450	333	134	156	MOK
1525	ENSG00000080824	29288	17551	28358	14088	43915	16451	11281	28565	25769	33608	18958	16524	27269	28400	23838	8653	4292	6439	6517	29963	19539	14352	12158	15079	33442	25883	35157	31866	20588	HSP90AA1
1526	ENSG00000080839	532	609	851	429	1345	356	489	586	572	945	727	717	356	747	911	685	207	391	478	944	208	136	284	389	464	807	397	759	418	RBL1
1527	ENSG00000080845	2727	2160	3793	1877	2763	2236	2061	2896	3256	3382	5649	1134	2431	2014	4138	504	321	327	452	3221	2486	1951	1227	1571	3179	2647	2411	2912	3326	DLGAP4
1528	ENSG00000080854	209	304	82	56	201	71	41	89	130	105	21	134	36	141	101	71	54	31	81	281	63	63	35	37	433	541	198	130	167	IGSF9B
1529	ENSG00000080910	0	0	0	0	0	0	0	0	0	0	0	1	0	0	0	0	0	0	0	0	0	0	0	0	0	0	0	0	0	CFHR2
1530	ENSG00000080947	60	109	107	48	130	83	93	123	123	175	145	79	41	103	163	177	172	183	223	131	47	3	53	94	93	58	82	96	111	CROCCP3
1531	ENSG00000080986	437	327	335	146	2053	243	110	362	399	496	358	332	306	1129	558	314	58	108	111	463	151	142	360	374	376	384	278	366	113	NDC80
1532	ENSG00000081014	1502	875	2404	1081	1674	885	693	1202	1486	1451	1712	717	982	1199	1598	1280	623	1042	1323	2127	1409	524	1040	1151	1681	1279	1545	1583	1441	AP4E1
1533	ENSG00000081019	441	869	1297	656	1267	650	575	793	848	1106	975	557	539	1067	1197	1222	558	1135	1309	763	736	422	700	924	971	824	1174	819	1018	RSBN1
1534	ENSG00000081026	364	304	710	333	1107	259	176	356	395	350	416	333	362	810	615	738	579	697	889	413	287	121	262	309	527	460	389	412	488	MAGI3
1535	ENSG00000081041	103	11	84	41	15	41	68	35	73	230	30	48	95	41	63	34	7	14	8	87	44	195	144	158	333	37	53	64	472	CXCL2
1536	ENSG00000081051	0	0	0	0	0	0	0	0	0	1	0	0	0	0	0	1	0	0	0	3	3	1	1	1	0	0	0	4	0	AFP
1537	ENSG00000081052	37	206	1264	516	136	201	132	82	152	421	432	310	86	165	800	161	72	125	261	39	19	204	338	200	86	43	73	303	444	COL4A4
1538	ENSG00000081059	500	348	1092	494	360	475	578	684	756	1236	747	767	246	348	1426	507	316	391	515	451	230	397	986	1514	840	629	633	726	681	TCF7
1539	ENSG00000081087	1162	1276	2186	1293	1539	1069	1057	1099	1271	1721	1170	811	1319	1702	1760	1103	374	786	868	1181	1615	1062	1739	1277	1468	943	1632	1779	1477	OSTM1
1540	ENSG00000081138	0	1	2	0	10	2	2	1	0	1	1	5	0	0	0	14	9	11	2	0	0	0	0	3	0	0	18	0	1	CDH7
1541	ENSG00000081148	21	4	68	33	15	2	2	12	9	8	4	7	3	5	7	67	27	37	54	17	3	3	7	5	5	12	3	11	11	IMPG2
1542	ENSG00000081154	2947	3908	4533	2453	5112	2395	2145	3242	2948	4471	4111	2427	3343	5432	4203	2898	894	2444	2654	3297	3312	2940	3545	3689	4193	3616	3859	3369	3648	PCNP
1543	ENSG00000081177	584	957	957	544	931	607	443	832	821	673	567	438	567	794	788	491	318	368	478	774	360	529	380	633	810	700	1027	800	544	EXD2
1544	ENSG00000081181	134	86	230	127	147	152	41	178	188	111	212	299	110	103	110	114	79	88	124	137	438	472	80	346	263	346	272	201	144	ARG2
1545	ENSG00000081189	465	313	1146	611	621	516	412	350	408	787	594	423	166	358	854	1139	583	1005	1069	351	154	234	483	661	557	172	423	501	944	MEF2C
1546	ENSG00000081237	566	520	6525	3164	1107	2380	1756	1108	1759	8958	2821	2465	988	1625	6367	1453	1155	1258	2142	780	273	1393	3686	6691	1342	569	1325	3807	2128	PTPRC
1547	ENSG00000081248	1	2	1	1	2	1	0	4	1	1	6	4	2	4	5	7	4	4	2	1	21	2	4	3	2	3	1	6	3	CACNA1S
1548	ENSG00000081277	129646	57804	161622	75595	131478	48361	44938	84716	110431	93126	120925	37365	83362	70771	107197	15893	13179	12235	14112	134286	52866	26196	20894	32924	65235	55823	46263	85086	79515	PKP1
1549	ENSG00000081307	1130	1005	1802	967	1960	1196	927	1391	1585	1989	1415	919	1072	1760	1931	1423	482	1206	1215	1535	1113	708	1345	1174	1517	1582	1663	1353	1273	UBA5
1550	ENSG00000081320	832	830	4481	2285	1661	1442	1237	1105	1491	3983	2292	1578	975	1161	3442	2335	1194	1830	2566	1192	886	1264	2388	3295	1340	858	991	2599	2623	STK17B
1551	ENSG00000081377	948	523	1567	833	1019	651	414	787	901	800	1264	548	652	536	880	508	447	565	652	822	1033	316	555	848	1270	413	473	867	1120	CDC14B
1552	ENSG00000081386	218	392	498	309	754	396	297	508	384	425	476	512	446	576	527	850	537	721	765	429	391	146	458	833	740	387	1501	494	400	ZNF510
1553	ENSG00000081479	3	2370	5	3	11	2	2	2	4	10	1	1	8	2	2	14	0	4	8	3	1	0	0	2	0	1	4	0	2	LRP2
1554	ENSG00000081665	217	500	553	245	642	375	332	372	402	604	454	323	317	531	558	1257	548	1260	1448	428	393	169	614	571	451	207	521	437	322	ZNF506
1555	ENSG00000081692	122	113	161	68	214	95	77	121	161	194	127	108	119	131	117	92	63	82	75	135	96	73	96	156	136	143	305	101	124	JMJD4
1556	ENSG00000081721	588	443	573	299	730	348	280	496	497	636	561	476	379	545	514	303	126	223	194	559	595	368	672	555	688	477	414	418	393	DUSP12
1557	ENSG00000081760	2053	1332	2328	1258	2773	2289	1570	4362	2269	2199	1653	1222	1208	1929	2844	1356	911	1280	1244	1801	1635	1105	1370	2795	4666	1449	8194	1679	2086	AACS
1558	ENSG00000081791	1212	1021	1784	875	1500	1282	984	1584	1713	2060	1446	1304	956	2020	2110	755	644	696	931	1593	887	695	1516	1291	1599	1134	1755	1214	1209	KIAA0141
1559	ENSG00000081800	0	0	0	0	0	0	0	0	0	0	0	1	0	0	0	0	0	1	0	0	0	0	0	0	0	0	0	0	0	SLC13A1
1560	ENSG00000081803	180	126	599	293	244	184	136	169	173	314	280	153	136	166	569	467	341	545	437	153	277	195	340	268	492	123	212	330	416	CADPS2
1561	ENSG00000081818	20	19	95	43	55	48	43	46	78	87	55	29	42	50	80	33	27	49	46	38	133	18	13	43	48	79	56	59	73	PCDHB4
1562	ENSG00000081842	3	92	3	1	8	3	16	2	1	4	0	0	0	0	3	4	4	2	7	0	3	1	0	0	2	16	1	1	3	PCDHA6
1563	ENSG00000081853	19	13	23	18	13	33	21	20	38	38	15	9	5	12	27	36	20	30	60	23	22	14	5	8	45	15	20	22	17	PCDHGA2
1564	ENSG00000081870	438	332	528	235	643	337	239	417	399	550	368	501	389	602	511	391	203	310	371	437	446	498	917	526	455	434	372	351	326	HSPB11
1565	ENSG00000081913	1127	679	1670	882	1968	879	669	1521	1680	1419	2515	1267	846	1072	1669	813	524	564	773	1542	1021	362	505	949	1662	1082	1572	898	1009	PHLPP1
1566	ENSG00000081923	1341	1170	2045	1059	2276	1162	984	1780	2018	1642	2347	745	974	1306	1922	1462	869	1162	1428	1652	1017	566	877	1407	1688	1923	2209	1177	1748	ATP8B1
1567	ENSG00000081985	487	120	477	214	610	176	209	236	481	840	345	611	197	281	1685	133	91	95	105	234	267	110	420	728	864	377	151	350	228	IL12RB2
1568	ENSG00000082014	153	1363	307	238	1074	863	532	744	672	1139	582	471	263	536	868	194	120	172	218	416	176	353	979	697	706	294	869	276	425	SMARCD3
1569	ENSG00000082068	808	633	1138	545	954	570	398	776	724	949	762	724	573	1299	992	1072	636	716	901	769	841	451	810	871	930	776	576	780	764	WDR70
1570	ENSG00000082074	125	78	961	474	200	489	259	286	335	1380	573	461	220	308	991	269	190	229	364	114	38	169	737	1285	429	251	804	706	405	FYB
1571	ENSG00000082126	5	8	15	8	5	5	4	9	8	13	7	5	8	11	17	63	13	27	27	21	7	3	11	10	3	2	5	9	12	MPP4
1572	ENSG00000082146	169	144	271	146	267	173	212	244	222	295	250	143	188	319	271	299	194	299	258	217	213	215	403	257	225	198	254	174	119	STRADB
1573	ENSG00000082153	12222	3805	10567	5215	5478	5197	3227	7236	10190	12270	11125	2774	10568	6460	8111	3039	1442	1952	2314	8966	9961	11038	7174	5730	8020	9298	12355	8549	6953	BZW1
1574	ENSG00000082175	26	85	86	56	64	31	21	24	19	69	83	51	12	26	38	284	103	302	358	38	15	9	32	85	77	35	25	70	200	PGR
1575	ENSG00000082196	72	187	189	130	203	113	119	179	113	145	238	241	66	624	223	481	404	439	633	107	180	21	146	186	173	79	81	130	359	C1QTNF3
1576	ENSG00000082212	836	1124	1253	643	1418	649	412	637	1060	1736	2052	567	673	1208	1445	584	288	427	604	841	488	707	859	681	1114	677	754	825	753	ME2
1577	ENSG00000082213	761	758	1419	737	931	686	470	935	894	967	811	692	726	1939	1083	565	255	389	449	961	1074	545	893	1017	1104	928	1262	794	921	C5orf22
1578	ENSG00000082258	1845	2110	2676	1389	2373	1700	1359	2080	2370	2540	2616	1715	1758	3253	2960	2505	1189	2236	2442	2777	2122	696	1871	2146	2458	2058	2185	2360	1860	CCNT2
1579	ENSG00000082269	2352	1707	2946	1592	1718	1971	1385	2328	4394	1980	1655	1350	3002	2480	2742	4282	2189	3467	3846	2813	1887	1351	1805	1757	2154	2146	2668	2420	2119	FAM135A
1580	ENSG00000082293	7	0	6	0	2	0	4	5	4	5	1	7	2	0	7	10	11	12	24	8	3	4	8	8	2	1	4	7	3	COL19A1
1581	ENSG00000082397	3492	354	2052	1293	969	734	325	670	1178	2077	1575	571	697	592	1337	1131	775	896	1166	1457	1524	1395	1899	936	716	420	581	1438	805	EPB41L3
1582	ENSG00000082438	2252	969	2335	1283	2779	1598	1052	1606	2913	2524	3601	1248	2424	2166	3225	3402	1236	2774	3182	3094	1758	797	2354	1877	2929	2965	2912	1570	2142	COBLL1
1583	ENSG00000082458	1159	1275	1716	724	1773	906	799	1206	1382	1348	1431	450	919	1485	1513	1043	657	711	904	1277	990	559	640	1394	1407	1343	1199	1149	1091	DLG3
1584	ENSG00000082482	6	148	155	108	77	96	89	141	87	113	118	95	4	24	67	307	59	84	384	8	5	133	54	46	106	44	117	33	436	KCNK2
1585	ENSG00000082497	599	1156	1579	849	1802	993	728	1651	1172	1144	1182	798	538	778	1686	553	353	494	795	957	1008	308	1383	962	1812	1580	1433	1403	1552	SERTAD4
1586	ENSG00000082512	278	266	923	471	866	464	402	348	387	1027	902	790	343	1287	1238	532	354	451	626	589	418	114	684	1025	464	236	211	635	551	TRAF5
1587	ENSG00000082515	652	326	524	239	446	339	238	481	454	468	309	354	390	571	421	308	144	265	274	574	445	633	824	430	529	413	606	423	370	MRPL22
1588	ENSG00000082516	745	889	1137	648	1247	804	439	986	1143	1129	625	622	711	992	766	734	625	727	813	961	392	458	403	441	865	945	1287	925	764	GEMIN5
1589	ENSG00000082556	2	0	9	3	95	4	0	2	5	1	0	6	7	2	15	1	2	2	2	7	4	1	9	2	5	2	2	95	1	OPRK1
1590	ENSG00000082641	7117	5112	8817	5166	13023	5264	3818	7890	8307	8105	8107	2531	6339	6569	9185	2075	2157	1968	2591	7830	6717	3447	5323	3993	10038	6487	7837	13608	7247	NFE2L1
1591	ENSG00000082684	25	115	63	42	103	45	37	72	34	61	35	66	12	65	88	21	13	13	19	47	48	4	31	100	92	18	221	29	133	SEMA5B
1592	ENSG00000082701	2867	3031	4464	2312	6506	1898	1725	2755	3109	3098	4165	1542	2679	4699	5486	1901	978	1464	1964	3591	2673	1717	1548	2735	4280	4143	4374	3153	3393	GSK3B
1593	ENSG00000082781	4745	4002	9459	5142	6629	3307	2801	5426	4728	5229	9172	2706	4323	2404	5707	2482	2570	1905	2305	4878	3681	3716	2274	4151	6409	6967	5188	8319	8192	ITGB5
1594	ENSG00000082805	3504	2476	5194	2598	3661	1073	824	1802	2508	2206	2734	1345	1925	1858	3245	1806	1321	1570	2025	3616	1883	1010	987	1592	2903	2248	1715	2952	3006	ERC1
1595	ENSG00000082898	4534	4630	6877	3481	8616	4289	3236	5584	6489	8552	4813	4429	4376	5878	6115	5422	2042	3827	4480	6631	2782	1408	2943	3579	5072	4550	5522	4758	4029	XPO1
1596	ENSG00000082929	5	2	3	0	0	0	1	1	0	2	0	4	1	0	1	24	14	12	24	5	1	1	2	0	4	2	2	1	3	C4orf6
1597	ENSG00000082996	1281	1423	2378	1288	2173	1103	935	1551	1293	2240	1759	1119	1356	2062	2234	2074	1083	1935	1971	1733	1647	1358	2171	1994	2129	1621	2221	1684	1933	RNF13
1598	ENSG00000083067	4	8	7	6	12	5	4	2	3	6	2	13	7	3	5	67	23	55	85	2	3	1	8	3	4	4	2	6	11	TRPM3
1599	ENSG00000083093	612	614	900	506	973	585	467	770	800	874	1132	563	635	855	690	505	324	420	515	1018	756	275	834	620	834	698	747	677	506	PALB2
1600	ENSG00000083097	1332	1600	2142	1089	1654	1090	764	1206	1386	1070	1597	875	762	1855	1721	3820	2316	3020	3320	1965	1882	207	1068	1527	2065	1420	2766	1533	1483	DOPEY1
1601	ENSG00000083099	965	939	1438	722	963	738	513	995	1125	1075	714	570	782	828	1254	802	398	665	643	1049	871	640	1333	1185	1296	1137	1447	969	779	LYRM2
1602	ENSG00000083123	302	579	429	220	448	337	281	738	365	319	286	326	246	610	427	539	243	405	482	434	340	198	632	960	922	213	2256	348	437	BCKDHB
1603	ENSG00000083168	2242	2787	5002	2452	4089	1452	1451	1798	2664	1845	2671	1550	1561	2110	3177	3461	2539	3030	4549	3558	2322	871	1226	1893	4159	4265	4565	3566	3319	KAT6A
1604	ENSG00000083223	4312	1482	4270	2192	3451	2629	1827	3195	4566	3191	3973	1436	3826	3510	4711	4544	2923	3969	4724	5063	4293	1254	1914	2114	3590	3395	3321	4330	3413	ZCCHC6
1605	ENSG00000083290	772	1136	1439	886	2583	669	596	1004	1017	1017	1584	701	521	897	1235	775	493	644	897	1201	814	363	645	939	1007	446	1403	960	978	ULK2
1606	ENSG00000083307	1969	4541	3039	1364	5058	1816	1183	2834	2959	3652	2926	2025	2172	2631	2996	1860	1377	1413	1730	2997	1402	585	1313	1518	3630	2679	4392	1673	1544	GRHL2
1607	ENSG00000083312	3988	3474	6131	2936	4725	2866	2077	3566	4314	3956	4029	2210	2763	3704	4414	4990	2268	4655	4984	4906	2312	1911	2168	2436	5122	4366	5432	4993	4865	TNPO1
1608	ENSG00000083444	2265	1504	2716	1419	1896	1387	1018	1729	2143	2381	2192	1260	1334	1219	1966	486	333	334	406	1467	675	1295	792	854	1373	1328	1162	1786	1603	PLOD1
1609	ENSG00000083454	2	1	10	8	35	31	24	15	17	61	19	31	8	7	72	3	1	1	3	3	2	5	21	15	3	5	10	8	6	P2RX5
1610	ENSG00000083457	378	291	617	265	523	325	242	420	441	453	497	363	267	612	472	173	112	122	159	467	483	513	569	456	458	272	583	410	297	ITGAE
1611	ENSG00000083520	2018	1623	2781	1483	2840	1651	1070	2075	2286	2992	1985	899	1899	2099	2124	2045	1115	1709	1882	2404	2129	1059	1469	1417	2098	1782	2370	2081	2056	DIS3
1612	ENSG00000083535	275	468	691	336	583	397	266	644	465	561	350	296	427	563	466	1091	526	1013	1146	535	351	233	478	347	511	343	323	424	449	PIBF1
1613	ENSG00000083544	384	946	747	414	804	381	317	519	461	696	433	331	376	721	599	1254	618	1030	1045	606	453	228	515	425	646	320	516	492	480	TDRD3
1614	ENSG00000083622	0	0	0	0	2	1	0	0	0	1	0	0	1	0	0	5	8	6	13	3	4	0	0	0	0	0	0	1	1	AC000111.6
1615	ENSG00000083635	338	341	505	274	508	232	165	375	419	524	247	190	317	435	295	214	109	168	154	427	268	214	248	246	353	354	421	284	358	NUFIP1
1616	ENSG00000083642	759	1187	1866	1028	2365	926	680	1318	1222	1719	1178	1053	770	1540	1419	2300	1074	1850	2256	1402	779	330	711	1386	1319	911	1542	1112	1336	PDS5B
1617	ENSG00000083720	2283	1227	4860	2165	2629	1951	1270	2412	3557	1968	2223	2029	1462	2914	2720	2203	1105	1530	1672	3115	2853	1103	1334	2765	2129	1732	2442	2836	2069	OXCT1
1618	ENSG00000083750	189	501	412	262	485	214	225	302	190	324	386	266	186	435	437	503	397	489	502	335	406	139	350	410	403	247	260	345	279	RRAGB
1619	ENSG00000083782	0	0	4	4	1	0	0	0	1	2	0	0	0	0	1	0	0	2	0	0	0	3	2	1	1	0	0	0	1	EPYC
1620	ENSG00000083799	1548	1553	5053	2736	2853	1730	1658	1927	1975	3273	2263	1570	2282	2294	4336	2938	1667	2830	3341	2475	2156	1349	3143	3781	4663	3052	3893	3302	3435	CYLD
1621	ENSG00000083807	31	126	45	25	264	74	32	89	80	123	38	109	33	81	108	52	45	56	46	50	42	63	98	77	105	66	216	42	41	SLC27A5
1622	ENSG00000083812	355	460	614	257	655	292	176	394	487	659	483	293	300	485	502	218	169	184	191	453	451	200	251	395	411	469	608	438	452	ZNF324
1623	ENSG00000083814	20	92	127	66	108	120	79	149	104	133	66	80	37	105	217	111	102	104	174	40	50	49	107	150	69	23	55	54	72	ZNF671
1624	ENSG00000083817	254	205	212	124	300	164	122	212	352	324	252	79	293	257	242	238	136	189	250	223	248	234	225	293	262	266	221	202	191	ZNF416
1625	ENSG00000083828	147	194	218	114	248	145	109	215	207	341	160	116	226	229	253	466	313	423	604	262	151	124	309	239	284	182	226	260	117	ZNF586
1626	ENSG00000083838	114	374	238	128	394	148	114	207	229	243	254	153	114	270	263	137	101	120	131	199	144	64	146	200	244	195	236	173	152	ZNF446
1627	ENSG00000083842	10	18	9	12	21	10	2	9	28	5	15	5	3	18	20	22	22	25	18	15	9	7	8	16	26	12	24	9	11	ZNF8
1628	ENSG00000083844	214	262	372	183	453	161	144	202	298	267	262	105	155	165	241	880	671	934	930	334	245	75	132	201	437	391	404	383	354	ZNF264
1629	ENSG00000083845	12643	9830	15054	7834	18530	7131	5370	8851	8883	15370	9917	7343	7331	9765	10954	6827	4477	4945	4568	10624	12198	26169	23065	16105	15463	9744	26426	11630	12211	RPS5
1630	ENSG00000083857	13991	4952	12619	7359	8152	3018	2564	5585	4206	5859	8015	3015	3705	5557	6706	10840	6459	8562	9778	14307	14777	2598	4311	3298	19248	3144	8855	13858	12683	FAT1
1631	ENSG00000083896	2150	2266	2961	1648	4336	2050	1429	2895	2694	3492	3257	1770	1830	3084	3174	2727	1635	2532	2635	3287	2322	849	1911	2286	3330	2431	3004	2386	2283	YTHDC1
1632	ENSG00000083937	1780	1258	2740	1393	2070	1392	1141	1853	1998	2145	2467	919	1805	2156	1888	1506	589	1239	1387	1908	2722	2390	2002	1881	2994	1750	2504	2209	2211	CHMP2B
1633	ENSG00000084070	1617	1185	3738	1806	2430	2014	1424	1717	3286	5467	3245	1917	1503	2084	3518	631	654	519	716	1871	1712	2249	1844	3023	2217	1900	3010	2695	1890	SMAP2
1634	ENSG00000084072	1168	655	1538	763	1727	704	462	967	1056	1042	642	1368	1032	2175	1688	458	369	537	722	1523	1485	882	1521	1390	1092	936	1254	860	868	PPIE
1635	ENSG00000084073	2658	2291	4735	2405	3155	2132	1343	2530	3414	3747	3224	1611	2102	2699	3173	1482	646	1104	1177	2822	2059	2495	1683	2054	3205	2688	3872	3452	2667	ZMPSTE24
1636	ENSG00000084090	2797	3019	6188	3285	7514	3531	2580	4558	5059	6428	4657	2833	2714	5906	5447	2405	1509	1906	2110	4280	2797	2581	4192	4507	4264	3997	8132	4977	3364	STARD7
1637	ENSG00000084092	1002	748	916	564	1489	712	507	952	959	1026	911	689	691	937	891	580	344	422	427	897	703	787	959	1027	1388	792	1726	896	803	NOA1
1638	ENSG00000084093	1167	2081	2354	1243	2983	1363	1074	1945	2001	1855	1562	736	1132	1578	1855	2962	1252	2319	2736	1716	1247	608	1020	1559	2151	1620	2132	1838	1592	REST
1639	ENSG00000084110	15786	4951	10386	6049	6888	8851	4266	6968	11314	5518	13624	1991	5582	8881	9857	8805	2346	4323	1702	12527	12511	8532	3477	4824	7892	8591	6964	10731	5130	HAL
1640	ENSG00000084112	1802	1622	4225	2155	2877	1442	979	1455	2287	2653	3108	1725	1499	1673	3023	563	461	547	732	2576	2581	1046	1257	2598	2673	2042	2105	2723	2869	SSH1
1641	ENSG00000084207	22110	8407	16334	8454	14849	7642	5999	8918	15630	15306	17120	20381	22215	25688	14500	3203	2740	1989	2141	17435	14739	26015	20454	10126	15950	12849	11322	11855	10248	GSTP1
1642	ENSG00000084234	12964	7767	22393	11159	14313	7648	6583	10173	12226	15524	12148	9024	8628	8345	11549	4883	4055	4768	4521	10888	8355	5846	4741	7528	14097	11345	13773	11693	10545	APLP2
1643	ENSG00000084444	104	319	408	246	450	289	288	564	342	435	254	151	215	313	326	708	379	494	468	229	150	96	131	290	350	223	741	214	266	KIAA1467
1644	ENSG00000084453	1	448	1	1	4	0	1	1	0	0	2	2	1	2	1	36	5	14	1	3	35	0	5	14	0	0	0	8	2	SLCO1A2
1645	ENSG00000084463	2310	2253	3634	1723	2800	1618	1301	2333	2586	3958	2929	2631	2124	3178	3249	875	583	755	765	2509	1935	1430	2198	2679	3245	2841	3182	2315	2274	WBP11
1646	ENSG00000084623	7116	2731	6247	3000	6358	3061	2074	3960	5089	6134	4053	3153	3535	4291	3941	2089	1351	1352	1346	5330	3585	7588	5562	4107	5030	4468	8262	4294	3905	EIF3I
1647	ENSG00000084628	125	64	124	59	166	30	60	37	178	168	69	78	98	65	131	16	7	5	15	110	104	107	75	62	94	91	50	82	69	NKAIN1
1648	ENSG00000084636	3112	3642	5614	3186	3242	4615	3086	6429	5595	4107	6154	2260	2433	2634	5240	2053	1892	1370	2211	4944	2625	652	1238	1530	2219	2142	3512	4393	5206	COL16A1
1649	ENSG00000084652	2882	3123	4943	2601	8729	3648	2251	4909	4961	5634	4048	2712	2644	4604	6042	1871	1267	1325	1767	3968	2175	1248	1977	2870	4531	2656	6540	3716	2797	TXLNA
1650	ENSG00000084674	121	128	106	98	42	60	27	52	52	31	139	35	54	13	27	1642	70	72	101	234	195	25	17	34	267	219	76	182	71	APOB
1651	ENSG00000084676	2527	2493	4250	1905	3657	1864	1410	2208	3446	2780	3561	1838	2081	2425	2959	2522	1618	2144	2824	2506	2183	993	1750	2676	3795	2278	3472	2233	2948	NCOA1
1652	ENSG00000084693	593	717	872	419	1363	502	420	598	782	933	722	691	645	952	819	503	397	489	526	637	549	501	1005	869	1034	720	1161	534	631	AGBL5
1653	ENSG00000084710	769	98	444	161	91	132	38	80	448	62	281	29	57	68	112	38	34	38	40	398	256	174	51	29	156	218	75	267	285	EFR3B
1654	ENSG00000084731	236	940	504	255	454	184	184	253	263	300	342	419	213	193	307	84	64	62	66	178	151	173	124	548	349	430	394	201	387	KIF3C
1655	ENSG00000084733	13545	5706	18013	8096	11013	8603	6302	12070	15628	15841	11350	6309	19865	11018	12088	4442	1930	3156	3968	12982	10314	9898	8805	7552	11238	11001	10838	10601	10014	RAB10
1656	ENSG00000084734	7	10	6	5	5	11	8	26	10	18	2	14	12	3	0	5	2	2	1	11	1	5	10	43	12	6	15	5	9	GCKR
1657	ENSG00000084754	7082	4202	8286	4515	8803	4516	3194	6682	6533	7143	6931	3973	5456	5723	6425	4097	2942	3374	3228	6629	4290	5655	5399	6049	7491	6002	13690	4895	5428	HADHA
1658	ENSG00000084764	629	370	910	427	894	483	406	638	475	934	1099	601	472	1097	827	218	172	177	210	617	632	336	713	552	848	578	848	502	565	MAPRE3
1659	ENSG00000084774	2057	2687	2401	1320	4406	2619	1318	3295	4626	3445	3143	2471	1653	2514	3869	657	447	540	539	3560	1059	638	810	1236	2415	2289	2555	1737	1752	CAD
1660	ENSG00000085063	8930	5363	9886	5561	4777	4527	3406	5645	5322	10992	5863	2146	5956	3133	6343	7470	4444	5635	6406	4894	6263	17833	7249	7050	9473	6362	22112	7513	8648	CD59
1661	ENSG00000085117	4297	1883	4278	1986	3756	1858	1405	3077	2951	4211	3431	1309	2205	3005	3825	586	399	497	500	3850	1545	3128	1612	3324	4789	3087	7547	3316	2519	CD82
1662	ENSG00000085185	199	342	461	232	449	334	338	532	507	419	325	173	299	328	438	85	76	91	87	416	112	115	99	264	234	405	588	367	398	BCORL1
1663	ENSG00000085224	2176	2924	3778	1851	2742	1483	1563	2255	2188	1995	2947	1862	1456	2235	2894	5964	2663	4566	5606	3062	2268	701	1548	1932	5187	3517	3042	3692	3531	ATRX
1664	ENSG00000085231	1839	969	1590	852	1508	1035	714	1550	1411	1565	1227	1106	1561	1541	1373	822	425	648	757	1730	1384	2360	2167	1310	2020	1343	1960	1629	1328	TAF9
1665	ENSG00000085265	35	56	84	61	47	74	56	42	160	749	125	98	36	78	209	20	6	34	24	28	43	492	165	102	47	5	103	60	102	FCN1
1666	ENSG00000085274	462	493	814	441	918	409	349	521	549	753	629	454	557	672	778	771	293	617	699	674	641	327	556	513	796	775	574	561	606	MYNN
1667	ENSG00000085276	179	112	473	296	253	296	170	201	208	222	286	210	278	159	281	303	201	355	384	138	157	131	132	196	186	386	303	239	382	MECOM
1668	ENSG00000085365	1617	2298	2208	1255	2535	1546	1331	2056	2246	1835	1937	1024	1796	2005	1965	2250	717	1584	1893	1756	1846	1529	1763	1751	2835	2097	4528	2237	2438	SCAMP1
1669	ENSG00000085377	1886	2137	2653	1455	1961	1674	1153	1765	2562	2259	1935	902	1691	1916	2602	980	593	637	859	1644	1543	1852	1310	1558	2273	2007	2661	1927	2075	PREP
1670	ENSG00000085382	358	802	727	353	550	350	299	413	427	554	511	381	387	531	763	1041	511	840	978	452	427	157	506	446	743	437	491	444	570	HACE1
1671	ENSG00000085415	1372	1340	2214	1189	3233	1352	844	1739	1909	2060	2250	1644	1388	2760	1947	839	418	798	735	1921	1578	1262	1111	1178	2078	1736	2450	1550	1419	SEH1L
1672	ENSG00000085433	1327	937	2539	1304	2663	1224	956	1944	2103	1604	1815	559	1162	1761	2043	1767	1168	1483	1667	2055	1698	619	1129	1579	2030	1679	1158	1664	1369	WDR47
1673	ENSG00000085449	1876	1761	2619	1505	2413	1188	1290	1598	1372	2741	2445	966	1049	1512	2544	2093	1042	1793	1853	1291	1546	795	1421	2285	2718	1336	2594	1833	2182	WDFY1
1674	ENSG00000085465	68	198	141	96	189	161	147	239	91	125	189	214	61	210	160	124	174	132	162	226	141	16	112	193	179	135	153	69	129	OVGP1
1675	ENSG00000085491	1119	1096	1897	923	1822	678	599	1021	1135	1705	1271	587	996	849	1186	1109	465	918	1073	1019	1224	1258	805	992	1363	1082	1230	1266	1412	SLC25A24
1676	ENSG00000085511	1141	1907	2076	1045	1348	976	599	1321	1582	1780	1556	1137	970	1493	1924	2122	1373	1614	2165	1647	1418	408	643	1001	1281	1660	1755	1274	1074	MAP3K4
1677	ENSG00000085514	94	74	244	167	100	74	80	73	92	484	160	103	105	131	152	36	57	17	38	84	45	315	282	311	94	45	131	146	183	PILRA
1678	ENSG00000085552	985	3729	942	420	3090	1057	920	2186	2020	1767	2071	1165	1169	6537	2113	336	189	245	221	2202	916	250	468	593	1260	1942	913	939	920	IGSF9
1679	ENSG00000085563	112	64	181	106	232	158	105	123	148	129	188	118	82	96	213	202	49	168	216	133	140	31	64	129	284	195	96	106	284	ABCB1
1680	ENSG00000085644	662	630	941	477	1096	487	363	695	876	1125	1074	460	551	865	670	93	82	96	66	634	560	452	423	540	799	608	883	645	586	ZNF213
1681	ENSG00000085662	877	982	1496	672	1161	462	490	691	602	1199	442	771	847	620	657	278	295	256	259	499	430	713	717	1011	972	711	512	896	729	AKR1B1
1682	ENSG00000085719	3616	3552	7076	3502	8035	3458	2711	4695	4736	5921	5996	2128	2986	5546	4900	4186	2065	3602	3791	4494	3529	2393	3003	2896	6022	5822	5439	5623	4733	CPNE3
1683	ENSG00000085721	920	1034	1984	1000	1286	1100	759	1548	1567	1560	1377	767	1087	1382	1244	817	516	675	766	1596	812	579	882	1078	1568	1318	2109	1116	1041	RRN3
1684	ENSG00000085733	10591	5504	13030	6269	8416	6602	5157	8910	10845	11174	12168	4453	8828	7887	9853	3908	2848	3083	3422	10818	7413	4299	4627	5552	9199	7034	8733	8565	7478	CTTN
1685	ENSG00000085741	27	203	32	28	134	310	70	208	282	358	333	54	83	187	150	41	68	47	55	36	95	178	76	115	964	1154	826	127	170	WNT11
1686	ENSG00000085760	1314	722	1654	873	1608	983	622	1499	1280	1675	1236	948	1144	1558	1523	965	506	725	774	1655	816	671	1139	1028	1506	1538	1328	1018	808	MTIF2
1687	ENSG00000085788	1469	1964	2709	1419	1937	1159	1016	1386	1776	1908	1925	1123	902	1303	2283	1935	1160	1952	2049	1868	1306	729	1371	1318	2514	1905	1815	1667	1747	DDHD2
1688	ENSG00000085831	2213	585	2178	994	1200	1053	509	1087	2089	2289	1714	647	1243	936	1048	423	308	300	447	1817	1302	1315	722	913	1164	1584	753	1293	926	TTC39A
1689	ENSG00000085832	2376	2175	4338	2345	3068	1997	1747	2418	2754	4009	4032	2239	2014	2521	3480	4966	2777	4107	4459	2789	3480	1484	2468	3188	2952	2290	3259	2442	2822	EPS15
1690	ENSG00000085840	319	196	379	139	985	208	113	360	409	520	298	345	143	289	389	152	37	82	83	442	123	74	109	180	227	441	289	222	145	ORC1
1691	ENSG00000085871	568	255	698	404	1269	621	536	879	746	745	483	758	446	911	786	603	484	507	538	965	753	981	1542	1302	1065	546	1533	750	728	MGST2
1692	ENSG00000085872	731	710	1107	559	1454	736	557	1110	1257	1595	1215	749	644	992	1232	63	54	55	57	1003	554	318	343	654	969	935	1383	829	718	CHERP
1693	ENSG00000085978	938	728	1122	651	1193	941	798	1323	1365	1727	936	676	718	1383	1524	1016	769	869	1014	1299	966	411	790	1046	987	852	1303	1061	774	ATG16L1
1694	ENSG00000085982	1025	1016	1463	930	2297	766	768	1403	1347	1519	669	513	989	1321	1601	1553	1063	1244	1592	1847	1083	418	1101	1034	1634	760	944	1278	897	USP40
1695	ENSG00000085998	1245	1136	1586	816	2481	995	890	1354	1335	2089	1353	892	905	1915	1799	441	337	460	431	1614	1377	1091	1570	1238	1612	1143	1590	1364	1283	POMGNT1
1696	ENSG00000085999	179	159	225	72	741	171	118	221	319	464	174	390	164	639	320	105	31	37	57	282	131	61	86	128	146	248	151	171	110	RAD54L
1697	ENSG00000086015	1246	1119	1616	705	2186	1041	653	1307	1574	1786	1808	1381	1140	1468	1961	529	409	391	558	1338	771	403	593	978	1008	1171	1323	1247	1095	MAST2
1698	ENSG00000086061	2187	2785	3590	1756	3270	2736	1622	3947	3388	4865	1806	1612	2225	1973	3824	2030	908	1403	1565	2893	2051	2875	2452	2773	2842	2618	8535	3207	2972	DNAJA1
1699	ENSG00000086062	3911	3209	5781	3313	5433	2580	1469	3338	3426	6225	4713	2748	3997	2800	6225	614	409	474	591	2609	2412	2525	1448	2074	4121	3849	5299	4303	5640	B4GALT1
1700	ENSG00000086065	1835	1388	1914	894	2044	1423	908	1795	1846	2321	1696	1378	1733	1545	2498	1483	660	921	1145	1698	2041	2017	2376	1641	1801	1925	1863	1899	1762	CHMP5
1701	ENSG00000086102	1819	1674	2290	1285	2476	1889	1317	2650	2711	2935	2226	1812	1265	1901	3106	1756	1391	1457	1699	2989	1988	763	1352	1707	2214	2010	2481	1952	1831	NFX1
1702	ENSG00000086159	1	5	1	2	0	4	1	0	6	6	2	1	1	1	5	5	8	5	2	12	2	0	2	1	1	2	3	1	6	AQP6
1703	ENSG00000086189	1071	958	1543	853	1371	928	669	1172	1155	1433	823	973	827	1310	1216	757	288	672	708	1160	781	924	1200	1066	1353	1255	1312	1175	1064	DIMT1
1704	ENSG00000086200	909	673	979	533	1214	626	424	919	926	1098	580	612	562	973	855	872	364	714	758	990	564	512	518	492	958	915	930	1001	886	IPO11
1705	ENSG00000086205	136	39	113	68	87	92	65	121	84	104	151	29	139	60	49	39	46	83	72	227	288	69	358	85	237	76	22	48	131	FOLH1
1706	ENSG00000086232	3194	3058	3767	2169	6219	2624	2346	3801	4478	5711	4298	4011	2615	4177	4384	1130	829	986	1072	3742	3204	2446	3676	3363	4902	4079	4849	3168	3260	EIF2AK1
1707	ENSG00000086288	5	1	19	3	5	24	11	11	13	26	6	7	7	10	28	9	10	8	14	6	1	7	21	21	7	4	2	19	7	NME8
1708	ENSG00000086289	104	104	224	148	213	81	53	60	88	135	90	82	55	72	120	109	107	106	153	76	57	103	94	85	92	29	80	136	131	EPDR1
1709	ENSG00000086300	175	210	836	386	551	324	240	205	466	870	301	225	313	389	713	117	77	106	198	125	111	729	435	524	200	334	237	497	355	SNX10
1710	ENSG00000086475	1405	1585	1988	940	2036	1113	780	1529	1639	2017	1854	1440	864	1485	1566	809	428	671	720	1552	1188	1072	1480	1501	1769	1401	1965	1321	1363	SEPHS1
1711	ENSG00000086504	1682	740	1432	702	1470	633	437	1167	1022	1628	1377	532	1008	1088	905	215	146	134	171	1077	911	1363	1365	1174	1307	972	1807	899	940	MRPL28
1712	ENSG00000086506	0	0	1	1	1	2	0	3	3	0	2	0	1	0	0	0	0	0	0	1	0	1	0	0	0	1	2	1	0	HBQ1
1713	ENSG00000086544	1999	1314	2375	1110	1788	1374	1341	1834	2292	2482	2342	817	2287	2468	2512	544	415	416	570	2386	3075	1663	1248	1432	2469	2551	3491	1573	1628	ITPKC
1714	ENSG00000086548	1607	197	859	608	168	325	187	265	930	1961	217	54	1571	76	475	149	295	251	362	416	394	1307	502	76	193	732	72	559	247	CEACAM6
1715	ENSG00000086570	10007	5442	11256	6012	18682	4953	4896	6990	9057	6382	7552	4039	5117	7550	10601	7343	5834	7437	11044	14174	7284	1465	4234	4567	15527	9515	10326	14539	7873	FAT2
1716	ENSG00000086589	1267	1401	1723	967	1922	1184	798	1695	1578	1871	1340	1172	1262	1901	1850	773	580	647	706	1482	922	1153	1431	1172	1810	1343	1435	1293	1214	RBM22
1717	ENSG00000086598	7069	4512	8525	4490	7104	4922	3254	5943	6986	9144	6600	4160	5515	6768	7533	3991	2031	3029	3576	5779	5577	7943	6930	6780	7087	6155	10793	6153	6359	TMED2
1718	ENSG00000086619	109	486	356	185	391	247	211	266	170	384	269	215	159	211	404	714	276	583	649	173	204	92	312	470	295	135	409	317	285	ERO1LB
1719	ENSG00000086666	3256	1662	3659	1696	1951	1997	1243	1886	3244	2312	2512	1246	2255	2449	3152	2287	899	1628	1664	3277	3968	2667	2820	2228	3530	3038	3035	2482	2140	ZFAND6
1720	ENSG00000086696	25	125	29	34	50	451	164	386	137	108	14	18	79	48	68	62	17	21	56	35	30	605	297	622	619	168	4452	31	156	HSD17B2
1721	ENSG00000086712	987	586	874	505	1610	552	472	826	839	989	611	761	654	700	735	634	339	549	458	1236	542	277	484	649	856	904	1752	918	640	TXLNG
1722	ENSG00000086717	20	7	24	17	9	14	8	21	14	21	7	6	18	11	12	27	6	22	21	11	11	9	26	13	22	13	8	13	25	PPEF1
1723	ENSG00000086730	283	113	477	257	191	293	195	193	483	635	319	142	161	196	449	82	90	88	108	242	284	298	327	265	186	125	231	265	211	LAT2
1724	ENSG00000086758	9322	8860	14886	7288	16423	6018	4219	8406	9766	9261	9611	5237	6310	9344	12687	8201	5363	6571	9756	12979	6070	3380	3370	5973	13147	10642	12040	12128	10417	HUWE1
1725	ENSG00000086827	988	779	1488	761	1145	776	608	1089	1358	1185	934	982	938	1184	1326	1156	625	813	872	1139	863	592	744	708	1089	976	1193	1011	879	ZW10
1726	ENSG00000086848	231	284	422	177	312	180	195	249	291	335	347	303	182	333	279	292	161	251	280	287	264	116	223	221	265	160	294	250	242	ALG9
1727	ENSG00000086967	2	5	18	9	19	12	9	15	24	29	16	13	7	22	66	2	2	2	1	5	6	5	15	36	21	11	16	12	16	MYBPC2
1728	ENSG00000086991	110	126	307	150	55	48	23	44	82	58	119	38	92	57	74	68	96	43	85	49	50	63	74	42	136	93	32	118	216	NOX4
1729	ENSG00000087008	1503	578	1499	664	1081	671	376	819	843	1200	1916	768	951	1775	1197	501	325	363	356	873	1017	681	618	722	1537	868	1833	889	806	ACOX3
1730	ENSG00000087053	1745	1284	2078	1082	1404	1078	666	1542	1609	1662	1559	810	1419	1298	1618	1006	535	773	942	1712	1305	1362	1045	1151	1621	1096	1259	1291	1474	MTMR2
1731	ENSG00000087074	2186	1481	2891	1451	1688	1350	1479	1445	2345	2345	2502	1417	2398	1791	2644	926	748	600	572	4125	2557	1800	1730	1675	3223	2451	1551	2175	2728	PPP1R15A
1732	ENSG00000087076	50	46	57	50	57	51	58	38	33	46	54	50	29	42	36	28	18	20	20	41	32	53	92	126	75	27	33	51	70	HSD17B14
1733	ENSG00000087077	3382	1937	3257	1652	2928	1828	1244	2447	3018	3621	3481	2339	2766	3328	3309	614	385	442	446	3618	2228	1847	2105	1599	2457	2518	2463	2409	2639	TRIP6
1734	ENSG00000087085	7	11	72	42	44	43	41	24	19	198	57	35	17	81	114	7	5	8	2	24	40	16	61	116	21	7	12	65	32	ACHE
1735	ENSG00000087086	10457	12630	26675	15761	19815	9077	10503	5676	9144	24228	17405	16219	18819	12398	15064	6708	8654	7034	8589	11518	6853	43633	46782	26424	14674	11371	11334	17478	25190	FTL
1736	ENSG00000087087	2795	2418	3059	1505	3927	3150	2452	4740	5100	6479	5028	3586	2284	4428	4941	745	491	606	681	4786	2793	994	1562	2496	2651	2975	3471	2604	2625	SRRT
1737	ENSG00000087088	1005	837	1529	787	1183	627	581	681	986	1730	1289	820	921	833	999	137	90	84	103	1018	651	955	1101	1123	908	950	767	1069	963	BAX
1738	ENSG00000087095	373	429	662	308	439	351	292	415	407	582	364	335	417	327	506	582	320	488	589	573	389	211	488	506	480	454	537	550	458	NLK
1739	ENSG00000087111	1541	1685	2643	1322	2865	1090	973	1594	1743	2616	1906	1841	1420	1627	2006	469	417	429	396	1857	1336	1152	1356	1702	2210	1305	2440	1600	1563	PIGS
1740	ENSG00000087116	2159	1242	5298	2815	918	1032	680	673	1345	1921	2941	1300	964	999	1968	482	724	371	594	1063	231	506	508	758	893	826	898	1951	3082	ADAMTS2
1741	ENSG00000087128	103	200	141	76	101	340	173	638	89	128	447	48	230	100	77	465	55	136	153	115	243	304	770	1101	1301	586	5297	130	356	TMPRSS11E
1742	ENSG00000087152	4405	2524	4828	2520	3197	2189	1669	2949	3852	3746	4029	1499	2474	3499	3171	815	627	622	660	3808	3059	1511	1520	2617	3347	3345	3518	3277	3244	ATXN7L3
1743	ENSG00000087157	1016	838	984	550	859	637	389	695	820	1202	751	546	771	657	966	369	259	289	391	889	884	383	686	754	928	660	1137	760	694	PGS1
1744	ENSG00000087191	3297	1927	4192	1928	2784	2148	1319	2961	2867	3162	2988	1991	2742	2431	3166	828	624	649	593	3307	2587	3170	3410	2381	2966	2455	3146	2721	2350	PSMC5
1745	ENSG00000087206	647	661	871	494	986	537	430	690	737	870	704	564	538	848	1063	634	492	580	659	807	631	397	826	585	918	584	745	701	706	UIMC1
1746	ENSG00000087237	40	15	31	28	23	22	9	12	16	54	22	20	11	20	33	20	19	13	22	10	4	35	44	42	22	12	13	25	13	CETP
1747	ENSG00000087245	8546	8196	32848	19901	4738	9346	4838	3931	8252	18982	20701	7397	4679	3507	9410	3466	3232	2672	2569	3188	771	7952	2311	3317	12883	3534	3960	10030	29212	MMP2
1748	ENSG00000087250	0	1	1	0	4	0	2	0	1	0	0	2	0	0	0	4	2	0	0	1	0	1	3	3	0	0	0	0	1	MT3
1749	ENSG00000087253	1280	2087	2184	1148	1514	1132	1103	1500	1488	1368	1247	707	932	818	1343	1009	632	724	1119	1215	1430	842	964	933	1702	1283	1071	1416	1814	LPCAT2
1750	ENSG00000087258	74	130	446	204	1027	175	117	167	166	1713	206	632	65	4982	239	37	9	19	31	110	30	56	81	198	121	60	90	244	147	GNAO1
1751	ENSG00000087263	1224	736	1796	900	1295	834	636	1018	1385	1660	742	528	848	831	1180	682	399	613	640	1261	802	880	731	769	1192	799	1322	1082	1009	OGFOD1
1752	ENSG00000087266	4625	4793	4652	2835	7430	3393	3486	5138	4495	8149	6960	3642	2624	4793	7202	2595	2387	2677	3000	5296	2713	1064	3842	4579	5490	3464	4213	4945	4242	SH3BP2
1753	ENSG00000087269	1636	1175	2324	1130	2013	1359	819	1991	2354	2646	1820	1310	1467	1885	2030	556	471	481	524	2049	1009	683	963	1291	1752	1434	2384	1597	1381	NOP14
1754	ENSG00000087274	5829	5882	7414	4133	6895	4010	3017	5805	5688	7626	7783	3290	4146	4791	7197	2595	1910	2302	2537	5532	3699	2797	3211	4736	7425	4363	5935	5729	5418	ADD1
1755	ENSG00000087299	311	255	437	288	703	255	184	378	441	380	302	276	201	521	479	420	235	312	252	601	316	150	145	322	621	379	707	422	326	L2HGDH
1756	ENSG00000087301	129	825	451	250	903	239	203	374	270	421	392	481	209	643	441	668	282	493	613	359	233	105	218	365	514	262	375	366	322	TXNDC16
1757	ENSG00000087302	3107	1912	3067	1578	3170	1844	1203	2383	2795	2996	2227	2460	2529	2547	2745	1627	818	1189	1275	2584	2877	3488	2880	2589	3133	2286	3594	2604	2357	C14orf166
1758	ENSG00000087303	688	561	1697	867	580	796	313	468	1105	999	821	466	295	389	889	516	292	429	530	314	121	300	195	221	509	334	375	529	1026	NID2
1759	ENSG00000087338	528	1198	1079	636	1653	687	637	984	986	961	863	683	611	1075	843	791	299	647	648	1039	669	376	681	816	948	771	1000	847	853	GMCL1
1760	ENSG00000087365	5156	5073	8005	4137	7771	3820	2559	5314	5420	7873	6221	5916	4562	6385	7336	1565	1239	1319	1253	5958	3624	3207	3280	4477	6255	4249	5722	4734	4612	SF3B2
1761	ENSG00000087448	940	1405	1753	1006	1303	795	760	1250	1173	1482	1078	814	771	1148	1499	1020	548	930	915	1457	985	475	643	1059	1247	1007	1558	1236	1425	KLHL42
1762	ENSG00000087460	15636	22847	24563	12670	22650	9069	7686	11766	12540	15929	19049	12018	11444	8413	16315	3242	2335	2846	3010	12987	9317	14237	12880	11994	14981	11931	14489	13178	11894	GNAS
1763	ENSG00000087470	3290	2422	4036	2119	3051	2529	1895	2927	3105	4106	2817	1746	2207	3433	3979	2826	1300	2185	2540	3557	3002	1576	2286	2034	3156	2434	3459	3022	2728	DNM1L
1764	ENSG00000087494	1279	91	1109	632	33	88	132	103	205	209	327	17	890	52	205	29	5	15	20	774	1490	1000	77	44	587	531	17	552	732	PTHLH
1765	ENSG00000087495	18	69	56	38	25	17	13	15	26	37	53	16	11	26	35	45	28	44	64	19	23	10	16	17	22	17	8	15	61	PHACTR3
1766	ENSG00000087502	1067	734	1144	654	887	762	533	1028	964	1288	877	851	1155	992	1253	1905	553	1499	1584	1064	1167	1121	1202	1001	1200	1181	1411	1181	896	ERGIC2
1767	ENSG00000087510	2806	2751	4165	1815	6881	2678	2455	4262	4189	4573	7558	1702	2876	4639	5571	1191	768	907	1086	4146	2891	1475	1913	2742	5980	3364	7013	2910	2557	TFAP2C
1768	ENSG00000087586	476	247	471	226	1902	275	179	413	521	768	428	322	480	719	569	159	68	97	91	554	123	211	638	378	598	621	484	490	110	AURKA
1769	ENSG00000087589	57	14	132	68	35	64	29	49	39	166	80	53	21	53	99	25	45	15	49	20	9	84	74	136	23	8	44	72	86	CASS4
1770	ENSG00000087842	157	245	221	136	567	240	241	381	253	229	231	188	341	307	305	310	151	172	195	245	345	370	610	457	548	339	832	447	283	PIR
1771	ENSG00000087884	34	50	73	39	76	35	26	50	28	43	45	65	41	105	56	110	77	105	119	55	59	67	91	57	92	50	60	62	47	AAMDC
1772	ENSG00000087903	296	478	461	227	667	259	145	324	259	668	724	470	266	766	523	198	208	155	200	560	1206	161	97	209	329	350	212	348	478	RFX2
1773	ENSG00000087916	2421	650	1890	791	453	1692	681	1354	2889	1983	496	178	2965	2405	2645	1073	187	380	638	723	1636	3410	2153	855	1679	1951	6241	660	1228	SLC6A14
1774	ENSG00000087995	395	321	514	264	449	259	237	410	444	387	330	262	339	322	339	289	183	230	264	456	305	327	372	270	389	378	568	404	340	METTL2A
1775	ENSG00000088002	8327	2439	8108	3113	3333	3742	2344	4354	8577	6202	10784	2386	6069	5663	4328	640	304	247	253	8644	5344	6943	3518	3468	5505	7392	8614	4042	4694	SULT2B1
1776	ENSG00000088035	428	526	558	328	821	487	331	603	546	581	524	492	373	765	782	749	267	646	641	610	437	362	572	507	743	430	810	495	495	ALG6
1777	ENSG00000088038	1154	1071	1666	788	1965	1216	854	1797	1929	2374	1925	1189	1221	1810	2183	159	158	181	183	1705	926	719	876	1281	1385	1338	1639	1205	1106	CNOT3
1778	ENSG00000088053	17	9	20	8	24	71	37	47	76	25	18	8	34	34	51	26	19	5	25	105	34	7	25	16	39	29	28	25	13	GP6
1779	ENSG00000088179	615	814	992	490	843	470	371	599	547	708	969	533	542	720	1005	2027	690	1571	1748	975	620	186	728	758	828	546	873	877	948	PTPN4
1780	ENSG00000088205	3348	2655	3960	2068	3670	2326	1561	3142	3484	4402	3171	2942	2608	3501	3850	2054	1146	1734	1726	3666	2575	1849	3003	2807	4115	4637	3991	3538	2831	DDX18
1781	ENSG00000088247	4940	4205	6516	3200	6606	4405	2728	6152	7285	9224	6421	4916	4099	6100	6689	427	275	342	348	5143	3409	2033	2378	3834	5577	5629	6114	4198	3902	KHSRP
1782	ENSG00000088256	1844	1367	2303	1230	2653	1592	1253	2118	2940	3292	2408	1331	1342	2062	2233	289	295	258	266	1894	1787	715	1009	1475	2048	1088	2328	1647	1750	GNA11
1783	ENSG00000088280	1858	2559	2279	1240	2214	1954	1569	2186	3113	2390	3388	1322	1228	2203	3750	1397	1261	1015	1322	1931	2226	2024	1172	1513	2431	1747	1907	1884	2041	ASAP3
1784	ENSG00000088298	425	460	660	366	649	376	377	442	541	784	544	434	488	728	701	306	251	248	250	470	391	450	669	548	495	437	527	529	421	EDEM2
1785	ENSG00000088305	661	380	459	281	1150	323	221	327	463	847	2274	313	198	548	598	164	83	112	135	616	842	182	160	249	1202	879	336	568	398	DNMT3B
1786	ENSG00000088320	18	15	35	25	19	32	20	20	13	75	27	38	16	21	29	14	10	18	19	10	5	17	19	33	26	1	20	18	24	REM1
1787	ENSG00000088325	1792	1110	1740	842	6230	935	626	1321	1900	2561	1851	1566	1425	2578	2421	539	230	290	362	1782	892	651	1161	1035	1695	1936	1265	1584	657	TPX2
1788	ENSG00000088340	16	99	45	15	46	430	249	352	104	45	214	136	96	124	1059	41	34	32	26	62	13	21	181	275	147	36	276	62	42	FER1L4
1789	ENSG00000088356	402	370	499	256	972	347	278	397	461	664	459	302	368	407	470	126	108	90	94	380	400	362	524	414	440	630	765	487	251	PDRG1
1790	ENSG00000088367	922	1503	1142	677	1236	1118	364	919	2058	1399	1466	505	1147	1070	1064	208	195	220	291	590	341	279	1836	522	1398	1482	1560	582	905	EPB41L1
1791	ENSG00000088386	2056	1440	1776	893	1686	3866	2022	4403	5797	2530	3982	979	1945	2349	2484	1917	539	738	1136	3102	3558	1801	1410	3457	5075	3450	14199	1400	2690	SLC15A1
1792	ENSG00000088387	5499	4202	7309	3897	6289	3787	3233	4429	6124	4870	7432	2718	4117	4848	7250	5155	3948	4618	6795	6030	6074	2302	2563	5022	9194	7287	7543	5271	6266	DOCK9
1793	ENSG00000088448	1188	2291	2818	1481	2901	1524	1177	1649	1522	2163	1793	1394	1129	2034	2316	2522	1489	2228	2249	1603	1535	496	1684	1672	1543	1084	1130	1874	1945	ANKRD10
1794	ENSG00000088451	230	419	417	252	508	291	241	349	390	539	275	273	255	454	398	375	160	272	281	341	270	175	388	374	216	299	375	299	246	TGDS
1795	ENSG00000088538	433	433	224	145	417	358	279	490	671	283	295	253	160	177	394	322	197	272	418	647	475	63	212	198	534	181	213	230	318	DOCK3
1796	ENSG00000088543	58	155	174	93	169	94	65	164	79	128	106	76	53	51	163	71	72	80	91	101	27	35	107	142	101	42	129	91	145	C3orf18
1797	ENSG00000088682	911	563	1174	565	972	803	561	1260	1081	1129	675	674	786	700	1027	474	388	407	366	1224	624	699	1488	1151	1200	627	2162	837	636	COQ9
1798	ENSG00000088726	6513	1004	4539	2186	1612	2398	1481	2496	5121	2828	3857	935	3526	3652	2763	973	582	636	735	4764	5050	4843	3199	1761	3424	3099	3885	2249	2071	TMEM40
1799	ENSG00000088727	162	139	230	102	229	140	115	142	226	208	194	80	98	254	192	167	93	81	108	300	205	160	273	136	264	144	266	141	173	KIF9
1800	ENSG00000088756	219	986	379	195	508	275	220	368	232	289	298	553	70	305	315	654	109	303	435	92	102	277	277	588	824	367	237	253	675	ARHGAP28
1801	ENSG00000088766	699	716	1177	649	983	568	491	797	824	1203	826	671	778	1678	1175	597	306	539	606	822	809	1025	967	722	951	741	1853	794	723	CRLS1
1802	ENSG00000088782	0	0	0	0	0	0	0	0	0	0	0	0	0	0	0	0	0	0	0	0	0	0	0	0	0	0	0	0	0	DEFB127
1803	ENSG00000088808	1801	1368	2274	1096	2933	1509	1101	1930	2593	1881	3103	885	1345	2212	1896	809	465	560	669	1867	1983	757	728	1285	2580	2184	3794	1452	1384	PPP1R13B
1804	ENSG00000088812	2317	2943	4309	2378	3501	1951	1852	2747	2930	3335	5208	1325	1806	2489	3128	1695	1121	1587	2064	3025	1994	1011	1067	2124	4839	3556	4840	3289	3691	ATRN
1805	ENSG00000088826	2813	833	2489	1169	841	1213	510	1143	2768	880	2273	302	1008	1217	1392	238	117	117	68	2023	2456	2168	475	701	1888	2393	2796	1619	1089	SMOX
1806	ENSG00000088827	230	138	591	272	358	602	299	271	338	1868	551	544	250	277	997	275	339	195	184	415	58	91	461	831	293	64	258	330	393	SIGLEC1
1807	ENSG00000088832	8743	4448	9659	5386	7971	4434	3179	5377	6967	8259	7048	2700	5850	4705	6628	1231	679	970	1247	4735	3443	8625	8721	5393	6896	6283	9076	6325	5109	FKBP1A
1808	ENSG00000088833	2646	1293	3012	1485	2878	1149	945	1743	2098	2868	3024	1348	1827	2189	2584	905	627	738	822	2539	2025	2023	2246	1669	3293	2033	3009	1990	2028	NSFL1C
1809	ENSG00000088836	488	614	633	274	348	865	470	858	1574	1102	3096	121	466	1009	1091	65	80	93	77	765	1080	172	441	444	749	862	772	377	436	SLC4A11
1810	ENSG00000088854	662	940	1139	674	887	743	598	844	1053	1175	1605	486	700	933	1018	906	798	831	1127	1080	1066	200	597	919	877	823	994	859	1081	C20orf194
1811	ENSG00000088876	210	296	359	206	406	307	301	365	405	469	424	267	295	383	480	312	266	314	303	493	391	115	239	287	278	409	407	353	285	ZNF343
1812	ENSG00000088881	120	132	165	93	383	203	73	349	213	270	426	192	164	252	283	20	31	19	31	488	80	92	91	167	234	264	101	251	204	EBF4
1813	ENSG00000088882	524	542	1412	698	350	1081	664	548	1071	1236	2340	1299	603	505	1617	87	10	110	81	231	101	1083	243	374	813	599	467	569	3105	CPXM1
1814	ENSG00000088888	1320	1058	2004	965	2020	687	372	766	1348	1023	1100	424	707	1470	1673	591	505	587	640	1515	861	453	784	1078	1920	1235	2412	1736	1268	MAVS
1815	ENSG00000088899	177	312	171	91	299	137	256	277	168	219	545	194	147	213	254	53	44	50	51	198	197	49	65	215	277	173	217	148	232	PROSAPIP1
1816	ENSG00000088926	0	0	0	0	1	0	1	1	1	0	0	1	0	0	1	2	1	2	4	0	0	0	2	0	0	0	0	0	1	F11
1817	ENSG00000088930	2868	2706	5138	2539	3703	2279	1513	2630	3209	5084	4078	2779	2808	3061	3754	2303	1433	1822	1947	3014	2541	2047	2817	2819	3896	3331	3867	3089	2907	XRN2
1818	ENSG00000088970	455	544	505	308	444	398	335	732	468	575	926	495	979	566	519	471	412	399	586	601	399	737	1450	612	810	1090	506	382	519	PLK1S1
1819	ENSG00000088986	19437	5324	19236	8704	9060	6761	4466	8204	12748	9760	12725	4718	11282	9674	10697	3702	2110	2532	2770	13829	13241	16043	9859	7477	9408	7892	9174	10893	9976	DYNLL1
1820	ENSG00000088992	27	27	84	47	47	27	15	20	43	82	40	33	18	34	51	45	65	54	37	24	18	115	111	64	32	16	52	28	69	TESC
1821	ENSG00000089006	2351	1863	3188	1746	2537	1780	1223	2162	2424	3317	2812	1897	1939	2060	2796	1589	938	1271	1381	2517	1561	1698	2558	2037	2177	2085	3686	2013	1764	SNX5
1822	ENSG00000089009	24858	14515	24529	13384	20633	13722	10396	18043	16547	23383	15774	14713	16478	20167	19740	13590	9032	9920	10528	17701	23159	38779	39387	27996	25440	18967	43040	18875	19574	RPL6
1823	ENSG00000089012	9	6	203	77	27	53	58	25	18	182	93	75	46	56	197	5	8	6	6	13	0	45	184	242	39	17	13	129	42	SIRPG
1824	ENSG00000089022	763	734	1067	588	991	535	492	773	828	1147	854	770	528	1049	977	771	544	733	876	947	805	388	699	1000	1044	932	1031	728	768	MAPKAPK5
1825	ENSG00000089041	288	275	271	141	556	371	269	447	477	634	550	230	194	506	651	775	479	393	529	554	285	48	433	411	497	154	268	422	341	P2RX7
1826	ENSG00000089048	744	648	925	478	734	674	440	892	947	988	783	549	685	799	924	997	477	897	840	1045	731	266	400	525	774	827	1031	858	699	ESF1
1827	ENSG00000089050	1026	1008	2047	1160	1474	845	791	1270	1030	1664	1294	747	703	1107	1411	899	455	886	940	1447	1209	665	1160	1059	1552	1442	1521	1290	1637	RBBP9
1828	ENSG00000089053	4862	4342	6848	3367	5916	4080	3023	5278	5587	7052	6036	5869	3751	9331	8043	5035	2860	3938	4572	6011	4661	2932	5034	5429	5889	4526	4932	4235	4449	ANAPC5
1829	ENSG00000089057	1909	1714	2234	1254	2784	2395	1102	1667	3662	2491	2426	1387	1121	1924	2714	805	610	804	943	2286	1344	665	4478	1699	2387	1487	2441	1742	1906	SLC23A2
1830	ENSG00000089060	1091	701	1850	914	1078	906	693	1057	1360	2086	1610	617	1194	1909	2009	446	366	369	460	1409	1277	560	857	1160	1333	994	1147	1154	1196	SLC24A6
1831	ENSG00000089063	1500	1163	1479	824	1384	849	650	873	923	1647	1718	965	1574	1371	1722	739	381	487	664	1020	1241	1975	2144	1333	1404	1156	729	1344	1188	TMEM230
1832	ENSG00000089091	80	172	150	88	102	132	109	191	131	141	123	109	81	202	175	103	84	118	131	106	115	23	120	127	124	169	149	70	93	DZANK1
1833	ENSG00000089094	1906	1412	2195	1100	2112	1297	914	1436	1810	3143	2511	1375	1047	2294	2493	720	403	487	568	1887	1454	851	1081	1744	2005	1431	1857	1594	1577	KDM2B
1834	ENSG00000089101	13	14	23	27	48	11	5	9	5	5	10	30	8	48	36	87	59	29	48	37	27	4	38	22	29	8	10	22	25	C20orf26
1835	ENSG00000089116	10	0	5	0	0	1	2	1	0	4	0	4	8	1	1	0	0	0	1	8	14	3	2	21	2	8	2	5	4	LHX5
1836	ENSG00000089123	276	349	460	272	390	198	159	305	296	439	365	323	301	392	349	461	235	366	426	424	348	161	357	287	446	364	303	266	318	TASP1
1837	ENSG00000089127	978	301	1308	487	2779	993	530	1381	912	1945	601	1567	1438	771	3455	232	149	126	343	1910	511	707	1206	2259	847	347	865	1330	872	OAS1
1838	ENSG00000089154	4694	5674	6183	3219	6643	3792	2340	4737	5579	6004	5742	4212	3270	6707	7693	1962	1346	1713	2029	7528	3590	1538	1702	3555	5476	3834	7119	4350	4151	GCN1L1
1839	ENSG00000089157	63303	50677	66954	36949	54765	32970	27605	41520	42722	57541	45525	40832	38515	66669	51756	29883	16324	21491	19539	45209	65370	108142	93243	66521	81054	49760	114740	47279	52514	RPLP0
1840	ENSG00000089159	4457	2191	3254	1758	2244	1753	1043	2285	2412	3865	3307	1086	2241	1843	4148	386	336	303	320	3095	3727	2385	1680	1498	3415	2498	1938	2928	3009	PXN
1841	ENSG00000089163	5	27	25	11	39	26	20	32	30	18	12	20	17	36	18	22	21	22	18	31	11	20	36	33	21	20	34	20	17	SIRT4
1842	ENSG00000089169	0	0	2	1	7	9	1	2	5	1	1	6	3	1	7	0	1	2	0	1	1	0	0	3	0	0	3	2	0	RPH3A
1843	ENSG00000089177	1021	772	1602	818	1369	755	780	1239	1185	1069	1262	710	1033	931	1381	1394	987	1095	1592	1261	981	435	507	728	1516	894	1203	1188	1061	KIF16B
1844	ENSG00000089195	1281	670	1820	887	1051	814	520	1121	1120	1651	1098	1221	939	1198	1228	447	186	308	344	1504	1070	981	864	1182	1164	1429	2728	1061	1011	TRMT6
1845	ENSG00000089199	11	8	20	12	4	9	56	14	11	26	1	20	2	1	46	0	2	1	0	7	5	42	8	11	12	13	13	4	9	CHGB
1846	ENSG00000089220	5197	4746	8779	4792	7522	4054	3439	6231	5160	6277	4318	4148	4104	6439	5643	3556	2348	3522	2740	5391	5102	5801	7852	9365	9960	4552	16406	5029	5926	PEBP1
1847	ENSG00000089225	13	20	37	29	173	0	2	1	1	80	74	55	51	31	47	27	59	70	33	27	18	0	2	1	0	0	1	52	108	TBX5
1848	ENSG00000089234	780	783	1356	728	1025	746	590	1004	1149	1308	1098	608	708	1324	1297	807	511	673	821	997	950	607	822	1042	1167	907	1381	836	776	BRAP
1849	ENSG00000089248	1867	1567	2726	1493	3043	1738	1340	1996	2121	2831	2224	1514	1325	2930	2778	1410	1085	1202	1179	2097	1748	2316	3237	3148	2373	1394	3972	2124	1674	ERP29
1850	ENSG00000089250	797	309	735	404	494	100	144	274	333	132	562	209	540	260	695	396	351	419	370	1896	518	25	47	164	717	322	388	757	474	NOS1
1851	ENSG00000089280	7251	6771	7774	3689	8962	8525	5785	10215	12135	15409	12432	6440	5353	10294	12557	1317	906	1288	1664	11039	5977	3241	4444	7241	7574	5596	7495	5676	6551	FUS
1852	ENSG00000089289	940	669	1246	679	1143	677	603	855	688	951	778	590	715	878	1020	948	532	583	650	848	934	1212	1497	1330	1353	724	1859	978	904	IGBP1
1853	ENSG00000089327	1855	585	2318	1138	2056	948	676	868	1128	3807	1429	1272	930	694	2112	205	224	181	191	1312	508	2515	1451	1908	969	1030	652	1624	1204	FXYD5
1854	ENSG00000089335	277	867	730	355	1114	668	737	903	804	938	643	529	477	1154	1138	1122	608	1203	1187	829	401	147	669	621	470	498	667	625	390	ZNF302
1855	ENSG00000089351	703	785	1252	703	946	671	632	656	760	2055	1051	593	575	552	1225	137	129	134	149	504	452	879	746	1066	712	641	914	851	776	GRAMD1A
1856	ENSG00000089356	7172	2234	6453	3320	8209	3445	2804	4395	4989	5384	5071	3634	6741	9087	6444	1574	1346	1195	1325	6457	9579	7834	24966	4701	6737	5011	11267	6524	4030	FXYD3
1857	ENSG00000089472	340	4121	777	451	216	322	234	329	290	406	412	199	196	473	611	459	257	431	408	136	324	379	182	232	617	665	282	363	718	HEPH
1858	ENSG00000089486	456	959	619	391	1261	594	469	764	767	913	734	377	499	769	689	203	176	205	171	601	354	406	814	570	598	373	1883	690	787	CDIP1
1859	ENSG00000089505	17	29	40	13	45	15	15	26	22	26	10	22	20	23	31	25	21	19	23	29	6	2	22	25	26	12	37	18	23	CMTM1
1860	ENSG00000089558	2	2	6	2	5	23	3	9	5	10	11	32	3	4	13	2	3	4	4	6	2	4	16	2	28	10	9	13	8	KCNH4
1861	ENSG00000089597	6401	7783	10606	5500	13430	7286	5039	9533	10886	12441	11043	7624	8023	9075	11677	1999	1423	1484	1940	8256	3484	3510	3376	5368	7949	5902	9212	7195	6124	GANAB
1862	ENSG00000089639	785	416	1337	654	829	767	593	783	891	2053	1111	563	586	974	1674	152	103	86	109	743	433	563	873	1095	958	683	761	813	740	GMIP
1863	ENSG00000089682	491	437	720	365	524	346	333	480	542	372	491	385	361	581	635	865	410	695	866	700	414	150	401	302	621	616	482	641	446	RBM41
1864	ENSG00000089685	257	153	202	87	635	105	81	165	268	220	144	193	251	288	180	117	26	37	36	198	113	175	292	234	221	253	198	205	65	BIRC5
1865	ENSG00000089692	32	24	101	51	54	68	93	59	75	298	175	125	53	88	336	6	4	2	8	74	35	23	107	237	38	15	41	117	63	LAG3
1866	ENSG00000089693	5149	2951	6139	3126	5349	2766	2488	4301	5202	5309	4950	2560	4648	5118	5005	790	568	589	558	5270	5517	4748	4079	4147	4876	4960	9187	4023	4371	MLF2
1867	ENSG00000089723	2030	922	2311	1190	1272	1458	906	1363	2764	924	3753	349	1093	1864	2364	995	405	442	446	2143	3266	2136	713	1725	3429	2152	4688	1793	1697	OTUB2
1868	ENSG00000089737	3597	3083	5951	3011	6723	2830	2175	4135	4119	6268	4578	4737	3010	4096	5393	2392	1798	1838	2228	4941	2947	1850	2214	4536	3776	2882	4913	3697	3506	DDX24
1869	ENSG00000089775	125	154	235	132	313	133	97	160	165	183	186	142	105	161	260	286	216	228	320	179	132	57	205	237	278	109	216	207	189	ZBTB25
1870	ENSG00000089818	811	848	1096	670	958	750	634	1181	1191	1244	807	751	891	1219	1344	635	519	611	680	1039	783	559	1134	1132	915	881	1054	856	777	NECAP1
1871	ENSG00000089820	325	178	892	449	747	688	509	415	537	2379	954	1930	551	525	1779	88	94	65	85	360	206	148	1895	1172	328	132	244	494	358	ARHGAP4
1872	ENSG00000089847	8	7	10	6	42	17	27	24	27	58	39	36	7	21	39	3	5	6	3	12	14	2	7	17	19	3	11	30	20	ANKRD24
1873	ENSG00000089876	2040	992	2739	1300	1654	1343	1140	1746	2199	1907	2329	1091	1422	1793	1687	1530	999	1007	1260	2113	2052	1067	935	1080	2457	2076	1896	1445	1726	DHX32
1874	ENSG00000089902	3258	2186	4847	2306	4213	1925	1489	2620	3998	3638	2995	1389	2972	2801	3700	1050	595	874	1223	3217	2506	1448	984	1783	3172	3151	4330	3096	2692	RCOR1
1875	ENSG00000089916	1322	1557	2403	1182	2112	1000	826	1250	1295	1379	1653	1120	993	1242	1820	2857	1642	2600	2796	1899	1740	541	827	1366	2005	1403	1848	2185	1774	GPATCH2L
1876	ENSG00000090006	1557	2591	2126	1312	3648	2600	1947	3296	4458	4779	4045	2157	1545	3025	4145	387	354	344	274	3887	2941	1037	1539	2393	2767	2014	2145	2424	3333	LTBP4
1877	ENSG00000090013	1393	581	1286	626	1239	771	489	945	1031	1249	1025	834	811	970	965	485	379	355	356	1448	1151	1635	1852	1520	1554	740	2346	990	993	BLVRB
1878	ENSG00000090020	1879	1127	3137	1307	2013	1296	894	1980	2258	3279	2659	851	1542	1966	2767	81	83	105	124	2307	1152	1364	717	1037	1707	1616	2350	1594	1721	SLC9A1
1879	ENSG00000090054	2543	1395	2783	1444	3149	1819	1562	2414	2694	3227	2338	1508	2391	2754	2661	1864	1101	1394	1812	2526	2457	2103	2607	2813	2767	2115	3411	2492	2450	SPTLC1
1880	ENSG00000090060	5693	5389	8314	4284	10366	4980	3380	7100	8202	8413	7070	4804	6363	7786	7746	5174	2479	4374	4923	6526	5016	3915	4526	5841	7765	5046	6553	5891	5679	PAPOLA
1881	ENSG00000090061	1768	1152	2298	1162	2657	1339	1003	1757	2212	3063	2284	1327	1733	1880	2412	493	263	403	534	1953	1423	1005	954	1714	1928	1823	2174	1469	1502	CCNK
1882	ENSG00000090097	990	641	860	472	1272	495	497	849	691	1039	1114	404	530	694	798	172	103	138	138	988	684	816	677	615	916	480	704	656	784	PCBP4
1883	ENSG00000090104	128	142	682	368	219	364	316	202	383	1176	221	330	482	232	540	88	33	26	84	278	77	335	1591	2987	481	526	259	704	484	RGS1
1884	ENSG00000090238	1419	736	1393	777	1223	1548	1400	2135	2232	1617	3035	1057	1248	2386	1714	368	314	276	284	1978	1545	1000	1781	1751	1503	928	1327	1014	1029	YPEL3
1885	ENSG00000090263	609	286	773	409	581	413	310	613	509	550	345	577	504	415	463	372	211	226	294	680	596	1022	1261	767	831	612	1282	637	482	MRPS33
1886	ENSG00000090266	1341	798	1427	750	1069	876	777	1056	1327	1309	924	1033	909	1084	1242	855	462	572	612	1263	1193	1800	1648	1197	1308	1193	1585	1098	1154	NDUFB2
1887	ENSG00000090273	2014	1558	2621	1258	2776	1461	925	1971	2098	3033	1784	1620	1592	1952	2389	642	500	574	470	2166	1348	1645	1568	1524	2016	1788	2344	1826	1598	NUDC
1888	ENSG00000090316	3568	2042	2689	1476	2295	2109	1344	2869	3046	3421	3426	1774	2654	3471	3602	690	525	509	594	3372	2619	2125	2104	2190	2974	1969	3416	3142	2562	MAEA
1889	ENSG00000090339	335	156	961	485	434	423	423	236	270	1921	529	348	281	236	1065	150	169	110	108	273	377	384	469	684	589	220	347	650	1646	ICAM1
1890	ENSG00000090372	2814	2244	3535	1733	3521	1782	1651	2494	2798	4199	3795	1956	2073	3684	3715	499	374	417	386	3055	2423	1407	1678	2403	3314	2338	3460	2681	2408	STRN4
1891	ENSG00000090376	336	577	868	539	812	670	410	683	791	1109	841	514	532	451	701	748	586	782	1064	569	260	285	1042	1174	694	478	2377	733	918	IRAK3
1892	ENSG00000090382	860	375	3672	2171	1708	3285	2121	1393	3207	10110	2288	1350	988	2861	4522	948	619	732	835	806	445	6701	5796	7184	858	228	1620	2967	3078	LYZ
1893	ENSG00000090402	0	0	1	0	0	0	0	0	0	0	0	1	0	1	0	1	0	0	4	0	0	0	0	0	0	0	0	0	0	SI
1894	ENSG00000090432	1271	856	1285	717	1169	731	485	908	1115	1227	1124	599	893	880	998	365	287	229	233	912	816	1107	735	946	1372	1201	1455	1035	879	MUL1
1895	ENSG00000090447	407	554	588	272	888	394	251	530	626	825	553	651	473	528	515	127	116	121	116	599	281	282	290	342	494	515	596	361	309	TFAP4
1896	ENSG00000090470	514	564	1113	583	918	638	438	773	933	894	613	356	399	540	685	374	272	338	398	825	570	283	552	703	720	743	859	687	523	PDCD7
1897	ENSG00000090487	1913	1906	3021	1548	2464	1553	1189	1967	2346	2420	1901	1442	1587	2029	2204	1070	703	851	967	2048	1388	2272	2146	1814	2360	2092	2399	1792	1928	SPG21
1898	ENSG00000090512	154	45	97	52	197	138	132	158	381	58	419	32	126	90	152	59	27	10	39	218	183	159	105	128	151	138	274	316	153	FETUB
1899	ENSG00000090520	1873	1487	2866	1506	2944	1534	1007	1711	2305	2875	2124	1272	1735	1834	2944	846	489	704	701	2162	1800	1704	1406	1701	2041	2445	2568	1879	1897	DNAJB11
1900	ENSG00000090530	1434	1717	1334	732	529	963	482	1157	1303	881	1615	345	1506	299	767	334	273	291	228	2739	1164	2212	317	331	491	814	621	821	1049	LEPREL1
1901	ENSG00000090534	5	52	13	11	7	8	4	2	8	23	12	5	2	2	7	7	6	6	7	7	4	3	10	7	8	3	4	2	12	THPO
1902	ENSG00000090539	122	982	293	187	133	241	165	179	256	377	682	171	122	124	348	168	137	142	108	192	61	34	84	106	157	132	100	113	365	CHRD
1903	ENSG00000090554	61	52	194	101	108	113	106	116	84	314	177	209	80	74	264	33	30	24	17	85	25	90	331	351	112	81	55	142	109	FLT3LG
1904	ENSG00000090565	772	1376	1687	906	1532	863	709	1185	1404	1549	2084	542	638	723	1197	234	214	203	292	1423	806	417	498	932	1350	719	1305	1113	1307	RAB11FIP3
1905	ENSG00000090581	830	776	1117	620	1218	918	767	1181	1233	1459	1355	638	774	1287	1323	451	343	354	375	1228	1044	1022	1368	1199	1313	685	1797	883	960	GNPTG
1906	ENSG00000090612	303	551	506	260	826	355	300	487	378	478	289	213	340	559	630	891	372	754	749	470	436	246	391	545	443	349	410	406	316	ZNF268
1907	ENSG00000090615	2903	2754	4217	2155	4171	2706	1866	3318	4518	3968	4037	1708	1820	4681	4960	2213	1593	1892	2409	3630	2277	727	1228	2668	3265	2236	3585	3021	2901	GOLGA3
1908	ENSG00000090621	3040	2663	4302	2206	5191	2761	2028	3659	4422	5708	3191	3350	2145	3846	4229	911	709	820	861	3810	1843	1693	2311	2699	2891	2758	2986	2614	2461	PABPC4
1909	ENSG00000090659	80	149	1710	828	171	608	147	178	405	2102	268	231	228	119	602	122	124	108	117	96	24	507	416	417	193	30	430	887	326	CD209
1910	ENSG00000090661	2434	1821	1776	1076	2703	1486	725	2263	2328	1413	3028	803	1149	2195	2244	755	331	393	478	1414	2337	2019	1656	2522	4747	1593	7176	1874	1872	CERS4
1911	ENSG00000090674	631	494	873	452	685	522	433	770	786	836	925	562	520	980	829	110	96	90	124	771	596	492	564	660	896	581	1012	547	650	MCOLN1
1912	ENSG00000090686	1520	2016	2611	1403	2959	1740	1356	2018	2091	2604	1992	1692	1193	2560	2843	2120	1195	1826	2193	2132	1304	650	1447	1744	2222	1585	1787	1888	1768	USP48
1913	ENSG00000090776	4197	3639	4013	2113	4259	1794	1899	3215	3342	2926	2848	1061	2915	2109	3357	596	337	362	540	5954	3918	2568	1064	2096	4355	4842	5118	4954	4322	EFNB1
1914	ENSG00000090857	460	1406	2318	1212	2290	889	658	1172	1297	1163	1386	586	563	1070	1261	721	668	450	523	911	783	311	357	615	1604	840	1754	1523	1378	PDPR
1915	ENSG00000090861	2215	2642	4117	2063	4479	2185	1429	2806	3381	3620	1884	2213	1817	2570	3764	948	677	802	794	3595	1295	1230	1789	1898	2209	1320	1958	2514	1943	AARS
1916	ENSG00000090863	3040	3706	5660	3049	4774	3009	2059	3589	4558	4632	3522	2263	1976	2284	4246	2372	1796	2074	2779	3365	1882	1053	1266	2870	4467	2294	4210	3550	3394	GLG1
1917	ENSG00000090889	707	411	616	260	1500	329	238	535	732	778	439	677	411	926	706	265	62	90	100	701	272	146	418	362	566	793	367	594	205	KIF4A
1918	ENSG00000090905	2045	3396	3045	1606	3360	1761	1342	2264	2151	2621	3849	1796	1511	2973	3352	2491	2053	2628	3359	3397	2459	459	1936	2458	2512	1987	2733	2276	2195	TNRC6A
1919	ENSG00000090920	567	781	4154	2302	4654	2067	1954	3024	2453	2618	1066	793	942	1444	4943	681	866	524	982	736	274	879	762	2508	3585	1355	3798	2035	2090	FCGBP
1920	ENSG00000090924	1335	1119	1396	809	722	753	735	627	959	2247	2162	1089	983	610	1389	105	70	62	100	1047	603	360	487	695	773	928	456	810	1093	PLEKHG2
1921	ENSG00000090932	6	13	1	0	42	10	5	13	7	6	0	25	15	13	7	1	0	0	1	17	7	6	0	4	5	8	4	9	13	DLL3
1922	ENSG00000090971	129	191	100	55	480	85	81	149	161	157	138	191	102	269	202	29	8	14	18	166	93	95	96	127	109	109	132	103	131	NAT14
1923	ENSG00000090975	629	613	720	386	767	461	365	611	925	1451	1106	707	403	1126	984	151	109	126	159	778	479	153	291	525	953	611	823	484	603	PITPNM2
1924	ENSG00000090989	2208	1514	2595	1356	2568	1649	1257	2095	1941	2430	2391	1542	1883	2880	2381	2776	1353	2133	2257	2584	2016	878	1689	2076	2732	1699	2025	2139	1882	EXOC1
1925	ENSG00000091009	1398	1561	2260	1176	2330	1221	928	1628	1707	1730	1514	1112	986	1686	1705	2208	1157	1887	1979	1681	1006	616	836	1113	2366	1607	2284	1708	1695	RBM27
1926	ENSG00000091010	0	1	1	2	2	1	2	8	2	3	1	2	2	4	4	0	1	1	1	12	2	1	0	3	3	1	8	1	0	POU4F3
1927	ENSG00000091039	3005	3118	6684	3536	4063	2431	1999	3226	3615	3409	4110	2479	2183	3408	4671	8004	2562	5991	6354	4329	3122	1481	2606	3468	6478	3799	5525	4709	5082	OSBPL8
1928	ENSG00000091073	477	408	948	463	1479	701	569	991	894	1682	1043	1075	625	1562	1969	216	178	187	215	754	502	519	884	1045	1023	785	1463	613	519	DTX2
1929	ENSG00000091106	35	24	92	51	32	64	34	70	58	110	32	47	42	61	69	43	40	35	61	26	22	60	64	64	28	27	56	45	30	NLRC4
1930	ENSG00000091127	1071	772	1600	788	1296	915	693	1241	1339	1517	1233	1326	956	967	1478	585	351	564	518	1530	910	535	513	787	1210	1872	1491	1252	962	PUS7
1931	ENSG00000091128	488	404	941	1424	3353	563	577	557	1024	1288	994	389	188	1048	1605	2869	3035	2563	3062	1476	1845	25	1084	274	1313	39	340	2300	1142	LAMB4
1932	ENSG00000091129	185	140	216	156	175	274	196	149	385	729	296	106	242	187	512	132	49	160	151	389	365	232	217	334	476	301	620	961	183	NRCAM
1933	ENSG00000091136	4087	8141	8149	4879	5956	4576	2247	6624	5802	6576	7614	1840	3266	2970	5872	2878	2297	2812	2753	5042	3182	1149	1853	1967	6901	3835	7064	7000	5986	LAMB1
1934	ENSG00000091137	9	12	18	4	31	34	21	21	13	26	11	19	6	51	18	29	15	38	37	5	5	124	28	21	5	8	51	20	16	SLC26A4
1935	ENSG00000091138	0	1	3	1	2	2	10	37	0	4	0	3	0	0	3	21	6	15	18	0	0	3	2	51	11	1	50	1	7	SLC26A3
1936	ENSG00000091140	2763	1731	3471	1721	2875	2167	1740	3220	2945	3195	1946	1783	1873	2892	2819	1923	837	1479	1391	2789	2359	1800	2703	3232	3739	2511	7785	2917	2378	DLD
1937	ENSG00000091157	452	496	1269	551	1280	479	306	647	645	708	822	553	307	610	945	1289	778	995	1333	729	312	224	344	561	830	505	775	767	827	WDR7
1938	ENSG00000091164	2108	1453	2699	1423	2464	1560	1047	2010	2143	2205	2288	1094	1494	1843	2011	1308	557	1088	1264	2053	1739	2430	2150	2020	2353	1928	3113	1865	1953	TXNL1
1939	ENSG00000091181	1	3	10	1	5	16	6	1	7	6	6	10	6	1	22	13	14	10	26	5	2	31	16	13	4	0	4	2	4	IL5RA
1940	ENSG00000091262	25	30	36	7	30	25	20	57	47	37	61	13	24	23	29	29	21	40	32	24	23	18	16	44	20	24	81	20	34	ABCC6
1941	ENSG00000091317	3097	3858	5120	2991	4991	4235	3271	4275	4578	6069	4091	1206	2712	4816	4944	4086	1688	2649	3697	3131	3516	5544	4296	4349	6835	4170	9372	4126	4904	CMTM6
1942	ENSG00000091409	23167	6117	14178	7993	26092	6453	3367	11919	11501	13006	14391	4729	13892	14939	23022	5230	3024	4538	4560	17314	21853	13822	5659	3653	17793	26625	6700	22026	16434	ITGA6
1943	ENSG00000091428	890	337	1325	732	1175	661	693	1065	1491	846	1246	486	536	768	1299	1792	1068	1358	1531	1969	1518	278	530	503	851	427	366	902	1133	RAPGEF4
1944	ENSG00000091436	3467	1770	2565	1472	2651	1608	1140	1707	3160	3159	2743	1708	2213	1487	3018	2338	1255	1994	2395	3188	1759	2358	1242	1409	2976	4610	1860	2395	2538	MLTK
1945	ENSG00000091482	0	0	0	0	0	0	1	0	0	0	0	1	0	0	0	1	0	0	1	0	0	2	1	1	0	0	0	0	0	SMPX
1946	ENSG00000091483	2488	1467	2847	1496	2967	1655	1073	2326	2318	3014	1899	2516	1647	3172	2468	1246	689	942	894	2925	1533	2153	1963	1939	2559	1593	4749	1717	1727	FH
1947	ENSG00000091490	406	717	1373	686	752	932	496	572	690	1176	965	537	1160	657	2010	311	219	220	345	526	380	962	1275	1405	1016	931	972	2054	781	SEL1L3
1948	ENSG00000091513	79	38	57	20	357	362	297	1261	732	164	141	137	136	241	319	155	90	222	197	102	174	171	630	971	1417	205	7540	69	128	TF
1949	ENSG00000091527	7728	3445	11669	6150	6202	5216	3186	6467	9836	7256	8176	3806	7103	4891	8342	3296	2142	2563	3041	8167	6021	4824	3625	5143	8214	8456	9694	6260	5810	CDV3
1950	ENSG00000091536	6	28	18	12	35	27	29	54	19	32	28	28	15	20	35	20	26	19	23	53	28	2	25	26	21	9	13	6	12	MYO15A
1951	ENSG00000091542	1801	1195	3009	1605	2826	1494	1225	2240	2553	2508	2588	1260	1165	1382	1970	712	589	559	670	1898	1121	1357	1193	1630	2084	1188	1929	1852	1701	ALKBH5
1952	ENSG00000091583	0	0	0	0	0	0	0	0	0	0	0	1	1	0	0	0	0	0	0	0	0	0	0	0	0	0	0	0	0	APOH
1953	ENSG00000091592	2944	1737	2962	1698	1956	2337	2469	4367	3255	3434	3796	2821	1546	2331	5129	1341	1331	1104	1775	5197	3902	516	2971	4123	1931	1293	920	2388	2737	NLRP1
1954	ENSG00000091622	1550	747	2285	1219	3166	921	966	1829	2792	1259	2323	768	769	1792	2127	696	510	674	668	2923	1497	310	598	462	1673	1024	1047	1795	1256	PITPNM3
1955	ENSG00000091640	1050	588	1032	527	1160	564	408	718	792	910	982	723	572	688	893	419	329	323	348	1099	1136	915	1421	1119	875	594	1195	848	739	SPAG7
1956	ENSG00000091651	355	247	342	140	591	242	187	284	433	454	206	209	140	261	213	148	34	70	68	450	291	97	270	271	192	578	255	235	109	ORC6
1957	ENSG00000091656	54	105	384	157	268	93	79	94	83	65	55	60	127	60	99	265	258	371	469	103	148	13	31	195	129	138	131	263	162	ZFHX4
1958	ENSG00000091664	0	0	0	0	0	0	0	0	0	0	0	0	0	0	0	0	1	0	0	0	2	3	0	0	0	0	0	0	0	SLC17A6
1959	ENSG00000091704	0	0	0	1	0	2	0	4	1	0	5	3	1	0	1	0	1	0	5	1	0	2	1	5	3	1	14	1	1	CPA1
1960	ENSG00000091732	310	320	373	196	428	232	160	338	283	379	237	312	238	350	355	149	71	128	137	319	214	239	314	324	318	335	323	267	206	ZC3HC1
1961	ENSG00000091831	81	88	1893	601	199	379	102	276	350	188	290	209	168	106	243	358	184	303	396	80	52	75	278	230	226	70	466	189	231	ESR1
1962	ENSG00000091844	8	6	17	5	9	11	3	24	15	50	17	21	31	7	4	48	20	36	51	23	11	10	6	12	3	11	3	10	11	RGS17
1963	ENSG00000091879	251	193	361	264	353	206	112	195	162	502	438	186	336	209	350	497	277	443	587	161	130	111	110	125	137	108	158	280	635	ANGPT2
1964	ENSG00000091947	518	543	722	374	849	470	343	576	603	719	474	334	507	725	504	314	201	200	225	648	472	694	854	761	702	537	931	597	475	TMEM101
1965	ENSG00000091972	146	199	206	134	111	252	154	230	73	235	58	67	53	99	227	181	85	135	113	92	69	212	294	346	264	112	1177	157	163	CD200
1966	ENSG00000091986	534	1860	3832	2336	1981	3953	2725	2470	2597	5809	6201	2671	893	1371	4387	7699	4627	9627	11522	514	325	1086	1436	2592	1938	1099	1679	1097	6022	CCDC80
1967	ENSG00000092009	37	66	232	175	91	94	37	55	87	88	61	115	29	57	90	158	107	208	193	44	12	185	119	114	34	7	74	75	87	CMA1
1968	ENSG00000092010	2775	1802	3297	1828	4176	2063	1840	2285	2080	4939	2694	3393	2422	2948	4146	1420	995	1062	1077	2335	1841	3595	4989	4322	2696	1684	3004	3370	2772	PSME1
1969	ENSG00000092020	413	206	438	247	406	259	177	310	282	475	297	403	315	467	418	369	146	244	319	342	342	371	457	419	339	238	401	354	380	PPP2R3C
1970	ENSG00000092036	219	226	224	126	467	195	148	251	234	359	197	198	88	397	280	246	155	162	198	333	152	161	234	216	242	104	211	225	209	HAUS4
1971	ENSG00000092051	13	22	46	26	68	27	32	38	52	42	42	23	11	20	72	18	21	19	25	26	34	14	18	14	29	11	17	34	44	JPH4
1972	ENSG00000092054	1	5	0	0	14	1	1	2	0	10	0	6	1	0	3	2	0	2	0	0	0	0	2	3	0	0	0	2	0	MYH7
1973	ENSG00000092067	1	2	4	5	0	1	0	3	2	4	3	1	3	2	5	1	1	2	0	0	4	2	5	1	2	0	2	1	1	CEBPE
1974	ENSG00000092068	2659	7561	4759	2248	4221	1977	932	6733	3271	2366	8360	1132	5163	1728	2836	338	191	169	192	5936	4894	2348	747	1349	1563	2630	816	10558	3711	SLC7A8
1975	ENSG00000092094	546	827	758	395	1003	742	583	840	967	1377	1236	831	463	1077	1255	609	378	539	684	949	583	486	488	702	695	570	673	698	699	OSGEP
1976	ENSG00000092096	110	474	197	105	530	317	242	496	333	308	324	348	152	232	345	64	87	63	60	272	136	110	74	250	295	177	216	212	236	SLC22A17
1977	ENSG00000092098	542	487	673	340	977	562	456	715	712	1318	809	522	375	930	1294	205	169	180	199	791	486	186	313	614	732	410	692	638	521	RNF31
1978	ENSG00000092108	2320	1258	1655	971	1914	1330	950	1774	1926	2125	1681	1393	1486	1820	2059	1925	916	1514	1819	2199	1809	1340	1466	1515	1929	1633	1941	1705	1440	SCFD1
1979	ENSG00000092140	464	1038	787	479	1545	521	445	708	713	982	719	487	523	1208	970	1202	450	1024	1051	925	515	261	566	712	716	592	762	836	546	G2E3
1980	ENSG00000092148	11889	6794	13219	7056	10902	5970	3911	7225	11956	6898	10200	4702	6321	9284	11603	14819	8527	10789	12002	13813	10808	3279	3279	6445	13950	11413	13319	11260	9803	HECTD1
1981	ENSG00000092199	11778	7754	13196	6632	16658	7642	4452	10570	11833	15679	9873	8341	10560	10196	11986	6248	3589	4851	5495	11283	9474	10316	9698	13810	11637	11002	13640	10607	9196	HNRNPC
1982	ENSG00000092200	18	23	57	27	58	24	27	19	19	64	31	27	6	54	34	37	25	24	45	26	10	10	12	111	29	9	46	20	27	RPGRIP1
1983	ENSG00000092201	4564	4631	6117	3249	10740	3693	2520	5163	5613	7333	5016	4530	3023	6213	6937	3358	2150	2595	2756	6523	3533	1739	1727	3959	5276	4846	5710	5870	4350	SUPT16H
1984	ENSG00000092203	3665	2233	4027	2169	3409	2208	1422	2840	3387	3592	4094	1888	3155	3211	3531	1530	972	1277	1473	3401	2985	2428	1756	2728	3763	3305	3703	3037	2900	TOX4
1985	ENSG00000092208	209	243	295	140	383	229	132	266	248	335	202	258	232	355	307	242	127	207	165	254	192	183	212	219	262	243	171	245	146	GEMIN2
1986	ENSG00000092295	22886	3801	8757	4267	5391	7817	2383	6381	19721	7868	11385	3563	15451	9775	9152	901	596	355	597	9821	6701	14590	3713	4333	6066	10410	8618	8525	6589	TGM1
1987	ENSG00000092330	2873	1087	2697	1534	1863	1292	810	1382	2022	2401	2308	1231	2519	1568	2138	764	598	628	666	2054	1891	2012	1574	1739	1912	1950	1585	1945	1809	TINF2
1988	ENSG00000092345	2	1	28	18	2	10	19	4	5	27	9	9	2	6	29	8	0	1	3	0	0	25	46	27	4	1	3	5	7	DAZL
1989	ENSG00000092377	0	23	21	6	0	16	9	32	46	23	7	3	11	16	22	0	0	0	70	0	36	16	26	46	54	38	145	0	33	TBL1Y
1990	ENSG00000092421	210	1390	711	548	435	434	329	542	316	350	434	263	312	304	472	598	375	559	717	485	607	303	351	503	780	372	551	467	962	SEMA6A
1991	ENSG00000092439	1582	2750	3646	1916	3930	1631	1225	2299	2313	2196	2242	1136	1220	2905	3009	5001	2129	3705	4501	2593	2029	530	1751	1782	3326	1912	2347	2800	2536	TRPM7
1992	ENSG00000092445	1516	1208	1705	791	1424	1323	1010	1450	2346	1600	1878	722	1095	1468	1998	764	509	581	621	1912	1470	1205	654	1063	1709	1315	2047	1419	1480	TYRO3
1993	ENSG00000092470	449	448	501	243	756	286	161	473	510	1033	391	674	223	681	755	549	170	303	347	819	201	180	412	337	413	393	330	349	274	WDR76
1994	ENSG00000092529	59	63	80	34	68	92	73	104	109	66	87	38	63	78	110	93	66	65	122	181	69	5	66	68	72	36	37	56	58	CAPN3
1995	ENSG00000092531	926	681	1481	752	1060	665	497	805	792	1147	1040	615	650	936	1117	789	502	601	778	931	781	695	1258	1078	1049	710	714	987	966	SNAP23
1996	ENSG00000092607	102	384	294	149	193	203	135	176	168	218	305	191	115	91	146	434	326	461	436	42	41	105	128	165	108	99	95	115	301	TBX15
1997	ENSG00000092621	1189	5144	7402	2917	8272	2338	2016	4414	4159	3090	5786	3119	1364	4820	4525	1406	562	949	649	3899	2573	1289	1688	3166	2807	1588	2851	2095	2858	PHGDH
1998	ENSG00000092758	83	48	104	53	368	81	50	136	113	152	62	58	129	92	127	32	34	28	20	178	63	48	284	85	83	100	131	105	97	COL9A3
[truncated: 55,280 more rows]
