# Supplementary material for: RNA-seq reveals more consistent reference genes for gene expression studies in human non-melanoma skin cancers
Source: PeerJ. 2017 Aug 21;5:e3631. doi: 10.7717/peerj.3631 (PMC5572537; doi:10.7717/peerj.3631)
Supplement: Table S2 [file peerj-05-3631-s004.xlsx]

## Sheet: Sheet1
Supplementary Table 2 : Samples code, diagnosis and sequencing reads
Sample ID	Diagnosis	Paired Reads	Participant Code
AK_17	AK	45483016	AKSFS01
AK_21	IEC	29138443	AKSFS16
IEC_22	AK	58545887	AKSFS16
AK_23	AK	29373746	AKSFS27
AK_24	AK	45995456	VH005
SCC_1	SCC	29553434	VH005
AK_2	AK	22107438	VH005
AK_3	AK	36366915	VH005
AK_4	IEC	45894069	VH006
IEC_5	IEC	48615451	VH006
IEC_6	IEC	47233402	VH009
IEC_8	IEC	27389909	VH011
IEC_9	IEC	33592904	VH016
IEC_19	IEC	37383044	AKSFS30
IEC_20	IEC	49273195	AKSFS30
NORM_1	NORMAL	46163351	PR001
NORM_2	NORMAL	26075503	PR002
NORM_3	NORMAL	38541825	PR003
NORM_4	NORMAL	44847046	PR004
AK_25	AK	45094315	VH008
AK_7	AK	35760190	VH009
AK_10	AK	35526667	VH018
SCC_11	SCC	36970527	VH019
SCC_12	SCC	33378302	VH019
SCC_13	AK	44159039	VH020
AK_14	SCC	34181975	VH020
AK_15	AK	49956208	VH021
SCC_16	SCC	38320836	VH022
AK_18	AK	37811984	VH026
		3.90598e+07
*For more details please refer to ArrayExpress entry accession number: E-MTAB-5678.
