# Supplementary material for: RNA-seq reveals more consistent reference genes for gene expression studies in human non-melanoma skin cancers
Source: PeerJ. 2017 Aug 21;5:e3631. doi: 10.7717/peerj.3631 (PMC5572537; doi:10.7717/peerj.3631)
Supplement: Table S3 [file peerj-05-3631-s005.xlsx]

## Sheet: Sheet1
Table 3: Total length of all exons in the gene
Gene	Length
ENSG00000232470	399
ENSG00000004838	1809
ENSG00000242163	400
ENSG00000100129	3008
ENSG00000184523	251
ENSG00000222499	354
ENSG00000223474	2076
ENSG00000250490	556
ENSG00000160714	2981
ENSG00000227409	457
ENSG00000239547	294
ENSG00000245928	1682
ENSG00000186272	5444
ENSG00000234270	318
ENSG00000123838	2075
ENSG00000110446	1481
ENSG00000151806	6133
ENSG00000213770	573
ENSG00000227627	660
ENSG00000235886	408
ENSG00000166111	3383
ENSG00000236362	522
ENSG00000212025	93
ENSG00000214318	411
ENSG00000227568	739
ENSG00000206846	93
ENSG00000266237	837
ENSG00000227718	829
ENSG00000258650	165
ENSG00000166435	8818
ENSG00000249526	562
ENSG00000252137	90
ENSG00000257434	2944
ENSG00000271525	540
ENSG00000215159	586
ENSG00000249036	568
ENSG00000242663	457
ENSG00000225300	1958
ENSG00000241743	494
ENSG00000213338	1072
ENSG00000243422	467
ENSG00000207421	66
ENSG00000270919	537
ENSG00000132434	1793
ENSG00000206625	106
ENSG00000033867	4420
ENSG00000166035	3231
ENSG00000258064	766
ENSG00000189143	6141
ENSG00000189283	3217
ENSG00000102103	1020
ENSG00000263603	364
ENSG00000264800	75
ENSG00000198857	1129
ENSG00000145740	4929
ENSG00000259716	712
ENSG00000250801	640
ENSG00000134202	1888
ENSG00000157358	1859
ENSG00000237412	2435
ENSG00000271412	375
ENSG00000253005	104
ENSG00000119812	3354
ENSG00000266968	1777
ENSG00000263357	109
ENSG00000102081	2750
ENSG00000204001	860
ENSG00000115041	3051
ENSG00000111678	694
ENSG00000215369	292
ENSG00000264089	71
ENSG00000233926	1634
ENSG00000149609	569
ENSG00000243264	388
ENSG00000232458	3260
ENSG00000238109	1392
ENSG00000154310	7163
ENSG00000264038	93
ENSG00000251275	340
ENSG00000166257	8156
ENSG00000213450	846
ENSG00000205794	2308
ENSG00000213923	3409
ENSG00000257357	1833
ENSG00000264271	281
ENSG00000251932	90
ENSG00000234859	3886
ENSG00000253934	464
ENSG00000230748	624
ENSG00000267197	355
ENSG00000221961	1166
ENSG00000132432	1241
ENSG00000149506	1572
ENSG00000036549	4251
ENSG00000147905	1162
ENSG00000186008	749
ENSG00000075461	3376
ENSG00000224920	1449
ENSG00000233994	607
ENSG00000224152	1492
ENSG00000260244	2614
ENSG00000140511	1413
ENSG00000229852	3359
ENSG00000172239	1995
ENSG00000225595	2456
ENSG00000267781	464
ENSG00000252361	101
ENSG00000262180	883
ENSG00000131126	1663
ENSG00000250497	4780
ENSG00000162641	4339
ENSG00000224553	347
ENSG00000245248	1982
ENSG00000212082	90
ENSG00000243410	439
ENSG00000115425	2156
ENSG00000156261	1886
ENSG00000232019	780
ENSG00000175061	1214
ENSG00000267241	536
ENSG00000257731	1177
ENSG00000188112	6771
ENSG00000264948	300
ENSG00000260263	1561
ENSG00000260683	1899
ENSG00000253988	594
ENSG00000138092	1870
ENSG00000197308	672
ENSG00000266458	100
ENSG00000105738	6905
ENSG00000237574	2394
ENSG00000100836	1470
ENSG00000199546	107
ENSG00000219784	660
ENSG00000234750	848
ENSG00000130382	1282
ENSG00000249101	174
ENSG00000223145	317
ENSG00000225137	1837
ENSG00000207294	99
ENSG00000266399	51
ENSG00000236998	1246
ENSG00000248931	1134
ENSG00000042429	6577
ENSG00000202402	100
ENSG00000113758	2835
ENSG00000163106	2006
ENSG00000254821	638
ENSG00000261737	960
ENSG00000253543	375
ENSG00000185467	1715
ENSG00000153779	1775
ENSG00000207160	105
ENSG00000241696	477
ENSG00000249792	656
ENSG00000074800	3017
ENSG00000261566	712
ENSG00000129965	1892
ENSG00000215796	1230
ENSG00000102890	2597
ENSG00000255005	444
ENSG00000258252	2564
ENSG00000266614	460
ENSG00000231049	950
ENSG00000238003	307
ENSG00000261690	1122
ENSG00000138621	3068
ENSG00000235829	324
ENSG00000147689	1328
ENSG00000241216	300
ENSG00000243596	430
ENSG00000002745	3143
ENSG00000131368	719
ENSG00000128573	8363
ENSG00000203757	995
ENSG00000183735	3019
ENSG00000244515	1269
ENSG00000255138	621
ENSG00000199927	214
ENSG00000250463	591
ENSG00000119509	2660
ENSG00000231461	729
ENSG00000168070	1283
ENSG00000248355	437
ENSG00000232696	462
ENSG00000102575	2216
ENSG00000211745	453
ENSG00000206738	100
ENSG00000090530	2822
ENSG00000268412	407
ENSG00000266590	90
ENSG00000269547	1947
ENSG00000235035	432
ENSG00000225342	581
ENSG00000228004	966
ENSG00000259985	1168
ENSG00000186564	4674
ENSG00000224613	465
ENSG00000228923	478
ENSG00000238460	147
ENSG00000271646	2502
ENSG00000234775	378
ENSG00000270230	520
ENSG00000229582	507
ENSG00000261291	508
ENSG00000270496	515
ENSG00000187266	1875
ENSG00000236336	367
ENSG00000109475	1345
ENSG00000183520	3471
ENSG00000223746	297
ENSG00000219902	370
ENSG00000246763	370
ENSG00000176396	1980
ENSG00000003249	551
ENSG00000226975	526
ENSG00000229745	261
ENSG00000188000	3214
ENSG00000185883	1458
ENSG00000268362	1959
ENSG00000233621	1392
ENSG00000214353	2139
ENSG00000215218	4315
ENSG00000263714	296
ENSG00000249022	557
ENSG00000270083	398
ENSG00000134874	3515
ENSG00000259758	9345
ENSG00000236893	1225
ENSG00000203408	1540
ENSG00000228983	591
ENSG00000206788	102
ENSG00000231700	557
ENSG00000260588	1769
ENSG00000248175	2230
ENSG00000237061	478
ENSG00000262877	1559
ENSG00000227537	334
ENSG00000111788	4027
ENSG00000266463	63
ENSG00000261996	877
ENSG00000254343	520
ENSG00000236101	376
ENSG00000233139	1666
ENSG00000264305	274
ENSG00000106609	4729
ENSG00000267645	1589
ENSG00000264541	69
ENSG00000228694	464
ENSG00000199876	300
ENSG00000169762	4818
ENSG00000215343	3371
ENSG00000253743	1665
ENSG00000139746	6165
ENSG00000173327	8409
ENSG00000137808	1113
ENSG00000163785	2993
ENSG00000214145	3813
ENSG00000161013	2540
ENSG00000222302	124
ENSG00000257323	299
ENSG00000265704	61
ENSG00000215317	1038
ENSG00000106868	2618
ENSG00000223149	106
ENSG00000262434	484
ENSG00000241678	478
ENSG00000241369	988
ENSG00000201710	74
ENSG00000240889	1646
ENSG00000177300	2707
ENSG00000101842	5253
ENSG00000253225	171
ENSG00000254362	564
ENSG00000261377	895
ENSG00000189337	5756
ENSG00000104695	1788
ENSG00000220008	4287
ENSG00000223733	525
ENSG00000258666	383
ENSG00000257643	344
ENSG00000141552	2462
ENSG00000176532	501
ENSG00000134759	3799
ENSG00000207949	109
ENSG00000235203	1068
ENSG00000235494	279
ENSG00000260645	2122
ENSG00000165309	5144
ENSG00000258518	955
ENSG00000261161	505
ENSG00000268543	493
ENSG00000213090	2764
ENSG00000224876	364
ENSG00000268729	357
ENSG00000033050	3733
ENSGR0000167393	2997
ENSG00000234950	804
ENSG00000268482	206
ENSG00000236796	1172
ENSG00000221806	120
ENSG00000134193	3969
ENSG00000092421	5561
ENSG00000230068	690
ENSG00000184166	938
ENSG00000270005	584
ENSG00000022355	7073
ENSG00000207633	83
ENSG00000232663	162
ENSG00000256285	170
ENSG00000264376	251
ENSG00000233774	643
ENSG00000264468	69
ENSG00000228429	786
ENSG00000165985	2491
ENSG00000157131	2345
ENSG00000162227	2353
ENSG00000186994	1872
ENSG00000125703	2459
ENSG00000268538	257
ENSG00000270766	245
ENSG00000165862	1673
ENSG00000185596	2096
ENSG00000259144	2102
ENSG00000251441	3684
ENSG00000249668	549
ENSG00000174325	1035
ENSG00000250752	590
ENSG00000250536	1135
ENSG00000265047	101
ENSG00000197961	2579
ENSG00000120664	560
ENSG00000269925	392
ENSG00000184838	2152
ENSG00000122254	2262
ENSG00000129353	5737
ENSG00000264188	334
ENSG00000233833	1158
ENSG00000224475	775
ENSG00000177946	571
ENSG00000229459	520
ENSG00000222017	1028
ENSG00000118640	801
ENSG00000202479	89
ENSG00000250342	209
ENSG00000082497	431
ENSG00000266843	91
ENSG00000207689	96
ENSG00000200702	101
ENSG00000258413	441
ENSG00000221279	79
ENSG00000258283	277
ENSG00000049759	6694
ENSG00000245317	1452
ENSG00000239659	576
ENSG00000266311	437
ENSG00000264698	71
ENSG00000211869	56
ENSG00000103449	625
ENSG00000242193	3701
ENSG00000214706	2803
ENSG00000176974	2991
ENSG00000071127	3441
ENSG00000243265	451
ENSG00000269028	1019
ENSG00000106823	2651
ENSG00000213244	415
ENSG00000186417	4651
ENSG00000237456	404
ENSG00000133030	6112
ENSG00000263568	93
ENSG00000196553	1243
ENSG00000263424	3287
ENSG00000232046	825
ENSG00000237837	553
ENSG00000226567	426
ENSG00000244425	295
ENSG00000239280	431
ENSG00000070047	5444
ENSG00000221810	81
ENSG00000257017	2204
ENSG00000219755	744
ENSG00000119616	1513
ENSG00000207264	106
ENSG00000265157	49
ENSG00000224397	3162
ENSG00000260673	571
ENSG00000266618	84
ENSG00000259698	407
ENSG00000225561	387
ENSG00000172785	2375
ENSG00000162129	2757
ENSG00000106052	3772
ENSG00000226905	481
ENSG00000207367	106
ENSG00000259873	553
ENSG00000226770	953
ENSG00000243403	347
ENSG00000264749	86
ENSG00000244641	297
ENSG00000164932	1088
ENSG00000257986	524
ENSG00000114790	5391
ENSG00000260602	390
ENSG00000131409	850
ENSG00000251904	110
ENSG00000173662	2813
ENSG00000140955	2603
ENSG00000240210	778
ENSG00000197223	1737
ENSG00000231237	970
ENSG00000183715	1022
ENSG00000231160	1372
ENSG00000266145	323
ENSG00000268351	464
ENSG00000221214	87
ENSG00000242671	2066
ENSG00000221331	99
ENSG00000236924	523
ENSG00000235704	851
ENSG00000226009	847
ENSG00000225463	623
ENSG00000104983	2016
ENSG00000200033	103
ENSG00000174695	3650
ENSG00000196263	6036
ENSG00000109689	3905
ENSG00000238137	532
ENSG00000250846	500
ENSG00000222164	286
ENSG00000250403	740
ENSG00000184677	14562
ENSG00000267228	555
ENSG00000253823	439
ENSG00000241553	1230
ENSG00000122696	2472
ENSG00000225555	469
ENSG00000258168	2262
ENSG00000127241	6415
ENSG00000132329	1075
ENSG00000224243	543
ENSG00000231570	263
ENSG00000267215	641
ENSG00000185627	2780
ENSG00000183733	717
ENSG00000235106	999
ENSG00000126107	3494
ENSG00000255960	477
ENSG00000010319	4773
ENSG00000227585	857
ENSG00000109181	1418
ENSG00000161958	2933
ENSG00000062650	5363
ENSG00000239632	274
ENSG00000267252	783
ENSG00000220583	362
ENSG00000266019	79
ENSG00000250042	495
ENSG00000103502	1996
ENSG00000260126	671
ENSG00000228525	198
ENSG00000265068	85
ENSG00000226752	1970
ENSG00000235061	339
ENSG00000132313	646
ENSG00000244076	155
ENSG00000213971	1403
ENSG00000207183	103
ENSG00000176222	627
ENSG00000144406	17639
ENSG00000267651	2123
ENSG00000236209	761
ENSG00000184349	5037
ENSG00000137449	13124
ENSG00000269392	302
ENSG00000261701	1491
ENSG00000169683	2642
ENSG00000169727	2439
ENSG00000117152	3027
ENSG00000267331	590
ENSG00000266817	90
ENSG00000249828	555
ENSG00000104499	809
ENSG00000249287	1193
ENSG00000243903	693
ENSG00000222973	190
ENSG00000221474	69
ENSG00000259016	553
ENSG00000198130	1854
ENSG00000223430	412
ENSG00000212551	208
ENSG00000212520	106
ENSG00000160285	3440
ENSG00000255273	357
ENSG00000158480	5118
ENSG00000199784	106
ENSG00000227542	905
ENSG00000229892	346
ENSG00000172375	6744
ENSG00000200121	91
ENSG00000160445	3735
ENSG00000136273	1460
ENSG00000234146	1348
ENSG00000144560	1060
ENSG00000243396	401
ENSG00000263155	3220
ENSG00000221307	100
ENSG00000186652	1633
ENSG00000254647	513
ENSG00000241465	515
ENSG00000233191	289
ENSG00000260356	2311
ENSG00000260518	1341
ENSG00000181126	1195
ENSG00000181704	1892
ENSG00000227081	254
ENSG00000252233	308
ENSG00000224695	523
ENSG00000171928	4214
ENSG00000152056	2244
ENSG00000263437	69
ENSG00000213331	672
ENSG00000267943	4058
ENSG00000264569	302
ENSG00000241347	291
ENSG00000265995	284
ENSG00000253092	197
ENSG00000251495	492
ENSG00000261620	411
ENSG00000253833	390
ENSG00000181333	5325
ENSG00000164307	7213
ENSG00000254069	825
ENSG00000129451	1669
ENSG00000249479	173
ENSG00000268685	236
ENSG00000125618	4315
ENSG00000222921	117
ENSG00000205085	1584
ENSG00000144747	5555
ENSG00000240996	665
ENSG00000266138	278
ENSG00000135346	706
ENSG00000122585	787
ENSG00000120659	1489
ENSG00000183292	540
ENSG00000235527	2449
ENSG00000223738	2204
ENSG00000150086	6225
ENSG00000237633	491
ENSG00000233399	1512
ENSG00000078674	6132
ENSG00000237553	219
ENSG00000162552	1110
ENSG00000146674	2578
ENSG00000268854	373
ENSG00000125384	2669
ENSG00000261252	261
ENSG00000221437	82
ENSG00000249937	868
ENSG00000213484	1188
ENSG00000198015	1983
ENSG00000205018	1810
ENSG00000233385	754
ENSG00000205056	10624
ENSG00000237702	389
ENSG00000237854	675
ENSG00000204717	531
ENSG00000095485	2742
ENSG00000169131	559
ENSG00000223099	81
ENSG00000259826	2233
ENSG00000267083	1297
ENSG00000162078	1303
ENSG00000140623	1597
ENSG00000218476	866
ENSG00000260644	5616
ENSG00000100346	13745
ENSG00000250030	307
ENSG00000214797	2803
ENSG00000229600	482
ENSG00000228361	470
ENSG00000101945	2421
ENSG00000199815	137
ENSG00000059377	5169
ENSG00000264838	89
ENSG00000227624	275
ENSG00000169282	3907
ENSG00000227892	916
ENSG00000250325	878
ENSG00000227325	604
ENSG00000221202	96
ENSG00000258740	676
ENSG00000254576	930
ENSG00000157106	18618
ENSG00000263897	61
ENSG00000169340	1949
ENSG00000176855	1331
ENSG00000243749	919
ENSG00000249785	521
ENSG00000234215	689
ENSG00000241652	293
ENSG00000134201	5190
ENSG00000201274	119
ENSG00000261748	966
ENSG00000269099	134
ENSG00000253078	98
ENSG00000188674	1572
ENSG00000211979	403
ENSG00000207390	97
ENSG00000265979	93
ENSG00000223368	611
ENSG00000198211	2771
ENSG00000270047	486
ENSG00000239091	100
ENSG00000201984	101
ENSG00000212434	198
ENSG00000249226	1025
ENSG00000257662	140
ENSG00000121068	7113
ENSG00000226640	546
ENSG00000237101	1320
ENSG00000220548	1293
ENSG00000233640	498
ENSG00000246067	1141
ENSG00000167554	1849
ENSG00000226054	887
ENSG00000259100	1698
ENSG00000139433	858
ENSG00000243770	276
ENSG00000252188	119
ENSG00000203387	1095
ENSG00000228000	747
ENSG00000228229	382
ENSG00000223864	711
ENSG00000254636	816
ENSG00000237805	657
ENSG00000250731	741
ENSG00000212615	65
ENSG00000236887	433
ENSG00000261360	850
ENSG00000269964	4796
ENSG00000204816	1235
ENSG00000260322	1975
ENSG00000261273	430
ENSG00000260236	1910
ENSG00000005436	2763
ENSG00000226860	325
ENSG00000182973	2435
ENSG00000056998	6611
ENSG00000248268	562
ENSG00000225522	531
ENSG00000255156	108
ENSG00000214108	519
ENSG00000241238	340
ENSG00000265547	515
ENSG00000128487	9225
ENSG00000216077	78
ENSG00000213598	143
ENSG00000242412	252
ENSG00000270588	606
ENSG00000174038	597
ENSG00000200877	107
ENSG00000239861	475
ENSG00000263838	79
ENSG00000261882	152
ENSG00000213366	5893
ENSG00000254046	332
ENSG00000257119	346
ENSG00000270079	779
ENSG00000268473	742
ENSG00000234161	422
ENSG00000164587	702
ENSG00000228360	273
ENSG00000111344	3833
ENSG00000200648	106
ENSG00000269476	1014
ENSG00000226114	360
ENSG00000199295	107
ENSG00000211961	407
ENSG00000171469	1334
ENSG00000265575	76
ENSG00000252955	125
ENSG00000177479	2639
ENSG00000257261	845
ENSG00000188992	1331
ENSG00000183938	365
ENSG00000258118	258
ENSG00000201570	141
ENSG00000249777	389
ENSG00000224944	729
ENSG00000140105	2368
ENSG00000250473	485
ENSG00000099937	2639
ENSG00000236151	532
ENSG00000259675	393
ENSG00000228366	491
ENSG00000255730	1950
ENSG00000174917	1137
ENSG00000135605	4387
ENSG00000237001	1079
ENSG00000145244	9701
ENSG00000223109	60
ENSG00000143515	7625
ENSG00000251488	584
ENSG00000222972	104
ENSG00000224655	461
ENSG00000186090	2198
ENSG00000230122	734
ENSG00000268201	548
ENSG00000132466	8275
ENSG00000259666	332
ENSG00000144029	3081
ENSG00000253793	862
ENSG00000260042	979
ENSG00000171595	2825
ENSG00000225976	239
ENSG00000243877	576
ENSG00000181904	857
ENSG00000266001	93
ENSG00000160211	1918
ENSG00000225209	504
ENSG00000237096	559
ENSG00000224536	338
ENSG00000225950	1879
ENSG00000236785	865
ENSG00000029725	6347
ENSG00000239372	1449
ENSG00000164543	5030
ENSG00000157087	15460
ENSG00000092009	935
ENSG00000200750	110
ENSG00000239083	95
ENSG00000215203	987
ENSG00000118454	5511
ENSG00000236152	306
ENSG00000229256	1091
ENSG00000201370	91
ENSG00000207298	111
ENSG00000252180	87
ENSG00000135525	3472
ENSG00000260375	231
ENSG00000249025	124
ENSG00000227466	453
ENSG00000002079	6299
ENSG00000257341	973
ENSG00000229900	244
ENSG00000240522	790
ENSG00000269091	558
ENSG00000229972	2404
ENSG00000269019	954
ENSG00000266287	81
ENSG00000091157	9221
ENSG00000231694	95
ENSG00000224043	1350
ENSG00000213165	2066
ENSG00000265767	61
ENSG00000197982	1274
ENSG00000173366	3919
ENSG00000196208	13324
ENSG00000250719	393
ENSG00000263987	71
ENSG00000214124	237
ENSG00000265887	68
ENSG00000251398	504
ENSG00000137513	1998
ENSG00000168004	1248
ENSG00000128228	1003
ENSG00000211638	412
ENSG00000229048	221
ENSG00000255193	679
ENSG00000177700	1139
ENSG00000065717	2618
ENSG00000230832	1240
ENSG00000261316	383
ENSG00000261089	1027
ENSG00000258997	2489
ENSG00000237453	341
ENSG00000167767	5964
ENSG00000160214	6343
ENSG00000139832	1512
ENSG00000133835	4667
ENSG00000229606	389
ENSG00000270235	673
ENSG00000199791	106
ENSG00000070087	1315
ENSG00000213261	672
ENSG00000211556	81
ENSG00000178795	3427
ENSG00000263911	296
ENSG00000196946	3752
ENSG00000239819	530
ENSG00000253071	61
ENSG00000265143	254
ENSG00000224365	120
ENSG00000181995	852
ENSG00000236003	649
ENSG00000239198	883
ENSG00000221505	129
ENSG00000258203	525
ENSG00000233485	3103
ENSG00000228242	572
ENSG00000250479	490
ENSG00000204616	1747
ENSG00000236058	548
ENSG00000233583	1149
ENSG00000151135	1262
ENSG00000183682	1685
ENSG00000182315	773
ENSG00000235862	2223
ENSG00000202050	103
ENSG00000218617	384
ENSG00000075239	3538
ENSG00000124780	2180
ENSG00000237328	721
ENSG00000222894	76
ENSG00000152818	11332
ENSG00000175591	2171
ENSG00000196159	13296
ENSG00000231953	418
ENSG00000259035	555
ENSG00000267032	1052
ENSG00000136925	5203
ENSG00000117013	6572
ENSG00000135472	4605
ENSG00000179978	3532
ENSG00000254527	630
ENSG00000157927	3229
ENSG00000267246	822
ENSG00000160336	7922
ENSG00000228837	526
ENSG00000250147	857
ENSG00000225623	510
ENSG00000238601	72
ENSG00000100350	3881
ENSG00000186448	5707
ENSG00000111737	1805
ENSG00000215807	761
ENSG00000261097	1399
ENSG00000211752	385
ENSG00000164197	4056
ENSG00000200388	111
ENSG00000260113	202
ENSG00000262172	441
ENSG00000229406	1168
ENSG00000167645	1449
ENSG00000221230	85
ENSG00000260886	869
ENSG00000241690	1863
ENSG00000225574	947
ENSG00000117560	1884
ENSG00000185290	601
ENSG00000258627	101
ENSG00000266041	59
ENSG00000266216	85
ENSG00000271569	276
ENSG00000247626	3026
ENSG00000241158	1059
ENSG00000271664	1091
ENSG00000229672	753
ENSG00000100012	3007
ENSG00000201618	107
ENSG00000266339	300
ENSG00000099385	1734
ENSG00000269093	551
ENSG00000103534	3717
ENSG00000225605	366
ENSG00000264819	73
ENSG00000234285	960
ENSG00000188186	1071
ENSG00000257022	518
ENSG00000227432	517
ENSG00000269906	667
ENSG00000257721	144
ENSG00000229325	688
ENSG00000228803	1129
ENSG00000163518	3623
ENSG00000266509	106
ENSG00000175691	2324
ENSG00000253686	749
ENSG00000237090	1324
ENSG00000135424	4656
ENSG00000255921	724
ENSG00000164093	2578
ENSG00000144233	4633
ENSG00000152413	4655
ENSG00000201547	107
ENSG00000201752	106
ENSG00000229742	472
ENSG00000187792	4018
ENSG00000212336	119
ENSG00000230442	1016
ENSG00000226401	566
ENSG00000255132	575
ENSG00000248592	1395
ENSG00000263830	264
ENSG00000156928	2972
ENSG00000064313	4954
ENSG00000111206	5332
ENSG00000199592	110
ENSG00000201622	108
ENSG00000230029	1650
ENSG00000232812	523
ENSG00000257831	969
ENSG00000248714	598
ENSG00000264270	564
ENSG00000074370	3461
ENSG00000130545	1041
ENSG00000168385	4810
ENSG00000254693	541
ENSG00000257319	497
ENSG00000230734	467
ENSG00000126217	10445
ENSG00000072736	2912
ENSG00000201448	128
ENSG00000202257	118
ENSG00000135932	1741
ENSG00000252060	107
ENSG00000160766	2268
ENSG00000199938	105
ENSG00000149256	14006
ENSG00000260440	3213
ENSG00000227803	189
ENSG00000233643	505
ENSG00000128652	3880
ENSG00000244169	293
ENSG00000222683	117
ENSG00000157191	2498
ENSG00000263803	259
ENSG00000231435	1033
ENSG00000100564	1145
ENSG00000144485	680
ENSG00000119392	3211
ENSG00000224792	1122
ENSG00000021300	3351
ENSG00000183304	1534
ENSG00000231749	519
ENSG00000221933	1013
ENSG00000235506	711
ENSG00000241597	578
ENSG00000176407	3191
ENSG00000271369	561
ENSG00000203418	256
ENSG00000258154	174
ENSG00000261856	882
ENSG00000208308	127
ENSG00000099256	2350
ENSG00000237461	1537
ENSG00000237466	327
ENSG00000271181	245
ENSG00000163636	1237
ENSG00000230501	1063
ENSG00000132963	1421
ENSG00000213556	264
ENSG00000254860	635
ENSG00000232179	131
ENSG00000228002	3075
ENSG00000167083	496
ENSG00000243995	467
ENSG00000201000	118
ENSG00000225049	187
ENSG00000217482	627
ENSG00000270299	2711
ENSG00000164944	7208
ENSG00000260217	2108
ENSG00000229398	724
ENSG00000103021	5369
ENSG00000207983	94
ENSG00000237257	1024
ENSG00000206698	163
ENSG00000201076	139
ENSG00000169245	1169
ENSG00000227538	1132
ENSG00000225726	486
ENSG00000265460	1044
ENSG00000221245	126
ENSG00000208024	109
ENSG00000266296	1476
ENSG00000238394	106
ENSG00000124233	1263
ENSG00000266859	87
ENSG00000142173	3583
ENSG00000271360	922
ENSG00000237175	381
ENSG00000253047	120
ENSG00000221321	145
ENSG00000246575	699
ENSG00000250923	198
ENSG00000227962	281
ENSG00000260089	839
ENSG00000225417	280
ENSG00000224157	411
ENSG00000223536	987
ENSG00000161649	2576
ENSG00000231405	471
ENSG00000173517	7946
ENSG00000266285	258
ENSG00000262384	481
ENSG00000238458	101
ENSG00000206857	106
ENSG00000226810	1219
ENSG00000268605	559
ENSG00000140678	4997
ENSG00000156113	5995
ENSG00000260548	561
ENSG00000131389	6264
ENSG00000260480	540
ENSG00000218823	4261
ENSG00000101460	1190
ENSG00000223262	113
ENSG00000250855	478
ENSG00000236466	619
ENSG00000141756	4630
ENSG00000147041	4687
ENSG00000168010	2598
ENSG00000270114	695
ENSG00000140254	2426
ENSG00000200170	100
ENSG00000229301	525
ENSG00000164219	3055
ENSG00000160917	1399
ENSG00000204165	958
ENSG00000261845	1189
ENSG00000196335	3421
ENSG00000236663	420
ENSG00000210140	65
ENSG00000163060	1928
ENSG00000252658	89
ENSG00000269699	2386
ENSG00000270879	285
ENSG00000204392	753
ENSG00000228941	2257
ENSG00000270218	588
ENSG00000234456	1494
ENSG00000256427	221
ENSG00000148671	666
ENSG00000241418	510
ENSG00000252193	124
ENSG00000213559	921
ENSG00000265064	62
ENSG00000268743	369
ENSG00000226161	1094
ENSG00000244306	1425
ENSG00000258569	537
ENSG00000146828	5859
ENSG00000230870	1473
ENSG00000023318	4842
ENSG00000179902	1099
ENSG00000163218	2140
ENSG00000237885	408
ENSG00000250025	703
ENSG00000255077	191
ENSG00000153012	6181
ENSG00000113621	1799
ENSG00000155100	2125
ENSG00000108813	1567
ENSG00000207181	134
ENSG00000259479	1035
ENSG00000138778	8622
ENSG00000254534	1661
ENSG00000269172	363
ENSG00000213226	958
ENSG00000248261	323
ENSG00000221649	81
ENSGR0000169084	2393
ENSG00000248719	564
ENSG00000222222	189
ENSG00000206968	164
ENSG00000261717	321
ENSG00000241261	551
ENSG00000258515	476
ENSG00000049769	3930
ENSG00000269397	1499
ENSG00000237806	399
ENSG00000205441	1594
ENSG00000198888	955
ENSG00000230480	348
ENSG00000267767	2071
ENSG00000227012	760
ENSG00000157540	6613
ENSG00000249987	771
ENSG00000241596	560
ENSG00000112799	993
ENSG00000264624	86
ENSG00000185928	2008
ENSG00000240556	213
ENSG00000145780	5810
ENSG00000135709	7509
ENSG00000154479	1849
ENSG00000119681	5406
ENSG00000118513	5257
ENSG00000179151	2324
ENSG00000221466	91
ENSG00000183798	3792
ENSG00000199570	105
ENSG00000168614	8844
ENSG00000257415	1555
ENSG00000185056	2517
ENSG00000204277	2927
ENSG00000263596	121
ENSG00000230490	998
ENSG00000198624	5725
ENSG00000015153	5720
ENSG00000095383	3042
ENSG00000269050	501
ENSG00000116771	2493
ENSG00000189316	1059
ENSG00000171943	932
ENSG00000134253	1743
ENSG00000219453	278
ENSG00000223604	530
ENSG00000184188	1099
ENSG00000266909	552
ENSG00000099985	1058
ENSG00000253202	252
ENSG00000249297	548
ENSG00000235670	482
ENSG00000252965	105
ENSG00000202248	118
ENSG00000238863	90
ENSG00000251883	70
ENSG00000166960	3152
ENSG00000207727	99
ENSG00000214660	1084
ENSG00000237349	282
ENSG00000259488	963
ENSG00000091536	9893
ENSG00000162368	3459
ENSG00000249460	491
ENSG00000198055	2792
ENSG00000199962	108
ENSG00000207720	95
ENSG00000163915	1090
ENSG00000221544	83
ENSG00000180957	3531
ENSG00000168530	998
ENSG00000256316	465
ENSG00000227615	398
ENSG00000180376	5705
ENSG00000265845	311
ENSG00000163781	5361
ENSG00000221332	206
ENSG00000224127	668
ENSG00000258694	346
ENSG00000226489	332
ENSG00000241207	281
ENSG00000236745	641
ENSG00000196564	743
ENSG00000173285	1072
ENSG00000238262	371
ENSG00000270189	1817
ENSG00000226798	788
ENSG00000268088	360
ENSG00000259485	445
ENSG00000137656	2186
ENSG00000253787	451
ENSG00000254655	202
ENSG00000264250	259
ENSG00000219545	2574
ENSG00000171243	2406
ENSG00000255081	469
ENSG00000141753	2830
ENSG00000230163	718
ENSG00000248979	231
ENSG00000259368	480
ENSG00000239246	395
ENSG00000130283	2502
ENSG00000240579	636
ENSG00000227737	917
ENSG00000171443	2320
ENSG00000232938	2381
ENSG00000162241	3000
ENSG00000138136	2117
ENSG00000234111	1016
ENSG00000160856	4559
ENSG00000261695	576
ENSG00000163617	4019
ENSG00000174684	2070
ENSG00000231130	446
ENSG00000138769	2347
ENSG00000169758	3370
ENSG00000236741	450
ENSG00000243424	282
ENSG00000265791	306
ENSG00000178222	1379
ENSG00000218357	993
ENSG00000207129	118
ENSG00000227681	410
ENSG00000238377	71
ENSG00000243981	686
ENSG00000197363	3514
ENSG00000138892	2545
ENSG00000104818	624
ENSG00000265262	357
ENSG00000169976	736
ENSG00000231175	2211
ENSG00000207067	131
ENSG00000238744	103
ENSG00000236306	460
ENSG00000106462	2343
ENSG00000068383	2990
ENSG00000150093	3751
ENSG00000233352	220
ENSG00000227159	1301
ENSG00000239145	103
ENSG00000187323	4673
ENSG00000198681	1705
ENSG00000246877	3185
ENSG00000153157	2763
ENSG00000199251	106
ENSG00000235128	798
ENSG00000199994	124
ENSG00000212199	106
ENSG00000197358	1614
ENSG00000224980	431
ENSG00000249311	1018
ENSG00000077044	11636
ENSG00000223390	760
ENSG00000005102	1202
ENSG00000242735	740
ENSG00000232549	785
ENSG00000257979	213
ENSG00000201596	109
ENSG00000243733	366
ENSG00000228567	1043
ENSG00000202182	101
ENSG00000198542	3118
ENSG00000258198	1048
ENSG00000204183	1732
ENSG00000172201	2341
ENSG00000226972	485
ENSG00000255993	1334
ENSG00000261204	432
ENSG00000255515	573
ENSG00000138722	5371
ENSG00000221994	1705
ENSG00000147475	1812
ENSG00000252201	89
ENSG00000158169	4358
ENSG00000207993	102
ENSG00000007350	3046
ENSG00000259681	429
ENSG00000170920	938
ENSG00000069188	15857
ENSG00000050327	2686
ENSG00000231414	155
ENSG00000223491	281
ENSG00000139624	2550
ENSG00000212387	106
ENSG00000231650	460
ENSG00000202358	106
ENSG00000199631	84
ENSG00000167992	3392
ENSG00000113712	1589
ENSG00000270409	844
ENSG00000253194	468
ENSG00000253461	284
ENSG00000227766	992
ENSG00000264518	93
ENSG00000230439	1669
ENSG00000214407	2047
ENSG00000269242	833
ENSG00000109452	10521
ENSG00000140287	3693
ENSG00000229269	214
ENSGR0000169093	3319
ENSG00000196890	451
ENSG00000124920	11954
ENSG00000243276	1006
ENSG00000269796	178
ENSG00000237630	220
ENSG00000237987	453
ENSG00000248761	719
ENSG00000259918	342
ENSG00000102409	2161
ENSG00000198952	5187
ENSG00000247675	1940
ENSG00000116288	1009
ENSG00000242836	780
ENSG00000073060	2291
ENSG00000229403	586
ENSG00000078804	3819
ENSG00000174807	2557
ENSG00000050767	2879
ENSG00000133317	2829
ENSG00000248760	556
ENSG00000266187	291
ENSG00000257605	635
ENSG00000265785	402
ENSG00000171960	1327
ENSG00000250539	1422
ENSG00000134470	1034
ENSG00000211847	65
ENSG00000236155	1419
ENSG00000216835	1190
ENSG00000150637	1491
ENSG00000259978	234
ENSG00000252224	125
ENSG00000105778	14172
ENSG00000202356	97
ENSG00000171433	929
ENSG00000212184	104
ENSG00000207101	101
ENSG00000236529	384
ENSG00000139405	2953
ENSG00000255268	601
ENSG00000241907	354
ENSG00000213218	1644
ENSG00000270423	417
ENSG00000111850	4611
ENSG00000265655	83
ENSG00000238748	105
ENSG00000228171	248
ENSG00000249484	675
ENSG00000136574	3360
ENSG00000259188	517
ENSG00000214702	457
ENSG00000240973	1255
ENSG00000265706	77
ENSG00000176410	1182
ENSG00000264382	53
ENSG00000260622	496
ENSG00000249452	431
ENSG00000230510	4524
ENSG00000268870	613
ENSG00000056736	2092
ENSG00000204872	678
ENSG00000258346	595
ENSG00000188107	14282
ENSG00000249624	1417
ENSG00000104325	1086
ENSG00000089154	9037
ENSG00000270294	599
ENSG00000206692	116
ENSG00000203572	171
ENSG00000220378	1397
ENSG00000254102	2487
ENSG00000136274	1008
ENSG00000214074	404
ENSG00000131080	1007
ENSG00000227959	902
ENSG00000201660	129
ENSG00000236519	1029
ENSG00000114270	8591
ENSG00000244342	2590
ENSG00000235997	2950
ENSG00000168152	3227
ENSG00000232271	379
ENSG00000214049	492
ENSG00000253637	303
ENSG00000236137	2146
ENSG00000221578	86
ENSG00000168818	2474
ENSG00000233454	273
ENSG00000204241	2165
ENSG00000231575	444
ENSG00000207752	70
ENSG00000267730	644
ENSG00000227040	566
ENSG00000047579	2073
ENSG00000248569	935
ENSG00000123552	6005
ENSG00000241755	407
ENSG00000222496	319
ENSG00000233364	172
ENSG00000225808	315
ENSG00000113248	2652
ENSG00000230458	143
ENSG00000116017	5796
ENSG00000240167	570
ENSG00000268636	358
ENSG00000155876	1647
ENSG00000220831	332
ENSG00000250072	747
ENSG00000249849	428
ENSG00000169598	4950
ENSG00000243939	415
ENSG00000136682	4779
ENSG00000238625	101
ENSG00000242676	2462
ENSG00000223947	3483
ENSG00000085365	9334
ENSG00000075624	1547
ENSG00000155275	7152
ENSG00000264449	368
ENSG00000252780	105
ENSG00000251090	918
ENSG00000200898	106
ENSG00000177406	4680
ENSG00000226632	444
ENSG00000265039	87
ENSG00000261247	1969
ENSG00000114491	2352
ENSG00000171557	2325
ENSG00000201790	114
ENSG00000166813	4387
ENSG00000252000	121
ENSG00000260001	992
ENSG00000260932	194
ENSG00000255181	605
ENSG00000141219	989
ENSG00000188486	1371
ENSG00000261658	3265
ENSG00000271081	303
ENSG00000238697	101
ENSG00000132530	1633
ENSG00000124802	1372
ENSG00000137868	3066
ENSG00000242882	892
ENSG00000269948	3109
ENSG00000257033	346
ENSG00000179406	4966
ENSG00000258916	4962
ENSG00000107745	3665
ENSG00000168488	7898
ENSG00000127249	4889
ENSG00000161860	1535
ENSG00000236017	585
ENSG00000267012	533
ENSG00000105520	3057
ENSG00000235899	563
ENSG00000023516	9900
ENSG00000225093	1211
ENSG00000232129	192
ENSG00000268814	626
ENSG00000238046	194
ENSG00000201822	91
ENSG00000135070	1260
ENSG00000260844	711
ENSG00000231271	286
ENSG00000216047	92
ENSG00000214944	11551
ENSG00000227674	1872
ENSG00000224221	729
ENSG00000250634	577
ENSG00000243980	288
ENSG00000136100	4733
ENSG00000142655	2914
ENSG00000249555	950
ENSG00000182404	1903
ENSG00000076826	4356
ENSG00000254788	475
ENSG00000227581	621
ENSG00000183598	410
ENSG00000250050	1344
ENSG00000263511	89
ENSG00000241587	295
ENSG00000187118	707
ENSG00000178115	2304
ENSG00000238417	61
ENSG00000211871	65
ENSG00000243154	767
ENSG00000225339	1228
ENSG00000201492	117
ENSG00000241251	476
ENSG00000184260	436
ENSG00000182531	1098
ENSG00000206887	103
ENSG00000264953	86
ENSG00000263126	3906
ENSG00000242247	3056
ENSG00000230361	904
ENSG00000252918	83
ENSG00000264760	60
ENSG00000175445	3532
ENSG00000266692	54
ENSG00000123388	2037
ENSG00000268020	124
ENSG00000143183	1712
ENSG00000228703	685
ENSG00000270399	137
ENSG00000179840	1821
ENSG00000253141	449
ENSG00000255474	1245
ENSG00000224155	848
ENSG00000166851	1832
ENSG00000101000	1344
ENSG00000116721	3093
ENSG00000261602	573
ENSG00000172409	1631
ENSG00000262112	536
ENSG00000260070	704
ENSG00000130962	6504
ENSG00000133858	8182
ENSG00000101150	5752
ENSG00000244247	617
ENSG00000236708	980
ENSG00000206760	150
ENSG00000168137	10218
ENSG00000123268	2226
ENSG00000257847	272
ENSG00000163009	1893
ENSG00000228134	557
ENSG00000202220	93
ENSG00000254414	843
ENSG00000230960	1327
ENSG00000149600	1336
ENSG00000270927	492
ENSG00000229925	286
ENSG00000138802	5244
ENSG00000100196	965
ENSG00000232234	398
ENSG00000235742	177
ENSG00000143228	2282
ENSG00000213210	329
ENSG00000251438	538
ENSG00000220132	742
ENSG00000204818	1319
ENSG00000261703	350
ENSG00000161016	1053
ENSG00000224321	489
ENSG00000223053	134
ENSG00000231255	267
ENSG00000270372	109
ENSG00000271047	143
ENSG00000108848	2416
ENSG00000224607	318
ENSG00000259315	535
ENSG00000101493	12124
ENSG00000265471	78
ENSG00000211990	117
ENSG00000224452	400
ENSG00000115514	732
ENSG00000225708	742
ENSG00000267486	417
ENSG00000262187	119
ENSG00000233368	556
ENSG00000240116	248
ENSG00000100490	2671
ENSG00000221250	82
ENSG00000258301	868
ENSG00000265664	227
ENSG00000256400	95
ENSG00000185960	3778
ENSG00000129028	534
ENSG00000230684	264
ENSG00000242152	945
ENSG00000254492	175
ENSG00000256134	719
ENSG00000223703	2389
ENSG00000267101	466
ENSG00000164300	1608
ENSG00000268601	554
ENSG00000243268	1282
ENSG00000224072	2295
ENSG00000160994	1725
ENSG00000151876	2093
ENSG00000234172	470
ENSG00000184363	2940
ENSG00000142182	1451
ENSG00000200437	106
ENSG00000216649	515
ENSG00000164284	4105
ENSG00000258233	2935
ENSG00000156172	3328
ENSG00000265381	87
ENSG00000238629	101
ENSG00000255949	468
ENSG00000250673	394
ENSG00000152042	4585
ENSG00000088179	10611
ENSG00000226756	625
ENSG00000005075	605
ENSG00000253454	343
ENSG00000218872	337
ENSG00000258737	264
ENSG00000225549	1373
ENSG00000201077	106
ENSG00000212395	98
ENSG00000250472	880
ENSG00000227862	969
ENSG00000225610	778
ENSG00000260255	1092
ENSG00000203809	572
ENSG00000166510	1665
ENSG00000252294	106
ENSG00000248180	994
ENSG00000157856	2396
ENSG00000250015	204
ENSG00000253250	888
ENSG00000228347	524
ENSG00000237861	1033
ENSG00000258545	1913
ENSG00000218359	271
ENSG00000125730	5456
ENSG00000136936	1898
ENSG00000265251	66
ENSG00000238290	2041
ENSG00000268058	555
ENSG00000227397	189
ENSG00000226449	1579
ENSG00000251301	921
ENSG00000248400	1092
ENSG00000112679	1231
ENSG00000261405	504
ENSG00000227610	455
ENSG00000259419	874
ENSG00000210181	125
ENSG00000168243	5234
ENSG00000234139	354
ENSG00000214243	496
ENSG00000202250	106
ENSG00000184788	2493
ENSG00000197273	566
ENSG00000186063	891
ENSG00000271314	455
ENSG00000108861	2184
ENSG00000228979	491
ENSG00000136002	8083
ENSG00000268098	112
ENSG00000265137	76
ENSG00000253994	500
ENSG00000165915	5562
ENSG00000117419	2184
ENSG00000229032	341
ENSG00000213716	405
ENSG00000261467	2775
ENSG00000206977	139
ENSG00000160223	8954
ENSG00000170412	3883
ENSG00000122958	1870
ENSG00000238742	74
ENSG00000198774	1824
ENSG00000269898	496
ENSG00000130827	6285
ENSG00000263981	88
ENSG00000270839	597
ENSG00000262081	1240
ENSG00000266967	1444
ENSG00000204704	1027
ENSG00000257779	326
ENSG00000224837	521
ENSG00000207780	93
ENSG00000232415	530
ENSG00000188735	12239
ENSG00000261452	1943
ENSG00000229646	144
ENSG00000084734	3357
ENSG00000259532	470
ENSG00000181408	1309
ENSG00000110042	5175
ENSG00000259340	136
ENSG00000251283	792
ENSG00000199038	109
ENSG00000182324	4958
ENSG00000266203	58
ENSG00000113716	5379
ENSG00000255313	484
ENSG00000172543	1576
ENSG00000156253	1458
ENSG00000188488	3737
ENSG00000230301	1112
ENSG00000137642	11838
ENSG00000142698	2280
ENSG00000183434	1679
ENSG00000182329	6419
ENSG00000264066	894
ENSG00000227645	673
ENSG00000137731	2338
ENSG00000268170	197
ENSG00000147044	3956
ENSG00000230338	477
ENSG00000251267	1061
ENSG00000250760	1066
ENSG00000205716	398
ENSG00000252078	71
ENSG00000201309	101
ENSG00000230903	1228
ENSG00000263848	85
ENSG00000265561	49
ENSG00000257230	580
ENSG00000144230	3442
ENSG00000197644	198
ENSG00000267159	328
ENSG00000171446	1604
ENSG00000213287	408
ENSG00000133639	502
ENSG00000270909	1807
ENSG00000255311	1375
ENSG00000207141	100
ENSG00000221407	95
ENSG00000159267	4893
ENSG00000234386	1028
ENSG00000163378	5163
ENSG00000251078	909
ENSG00000085999	2832
ENSG00000238543	102
ENSG00000230045	1397
ENSG00000259925	1819
ENSG00000124222	4450
ENSG00000198835	2241
ENSG00000213854	899
ENSG00000224806	511
ENSG00000227844	1976
ENSG00000136114	2957
ENSG00000259928	1519
ENSG00000145375	3243
ENSG00000156170	3289
ENSG00000212001	111
ENSG00000231999	1367
ENSG00000227337	470
ENSG00000229101	343
ENSG00000101180	1655
ENSG00000249328	2182
ENSG00000105518	446
ENSG00000106483	843
ENSG00000221046	125
ENSG00000263363	83
ENSG00000263524	61
ENSG00000248826	842
ENSG00000156050	2295
ENSG00000232332	435
ENSG00000174137	2700
ENSG00000253017	76
ENSG00000259749	752
ENSG00000259002	543
ENSG00000103653	4181
ENSG00000229931	933
ENSG00000171462	2014
ENSG00000143248	1351
ENSG00000006377	2287
ENSG00000143319	1651
ENSG00000155636	1752
ENSG00000229280	371
ENSG00000202273	102
ENSG00000154316	1606
ENSG00000256994	995
ENSG00000211996	82
ENSG00000166073	1029
ENSG00000199591	106
ENSG00000154118	5682
ENSG00000263754	76
ENSG00000250544	449
ENSG00000229457	485
ENSG00000176988	722
ENSG00000207607	89
ENSG00000213965	2964
ENSG00000260233	613
ENSG00000241471	416
ENSG00000212493	67
ENSG00000249170	977
ENSG00000146205	6898
ENSG00000255188	126
ENSG00000259821	741
ENSG00000156411	2104
ENSG00000228594	2084
ENSG00000225583	327
ENSG00000126860	3315
ENSG00000234770	742
ENSG00000215193	1786
ENSG00000204362	4673
ENSG00000064726	2984
ENSG00000255173	173
ENSG00000250194	315
ENSG00000223646	1180
ENSG00000167968	1357
ENSG00000265667	97
ENSG00000255526	673
ENSG00000200980	118
ENSG00000227473	900
ENSG00000242507	1723
ENSG00000239127	95
ENSG00000232054	892
ENSG00000064601	2799
ENSG00000233575	323
ENSG00000132153	4653
ENSG00000268643	629
ENSG00000253899	1282
ENSG00000066135	4494
ENSG00000233337	523
ENSG00000049860	2485
ENSG00000235597	1470
ENSG00000232633	4751
ENSG00000122390	6051
ENSG00000128791	5926
ENSG00000140274	1718
ENSG00000112365	5512
ENSG00000251011	2793
ENSG00000250412	517
ENSG00000088387	7871
ENSG00000237850	1361
ENSG00000200735	96
ENSG00000203772	3170
ENSG00000145491	1316
ENSG00000254564	122
ENSG00000138623	3679
ENSG00000167798	4348
ENSG00000198444	1700
ENSG00000216687	1414
ENSG00000251974	129
ENSG00000174442	2946
ENSG00000173369	1545
ENSG00000155366	1354
ENSG00000236753	1696
ENSG00000262560	2309
ENSG00000267346	461
ENSG00000252428	118
ENSG00000251148	560
ENSG00000243929	293
ENSG00000232281	599
ENSG00000135972	2029
ENSG00000174669	2496
ENSG00000228423	351
ENSG00000255466	919
ENSG00000219797	496
ENSG00000259490	357
ENSG00000104953	3267
ENSG00000252641	99
ENSG00000174677	906
ENSG00000249680	1319
ENSG00000269966	725
ENSG00000126768	1675
ENSG00000249915	5125
ENSG00000213169	761
ENSG00000205275	6844
ENSG00000145217	5333
ENSG00000173357	1095
ENSG00000212172	160
ENSG00000152670	3836
ENSG00000199366	105
ENSG00000124140	5963
ENSG00000163263	383
ENSG00000269907	329
ENSG00000144749	6966
ENSG00000232424	558
ENSG00000176515	3432
ENSG00000251816	42
ENSG00000212952	1710
ENSG00000223214	82
ENSG00000251564	392
ENSG00000215043	912
ENSG00000261811	269
ENSG00000232325	757
ENSG00000048462	507
ENSG00000227230	692
ENSG00000269237	467
ENSG00000172336	481
ENSG00000169442	378
ENSG00000237790	594
ENSG00000173706	10678
ENSG00000185313	6391
ENSG00000229729	1406
ENSG00000239763	471
ENSG00000182415	2366
ENSG00000240747	1495
ENSG00000181722	5341
ENSG00000183791	1876
ENSG00000269185	266
ENSG00000168824	5698
ENSG00000238034	567
ENSG00000196085	227
ENSG00000253717	474
ENSG00000244389	294
ENSG00000244585	491
ENSG00000226547	582
ENSG00000120370	3709
ENSG00000164808	3466
ENSG00000186642	3061
ENSG00000214491	2255
ENSG00000119977	2771
ENSG00000197376	1078
ENSG00000271171	456
ENSG00000254021	487
ENSG00000265650	77
ENSG00000234324	552
ENSG00000128203	3353
ENSG00000140406	3047
ENSG00000157445	4955
ENSG00000266577	282
ENSG00000006071	5455
ENSG00000203761	1578
ENSG00000149792	5927
ENSG00000221007	151
ENSG00000207259	91
ENSG00000234361	679
ENSG00000255418	678
ENSG00000073150	2286
ENSG00000231165	292
ENSG00000240529	594
ENSG00000232093	820
ENSG00000271146	394
ENSG00000268864	1224
ENSG00000185532	6447
ENSG00000270544	439
ENSG00000233849	285
ENSG00000167476	1418
ENSG00000159186	635
ENSG00000244214	558
ENSG00000204536	3091
ENSG00000266270	69
ENSG00000262209	4723
ENSG00000252048	170
ENSG00000234404	568
ENSG00000263307	560
ENSG00000225964	502
ENSG00000215388	1113
ENSG00000251381	602
ENSG00000238438	102
ENSG00000270690	483
ENSG00000159917	941
ENSG00000251630	185
ENSG00000159208	1500
ENSG00000199986	106
ENSG00000238058	308
ENSG00000253020	279
ENSG00000255776	900
ENSG00000251270	389
ENSG00000131746	3542
ENSG00000235903	743
ENSG00000172799	503
ENSG00000233446	1234
ENSG00000227878	651
ENSG00000269981	283
ENSG00000233868	389
ENSG00000236420	675
ENSG00000253460	358
ENSG00000225508	284
ENSG00000236583	1411
ENSG00000257527	542
ENSG00000254286	678
ENSG00000222859	299
ENSG00000266180	66
ENSG00000178965	7835
ENSG00000175305	1843
ENSG00000235929	504
ENSG00000223223	326
ENSG00000236556	334
ENSG00000253315	570
ENSG00000152795	1842
ENSG00000218803	653
ENSG00000264966	84
ENSG00000255959	499
ENSG00000255989	708
ENSG00000225507	525
ENSG00000116668	3313
ENSG00000232746	632
ENSG00000211538	83
ENSG00000267557	571
ENSG00000166183	2084
ENSG00000202498	91
ENSG00000228909	610
ENSG00000264056	78
ENSG00000197019	2112
ENSG00000204347	1802
ENSG00000073861	2427
ENSG00000233843	321
ENSG00000149547	2785
ENSG00000123154	1856
ENSG00000101972	4560
ENSG00000122550	4452
ENSG00000104450	3905
ENSG00000165186	12575
ENSG00000254129	716
ENSG00000236977	1063
ENSG00000222299	72
ENSG00000263503	1471
ENSG00000254215	266
ENSG00000099139	9490
ENSG00000231083	562
ENSG00000260659	401
ENSG00000224259	1110
ENSG00000265081	280
ENSG00000175467	3608
ENSG00000129317	3377
ENSG00000186326	2893
ENSG00000101849	6056
ENSG00000206817	99
ENSG00000011021	6333
ENSG00000205176	7031
ENSG00000117322	4295
ENSG00000241095	1506
ENSG00000158882	4396
ENSG00000151360	1619
ENSG00000206861	85
ENSG00000221565	88
ENSG00000242612	3187
ENSG00000135912	5704
ENSG00000256852	988
ENSG00000231465	256
ENSG00000162104	5748
ENSG00000244041	3192
ENSG00000141965	3843
ENSG00000065361	9176
ENSG00000205883	232
ENSG00000235313	354
ENSG00000017797	3937
ENSG00000160908	501
ENSG00000237926	813
ENSG00000216054	89
ENSG00000203878	1793
ENSG00000238676	97
ENSG00000182217	1694
ENSG00000145555	8567
ENSG00000242028	1376
ENSG00000264321	102
ENSG00000253063	89
ENSG00000252357	133
ENSG00000115850	7406
[truncated: 55,280 more rows]
