# Supplementary material for: RNA-seq reveals more consistent reference genes for gene expression studies in human non-melanoma skin cancers
Source: PeerJ. 2017 Aug 21;5:e3631. doi: 10.7717/peerj.3631 (PMC5572537; doi:10.7717/peerj.3631)
Supplement: Table S4 — Candidates genes (selected) and annotated reference genes (ref) are noted accordingly. [file peerj-05-3631-s006.xlsx]

## Sheet: Sheet1
Table 4 : Metrics
gene	CoV	MFC	Mean TPM	BCV	CoV X MFC	Reference
61E3.4	0.541986	13.1334	7.51089	0.0412059	7.11815	no
A-575C2.4	0.647218	16.3917	0.11104	9.50554e-05	10.609	no
A1BG-AS1	0.486085	49.5429	0.626215	0.0674257	24.0821	no
A2M	0.537264	8.6176	82.9581	0.0421178	4.62992	no
A2M-AS1	1.03211	17.8819	1.13468	0.0160532	18.4561	no
A2ML1	0.534651	8.43444	94.6548	0.0921715	4.50948	no
A4GALT	0.471554	6.33662	24.9367	0.0559605	2.98806	no
AAAS	0.338869	4.0253	26.6758	0.00694308	1.36405	no
AACS	0.484317	6.55165	18.3635	0.023395	3.17308	no
AACSP1	1.09047	57.7086	2.32696	0.272645	62.9292	no
AADAC	0.917789	18.8158	9.61069	0.270442	17.2689	no
AADACL2	0.562841	12.5029	73.1578	0.027065	7.03712	no
AADAT	0.686449	14.9326	3.0496	0.100343	10.2505	no
AAED1	0.303986	2.78928	8.23683	0.0114924	0.847901	no
AAGAB	0.184223	2.36057	61.9258	0.00323124	0.434873	no
AAK1	0.33385	8.98334	6.24425	0.0163033	2.99909	no
AAMDC	0.685485	9.18696	4.28645	0.0253482	6.29752	no
AAMP	0.248993	3.26984	68.3041	0.00200629	0.814166	no
AAR2	0.233068	2.83111	28.3281	0.00212116	0.65984	no
AARS	0.347857	3.85341	40.6189	0.0076624	1.34043	no
AARS2	0.55121	10.9863	10.5793	0.0293111	6.05575	no
AARSD1	0.498763	33.1297	2.54988	0.0879896	16.5239	no
AASDH	0.513966	9.85369	7.86473	0.00638288	5.06447	no
AASDHPPT	0.211192	2.53897	9.01704	0.00363506	0.536209	no
AASS	0.479312	18.0379	14.5272	0.0297864	8.64576	no
AATF	0.209878	2.35402	21.1174	0.00296599	0.494056	no
AATK	0.425179	11.2287	0.713149	0.0310925	4.77421	no
ABAT	0.480779	10.0342	6.57338	0.0401117	4.82424	no
ABC7-42389800N19.1	0.531313	29.408	13.3242	0.0796589	15.6248	no
ABCA1	0.950935	20.248	21.8251	0.0140883	19.2545	no
ABCA10	2.01489	388.762	6.16741	0.0913901	783.312	no
ABCA11P	0.74275	46.8139	1.3498	0.0736809	34.771	no
ABCA12	0.337674	3.70975	66.3843	0.0121215	1.25269	no
ABCA13	1.50649	76.8898	0.783848	0.758866	115.834	no
ABCA17P	0.932697	82.1469	0.31988	0.325021	76.6181	no
ABCA2	0.66951	34.7342	7.58497	0.100117	23.2549	no
ABCA3	0.735782	17.2463	2.78448	0.200311	12.6895	no
ABCA4	0.918674	62.2332	1.22585	0.620088	57.172	no
ABCA5	1.12019	54.1271	18.0643	0.0245554	60.6327	no
ABCA6	2.09862	196.965	11.1773	0.074333	413.354	no
ABCA7	0.608212	23.937	8.84704	0.0716605	14.5588	no
ABCA8	1.65287	122.16	8.76487	0.126904	201.915	no
ABCA9	1.78604	494.027	4.06497	0.177572	882.35	no
ABCB1	0.527973	15.1012	2.14183	0.0452813	7.97306	no
ABCB10	0.294451	4.86274	16.4488	0.00632742	1.43184	no
ABCB11	2.419	548.143	0.616013	1.26676	1325.96	no
ABCB4	0.894512	15.89	1.32678	0.0516707	14.2138	no
ABCB6	0.590994	103.274	1.14164	0.137807	61.0342	no
ABCB7	0.352202	3.70948	22.4288	0.00389005	1.30649	no
ABCB8	0.40661	7.01062	12.1913	0.00539932	2.85059	no
ABCB9	0.484636	15.1762	2.13586	0.0395663	7.35491	no
ABCC1	0.494098	7.28278	23.9092	0.015144	3.5984	no
ABCC10	0.373448	8.08803	8.13805	0.0127137	3.02046	no
ABCC11	0.690507	17.8757	0.434841	0.161877	12.3433	no
ABCC2	0.470399	32.9913	1.35746	0.0652825	15.519	no
ABCC3	0.402653	4.66345	7.99199	0.0320925	1.87775	no
ABCC4	0.50778	7.72417	5.80691	0.0157258	3.92218	no
ABCC5	0.540065	27.9058	21.181	0.077559	15.0709	no
ABCC6	0.495976	8.30379	0.34232	0.0394949	4.11848	no
ABCC9	1.3402	34.9557	7.47541	0.0975506	46.8477	no
ABCD1	0.55266	9.98833	7.59313	0.0318157	5.52015	no
ABCD3	0.42139	5.32789	22.8532	0.00880409	2.24512	no
ABCD4	0.314556	5.38293	17.8216	0.00902482	1.69323	no
ABCE1	0.233723	3.2	81.6805	0.00370592	0.747913	no
ABCF1	0.295446	3.98745	31.3922	0.00252079	1.17808	no
ABCF2	0.25803	2.8576	36.779	0.00193908	0.737346	no
ABCF3	0.266906	3.32049	24.7544	0.00307445	0.886259	no
ABCG1	0.242928	3.0069	12.0528	0.00757938	0.730461	no
ABCG2	0.47907	10.1473	1.27703	0.0405758	4.86125	no
ABCG4	0.803334	176.975	4.23626	0.143009	142.17	no
ABHD1	1.49103	43.8312	0.640927	0.126155	65.3538	no
ABHD10	0.374373	5.08916	43.2291	0.0130377	1.90524	no
ABHD11	0.853541	13.185	15.1564	0.0432424	11.254	no
ABHD12	0.317817	3.782	48.2341	0.00654585	1.20198	no
ABHD12B	0.496314	9.54374	11.3053	0.0508828	4.7367	no
ABHD13	0.278898	2.83432	10.9548	0.00412268	0.790485	no
ABHD14A	0.326228	3.15065	4.37228	0.0174107	1.02783	no
ABHD14B	0.355802	4.36376	23.7032	0.0112994	1.55263	no
ABHD15	0.366017	3.86946	6.51065	0.0117264	1.41629	no
ABHD16A	0.445429	10.1212	1.32753	0.0280425	4.50827	no
ABHD16B	0.496819	14.7955	4.71686	0.0242203	7.35067	no
ABHD17A	0.376864	5.53619	122.736	0.00474635	2.08639	no
ABHD17B	0.299906	3.58661	23.274	0.00967936	1.07565	no
ABHD17C	0.351826	5.40428	128.155	0.00618638	1.90137	no
ABHD2	0.337171	6.10853	20.3285	0.011761	2.05962	no
ABHD3	0.347734	4.77065	5.39613	0.0134919	1.65892	no
ABHD4	0.357492	4.04993	39.7261	0.00706766	1.44782	no
ABHD5	0.622994	10.5725	77.5082	0.0401558	6.58659	no
ABHD6	0.378318	3.34206	12.0102	0.0102052	1.26436	no
ABHD8	0.434823	10.5523	13.933	0.0157819	4.58839	no
ABI1	0.146745	1.96201	61.1365	0.00163211	0.287915	no
ABI2	0.501103	10.5573	15.7798	0.0192524	5.29031	no
ABI3	0.594929	11.6681	6.1874	0.0636438	6.94166	no
ABI3BP	3.04007	1482.58	16.0584	1.04449	4507.13	no
ABL1	0.30136	4.48035	25.3616	0.00563609	1.3502	no
ABL2	0.51133	10.0467	20.3854	0.0355331	5.13719	no
ABLIM1	0.275331	4.76151	386.222	0.00672581	1.31099	no
ABLIM2	0.537546	12.469	4.47299	0.0457309	6.70268	no
ABLIM3	0.829866	17.8728	3.32751	0.0712455	14.832	no
ABP1	0.780392	25.0489	3.20682	0.249354	19.548	no
ABR	0.307938	3.18968	37.1084	0.00549497	0.982223	no
ABRACL	0.370439	7.35244	42.7459	0.0142176	2.72363	no
ABT1	0.243074	2.56924	24.7549	0.00522615	0.624518	no
ABTB1	0.358268	4.27685	17.2571	0.00674671	1.53226	no
ABTB2	0.549023	9.43792	7.29865	0.0474315	5.18163	no
AC000068.5	0.647102	16.2412	0.587441	0.0209545	10.5097	no
AC000123.4	0.521738	8.81024	17.878	0.0177132	4.59664	no
AC002055.4	0.479178	12.1097	5.18498	0.0278451	5.8027	no
AC002117.1	1.81211	121.369	2.37911	0.0363131	219.935	no
AC002310.12	0.554318	10.0787	1.68768	0.0646541	5.58682	no
AC002398.11	0.376025	6.24947	0.601888	0.0200334	2.34996	no
AC002467.7	0.39635	7.50524	2.30718	0.028787	2.9747	no
AC003075.4	0.797182	22.0685	1.58508	0.142557	17.5926	no
AC003102.3	0.542689	17.9679	0.305541	0.0634201	9.75098	no
AC003665.1	0.651431	7.38855	3.00956	0.0267262	4.81313	no
AC003986.6	1.4017	153.332	0.74107	0.0994067	214.925	no
AC004041.2	1.20011	37.5667	2.49691	0.0370678	45.084	no
AC004057.1	0.436656	5.47987	7.38652	0.0319927	2.39282	no
AC004069.2	0.854485	42.1502	0.890957	0.059449	36.0167	no
AC004152.5	0.631598	81.4974	5.11662	0.0763772	51.4736	no
AC004166.6	0.394873	14.0501	0.440491	0.0143106	5.54799	no
AC004166.7	0.320036	11.1462	7.0116	0.0239409	3.56718	no
AC004231.2	0.766354	18.8706	1.23323	0.0727683	14.4616	no
AC004257.3	0.574316	10.956	5.29365	0.0334943	6.29222	no
AC004381.6	0.376045	7.82111	3.17813	0.0266268	2.94109	no
AC004447.2	0.477698	16.6328	3.5647	0.0397401	7.94546	no
AC004463.6	0.45415	6.30786	1.25328	0.0292886	2.86471	no
AC004466.1	0.557747	14.7182	0.307146	0.0278496	8.20904	no
AC004471.9	1.16746	49.2286	1.22628	0.0596032	57.4722	no
AC004490.1	0.602698	10.4091	0.269659	0.096933	6.27354	no
AC004540.5	0.694823	17.7456	0.451617	0.0622701	12.3301	no
AC004696.2	0.7859	14.2998	12.3524	0.20441	11.2382	no
AC004791.2	1.24244	48.6523	2.17198	0.214799	60.4475	no
AC004797.1	0.260931	2.65187	1.24923	0.00343393	0.691953	no
AC004837.5	1.12836	45.5135	1.3363	0.0487852	51.3556	no
AC004840.9	0.5142	22.54	2.74166	0.102177	11.5901	no
AC004893.11	0.793	40.3119	2.84291	0.0478754	31.9674	no
AC004951.5	0.67097	14.4078	1.60963	0.0873088	9.66721	no
AC004967.11	1.0508	106.184	1.2491	0.0500876	111.578	no
AC004967.7	0.394155	3.79121	19.0101	0.0237795	1.49432	no
AC004967.8	0.35334	3.53915	10.6409	0.0199258	1.25052	no
AC004980.7	0.668142	14.0474	8.78983	0.0176684	9.38564	no
AC005003.1	0.473611	11.3114	0.882407	0.0325047	5.35721	no
AC005042.4	1.26463	30.5831	0.734753	0.0247713	38.6764	no
AC005076.5	0.562384	8.01129	1.98051	0.015868	4.50543	no
AC005083.1	0.5003	5.91983	1.34961	0.0660352	2.96169	no
AC005104.3	0.360934	21.9065	4.59202	0.0368901	7.90681	no
AC005154.5	0.959135	29.6199	0.749628	0.0145651	28.4095	no
AC005154.6	0.855562	52.5462	12.9706	0.0336532	44.9565	no
AC005154.7	0.862826	156.506	1.57773	0.0442142	135.037	no
AC005154.8	1.29595	67.1866	2.01551	0.0983997	87.0703	no
AC005162.5	0.755196	31.0508	2.10273	0.183047	23.4494	no
AC005224.2	0.482616	18.7833	0.748614	0.0306453	9.06515	no
AC005229.1	0.649024	9.4177	16.2508	0.0572611	6.11231	no
AC005253.2	0.386708	18.4931	1.0497	0.0299005	7.15142	no
AC005264.2	0.492054	16.0683	0.559596	0.0652076	7.90648	no
AC005306.3	0.65461	84.5469	2.83764	0.103104	55.3452	no
AC005387.2	0.538347	19.3551	1.11222	0.0167874	10.4198	no
AC005387.3	0.54748	17.4052	1.02795	0.0537723	9.52902	no
AC005517.3	1.216	95.3616	2.27828	0.061172	115.96	no
AC005562.1	0.359323	6.07846	2.23565	0.0172321	2.18413	no
AC005594.3	0.435505	48.8904	0.440687	0.0404548	21.292	no
AC005682.5	0.515087	14.0735	4.9288	0.0353398	7.24909	no
AC005682.6	0.714072	15.2616	1.62876	0.0401479	10.8979	no
AC005785.2	0.665177	32.6348	8.52637	0.192118	21.7079	no
AC005789.11	0.368587	5.92143	0.980722	0.0164505	2.18256	no
AC005841.1	0.458248	43.5896	2.69129	0.0885507	19.9748	no
AC005895.3	1.37028	67.9859	0.645585	0.137316	93.1597	no
AC005943.5	0.957745	71.4438	0.972103	0.283388	68.425	no
AC006042.6	0.45589	35.8983	3.82401	0.0734897	16.3657	no
AC006042.8	1.74763	428.527	2.49068	0.239398	748.904	no
AC006116.20	0.705517	10.1697	9.96687	0.0748115	7.17488	no
AC006126.4	0.577095	20.1334	2.31187	0.0349629	11.6189	no
AC006128.2	0.54171	83.6283	2.21986	0.0928946	45.3023	no
AC006129.1	0.550198	12.301	1.11451	0.0317639	6.76799	no
AC006129.4	0.669355	14.1331	3.21053	0.155146	9.46003	no
AC006262.4	0.827827	26.4601	15.4311	0.0872729	21.9044	no
AC006262.5	0.792564	41.1038	25.296	0.331396	32.5774	no
AC006262.6	0.611471	35.1473	8.97192	0.11363	21.4916	no
AC006273.5	1.04241	69.9284	0.834038	0.309711	72.8944	no
AC006277.2	0.558253	30.5803	0.608386	0.0414422	17.0716	no
AC006296.3	1.18849	18.8484	0.440257	0.0340128	22.4011	no
AC006372.4	0.945042	35.0686	0.361065	0.245104	33.1413	no
AC006378.2	0.910234	53.0903	1.45576	0.040562	48.3246	no
AC006465.3	0.455043	4.40153	6.91782	0.021037	2.00288	no
AC006486.1	0.558724	9.90469	0.35864	0.0165359	5.53398	no
AC006547.13	0.375102	8.51129	3.80465	0.0296839	3.1926	no
AC006547.14	0.573387	30.3039	1.07184	0.0767473	17.3759	no
AC006978.6	0.509846	12.4385	21.6023	0.0156198	6.34171	no
AC007000.11	0.792614	58.5173	6.99028	0.0653393	46.3816	no
AC007038.7	1.90067	711.87	2.57687	0.0453917	1353.03	no
AC007163.3	0.705113	17.7025	0.337312	0.170786	12.4823	no
AC007182.6	0.541556	8.92009	1.23124	0.0484622	4.83073	no
AC007193.6	0.684981	57.9724	4.67498	0.390487	39.7099	no
AC007228.11	0.924471	32.9441	0.447077	0.0481501	30.4558	no
AC007246.3	0.360188	3.47944	5.85517	0.0115973	1.25325	no
AC007255.7	0.514407	12.8831	0.53742	0.0284255	6.62714	no
AC007276.5	0.598587	9.95213	0.662305	0.0351741	5.95721	no
AC007283.5	0.306572	6.71651	40.3103	0.00994689	2.05909	no
AC007285.6	0.835345	24.6273	0.796017	0.0310602	20.5723	no
AC007292.3	0.618736	26.5765	0.75874	0.0554133	16.4438	no
AC007292.6	0.504335	18.777	0.541684	0.0206361	9.46993	no
AC007318.5	0.341496	4.15811	1.56033	0.0119794	1.41998	no
AC007319.1	1.56935	153.807	3.81588	0.405947	241.377	no
AC007362.1	0.626602	7.5678	5.66561	0.0662537	4.742	no
AC007381.3	0.634849	19.2484	0.486096	0.0869343	12.2198	no
AC007382.1	0.377949	16.0381	9.22758	0.0176892	6.06158	no
AC007383.3	0.319108	2.98939	5.70662	0.0175378	0.953939	no
AC007383.4	0.45578	10.8645	5.30838	0.0529581	4.95184	no
AC007389.3	0.925479	80.1506	0.565061	0.246983	74.1777	no
AC007390.5	0.243501	3.17884	31.318	0.00610709	0.77405	no
AC007390.6	0.705423	28.1001	2.62283	0.0184049	19.8225	no
AC007405.2	0.809796	48.8811	0.425669	0.185332	39.5837	no
AC007405.6	0.894367	19.7033	1.02963	0.138321	17.622	no
AC007566.10	1.15904	123.537	1.3504	0.0665509	143.183	no
AC007620.3	0.538617	11.2256	35.1964	0.0394027	6.0463	no
AC007743.1	0.918812	29.6611	1.46528	0.222781	27.2529	no
AC007773.2	0.677314	11.4037	0.740826	0.0330157	7.7239	no
AC007875.2	1.36885	87.7424	2.47309	0.0976267	120.106	no
AC007879.2	0.916956	34.9917	0.478545	0.0300598	32.0858	no
AC007879.7	0.535381	9.74108	0.980735	0.0488824	5.21519	no
AC007969.5	0.435781	17.6297	2.22282	0.0439185	7.68269	no
AC007970.1	1.45713	201.56	2.11333	0.0370623	293.699	no
AC008074.3	0.904328	14.8993	2.41577	0.0476932	13.4738	no
AC008074.4	0.931106	29.7031	10.5904	0.104953	27.6567	no
AC008103.5	0.668291	38.3096	0.417272	0.165776	25.602	no
AC008280.5	0.596762	7.3867	3.44737	0.0146859	4.4081	no
AC008391.1	0.490867	29.0761	6.31695	0.0393149	14.2725	no
AC008592.3	0.587643	9.45433	2.83361	0.0585014	5.55577	no
AC008686.1	0.515766	7.06347	0.771275	0.00323299	3.6431	no
AC008746.12	0.789081	57.7086	1.59891	0.13582	45.5368	no
AC008982.2	0.469897	24.3116	6.33944	0.0566801	11.4239	no
AC008993.5	0.532035	10.2797	2.37127	0.0693298	5.46915	no
AC009061.1	0.607709	77.7608	3.44134	0.103425	47.256	no
AC009120.5	1.1827	166.883	3.83234	0.072594	197.372	no
AC009120.6	0.615093	164.715	4.32988	0.0814032	101.315	no
AC009133.12	0.30104	4.1182	3.28778	0.010467	1.23974	no
AC009237.8	0.458773	11.1729	4.35692	0.0232367	5.12584	no
AC009299.3	0.409075	5.84716	15.9974	0.0366257	2.39193	no
AC009336.24	0.807033	54.3851	0.782794	0.297844	43.8905	no
AC009403.2	0.45886	4.26615	4.01962	0.0140752	1.95757	no
AC009404.2	0.519553	23.3282	5.23312	0.0478896	12.1203	no
AC009501.4	0.448113	6.62641	7.34297	0.0543537	2.96938	no
AC009506.1	0.400883	4.37056	1.07213	0.0300931	1.75208	no
AC009948.5	0.433485	10.9366	8.43074	0.0147293	4.74084	no
AC009950.2	0.813971	110.533	2.10782	0.153644	89.9705	no
AC009961.3	0.748412	7.92601	3.69859	0.0580641	5.93192	no
AC010095.5	1.32891	88.8596	1.50181	0.0497162	118.087	no
AC010226.4	1.25216	62.5492	1.55809	0.0357549	78.3216	no
AC010504.2	0.627381	9.84314	1.00132	0.00967686	6.1754	no
AC010507.5	0.86797	50.7	6.82858	0.128135	44.0061	no
AC010525.6	0.654339	30.934	1.44594	0.0583742	20.2413	no
AC010536.1	0.500746	12.022	0.360892	0.0610682	6.01998	no
AC010642.1	0.839374	25.5922	0.310812	0.110496	21.4814	no
AC010733.5	0.610707	12.2661	7.82795	0.0268429	7.49097	no
AC010761.13	0.946775	104.031	4.77032	0.271006	98.4937	no
AC010761.8	0.312362	9.38852	5.96721	0.0211793	2.93262	no
AC010894.3	0.560607	14.133	1.2547	0.0313262	7.92305	no
AC010969.1	1.80073	90.3661	0.378802	0.0339636	162.725	no
AC010976.2	0.948994	31.5808	2.97036	0.0196335	29.97	no
AC010980.2	0.565777	10.5074	3.69059	0.0497113	5.94487	no
AC011242.6	0.872431	20.1753	1.06073	0.164067	17.6016	no
AC011290.5	0.52047	36.8442	2.0263	0.0301172	19.1763	no
AC011475.1	0.613796	28.0734	8.78938	0.117692	17.2314	no
AC011526.1	0.40727	5.1178	7.30737	0.0281532	2.08433	no
AC011738.4	0.795489	43.9889	0.214787	0.141947	34.9926	no
AC011747.7	0.61131	11.2139	2.21088	0.0347192	6.85515	no
AC011899.9	0.717327	21.5033	0.213879	0.106978	15.4249	no
AC012065.7	0.667391	44.4919	0.638108	0.0700427	29.6935	no
AC012146.7	0.461105	5.90506	2.43361	0.0493961	2.72285	no
AC012307.3	0.332045	9.83087	3.57388	0.0153879	3.26429	no
AC012313.1	0.549476	33.6283	22.7514	0.0447248	18.478	no
AC012318.3	0.584247	52.381	20.3052	0.10339	30.6035	no
AC012358.4	0.491626	14.3429	1.46063	0.037994	7.05132	no
AC012358.7	1.36866	94.6421	0.745893	0.0812937	129.533	no
AC012358.8	0.994181	32.0692	1.56465	0.27929	31.8826	no
AC012360.6	1.19927	55.3603	0.658928	0.161148	66.3922	no
AC013268.5	0.589682	26.7973	0.536843	0.105754	15.8019	no
AC013283.1	0.521159	7.36268	16.1329	0.057961	3.83712	no
AC013472.3	2.02679	129.935	0.395344	0.0248282	263.35	no
AC015849.16	1.28814	59.7344	1.54937	0.862792	76.9463	no
AC015849.19	0.585127	91.7494	10.3066	0.0844663	53.685	no
AC015971.2	1.51885	151.897	1.26971	0.203298	230.709	no
AC016586.1	0.723877	24.8817	0.576033	0.0255008	18.0113	no
AC016629.8	0.38492	9.4533	1.32486	0.029769	3.63877	no
AC016683.6	0.64569	19.4169	14.1056	0.244191	12.5373	no
AC016722.2	0.613097	10.0787	0.323128	0.0219336	6.17923	no
AC016722.4	0.625643	88.5883	0.877626	0.0360504	55.4246	no
AC016724.8	0.651553	40.6889	1.77853	0.0985344	26.5109	no
AC016725.4	0.498907	9.67665	0.690131	0.03049	4.82775	no
AC016735.2	0.835982	63.6342	2.28505	0.405685	53.1971	no
AC016738.4	0.520033	15.881	0.425325	0.0683632	8.25862	no
AC016745.3	1.34783	117.165	4.31711	0.0751992	157.918	no
AC016747.3	0.400726	8.13647	11.1604	0.0422804	3.26049	no
AC016757.3	1.10934	45.3122	0.47182	0.277873	50.2665	no
AC016831.7	2.4762	739.249	2.39531	0.130414	1830.53	no
AC017002.1	1.15552	87.0867	2.34053	0.521878	100.63	no
AC017048.3	0.540791	36.288	11.0134	0.142937	19.6242	no
AC017048.4	1.24387	88.3093	1.15984	0.0612914	109.846	no
AC017074.2	0.386073	6.91598	3.29182	0.0172264	2.67007	no
AC017099.3	0.640353	55.8123	3.70885	0.106243	35.7396	no
AC017116.8	0.395111	5.71846	1.42404	0.0296693	2.25943	no
AC018462.2	1.93399	149.305	0.943196	0.0281832	288.755	no
AC018470.4	0.561595	100.692	0.879626	0.152799	56.5482	no
AC018633.4	0.675926	15.0042	2.10828	0.028632	10.1418	no
AC018638.1	0.564219	19.3242	14.1322	0.0574915	10.9031	no
AC018642.1	0.54654	5.94145	2.11002	0.0143887	3.24724	no
AC018647.3	0.983736	35.7427	0.414021	0.0422566	35.1614	no
AC018720.10	1.10294	95.3616	0.854533	0.024	105.178	no
AC018737.1	0.640497	6.82717	4.98613	0.0217609	4.37278	no
AC018755.11	0.67321	47.6808	0.518958	0.0617367	32.0992	no
AC018816.3	1.36303	57.9988	1.30399	0.0653897	79.0543	no
AC018890.6	1.35194	178.808	0.683179	0.864018	241.738	no
AC019048.1	1.33154	38.914	0.707402	0.0362767	51.8157	no
AC019097.7	1.07705	73.6885	1.28641	0.078588	79.366	no
AC019117.2	0.912591	13.4076	1.40312	0.072568	12.2356	no
AC020571.3	0.717119	34.7415	0.721763	0.143522	24.9138	no
AC020910.2	0.565051	14.5519	1.28717	0.0287676	8.22258	no
AC021188.4	0.846667	48.5705	0.91005	0.179889	41.123	no
AC022007.5	0.508526	10.1473	0.942804	0.0187779	5.16015	no
AC022400.1	0.583148	58.5824	4.46073	0.0508275	34.1622	no
AC022431.1	0.62478	12.5627	0.904791	0.0682454	7.84894	no
AC022532.1	0.865493	57.2908	0.467808	0.138438	49.5848	no
AC022596.6	1.93899	1173.76	48.4435	1.19248	2275.92	no
AC024560.3	0.487839	25.2019	19.8253	0.0269061	12.2945	no
AC024580.1	1.08043	117.62	2.89515	0.298756	127.08	no
AC024937.6	0.483287	15.5237	1.24471	0.0472643	7.50242	no
AC025165.8	1.05835	91.3254	0.52621	0.23384	96.6543	no
AC025171.1	0.703815	22.2813	1.75939	0.0450801	15.6819	no
AC025335.1	0.397545	5.03752	45.087	0.0131238	2.00264	no
AC025918.2	1.53873	78.7201	1.76942	0.0342193	121.129	no
AC026271.5	0.250952	3.64529	3.58162	0.00781286	0.914794	no
AC026740.1	0.563167	106.181	2.52037	0.0753363	59.7974	no
AC026806.2	0.315173	4.46722	39.9321	0.0108807	1.40795	no
AC026904.1	0.70826	18.3072	0.195143	0.0590884	12.9662	no
AC027307.3	0.375252	3.83645	1.08329	0.0189268	1.43964	no
AC027601.1	0.620867	14.355	3.58943	0.0874479	8.91256	no
AC027612.6	0.818752	11.9507	15.5379	0.030409	9.78469	no
AC027763.2	0.497825	8.47849	2.09249	0.0217454	4.2208	no
AC034193.5	0.532638	15.2744	7.46668	0.0483037	8.13571	no
AC034220.3	0.979695	24.5628	1.22629	0.0956564	24.0641	no
AC046143.3	0.427621	4.48038	1.46345	0.0197042	1.9159	no
AC046143.7	0.592858	19.0809	0.435919	0.0972635	11.3122	no
AC058791.1	2.0228	192.767	4.89159	0.0884661	389.929	no
AC058791.2	1.85147	77.3917	5.72371	0.0323735	143.289	no
AC062017.1	0.506706	6.0224	1.82407	0.0566485	3.05159	no
AC062029.1	0.55026	14.8629	0.857408	0.0633052	8.17845	no
AC063976.7	1.28034	72.5795	0.464338	0.130585	92.9266	no
AC068039.4	0.799301	49.1752	0.947282	0.0765298	39.3058	no
AC068282.3	1.04904	42.7132	0.779678	0.355489	44.8077	no
AC068491.1	0.405658	8.72146	10.8039	0.0466134	3.53793	no
AC068580.5	0.681837	23.4508	6.08093	0.0906477	15.9896	no
AC068580.6	0.478041	20.9853	1.82927	0.0716845	10.0318	no
AC068831.10	0.506381	6.80289	0.192079	0.0298786	3.44485	no
AC068831.6	0.594417	27.4605	0.296599	0.0326185	16.323	no
AC068831.8	0.716752	60.6846	0.740514	0.0442517	43.4958	no
AC069278.4	0.576366	11.7798	1.86254	0.0406581	6.78947	no
AC069282.6	0.400715	9.02467	12.3266	0.0322924	3.61632	no
AC069513.3	0.815499	133.428	12.4023	0.0651975	108.811	no
AC069513.4	0.959519	25.0961	0.500923	0.046252	24.0802	no
AC069547.1	1.00572	22.5472	2.97614	0.056303	22.6763	no
AC072062.1	1.68384	89.3958	2.34119	0.0213886	150.529	no
AC073043.2	0.588907	6.48492	2.31349	0.0452175	3.81901	no
AC073046.25	0.67055	76.5137	9.84	0.359857	51.3062	no
AC073130.3	1.00467	23.8286	0.654287	0.00957664	23.9399	no
AC073150.4	0.390194	7.51056	0.896442	0.00935816	2.93058	no
AC073236.3	0.462669	81.8143	0.760472	0.0985166	37.8529	no
AC073254.1	0.450646	18.4753	1.078	0.0215072	8.32584	no
AC073343.1	0.727564	28.6454	0.675472	0.130534	20.8414	no
AC073346.2	0.26158	3.12784	27.1469	0.0108508	0.818182	no
AC073621.2	0.732085	19.1789	0.378961	0.067959	14.0406	no
AC073657.1	0.853679	28.0529	3.71989	0.0629355	23.9482	no
AC073850.6	0.808988	110.533	5.79078	0.17713	89.4197	no
AC074011.2	0.72156	30.6958	0.994438	0.0737201	22.1489	no
AC074093.1	1.57591	40.7957	4.82664	0.0676926	64.2904	no
AC074117.10	0.489481	6.89245	27.2215	0.0367989	3.37372	no
AC074138.3	1.06635	39.8085	1.78685	0.0567313	42.4498	no
AC074212.5	0.516714	15.1039	1.19505	0.0235122	7.8044	no
AC074212.6	0.501306	34.8105	2.68304	0.0519161	17.4507	no
AC074286.1	0.940524	20.8867	2.55985	0.0333607	19.6444	no
AC074289.1	0.728532	22.5811	2.26959	0.289935	16.451	no
AC074338.4	0.886095	36.8442	3.39743	0.0563668	32.6475	no
AC078883.3	1.86998	182.877	1.63018	0.0976314	341.976	no
AC079210.1	0.623541	43.4864	0.806484	0.0672715	27.1156	no
AC079250.1	0.475249	5.12065	0.675128	0.0279946	2.43358	no
AC079305.10	0.684726	23.3277	1.64232	0.115923	15.9731	no
AC079807.2	0.318476	5.88243	3.21826	0.0136506	1.87341	no
AC079922.3	0.516793	6.87616	0.672775	0.0213775	3.55355	no
AC079949.1	1.14725	71.7274	56.3659	0.65497	82.2889	no
AC083799.1	0.297303	3.54831	12.0538	0.01336	1.05492	no
AC083843.1	0.743076	57.9394	2.31439	0.0334022	43.0534	no
AC083899.3	0.293253	3.4943	0.549697	0.010715	1.02471	no
AC084018.1	0.509191	27.794	23.7068	0.0705954	14.1524	no
AC084117.3	0.662478	28.175	3.61688	0.0674238	18.6653	no
AC084125.4	0.612894	19.4743	1.94505	0.0614126	11.9357	no
AC084809.2	0.458405	6.47526	1.43672	0.0239998	2.96829	no
AC084809.3	0.537463	8.6032	0.785194	0.0418443	4.6239	no
AC087163.2	0.74987	56.35	1.40494	0.262258	42.2552	no
AC087294.2	1.21121	40.375	3.40347	0.0529878	48.9025	no
AC087393.1	0.918247	35.7876	0.681599	0.395567	32.8618	no
AC087793.1	0.657394	19.2988	5.30473	0.117914	12.687	no
AC090587.2	0.538407	40.8123	2.14122	0.109079	21.9737	no
AC090587.4	0.410183	12.7961	1.77494	0.0164667	5.24874	no
AC090945.1	0.936104	54.5952	0.445396	0.0954228	51.1068	no
AC091132.1	1.05086	27.9763	1.2757	0.0358795	29.3991	no
AC091633.3	0.449664	6.23515	0.740592	0.00437259	2.80372	no
AC091729.7	0.638429	24.1419	1.73828	0.120257	15.4129	no
AC091729.9	0.516815	8.02822	12.6593	0.0476964	4.1491	no
AC092171.1	0.356504	6.47067	1.93865	0.0250923	2.30682	no
AC092171.2	1.73933	68.3285	0.837646	0.00475886	118.846	no
AC092171.4	0.449224	7.88859	8.07232	0.0151901	3.54375	no
AC092295.7	0.630871	8.986	3.94388	0.0305298	5.66901	no
AC092431.1	0.698451	24.5233	1.76437	0.0410739	17.1283	no
AC092574.2	1.55613	64.1401	6.91699	0.0203858	99.8104	no
AC092594.1	1.55224	94.6391	4.12479	0.0567684	146.902	no
AC092620.3	0.888873	31.8307	0.536653	0.0942497	28.2934	no
AC092811.1	1.33961	76.849	0.651614	0.195516	102.948	no
AC092835.2	1.40632	156.506	1.00203	0.350696	220.098	no
AC093106.7	0.565336	8.19473	0.629964	0.100211	4.63278	no
AC093110.3	0.78644	266.579	6.79745	0.0678848	209.648	no
AC093157.1	0.763901	82.5111	0.8394	0.180201	63.0304	no
AC093162.5	0.411731	13.5803	13.4497	0.0414208	5.59141	no
AC093323.3	0.398202	6.8465	11.4603	0.0185876	2.72629	no
AC093382.1	1.6574	107.717	2.60128	0.0172527	178.531	no
AC093388.3	0.744883	30.5557	1.43107	0.0966641	22.7604	no
AC093391.2	0.350175	3.68985	2.19432	0.0327184	1.29209	no
AC093415.2	1.39607	40.2036	4.60649	0.0950362	56.127	no
AC093609.1	0.485406	7.90862	1.8102	0.0229229	3.83889	no
AC093616.4	0.610846	13.9883	0.463534	0.103634	8.54469	no
AC093620.5	1.12718	55.0774	0.946805	0.0651076	62.0823	no
AC093627.10	0.56828	12.4541	7.22923	0.098251	7.07739	no
AC093627.9	0.657199	18.4748	1.31686	0.0690238	12.1416	no
AC093642.3	1.22725	270.827	1.89105	0.400465	332.372	no
AC093642.5	0.983333	29.4011	2.58356	0.0229495	28.911	no
AC093668.3	0.673075	25.5918	1.40472	0.166819	17.2252	no
AC093673.5	0.467567	6.60405	5.58091	0.0595528	3.08784	no
AC093724.2	0.677762	29.271	1.93268	0.0738822	19.8387	no
AC093726.6	0.440699	11.3367	3.3873	0.0255449	4.99607	no
AC093734.13	0.655675	13.0573	20.7435	0.0704225	8.56133	no
AC093818.1	0.584655	6.25948	7.33283	0.046799	3.65964	no
AC093838.4	0.627341	71.2318	8.53885	0.0480323	44.6867	no
AC096579.13	0.935555	21.2355	1.10106	0.4635	19.867	no
AC096579.7	1.01252	79.1948	2.12787	0.548876	80.1859	no
AC096772.6	0.323704	5.41613	8.53143	0.0155197	1.75322	no
AC097500.2	2.11362	143.042	6.23002	0.0708628	302.338	no
AC097658.1	1.58479	60.103	0.53598	0.0188396	95.2507	no
AC097662.2	0.749789	12.4703	0.471399	0.0265465	9.35009	no
AC097724.3	0.974096	67.9177	1.07899	0.133293	66.1583	no
AC098614.2	0.407225	8.83464	1.90502	0.0332224	3.59769	no
AC098820.3	0.796908	29.5294	0.497161	0.0690471	23.5322	no
AC098823.3	0.783137	19.2537	0.162108	0.231057	15.0783	no
AC099850.1	0.45586	5.87074	0.976025	0.0287343	2.67624	no
AC100830.3	0.801512	39.0116	0.369846	0.0706658	31.2682	no
AC103965.1	0.905294	34.6461	9.13872	0.134952	31.3649	no
AC104532.4	0.495824	17.5955	0.855445	0.0305826	8.72429	no
AC104655.2	0.626471	56.2002	1.84313	0.0524565	35.2078	no
AC104695.3	0.773259	22.2459	0.265479	0.0884749	17.2019	no
AC104809.3	0.732565	28.1529	0.138976	0.0910825	20.6238	no
AC105020.1	0.527818	67.7633	2.15277	0.0994972	35.7667	no
AC105760.2	0.758002	10.9594	0.59998	0.0203766	8.30724	no
AC108058.1	0.784727	39.0116	0.969392	0.212178	30.6134	no
AC108142.1	1.0014	84.452	1.21205	0.720736	84.5701	no
AC108456.1	0.726645	21.9684	3.48141	0.00429973	15.9632	no
AC108463.2	0.748023	22.1623	1.04977	0.110089	16.5779	no
AC108488.3	0.376028	5.0186	2.61319	0.0483819	1.88713	no
AC108488.4	0.61723	15.2553	2.30981	0.0627628	9.41602	no
AC109333.10	0.564596	33.1658	1.49177	0.0974196	18.7252	no
AC109642.1	0.85853	39.6343	0.246397	0.206096	34.0273	no
AC109826.1	0.816839	20.6757	0.303439	0.0781593	16.8887	no
AC110084.1	0.807149	21.8086	6.93356	0.0312451	17.6028	no
AC110619.2	0.976491	164.04	1.45178	0.444142	160.184	no
AC112229.1	0.841748	24.5059	0.349877	0.19838	20.6278	no
AC112229.7	0.464406	9.43645	0.863071	0.0531444	4.38234	no
AC113189.5	0.488656	7.1611	7.93653	0.0317516	3.49931	no
AC115522.3	0.412986	5.37868	28.5344	0.0269575	2.22132	no
AC115618.1	0.469888	8.78129	0.502105	0.0105781	4.12622	no
AC116366.6	0.59231	135.457	1.44575	0.123728	80.2324	no
AC116407.2	0.644851	14.6695	0.928987	0.100299	9.45966	no
AC116614.1	2.17266	314.445	2.04822	0.796756	683.182	no
AC122129.1	0.984586	149.544	2.9135	0.394788	147.239	no
AC123768.4	0.690448	18.4407	2.7591	0.0783723	12.7324	no
AC123886.2	0.621585	33.3101	0.774966	0.149813	20.705	no
AC124789.1	0.538513	8.34244	7.45481	0.107058	4.49251	no
AC124944.2	0.537745	11.6406	1.21849	0.0656938	6.25966	no
AC125232.1	0.489175	6.44725	3.76348	0.0280169	3.15383	no
AC127496.1	0.412486	6.95582	1.13441	0.0286029	2.86918	no
AC128709.1	0.583775	15.6509	1.30316	0.0768873	9.13664	no
AC129492.6	0.569043	8.88441	1.92096	0.0839196	5.05561	no
AC129929.5	0.675793	10.9505	0.244579	0.00884766	7.40026	no
AC130352.1	1.14203	25.4892	9.37189	0.0262582	29.1093	no
AC131097.4	1.34716	38.8134	1.64813	0.595929	52.2877	no
AC131971.1	2.07327	149.558	2.43861	0.0487342	310.074	no
AC132872.1	0.355142	15.8172	0.502689	0.0221754	5.61735	no
AC132872.2	1.08042	145.21	0.945112	0.143102	156.887	no
AC133528.2	0.324014	6.63057	11.0869	0.0220555	2.1484	no
AC133785.1	0.441535	4.80964	1.2637	0.0230665	2.12362	no
AC133919.6	0.436703	9.24653	0.412499	0.01798	4.03799	no
AC135178.1	0.607005	25.7093	2.34961	0.138982	15.6057	no
AC137932.1	0.401979	76.1479	1.17429	0.0612559	30.6099	no
AC137932.5	0.826804	124.024	7.84575	0.293632	102.543	no
AC137934.1	0.397334	38.1359	3.00752	0.0413912	15.1527	no
AC138035.2	0.468426	26.5765	0.596419	0.060048	12.4491	no
AC139099.3	0.542698	16.6995	0.855026	0.101854	9.06277	no
AC139100.2	1.08779	26.6648	8.95223	0.0303444	29.0057	no
AC139100.3	1.50813	135.818	1.7303	0.0871151	204.832	no
AC139666.1	0.738222	37.5217	2.02889	0.238051	27.6993	no
AC139887.4	0.726608	23.6235	1.39372	0.0453411	17.165	no
AC141586.5	0.312852	5.44754	2.41753	0.0170098	1.70428	no
AC141928.1	1.22756	93.6488	0.2945	1.11045	114.96	no
AC144831.1	0.734016	64.2986	7.50096	0.125034	47.1962	no
AC145124.2	1.14227	53.153	0.728363	0.231254	60.7148	no
AC147651.4	0.737536	25.1626	1.24609	0.151982	18.5583	no
AC159540.1	0.706126	86.2182	32.1374	0.0897636	60.8809	no
AC159540.2	1.3686	88.2203	1.1364	0.138754	120.739	no
AC226150.4	0.742496	33.733	1.16983	0.19228	25.0466	no
ACAA1	0.455502	6.99018	35.3036	0.0130702	3.18404	no
ACAA2	1.0044	22.8432	41.8145	0.199462	22.9439	no
ACACA	0.309773	6.84856	19.6927	0.0101911	2.1215	no
ACACB	0.956237	85.4297	3.16691	0.220368	81.691	no
ACAD10	0.298481	6.96993	6.18099	0.01067	2.08039	no
ACAD8	0.488817	6.68592	19.7704	0.0314173	3.26819	no
ACAD9	0.35813	3.78129	32.0385	0.00884431	1.35419	no
ACADM	0.700526	8.76503	32.8346	0.0724943	6.14013	no
ACADS	0.408785	5.85285	15.0117	0.0178242	2.39255	no
ACADSB	0.678975	15.2243	8.9072	0.0306046	10.3369	no
ACADVL	0.431836	4.56797	144.193	0.0165619	1.97261	no
ACAN	0.703071	42.5647	0.235251	0.279353	29.926	no
ACAP1	0.793196	13.4963	14.8	0.141291	10.7052	no
ACAP2	0.386251	7.50026	35.539	0.00522588	2.89699	no
ACAP2-IT1	1.50818	114.419	2.78312	0.122812	172.564	no
ACAP3	0.587888	21.0297	27.4954	0.0609613	12.3631	no
ACAT1	0.452299	3.87696	17.2694	0.00800038	1.75354	no
ACAT2	0.82342	14.2052	34.3875	0.0932202	11.6968	no
ACBD3	0.158728	2.33625	41.2317	0.00127302	0.370829	no
ACBD4	0.383991	7.33276	4.416	0.0306919	2.81572	no
ACBD5	0.373354	5.69721	55.4524	0.0027374	2.12707	no
ACBD6	0.309186	3.42783	28.6769	0.00709652	1.05983	no
ACBD7	0.751117	38.1149	1.34015	0.230898	28.6287	no
ACCS	0.577247	42.2937	12.068	0.0827679	24.4139	no
ACD	0.393403	7.93022	10.309	0.00822022	3.11978	no
ACE	0.53041	9.55069	1.83989	0.0696749	5.06578	no
ACE2	0.534792	9.24744	0.940203	0.0683492	4.94546	no
ACER1	0.398082	6.44402	44.3754	0.0192788	2.56525	no
ACER2	0.465107	13.1521	5.72465	0.0316285	6.11714	no
ACER3	0.351368	4.71006	10.923	0.0110581	1.65497	no
ACHE	0.886303	43.3933	1.76915	0.211968	38.4596	no
ACIN1	0.316185	6.59495	94.434	0.00810244	2.08523	no
ACLY	0.634733	8.4895	65.0792	0.0302378	5.38857	no
ACMSD	1.07536	58.5419	0.438344	0.0344678	62.9537	no
ACN9	0.414109	6.03172	19.8054	0.0165721	2.49779	no
ACO1	0.789698	11.1186	21.4421	0.0737782	8.78038	no
ACO2	0.317742	3.56127	35.4648	0.00507056	1.13156	no
ACOT1	1.64363	77.902	8.07677	0.528799	128.042	no
ACOT11	0.528546	8.7711	2.60129	0.0469339	4.63593	no
ACOT13	0.289721	4.10987	10.0696	0.00720945	1.19072	no
ACOT2	1.27152	18.7128	16.0129	0.253144	23.7937	no
ACOT4	0.875318	20.5044	2.44265	0.154006	17.9479	no
ACOT7	0.400925	11.6326	29.6641	0.00591555	4.66378	no
ACOT8	0.249961	3.11457	20.282	0.00506881	0.778519	no
ACOT9	0.314179	7.11364	22.934	0.0129433	2.23496	no
ACOX1	0.460808	4.88829	91.9856	0.00497742	2.25257	no
ACOX2	1.37578	44.6873	4.92112	0.639454	61.48	no
ACOX3	0.310731	3.35345	22.4552	0.00564217	1.04202	no
ACP1	0.224229	2.17234	84.5209	0.00459311	0.4871	no
ACP2	0.251979	2.53585	16.2284	0.00526728	0.638981	no
ACP5	0.411327	7.05152	42.4455	0.00840189	2.90048	no
ACP6	0.576295	9.79708	21.16	0.0895884	5.64601	no
ACPL2	1.53	44.2155	9.45714	0.145517	67.6498	no
ACPP	0.393165	5.31028	77.284	0.0233278	2.08782	no
ACPT	1.24172	40.3487	0.422436	0.00971988	50.1018	no
ACR	0.859856	17.2738	0.301115	0.18461	14.853	no
ACRBP	0.557741	8.49134	1.3719	0.0778656	4.73597	no
ACRC	0.5767	17.9296	1.21471	0.086072	10.34	no
ACRV1	0.412274	8.03327	1.29997	0.0423592	3.31191	no
ACSBG1	1.81091	255.795	18.9397	1.149	463.221	no
ACSF2	0.4304	8.02826	13.8281	0.0291097	3.45536	no
ACSF3	0.312183	6.16917	5.90098	0.0155122	1.92591	no
ACSL1	0.913759	15.4458	236.854	0.139537	14.1137	no
ACSL3	0.497578	7.23432	24.7979	0.0242818	3.59964	no
ACSL4	0.326643	4.29804	23.7912	0.0101647	1.40393	no
ACSL5	1.06679	30.8341	10.8686	0.25632	32.8936	no
ACSL6	0.723043	50.6114	0.493456	0.367114	36.5942	no
ACSM1	0.902628	13.8147	0.738817	0.132162	12.4695	no
ACSM3	1.34379	65.6497	4.32373	0.739393	88.2195	no
ACSM5	1.1483	38.7019	1.08382	0.0904033	44.4414	no
ACSS1	0.39176	8.74336	9.0026	0.0316293	3.4253	no
ACSS2	0.910824	10.8376	36.7312	0.100911	9.87111	no
ACSS3	1.10835	72.834	4.74019	0.39078	80.7257	no
ACTA2	0.801056	28.8463	20.7144	0.0775056	23.1075	no
ACTA2-AS1	1.40585	120.827	1.37441	0.270638	169.865	no
ACTB	0.423757	10.7335	2681.51	0.00709052	4.54838	ref
ACTG1	0.324925	4.67341	4368.23	0.00508016	1.51851	no
ACTG1P3	0.656669	16.3917	1.46499	0.0603187	10.7639	no
ACTG2	1.48297	308.103	5.13849	1.49057	456.907	no
ACTL10	0.384652	7.89217	1.74716	0.0135836	3.03574	no
ACTL6A	0.3066	2.9695	51.9874	0.00528863	0.910447	no
ACTN1	0.491901	8.25822	116.041	0.0235	4.06223	no
ACTN4	0.426865	8.18952	104.071	0.00231951	3.49582	no
ACTR10	0.145032	1.7452	34.557	0.00156246	0.253109	no
ACTR1A	0.189026	2.23002	72.4677	0.00137051	0.421532	no
ACTR1B	0.309688	3.25619	27.665	0.00799331	1.0084	no
ACTR2	0.217119	3.00204	251.599	0.00137036	0.651802	no
ACTR3	0.150183	2.10796	79.7528	0.00223103	0.31658	no
ACTR3B	0.266483	3.48357	1.83053	0.0113489	0.928311	no
ACTR3C	0.852441	10.6897	6.51569	0.0150165	9.11237	no
ACTR5	0.236554	3.29234	11.9355	0.00394304	0.778817	no
ACTR6	0.322231	3.55933	26.605	0.0144826	1.14693	no
ACTR8	0.284779	3.5436	21.5927	0.00289255	1.00914	no
ACTRT3	0.433045	6.13413	1.3787	0.0299548	2.65635	no
ACVR1	0.631266	7.02097	33.1836	0.0183094	4.4321	no
ACVR1B	0.318567	6.6633	56.6385	0.00717597	2.12271	no
ACVR1C	1.13023	37.1663	1.22192	0.18538	42.0065	no
ACVR2A	0.681806	16.8653	28.2362	0.0344568	11.4989	no
ACVR2B	1.05981	46.147	0.468358	0.308035	48.9069	no
ACVR2B-AS1	0.832721	16.5854	0.810039	0.273818	13.811	no
ACVRL1	0.410775	6.01386	6.47723	0.0267644	2.47034	no
ACY1	0.510807	6.19026	1.10089	0.0504723	3.16203	no
ACYP1	0.333591	4.74571	11.8051	0.0183699	1.58313	no
ACYP2	0.531528	6.76555	13.1659	0.0617426	3.59608	no
AD000090.2	0.533982	65.8136	12.3449	0.113374	35.1433	no
AD000092.3	1.05244	44.0314	0.655515	0.0914512	46.3405	no
ADA	0.352793	4.65698	5.6898	0.0204292	1.64295	no
ADAD2	1.49998	46.4618	0.889114	0.229908	69.692	no
ADAL	0.367924	4.63742	2.45563	0.0201221	1.70622	no
ADAM10	0.267628	3.82679	37.5568	0.0046447	1.02415	no
ADAM11	0.578662	7.99157	1.96497	0.0469754	4.62442	no
ADAM12	0.633264	17.2562	3.30256	0.0811733	10.9277	no
ADAM15	0.423684	5.32008	118.622	0.01112	2.25403	no
ADAM17	0.274793	3.71025	19.6186	0.00401504	1.01955	no
ADAM19	0.629076	8.20908	4.17702	0.0782881	5.16413	no
ADAM1A	0.689338	30.0949	5.2673	0.0530128	20.7455	no
ADAM20	2.13511	195.473	0.571314	0.058491	417.357	no
ADAM22	1.40074	176.636	1.17286	0.160041	247.42	no
ADAM23	1.04878	66.7206	20.9179	0.402267	69.9752	no
ADAM28	0.560194	14.626	5.78566	0.0458748	8.1934	no
ADAM32	1.13076	29.6755	0.50338	0.0355091	33.5558	no
ADAM33	0.639672	25.5511	7.49977	0.0823453	16.3444	no
ADAM8	0.806952	32.3445	7.20737	0.0804347	26.1005	no
ADAM9	0.290918	3.57544	36.9037	0.00579019	1.04016	no
ADAMDEC1	1.03452	108.236	10.9473	0.282733	111.972	no
ADAMTS1	0.887411	26.3222	23.5946	0.136776	23.3586	no
ADAMTS10	0.494731	17.3032	6.12904	0.054575	8.56043	no
ADAMTS12	0.929018	27.3162	3.42192	0.257058	25.3773	no
ADAMTS13	0.692149	122.051	1.38512	0.173261	84.4773	no
ADAMTS14	1.13995	41.9673	3.2908	0.198575	47.8406	no
ADAMTS15	1.08623	44.1192	4.39728	0.465387	47.9236	no
ADAMTS17	1.20956	75.9275	2.88418	0.111225	91.8388	no
ADAMTS2	0.644427	15.7975	12.6123	0.0917128	10.1804	no
ADAMTS3	2.99389	233.465	2.24154	0.614648	698.968	no
ADAMTS4	1.12585	43.4623	3.48814	0.29434	48.932	no
ADAMTS5	1.08666	26.1665	5.71571	0.116258	28.4341	no
ADAMTS6	1.18665	72.1418	0.897511	0.239494	85.6068	no
ADAMTS7	0.606412	15.5665	2.25524	0.0749955	9.4397	no
ADAMTS9	0.674841	9.95672	2.31095	0.0351151	6.7192	no
ADAMTS9-AS2	2.19595	360.391	2.27459	0.089305	791.402	no
ADAMTSL1	1.18157	123.956	0.703644	0.201191	146.462	no
ADAMTSL2	0.491805	11.4259	1.43317	0.0274568	5.61934	no
ADAMTSL3	1.1299	124.19	1.69677	0.513886	140.321	no
ADAMTSL4	0.710387	9.69163	6.99311	0.0916218	6.88481	no
ADAMTSL5	0.792391	19.5353	3.30261	0.0990052	15.4796	no
ADAP1	0.754088	12.655	1.68612	0.0818028	9.54297	no
ADAP2	0.450046	6.93629	29.7877	0.0206977	3.12165	no
ADAR	0.482857	8.52246	115.741	0.015605	4.11513	no
ADARB1	0.401757	8.64514	9.31293	0.0197774	3.47324	no
ADARB2	1.79362	177.152	0.217881	0.904681	317.743	no
ADAT1	0.245255	5.34236	27.3001	0.00646679	1.31024	no
ADAT2	0.376896	10.645	11.527	0.0253063	4.01206	no
ADAT3	0.438058	22.7924	8.26764	0.0125555	9.98439	no
ADC	0.41361	8.16589	3.16463	0.02699	3.37749	no
ADCK1	0.531886	7.29813	3.28102	0.0395646	3.88177	no
ADCK2	0.265585	3.12622	33.6072	0.00574201	0.830277	no
ADCK3	0.65319	17.1187	9.45223	0.051034	11.1818	no
ADCK4	0.269728	3.01273	12.0569	0.00546157	0.812616	no
ADCK5	0.451657	6.28351	9.69762	0.0214676	2.83799	no
ADCY1	0.81397	19.5926	0.691148	0.152164	15.9478	no
ADCY10P1	0.672404	23.2859	1.79138	0.0993693	15.6576	no
ADCY2	1.23238	181.389	1.28818	0.288397	223.539	no
ADCY3	0.396492	4.86338	22.4173	0.00641897	1.92829	no
ADCY4	0.430629	10.166	8.21862	0.0386901	4.37777	no
ADCY5	0.528757	12.462	1.19024	0.0829718	6.58938	no
ADCY6	0.386288	19.5017	8.12614	0.0312784	7.53329	no
ADCY7	0.329001	4.83046	5.15984	0.0123359	1.58923	no
ADCY9	0.322407	5.21259	9.07415	0.0121709	1.68057	no
ADCYAP1R1	0.546461	11.2413	2.92705	0.0691922	6.14293	no
ADD1	0.231445	3.70029	40.0388	0.0022925	0.856412	no
ADD2	1.43447	75.8236	0.641657	0.719058	108.767	no
ADD3	0.805347	18.6602	33.7293	0.0265891	15.0279	no
ADH1B	2.18159	6326.89	54.0984	2.32338	13802.7	no
ADH5	0.22996	2.53314	55.8978	0.00324356	0.582521	no
ADH6	0.953838	67.1866	0.684108	0.109918	64.0851	no
ADH7	0.985723	56.4373	12.0651	0.53469	55.6316	no
ADHFE1	0.731566	27.5597	1.72802	0.148604	20.1618	no
ADI1	0.372801	3.59079	74.8181	0.0111524	1.33865	no
ADIPOR1	0.277592	3.00255	182.517	0.00599094	0.833486	no
ADIPOR2	0.205347	2.18098	57.2319	0.00250592	0.447857	no
ADIRF	0.486774	18.2696	2.80338	0.0649538	8.89316	no
ADIRF-AS1	0.48099	9.28522	20.2638	0.0476602	4.4661	no
ADK	0.178129	1.9282	41.2429	0.00323086	0.343468	no
ADM	0.689189	13.0705	48.0307	0.0670575	9.00807	no
ADM2	0.899783	72.6393	9.27753	0.193788	65.3596	no
ADM5	0.458354	4.96979	1.35066	0.0285194	2.27792	no
ADNP	0.28213	6.34858	337.061	0.00603339	1.79112	no
ADNP2	0.273121	4.07968	150.474	0.00589991	1.11425	no
ADO	0.247353	3.18697	13.1713	0.00475373	0.788307	no
ADORA1	1.39368	216.396	0.371027	0.836204	301.587	no
ADORA2A-AS1	1.17131	169.493	0.810508	0.663701	198.528	no
ADORA2B	0.306638	3.93429	7.88101	0.0151052	1.2064	no
ADORA3	0.826821	25.2673	2.47017	0.178348	20.8915	no
ADPGK	0.213263	3.13307	43.3823	0.00353437	0.668169	no
ADPGK-AS1	1.39353	52.4638	1.09921	0.0268291	73.1099	no
ADPRH	0.348317	3.55703	3.18864	0.0179798	1.23898	no
ADPRHL1	0.876471	16.5032	4.26124	0.132151	14.4645	no
ADPRHL2	0.276094	4.53101	39.8945	0.00296047	1.25099	no
ADPRM	0.455025	4.48964	6.59443	0.014536	2.0429	no
ADRA2A	0.635809	21.0085	6.78561	0.140759	13.3574	no
ADRA2B	0.803538	28.3374	0.350162	0.136644	22.7702	no
ADRA2C	0.7306	13.447	1.77487	0.167962	9.82439	no
ADRB2	0.613385	12.7681	9.83537	0.0962042	7.83177	no
ADRBK1	0.370246	5.54511	49.8382	0.00445317	2.05306	no
ADRBK2	0.485108	9.11507	7.31092	0.0152294	4.42179	no
ADRM1	0.330739	6.14543	56.1807	0.00194815	2.03253	no
ADSL	0.164422	1.72793	12.8702	0.00259799	0.284109	no
ADSS	0.267046	3.31843	41.5169	0.00316161	0.886173	no
ADSSL1	0.674599	13.4484	5.77133	0.0727448	9.07228	no
ADTRP	0.968935	25.5829	77.9877	0.215435	24.7882	no
AEBP1	0.664485	15.4606	50.6026	0.07397	10.2733	no
AEBP2	0.312039	5.91924	42.0691	0.00773795	1.84703	no
AEN	0.343001	5.63009	10.3276	0.00364582	1.93112	no
AES	0.402404	8.33509	113.542	0.00522216	3.35408	no
AF001548.5	0.503292	8.64903	2.18147	0.0672732	4.35298	no
AF011889.5	0.822244	164.715	2.22061	0.0636863	135.436	no
AF064858.10	1.11503	43.9447	2.19524	0.103772	48.9997	no
AF064858.11	0.475444	9.9077	3.15205	0.0213864	4.71055	no
AF064858.8	0.574616	8.97885	1.59012	0.0253769	5.15939	no
AF127936.7	0.57953	11.3453	1.95412	0.0190868	6.57493	no
AF129075.5	0.686469	21.0751	2.50947	0.0241526	14.4674	no
AF131215.2	0.483797	18.4221	6.40082	0.0533752	8.91258	no
AF131215.9	0.542917	15.1712	3.76469	0.0878972	8.23668	no
AF131216.6	1.72723	104.595	0.473212	0.0522491	180.66	no
AF146191.4	1.33888	88.8434	0.761183	0.0733166	118.951	no
AF207550.1	1.10342	48.7644	1.37654	0.0979742	53.8075	no
AF238380.5	0.368601	12.6086	1.24102	0.029373	4.64753	no
AFAP1	0.518956	6.26791	6.62827	0.0151803	3.25277	no
AFAP1L1	0.335657	4.01432	5.25565	0.0153003	1.34743	no
AFAP1L2	0.413543	4.92914	36.948	0.0178792	2.03841	no
AFF1	0.470489	13.8098	15.3101	0.0114468	6.49737	no
AFF2	1.13711	27.9123	0.331429	0.170037	31.7394	no
AFF3	0.987988	21.9918	1.97254	0.0558178	21.7276	no
AFF4	0.405498	6.9332	34.8753	0.0103235	2.8114	no
AFG3L1P	0.280779	10.9168	6.99815	0.01436	3.06522	no
AFG3L2	0.297694	4.82308	38.5859	0.00649421	1.4358	no
AFMID	0.391866	4.93693	14.4236	0.0147349	1.93462	no
AFTPH	0.337786	6.61812	62.5707	0.00405686	2.23551	no
AGA	0.264136	2.90173	21.4608	0.00550335	0.766454	no
AGAP1	0.412553	6.82628	4.85221	0.0131454	2.81621	no
AGAP10	0.448918	24.8125	0.288149	0.0527291	11.1388	no
AGAP11	1.39265	250.559	1.35831	0.174916	348.942	no
AGAP2	0.518802	8.0234	4.6943	0.0391277	4.16256	no
AGAP3	0.359901	4.2883	19.9574	0.00494729	1.54337	no
AGAP4	0.506776	15.9884	4.40391	0.12396	8.10255	no
AGAP6	0.405597	19.0737	11.8646	0.0287286	7.73622	no
AGAP8	0.528318	53.5946	2.5136	0.0837842	28.315	no
AGBL2	0.621867	19.6307	0.6096	0.110935	12.2077	no
AGBL3	0.877219	24.7529	1.51081	0.0406284	21.7138	no
AGBL5	0.262211	2.8789	12.5547	0.00667653	0.75488	no
AGBL5-IT1	0.5833	12.4889	2.33753	0.0140512	7.2848	no
AGER	0.571104	20.2461	5.93671	0.0718218	11.5627	no
AGFG1	0.210473	2.32273	77.5359	0.00421267	0.488871	no
AGFG2	0.33665	8.00826	6.35518	0.0158784	2.69598	no
AGGF1	0.281137	3.86494	19.5611	0.00452827	1.08658	no
AGGF1P1	0.960496	76.8894	0.486938	0.313256	73.8519	no
AGK	0.301688	4.61875	20.2472	0.00451588	1.39342	no
AGL	0.499964	11.1767	8.16289	0.0102934	5.58796	no
AGMAT	0.493432	9.8313	0.834355	0.0469409	4.85108	no
AGMO	2.38576	212.332	0.410572	0.699079	506.573	no
AGO1	0.380675	8.87013	10.981	0.0160347	3.37664	no
AGO2	0.596698	7.99637	10.8446	0.0557641	4.77142	no
AGO3	1.26078	18.7278	5.47493	0.00594154	23.6117	no
AGO4	0.446365	13.3964	17.574	0.0137163	5.97967	no
AGPAT1	1.10457	25.7895	16.7808	0.112274	28.4864	no
AGPAT2	0.369827	6.39375	34.7749	0.00888226	2.36459	no
AGPAT3	0.965502	16.2331	55.6677	0.0784703	15.6731	no
AGPAT4	0.631876	10.7099	3.48697	0.0526593	6.76732	no
AGPAT5	0.346682	3.84494	11.3175	0.01069	1.33297	no
AGPAT6	0.209001	3.62704	16.8404	0.0026857	0.758054	no
AGPAT9	0.477017	5.93082	5.84312	0.0247421	2.82911	no
AGPHD1	0.560882	10.8712	2.10165	0.0810635	6.09743	no
AGPS	0.275713	3.96531	13.7362	0.00501276	1.09329	no
AGRN	0.594194	28.7878	22.274	0.0207552	17.1055	no
AGTPBP1	0.484461	9.61563	11.383	0.00724007	4.6584	no
AGTR1	1.84275	285.859	1.98084	0.234676	526.765	no
AGTRAP	0.371295	6.83604	26.9963	0.00996175	2.53819	no
AGXT	0.867679	38.4447	0.119915	0.232862	33.3577	no
AGXT2L2	0.377833	5.0095	17.5674	0.007573	1.89276	no
AHCTF1	0.4189	11.1079	17.2953	0.0126935	4.6531	no
AHCTF1P1	0.619097	21.9684	0.545569	0.0765199	13.6006	no
AHCY	0.315427	4.45495	66.7617	0.00373711	1.40521	no
AHCYL1	0.274972	3.38344	114.665	0.00443049	0.930352	no
AHCYL2	0.333819	7.08335	25.1548	0.0160081	2.36456	no
AHDC1	0.479449	10.6373	12.978	0.0144929	5.10005	no
AHI1	0.748053	30.7489	14.2143	0.02412	23.0018	no
AHNAK	0.891024	19.7966	7213.77	0.0119395	17.6393	no
AHNAK2	0.609112	15.1217	67.315	0.0160199	9.21083	no
AHR	0.45817	6.64325	82.2537	0.00933927	3.04374	no
AHRR	0.404685	9.09149	2.3254	0.0340588	3.67919	no
AHSA1	0.194714	2.43273	62.3236	0.00178143	0.473687	no
AHSA2	0.541129	49.6978	81.129	0.0874785	26.893	no
AIDA	0.191053	2.42369	78.3635	0.0027754	0.463053	no
AIF1	0.668025	12.8778	21.8839	0.144539	8.60267	no
AIF1L	0.335091	4.79956	10.7538	0.0175398	1.60829	no
AIFM1	0.340501	4.34842	22.9831	0.00870968	1.48064	no
AIFM2	0.410525	4.85437	4.45502	0.0271075	1.99284	no
AIFM3	0.467157	10.7137	0.236117	0.0400323	5.00499	no
AIG1	0.253055	3.43424	32.3623	0.0073037	0.869053	no
AIM1	0.28668	3.74248	106.077	0.00485769	1.07289	no
AIM1L	0.455665	6.68203	21.9616	0.0100739	3.04477	no
AIM2	1.30726	143.972	9.79678	0.695072	188.209	no
AIMP1	0.184357	2.16288	33.316	0.00310452	0.398742	no
AIMP2	0.238886	3.25552	13.8982	0.00543386	0.777698	no
AIP	0.407212	4.00232	26.1694	0.0170148	1.62979	no
AJAP1	1.11295	49.4708	5.4948	0.661168	55.0583	no
AJUBA	0.509858	11.8195	65.7404	0.0269268	6.02627	no
AK1	0.340923	5.01976	9.21336	0.011454	1.71135	no
AK2	0.24731	2.52174	198.179	0.00406158	0.623653	no
AK3	0.313665	3.89008	113.287	0.00980363	1.22018	no
AK4	0.293992	3.30109	19.858	0.00747341	0.970493	no
AK5	0.658641	9.13282	1.96011	0.0993536	6.01525	no
AK7	0.989457	24.305	2.25654	0.0306016	24.0487	no
AK8	0.405706	5.13555	1.4425	0.0210143	2.08352	no
AK9	0.686725	10.9308	1.68322	0.0098263	7.50644	no
AKAP1	0.460302	11.4909	43.5163	0.0270774	5.28928	no
AKAP10	0.355944	4.60497	17.0275	0.00335157	1.63911	no
AKAP11	0.576157	12.9208	14.2003	0.0101621	7.4444	no
AKAP12	1.23103	30.6171	7.25487	0.0647493	37.6904	no
AKAP13	0.618156	12.9323	21.3344	0.0109003	7.99417	no
AKAP3	0.592372	11.8118	1.3835	0.0685993	6.99696	no
AKAP5	1.19341	62.7869	0.830373	0.141844	74.9307	no
AKAP6	0.922216	32.0499	3.28377	0.0824153	29.5569	no
AKAP7	0.478167	5.79937	2.19145	0.0186501	2.77307	no
AKAP8	0.248055	5.23921	23.3263	0.00419232	1.29961	no
AKAP8L	0.33078	6.25042	20.3108	0.00951694	2.06751	no
AKAP9	1.22821	60.4983	20.4633	0.0158876	74.3045	no
AKIP1	0.276331	3.07123	16.4789	0.0103149	0.848673	no
AKIRIN1	0.189536	2.34979	36.2058	0.0014503	0.44537	no
AKIRIN2	0.371165	7.72235	33.4432	0.00419714	2.86627	no
AKNA	0.696883	8.73853	9.53915	0.0706627	6.08973	no
AKNAD1	0.617464	33.2569	0.305822	0.0923794	20.5349	no
AKR1A1	0.26369	2.53038	89.6308	0.00601771	0.667236	no
AKR1B1	0.357047	3.81968	17.0337	0.0144393	1.36381	no
AKR1B10	0.620047	36.4279	116.184	0.0409356	22.587	no
AKR1B15	0.810077	90.0844	18.0823	0.103869	72.9753	no
AKR1C1	0.640025	11.1342	6.75798	0.121795	7.12617	no
AKR1C2	0.485995	5.6616	31.4412	0.0601221	2.75151	no
AKR1C3	0.621762	8.76552	15.1599	0.0473886	5.45007	no
AKR1E2	0.79172	14.0875	2.78652	0.029497	11.1534	no
AKR7A2	0.224977	2.49711	24.7239	0.00531492	0.561794	no
AKR7A3	0.490427	16.4648	2.02036	0.0458667	8.07478	no
AKR7L	0.583261	170.024	2.35127	0.0922916	99.1686	no
AKT1	0.308653	3.96144	48.9567	0.00214041	1.22271	no
AKT1S1	0.346897	7.41476	80.092	0.00142823	2.57216	no
AKT2	0.250211	2.77961	94.6688	0.00151759	0.695491	no
AKT3	0.995252	17.7478	6.93641	0.044034	17.6635	no
AKTIP	0.318321	3.35842	13.3486	0.00287585	1.06906	no
AL020996.1	0.540055	14.5661	0.24183	0.0121056	7.86647	no
AL021068.1	0.347789	6.07792	2.60739	0.0197603	2.11384	no
AL022341.3	0.589996	25.7093	1.32964	0.0611692	15.1684	no
AL022344.7	0.544777	15.8956	0.322299	0.0247421	8.65956	no
AL031320.1	0.444241	33.4501	58.7281	0.0663931	14.8599	no
AL049840.1	0.486657	37.8859	1.09958	0.0531364	18.4374	no
AL133216.1	0.370525	23.8404	3.49248	0.0426931	8.83346	no
AL133458.1	0.61907	43.8567	2.3668	0.189357	27.1504	no
AL136115.1	1.63699	92.1106	0.974514	0.0417488	150.784	no
AL136419.6	0.357781	13.0539	0.216216	0.0128544	4.67045	no
AL137059.1	0.521471	49.8481	2.22169	0.0447618	25.9944	no
AL137127.1	0.661376	18.4667	3.13864	0.00410019	12.2135	no
AL137145.1	1.9343	169.602	0.350008	0.0948868	328.062	no
AL158147.2	0.774818	20.1377	2.34871	0.018473	15.6031	no
AL161645.1	1.24225	41.1789	5.23723	0.121344	51.1545	no
AL161915.1	0.481437	13.131	1.54118	0.0638392	6.32174	no
AL163953.3	1.00499	24.225	1.43744	0.0720705	24.3458	no
AL353671.4	0.753892	41.3412	2.54351	0.00641782	31.1668	no
AL353791.1	0.58346	39.106	2.26646	0.101181	22.8168	no
AL353898.2	0.719155	103.353	0.962817	0.0549195	74.3268	no
AL353898.3	0.35677	4.68841	4.64329	0.0112104	1.67268	no
AL355312.1	0.437778	7.26531	1.73476	0.0435709	3.18059	no
AL357515.1	0.68738	13.6228	3.09357	0.105058	9.36404	no
AL357673.1	0.498475	15.5427	3.09333	0.0635164	7.74766	no
AL358813.2	0.684515	20.7286	0.995543	0.0711133	14.189	no
AL391421.1	2.01041	206.762	0.717199	0.0332644	415.676	no
AL449209.1	0.723385	122.209	4.45079	0.0776282	88.4041	no
AL450992.2	0.793338	17.3152	25.6815	0.101538	13.7368	no
AL513477.1	0.712652	23.2118	0.357126	0.0409474	16.542	no
AL589743.1	1.20133	59.5605	0.489085	0.586178	71.5519	no
AL590822.1	1.03196	46.8335	0.239978	0.0286012	48.3305	no
AL590822.2	0.41448	5.8282	4.14749	0.01254	2.41567	no
AL591479.1	0.518514	16.4203	4.49601	0.0455059	8.51416	no
AL592284.1	0.650797	14.4967	0.749726	0.0607407	9.43442	no
AL627309.1	0.974601	128.61	5.4217	0.143398	125.343	no
AL645728.1	0.475994	7.74288	0.837341	0.0264015	3.68556	no
AL662800.1	1.89793	94.2722	17.2218	0.0480026	178.922	no
ALAD	0.316163	5.70219	25.2873	0.0104227	1.80282	no
ALAS1	0.427951	6.25884	47.24	0.0110383	2.67847	no
ALCAM	1.13291	56.2375	22.587	0.353406	63.7121	no
ALDH16A1	0.466913	12.5249	14.7084	0.00785607	5.84804	no
ALDH18A1	0.280141	4.11679	32.0434	0.00577363	1.15328	no
ALDH1A1	0.688431	21.0368	26.5138	0.156937	14.4824	no
ALDH1A2	1.03124	24.5447	1.44436	0.176077	25.3114	no
ALDH1A3	0.958629	15.7323	6.70378	0.216495	15.0814	no
ALDH1B1	0.678755	37.493	3.73175	0.168367	25.4486	no
ALDH1L2	0.497281	6.83619	12.2057	0.0440159	3.39951	no
ALDH2	0.372807	4.37854	167.121	0.0120684	1.63235	no
ALDH3A1	0.617058	13.0816	56.9425	0.0662951	8.07209	no
ALDH3A2	0.548205	7.15676	53.7222	0.0115123	3.92337	no
ALDH3B1	0.378571	6.12453	1.87039	0.0189622	2.31857	no
ALDH3B2	0.483491	16.1379	297.981	0.0101673	7.80254	no
ALDH4A1	0.445007	10.0384	13.9625	0.00862477	4.46714	no
ALDH5A1	0.527571	11.8768	23.617	0.0740537	6.26586	no
ALDH6A1	0.64111	9.53065	11.3667	0.0800038	6.1102	no
ALDH7A1	0.269251	2.89029	29.8135	0.00526084	0.778212	no
ALDH8A1	0.761216	121.974	0.74192	0.243336	92.8485	no
ALDH9A1	0.354456	4.40139	101.083	0.0085962	1.5601	no
ALDOA	0.478698	8.92871	523.447	0.0168271	4.27416	no
ALDOC	0.207002	2.25736	14.1488	0.00536117	0.467278	no
ALG1	0.229996	2.62598	7.11742	0.0033535	0.603964	no
ALG10	0.855893	13.5652	4.45378	0.0190108	11.6104	no
ALG10B	0.932803	15.4338	5.4815	0.0278194	14.3967	no
ALG11	0.522718	6.06846	2.04693	0.0110555	3.1721	no
ALG12	0.269714	3.17171	16.2187	0.00342129	0.855454	no
ALG13	0.370904	4.20421	11.734	0.0045686	1.55936	no
ALG14	0.277343	2.9373	28.0565	0.0158613	0.814637	no
ALG1L	0.788636	34.4674	4.45774	0.196237	27.1822	no
ALG1L13P	0.620184	23.0194	2.32902	0.120988	14.2763	no
ALG1L2	0.672951	19.6863	1.08366	0.0671774	13.2479	no
ALG1L8P	0.674386	16.7339	0.405871	0.0764317	11.2851	no
ALG1L9P	0.507668	12.0126	1.54846	0.0334667	6.09841	no
ALG2	0.15661	1.88769	14.93	0.00322819	0.295633	no
ALG3	0.431936	9.59395	46.2511	0.0049855	4.14397	no
ALG5	0.222789	2.40903	32.426	0.00747851	0.536708	no
ALG6	0.379506	4.17879	7.82328	0.00609498	1.58588	no
ALG8	0.210537	3.50983	19.3764	0.00467525	0.738949	no
ALG9	0.34285	5.23143	7.25848	0.00690727	1.7936	no
ALK	2.53159	354.55	1.23271	0.724287	897.576	no
ALKBH1	0.245	2.53206	6.76276	0.00615353	0.620353	no
ALKBH2	0.39388	4.6901	18.7985	0.00940781	1.84734	no
ALKBH3	0.230489	2.58352	16.7725	0.00414528	0.595474	no
ALKBH4	0.298616	3.92145	8.56043	0.00785266	1.17101	no
ALKBH5	0.251958	2.30489	26.0484	0.00293263	0.580735	no
ALKBH6	0.463831	21.1039	2.77169	0.0593412	9.78863	no
ALKBH7	0.5181	12.1449	62.7959	0.0281265	6.2923	no
ALKBH8	0.367498	5.05368	10.1487	0.00713771	1.85722	no
ALMS1	1.28474	54.9774	11.2613	0.0239223	70.6314	no
ALMS1-IT1	1.48151	188.556	0.807978	0.101748	279.347	no
ALOX12	0.436446	5.13549	5.39406	0.0353907	2.24136	no
ALOX12B	0.557709	12.6557	65.227	0.0406954	7.05823	no
ALOX12P2	0.928994	49.7618	2.67349	0.133644	46.2284	no
ALOX15	0.802709	17.0187	3.03997	0.259059	13.661	no
ALOX15B	2.15609	291.015	70.5694	0.946273	627.453	no
ALOX5	0.52471	10.6918	9.59507	0.0504898	5.61009	no
ALOX5AP	0.765731	23.3075	12.5464	0.256528	17.8472	no
ALOXE3	0.531152	11.311	37.0502	0.0268984	6.00786	no
ALPK1	0.556756	14.2962	10.2026	0.0101531	7.9595	no
ALPK2	0.652109	29.3791	0.805719	0.118484	19.1583	no
ALPK3	0.508143	10.5796	0.780456	0.0449826	5.37595	no
ALPL	0.607956	32.4354	3.03053	0.0492744	19.7193	no
ALS2	0.450006	7.77064	10.9965	0.00649906	3.49683	no
ALS2CL	0.539232	28.3592	56.9339	0.0835926	15.2922	no
ALS2CR11	1.52458	163.206	0.304855	0.20335	248.821	no
ALS2CR8	0.662273	32.0839	8.76751	0.0270953	21.2483	no
ALX1	0.863187	36.2511	0.919051	0.142047	31.2915	no
ALYREF	0.294491	3.96605	66.3973	0.00437011	1.16797	no
AMACR	0.501149	9.12834	2.31227	0.0470175	4.57465	no
AMBRA1	0.231468	3.1601	9.92607	0.00441098	0.73146	no
AMD1	0.169828	1.98829	75.7858	0.0023398	0.337668	no
AMDHD1	1.53088	59.4029	3.12858	0.520078	90.939	no
AMDHD2	0.422017	10.4521	7.1659	0.00990209	4.41095	no
AMER1	0.403626	8.79607	7.57936	0.0300142	3.55032	no
AMFR	0.191925	2.00585	40.1576	0.00198433	0.384973	no
AMH	1.19124	99.9579	1.23023	0.52767	119.074	no
AMICA1	0.639127	18.3944	23.2425	0.135582	11.7564	no
AMIGO1	0.581474	12.9129	5.78378	0.117906	7.5085	no
AMIGO2	0.416893	6.6921	7.12712	0.0433561	2.78989	no
AMMECR1	0.278859	2.82044	37.3695	0.00708036	0.786506	no
AMMECR1L	0.244986	4.225	15.6062	0.00458429	1.03507	no
AMN	0.673369	16.2782	3.82507	0.0696902	10.9612	no
AMN1	0.336301	4.22677	4.97355	0.0124399	1.42147	no
AMOT	0.783595	19.792	6.31385	0.0755018	15.5089	no
AMOTL1	0.283444	3.80078	31.4147	0.00606258	1.07731	no
AMOTL2	0.271634	3.67231	47.1398	0.00431541	0.997524	no
AMPD2	0.390007	4.69027	11.9448	0.00557095	1.82923	no
AMPD3	0.346359	4.16309	32.5566	0.0137133	1.44193	no
AMPH	0.949753	91.5358	0.650662	0.240171	86.9364	no
AMT	0.631916	82.1728	9.32184	0.19056	51.9263	no
AMY2B	0.846151	148.306	12.5296	0.130223	125.489	no
AMZ1	0.673493	27.062	0.212512	0.0524661	18.226	no
AMZ2	0.2325	2.23512	49.4289	0.00402931	0.519664	no
AMZ2P1	0.600165	10.7483	15.106	0.078887	6.45073	no
ANAPC1	0.315325	5.22962	8.62708	0.0048481	1.64903	no
ANAPC10	0.452838	4.27729	15.4145	0.0125655	1.93692	no
ANAPC11	0.344796	5.85663	23.067	0.00779736	2.01934	no
ANAPC13	0.231436	2.63933	48.3237	0.00509292	0.610834	no
ANAPC15	0.33583	3.85137	10.7205	0.0172563	1.2934	no
ANAPC16	0.23028	2.51863	25.415	0.00536263	0.57999	no
ANAPC2	0.425684	5.65767	34.9715	0.0106435	2.40838	no
ANAPC4	0.387175	8.07913	16.6629	0.00648293	3.12803	no
ANAPC5	0.294876	4.09453	94.4447	0.0031535	1.20738	no
ANAPC7	0.337249	4.66801	30.7592	0.00667742	1.57428	no
ANG	0.702969	11.8778	3.83932	0.0456742	8.34972	no
ANGEL1	0.342812	5.04842	11.599	0.0113152	1.73066	no
ANGEL2	0.43947	8.45476	41.4241	0.00939892	3.71561	no
ANGPT1	0.803872	22.666	2.32479	0.092066	18.2206	no
ANGPT2	0.756517	11.4614	3.05688	0.0331016	8.67071	no
ANGPTL1	2.05438	262.708	8.3731	0.212463	539.702	no
ANGPTL2	0.575237	8.44115	25.0609	0.045201	4.85566	no
ANGPTL4	0.545456	23.0567	34.8476	0.0327835	12.5764	no
ANGPTL6	0.520153	11.8136	0.393139	0.0271161	6.14487	no
ANK1	0.54768	13.0833	0.414379	0.0701701	7.16545	no
ANK2	1.63861	118.334	3.91709	0.179034	193.904	no
ANK3	0.73552	17.2471	24.0129	0.00850832	12.6856	no
ANKAR	1.69662	47.4568	2.22	0.0189058	80.5162	no
ANKDD1A	0.55477	13.48	4.40103	0.0594048	7.47831	no
ANKDD1B	1.20047	45.6627	0.578684	0.0444162	54.8168	no
ANKEF1	0.2609	3.14807	9.14661	0.00516704	0.821331	no
ANKFN1	1.37602	56.6988	1.21064	0.0737743	78.0185	no
ANKFY1	0.292066	6.58759	25.546	0.00866863	1.92401	no
ANKH	0.269523	3.44075	20.0671	0.00579188	0.927361	no
ANKHD1	1.05497	52.7378	1.10071	0.0254881	55.6371	no
ANKHD1-EIF4EBP3	0.845417	52.9787	0.677303	0.0405011	44.789	no
ANKIB1	0.39372	8.74316	21.204	0.00628989	3.44236	no
ANKK1	0.66867	11.1851	3.1606	0.112677	7.47912	no
ANKLE1	0.601302	24.0741	0.778065	0.0838188	14.4758	no
ANKLE2	0.23528	3.46064	78.8796	0.00267698	0.814218	no
ANKMY1	0.318242	6.7725	8.6098	0.0172478	2.1553	no
ANKMY2	0.415547	4.76639	12.4071	0.00827921	1.98066	no
ANKRA2	0.337417	4.84749	17.8153	0.00987428	1.63563	no
ANKRD10	0.474781	10.5187	53.8876	0.0105939	4.99406	no
ANKRD10-IT1	0.652902	36.4108	27.6186	0.0376544	23.7727	no
ANKRD11	0.346477	10.2141	51.8855	0.0109374	3.53893	no
ANKRD12	0.752278	24.9042	16.4703	0.0180881	18.7349	no
ANKRD13A	0.197946	3.19916	33.1662	0.0017929	0.633261	no
ANKRD13B	0.679076	17.218	7.12835	0.0616068	11.6923	no
ANKRD13C	0.299149	3.94623	15.7566	0.0021724	1.18051	no
ANKRD13D	0.382903	5.8418	31.0635	0.00884984	2.23684	no
ANKRD16	0.215019	3.33039	4.85422	0.00730968	0.716096	no
ANKRD17	0.323889	6.86154	37.582	0.00431996	2.22238	no
ANKRD18A	1.36364	316.427	2.49673	0.371283	431.494	no
ANKRD18B	1.26781	57.8798	0.901341	0.135476	73.3809	no
ANKRD18EP	0.392501	6.21019	4.23706	0.0217834	2.43751	no
ANKRD19P	0.681114	13.9172	0.934959	0.0919406	9.47918	no
ANKRD2	0.733743	59.8321	0.917847	0.102209	43.9014	no
ANKRD20A5P	1.58527	292.451	0.626998	0.632196	463.613	no
ANKRD22	0.265747	3.49021	50.5459	0.00811584	0.927512	no
ANKRD23	0.52758	50.2	1.12214	0.0784267	26.4845	no
ANKRD24	0.762133	33.2656	0.300658	0.183874	25.3528	no
ANKRD26	1.0255	43.183	7.16624	0.0167537	44.2842	no
ANKRD27	0.222182	3.41999	11.1919	0.00360833	0.759859	no
ANKRD28	0.453151	10.458	19.3136	0.00762559	4.73904	no
ANKRD29	0.431466	8.78143	8.61306	0.0402868	3.78889	no
ANKRD30BP3	0.806246	31.7298	0.83734	0.100608	25.582	no
ANKRD31	1.02206	31.1711	1.85588	0.310664	31.8588	no
ANKRD32	0.68519	15.4551	3.09983	0.014435	10.5897	no
ANKRD33B	1.01405	88.5346	0.785032	0.769099	89.7782	no
ANKRD34A	0.492951	11.2172	0.563908	0.0624791	5.52951	no
ANKRD35	0.572989	23.489	29.072	0.0852743	13.4589	no
ANKRD36	2.02376	441.798	4.28725	0.0303961	894.093	no
ANKRD36B	2.06847	454.014	3.80513	0.0226723	939.112	no
ANKRD36BP1	0.898574	28.6566	24.0722	0.0655716	25.7501	no
ANKRD36BP2	1.09861	114.222	2.85722	0.513618	125.486	no
ANKRD36C	2.38934	1273.87	6.51903	0.0454116	3043.71	no
ANKRD37	0.479497	5.73844	8.75923	0.0418807	2.75157	no
ANKRD39	0.391055	4.8767	1.15614	0.00943946	1.90706	no
ANKRD40	0.231844	3.19709	15.2805	0.00280093	0.741226	no
ANKRD42	0.289402	6.34519	6.84303	0.00808194	1.83631	no
ANKRD44	0.937666	25.3518	3.17218	0.0533838	23.7715	no
ANKRD46	0.319397	3.45613	5.67055	0.0069196	1.10388	no
ANKRD49	0.396575	5.96396	15.1098	0.01219	2.36515	no
ANKRD50	0.618838	10.9387	17.1936	0.0135419	6.76928	no
ANKRD52	0.414683	10.4375	16.0388	0.0166405	4.32824	no
ANKRD53	0.513712	6.32252	0.454194	0.0141406	3.24795	no
ANKRD54	0.392841	4.51823	39.4213	0.0122376	1.77494	no
ANKRD55	0.738373	30.1965	0.293881	0.188203	22.2963	no
ANKRD6	0.495588	12.0805	2.36038	0.0312646	5.98698	no
ANKRD61	0.914169	168.601	1.88972	0.0703095	154.13	no
ANKRD65	0.640956	15.6354	7.41028	0.0561085	10.0216	no
ANKRD9	0.512488	14.2351	18.9339	0.0247663	7.29531	no
ANKS1A	0.316168	6.0033	21.4711	0.00402799	1.89805	no
ANKS1B	1.56922	52.2975	1.27821	0.141456	82.0663	no
ANKS3	0.403553	15.8625	8.64146	0.0186661	6.40137	no
ANKS6	0.532396	12.3739	8.69309	0.0706646	6.58781	no
ANKZF1	0.467182	11.0233	25.4016	0.0343912	5.14988	no
ANLN	0.648995	16.5552	17.1663	0.0671022	10.7443	no
ANO1	0.595942	15.3908	16.795	0.108434	9.17202	no
ANO10	0.300028	4.08819	32.5426	0.00589209	1.22657	no
ANO2	1.41692	107.044	0.781607	0.0570542	151.673	no
ANO3	1.48448	108.365	0.294819	0.381284	160.866	no
ANO4	0.796098	72.3277	0.271784	0.27347	57.5799	no
ANO6	0.413315	4.38613	24.6534	0.00425509	1.81285	no
ANO7	1.08148	82.0937	0.243238	0.299078	88.7824	no
ANO7P1	0.33148	5.76786	5.43471	0.0139208	1.91193	no
ANO8	0.578022	12.9445	16.6043	0.0580452	7.4822	no
ANO9	0.632614	20.9799	46.8535	0.0816281	13.2722	no
ANP32A	0.257349	2.67227	123.979	0.00393654	0.687708	no
ANP32B	0.45585	9.99833	144.521	0.00695559	4.55773	no
ANP32E	0.43459	7.83244	32.2777	0.0178553	3.40391	no
ANPEP	0.635172	18.0486	21.1068	0.0778235	11.464	no
ANTXR1	0.454738	5.14457	55.5033	0.0267792	2.33943	no
ANTXR2	0.706513	17.5979	24.188	0.0505536	12.4331	no
ANXA1	0.898961	15.6093	416.363	0.271538	14.0322	no
ANXA11	0.172035	2.45721	91.3736	0.00403873	0.422725	no
ANXA2	0.229533	2.48613	797.559	0.00774024	0.57065	no
ANXA2P2	0.271881	2.40297	3.23777	0.0136937	0.653322	no
ANXA2R	0.720969	17.596	2.5066	0.0934776	12.6862	no
ANXA3	0.781785	11.9449	13.2556	0.152913	9.33836	no
ANXA4	0.257216	3.10658	28.2252	0.00343579	0.799062	no
ANXA5	0.285056	2.8605	150.578	0.00840398	0.815402	no
ANXA6	0.51541	10.8056	32.2395	0.0624951	5.56933	no
ANXA7	0.175503	1.85721	94.0239	0.0022082	0.325946	no
ANXA8	0.973096	20.6972	0.433748	0.0571441	20.1403	no
ANXA8L1	0.675315	118.45	19.1717	0.333784	79.9912	no
ANXA8L2	0.196754	2.34194	22.4361	0.00523	0.460787	no
ANXA9	0.385337	5.83584	48.3871	0.0276551	2.24876	no
AOAH	0.616865	19.3036	5.28461	0.0981011	11.9077	no
AOC2	0.457344	8.75607	1.42208	0.0475089	4.00453	no
AOC3	0.772346	26.0383	7.62708	0.180955	20.1106	no
AOX1	1.03301	121.48	13.3896	0.18221	125.491	no
AP000251.2	1.21766	53.8832	0.479018	0.461703	65.6115	no
AP000322.53	0.711909	21.0821	5.16383	0.190885	15.0085	no
AP000322.54	0.54056	10.5375	1.87753	0.0336828	5.69618	no
AP000330.8	0.915234	95.0741	0.373873	0.5902	87.0151	no
AP000350.4	0.671608	61.9746	1.92459	0.209502	41.6226	no
AP000442.1	0.390809	7.07088	1.37482	0.0143706	2.76336	no
AP000473.5	1.11958	170.677	3.28417	0.348204	191.087	no
AP000473.8	1.27028	219.068	1.90896	0.465771	278.276	no
AP000487.5	0.671092	49.1257	5.82047	0.030344	32.9678	no
AP000487.6	1.03501	27.6101	1.09499	0.0264092	28.5768	no
AP000525.9	1.30377	59.3098	5.13469	0.611951	77.3264	no
AP000640.10	1.03894	36.8442	0.778987	0.0155141	38.2789	no
AP000662.4	1.07533	115.04	2.37575	0.321181	123.706	no
AP000679.2	0.397628	4.57543	0.461538	0.0174107	1.81932	no
AP000688.14	0.59433	8.2091	0.868879	0.0629357	4.87891	no
AP000688.8	0.77115	26.4927	2.85217	0.319376	20.4298	no
AP000692.9	1.10226	84.525	3.14427	0.0349812	93.1687	no
AP000769.1	1.3938	29.8034	3.24749	0.359876	41.5399	no
AP001007.1	0.463075	7.94849	27.539	0.0143117	3.68074	no
AP001046.5	0.576286	6.37028	3.44585	0.0439891	3.6711	no
AP001053.11	0.985074	44.7062	17.4668	0.24626	44.0389	no
AP001055.1	0.569649	45.0306	1.45248	0.0643658	25.6517	no
AP001055.6	0.434972	5.56199	2.21077	0.0137475	2.41931	no
AP001062.7	0.505572	16.9131	0.705476	0.0897116	8.55081	no
AP001189.4	0.732578	20.8392	0.838775	0.128505	15.2663	no
AP001205.1	0.367616	27.9687	16.8274	0.0302657	10.2817	no
AP001258.4	0.495793	7.09096	6.1323	0.0363956	3.51565	no
AP001347.6	0.931137	45.5135	1.00604	0.134357	42.3793	no
AP001372.2	0.336716	3.93957	3.589	0.0181699	1.32652	no
AP001432.14	1.15522	72.1362	1.91041	0.109404	83.3331	no
AP001462.6	0.413799	5.78855	2.21657	0.0208202	2.3953	no
AP001468.1	0.77345	97.5289	4.39215	0.133068	75.4337	no
AP001469.7	0.478925	8.79777	1.69132	0.0201245	4.21347	no
AP001469.9	0.711864	35.1137	1.15687	0.0953031	24.9962	no
AP001596.6	0.771868	16.4094	0.721546	0.115424	12.6659	no
AP001623.1	0.502458	35.1137	13.009	0.0618145	17.6432	no
AP001625.6	0.788275	15.9999	1.33295	0.118578	12.6123	no
AP001816.1	0.531734	7.45046	10.3169	0.0371098	3.96166	no
AP001877.1	0.682175	24.3822	4.94076	0.0264156	16.6329	no
AP003068.18	0.427038	9.3724	2.71442	0.0316972	4.00237	no
AP003068.23	0.445376	11.7125	1.59559	0.0682685	5.21646	no
AP003068.6	0.455777	8.50122	2.67196	0.0276234	3.87465	no
AP003733.1	1.12529	51.3433	0.406666	0.0253535	57.776	no
AP003774.4	0.721691	22.9266	0.229883	0.0956653	16.5459	no
AP006216.10	0.520157	7.72465	1.77325	0.0250562	4.01803	no
AP006216.11	0.386759	7.88519	4.43417	0.0175949	3.04967	no
AP006222.2	0.635281	78.8365	1.78451	0.18087	50.0833	no
AP006621.1	0.513176	11.6477	6.6184	0.0907087	5.9773	no
AP006621.5	0.472143	12.8122	8.4429	0.0626579	6.04918	no
AP006621.6	0.775003	71.5212	4.7696	0.346771	55.4291	no
AP006621.9	0.88073	73.3356	2.01642	0.449307	64.5889	no
AP1AR	0.339467	5.86061	17.5256	0.00899698	1.98949	no
AP1B1	0.346301	4.62985	44.7959	0.00338925	1.60332	no
AP1G1	0.180413	2.92015	60.3151	0.00178811	0.526834	no
AP1G2	0.48218	9.43754	23.7647	0.022796	4.55059	no
AP1M1	0.301806	4.68841	26.3398	0.00266989	1.41499	no
AP1M2	0.220743	2.78417	29.7174	0.00376102	0.614586	no
AP1S1	0.343119	3.85589	109.712	0.0100913	1.32303	no
AP1S2	0.425791	4.91125	37.304	0.00815356	2.09116	no
AP1S3	0.285982	3.6059	6.68521	0.00886132	1.03122	no
AP2A1	0.397312	8.33827	42.0738	0.00375281	3.31289	no
AP2A2	0.255275	2.56583	19.5588	0.00270694	0.654991	no
AP2B1	0.256952	3.02195	59.3925	0.00424145	0.776498	no
AP2M1	0.328191	4.69959	129.073	0.00385065	1.54236	no
AP2S1	0.334233	6.63633	133.154	0.00604197	2.21808	no
AP3B1	0.266246	3.3139	35.139	0.0018182	0.882313	no
AP3B2	0.691755	15.0113	2.74377	0.114654	10.3841	no
AP3D1	0.401734	6.98662	30.9382	0.00425745	2.80677	no
AP3M1	0.163722	2.0125	35.0651	0.00172614	0.329491	no
AP3M2	0.330599	7.06674	7.46193	0.00989951	2.33626	no
AP3S1	0.171246	1.98257	64.3688	0.00487117	0.339508	no
AP3S2	0.293051	5.08516	35.8197	0.0111793	1.49021	no
AP4B1	0.333816	4.72644	10.8922	0.0120496	1.57776	no
AP4B1-AS1	0.487646	62.8519	0.789602	0.0502481	30.6495	no
AP4E1	0.258966	5.47204	11.5239	0.00316078	1.41707	no
AP4M1	0.413195	4.15644	10.2484	0.00566349	1.71742	no
AP4S1	0.585017	6.14083	5.22471	0.00847245	3.59249	no
AP5B1	0.371065	5.60555	6.99282	0.0105011	2.08002	no
AP5M1	0.305336	3.52342	69.8252	0.00406733	1.07583	no
AP5S1	0.293909	3.33681	9.87553	0.00503107	0.980721	no
AP5Z1	0.422494	6.91206	15.0357	0.00823162	2.9203	no
APAF1	0.518932	16.3914	4.20806	0.0172636	8.50602	no
APBA1	0.55591	17.9894	2.21439	0.0759831	10.0005	no
APBA2	0.599352	8.49271	1.85636	0.0759712	5.09012	no
APBA3	0.375357	5.05683	11.3012	0.00974233	1.89812	no
APBB1	0.444926	5.76272	11.7388	0.0323717	2.56398	no
APBB1IP	0.733605	44.2798	4.68839	0.252969	32.4839	no
APBB2	0.429128	6.04424	27.2088	0.00610371	2.59375	no
APBB3	0.501672	21.7851	19.0054	0.043821	10.929	no
APC	0.585429	12.9246	9.86177	0.00741418	7.56641	no
APC2	0.409638	6.74185	0.267407	0.0266739	2.76172	no
APCDD1	0.565542	8.56462	589.392	0.0253662	4.84365	no
APCDD1L	3.21872	881.63	5.28077	1.7776	2837.72	no
APCDD1L-AS1	2.76112	680.387	3.25144	1.31871	1878.63	no
APEH	0.328487	4.05005	53.556	0.0031168	1.33039	no
APEX1	0.272902	3.50188	236.192	0.00316168	0.955668	no
APEX2	0.268377	3.27498	18.2276	0.00159775	0.878929	no
APH1A	0.278479	3.58325	133.152	0.00278616	0.997859	no
APH1B	0.584808	5.44016	12.9134	0.0146694	3.18145	no
API5	0.194148	2.7925	48.2892	0.00229722	0.542158	no
APIP	0.296731	2.60975	11.7904	0.00613117	0.774392	no
APITD1	0.555815	7.67441	3.27109	0.0375952	4.26555	no
APLF	0.914089	11.2031	9.86973	0.00654062	10.2406	no
APLN	0.883159	21.2827	2.03263	0.144556	18.796	no
APLNR	0.692079	11.7536	7.13949	0.075623	8.13442	no
APLP1	1.65544	336.821	2.1424	0.700209	557.587	no
APLP2	0.235744	3.22431	100.482	0.00357409	0.760114	no
APMAP	1.63699	27.0683	56.5177	0.306066	44.3105	no
APOA1BP	0.311967	3.33	41.8797	0.00548598	1.03885	no
APOB	2.45709	179.724	0.78244	0.439875	441.599	no
APOBEC3A	1.28578	512.292	12.1566	0.97929	658.693	no
APOBEC3B	0.684617	67.0317	4.96216	0.10342	45.8911	no
APOBEC3C	0.512898	9.87968	20.4511	0.0147993	5.06727	no
APOBEC3D	0.770287	25.1131	2.73721	0.163916	19.3443	no
APOBEC3F	0.491658	10.8947	1.69892	0.0371715	5.35647	no
APOBEC3G	0.854588	62.9225	4.58775	0.165128	53.7728	no
APOBEC3H	1.12451	71.887	0.817212	0.314172	80.8373	no
APOBR	0.727006	25.3487	4.29342	0.0798581	18.4286	no
APOC1	1.40664	177.633	32.1701	0.956729	249.866	no
APOD	0.688084	22.367	55.1488	0.225137	15.3904	no
APOE	1.12632	50.3849	180.02	0.260552	56.7494	no
APOL1	0.795924	22.1449	81.1518	0.0863606	17.6256	no
APOL2	0.511482	7.66376	51.9215	0.0154971	3.91988	no
APOL3	0.616283	16.1197	63.4229	0.0689247	9.93431	no
APOL4	0.532114	9.12755	12.225	0.0444439	4.8569	no
APOL6	0.62267	14.1868	11.9841	0.0890526	8.83369	no
APOLD1	0.413075	5.34918	6.06319	0.0184158	2.20961	no
APOM	0.373046	3.74811	4.22361	0.0183572	1.39822	no
APOO	0.375448	4.39771	8.52408	0.0214736	1.65111	no
APOOL	0.427739	6.61599	8.76064	0.00866304	2.82992	no
APOPT1	0.279749	2.84316	8.42459	0.00902856	0.795373	no
APP	0.353238	5.26727	220.468	0.00995779	1.8606	no
APPBP2	0.399623	6.26743	15.7814	0.00479825	2.50461	no
APPL1	0.43965	8.1534	28.25	0.00620413	3.58464	no
APPL2	0.24881	2.53887	98.9733	0.00409675	0.631697	no
APRT	0.345362	5.39589	140.328	0.0106683	1.86354	no
APTX	0.166514	1.97904	34.539	0.00281156	0.329537	no
AQP1	0.438901	5.27324	75.9741	0.020966	2.31443	no
AQP11	0.963833	28.6085	1.30129	0.0222623	27.5738	no
AQP3	0.62011	13.0551	765.256	0.0108756	8.0956	no
AQP5	1.02249	43.6109	37.6877	0.398405	44.5915	no
AQP7	1.65287	221.971	0.83184	0.542624	366.889	no
AQP8	0.845771	15.7088	0.254378	0.0723673	13.286	no
AQP9	0.559502	8.94292	14.891	0.0293677	5.00359	no
AQPEP	2.0477	1080.78	0.936317	0.79178	2213.1	no
AQR	0.331773	5.63068	19.0839	0.00248424	1.86811	no
AR	0.907178	56.528	24.4954	0.316659	51.281	no
ARAF	0.332699	5.19994	29.4207	0.0015611	1.73001	no
ARAP1	0.329203	4.86976	27.1897	0.00625738	1.60314	no
ARAP2	0.611883	13.5185	39.8206	0.00979266	8.27176	no
ARAP3	0.503208	7.32107	4.08937	0.0247446	3.68402	no
ARC	0.945285	122.675	7.42406	0.246148	115.963	no
ARCN1	0.16293	2.02495	42.1149	0.00131828	0.329926	no
AREG	0.670765	36.2862	1.88676	0.069734	24.3396	no
AREL1	0.208201	3.72047	19.9321	0.00286373	0.774604	no
ARF1	0.253765	3.49669	444.258	0.00243912	0.887338	no
ARF3	0.32099	3.92999	342.543	0.00212593	1.26149	no
ARF4	0.230193	3.41807	200.843	0.00405614	0.786817	no
ARF5	0.274533	3.61091	128.549	0.00323758	0.991312	no
ARF6	0.302776	3.87552	152.625	0.00196164	1.17341	no
ARFGAP1	0.383909	5.75842	23.3518	0.00606642	2.21071	no
ARFGAP2	0.2148	3.1633	81.7486	0.00306863	0.679478	no
ARFGAP3	0.278693	2.5823	18.8643	0.00313937	0.71967	no
ARFGEF1	0.409238	8.18581	34.8521	0.00558313	3.34994	no
ARFGEF2	0.38348	8.41142	26.6154	0.00901336	3.22562	no
ARFIP1	0.279919	3.31594	23.2763	0.00239286	0.928193	no
ARFIP2	0.219162	2.52707	36.7324	0.00221583	0.553838	no
ARFRP1	0.283142	3.4289	33.2179	0.00324396	0.970867	no
ARG1	0.669174	16.8467	252.222	0.0862962	11.2734	no
ARG2	0.55999	6.1947	5.72315	0.0888098	3.46897	no
ARGLU1	0.352448	11.7244	372.651	0.0213796	4.13225	no
ARHGAP1	0.363714	5.4036	53.8842	0.00311912	1.96536	no
ARHGAP10	0.750437	7.20427	9.73292	0.00394271	5.40635	no
ARHGAP11A	0.495625	13.8878	19.1155	0.0313833	6.88315	no
ARHGAP11B	0.59625	24.9324	7.27423	0.0430677	14.8659	no
ARHGAP12	0.861958	15.8196	15.9552	0.00907456	13.6358	no
ARHGAP15	0.818145	24.1718	3.08575	0.21126	19.776	no
ARHGAP17	0.209151	3.07259	13.7437	0.00295809	0.642637	no
ARHGAP18	0.644306	8.99607	10.9229	0.0125303	5.79623	no
ARHGAP19	0.401418	6.79861	2.10479	0.0182548	2.72909	no
ARHGAP20	1.1888	25.1408	0.722234	0.0862175	29.8874	no
ARHGAP21	0.369183	4.93271	25.1329	0.00551261	1.82107	no
ARHGAP22	0.382768	4.08744	3.95338	0.0199029	1.56454	no
ARHGAP23	0.443904	6.10483	46.5588	0.013531	2.70996	no
ARHGAP23P1	0.525542	6.5238	1.46567	0.0587203	3.42853	no
ARHGAP24	0.707829	10.2709	3.65486	0.0153131	7.27007	no
ARHGAP25	0.606779	12.775	5.31444	0.0453616	7.75161	no
ARHGAP26	0.503509	10.3717	3.83719	0.0156194	5.22222	no
ARHGAP27	0.34016	5.17294	28.6395	0.00718574	1.75963	no
ARHGAP28	0.741002	19.1843	3.2775	0.141844	14.2156	no
ARHGAP29	0.76201	14.9544	30.5977	0.0294588	11.3954	no
ARHGAP30	0.588565	10.1387	17.2797	0.0359913	5.96731	no
ARHGAP31	0.525864	6.70146	8.30169	0.0199593	3.52406	no
ARHGAP32	0.246921	4.59628	15.4772	0.00571354	1.13492	no
ARHGAP33	1.11909	121.667	3.70557	0.142968	136.156	no
ARHGAP35	0.350619	8.72687	28.1523	0.0163565	3.05981	no
ARHGAP39	0.583183	14.8201	7.02087	0.032953	8.64281	no
ARHGAP4	0.989554	24.1001	10.4819	0.128955	23.8484	no
ARHGAP40	0.701807	17.7944	11.8035	0.150143	12.4882	no
ARHGAP42	0.864934	12.3684	5.45346	0.0335486	10.6978	no
ARHGAP44	0.676865	17.0024	1.06054	0.172531	11.5084	no
ARHGAP5	0.588616	8.76456	32.19	0.00522587	5.15896	no
ARHGAP5-AS1	0.373185	5.91641	2.70429	0.0160161	2.20791	no
ARHGAP6	0.773512	14.9067	1.0152	0.0980082	11.5305	no
ARHGAP8	0.913036	37.3288	0.616061	0.380131	34.0825	no
ARHGAP9	0.882066	19.914	5.44949	0.195627	17.5655	no
ARHGDIA	0.396631	20.701	130.218	0.00246906	8.21067	no
ARHGDIB	0.724545	10.5358	241.469	0.060992	7.6337	no
ARHGEF1	0.550858	17.3881	40.7704	0.0126595	9.57835	no
ARHGEF10	0.586806	9.67235	5.03904	0.0158781	5.67579	no
ARHGEF10L	0.313956	4.31217	12.5289	0.00820032	1.35383	no
ARHGEF11	0.321148	7.48862	15.5325	0.00759822	2.40495	no
ARHGEF12	0.51385	9.53055	72.3796	0.00943909	4.89727	no
ARHGEF15	0.442304	5.85797	2.86999	0.024772	2.591	no
ARHGEF16	0.78854	25.8457	8.25978	0.0995688	20.3804	no
ARHGEF17	0.455106	14.4998	10.1186	0.0277318	6.59894	no
ARHGEF18	0.359235	5.49184	6.95842	0.00330421	1.97286	no
ARHGEF19	0.60783	11.5044	16.088	0.0228668	6.99269	no
ARHGEF2	0.327525	3.51089	12.589	0.00677042	1.1499	no
ARHGEF25	0.439411	6.65778	2.12635	0.0415944	2.9255	no
ARHGEF26	0.788297	31.2321	8.96106	0.0858513	24.6202	no
ARHGEF26-AS1	0.933987	35.6071	2.65338	0.180901	33.2565	no
ARHGEF28	0.934957	20.2108	8.10697	0.019764	18.8962	no
ARHGEF3	0.220618	3.37887	15.4476	0.00412225	0.745438	no
ARHGEF33	1.14765	44.2131	0.541093	0.083383	50.7414	no
ARHGEF35	0.461008	169.039	7.09198	0.134813	77.9284	no
ARHGEF37	0.402154	7.83523	38.8837	0.0217412	3.15097	no
ARHGEF39	0.607351	19.4049	1.32275	0.062717	11.7856	no
ARHGEF4	0.408246	10.1573	38.172	0.0203343	4.1467	no
ARHGEF40	0.42149	7.21478	6.83974	0.0213187	3.04096	no
ARHGEF5	0.243572	3.3426	16.2256	0.00465449	0.814166	no
ARHGEF6	0.713493	15.78	22.2957	0.0560051	11.2589	no
ARHGEF7	0.340142	7.67236	15.4568	0.00838969	2.60969	no
ARHGEF9	0.360013	6.36023	19.1399	0.0117626	2.28976	no
ARID1A	0.434326	7.4977	16.337	0.0113295	3.25645	no
ARID1B	0.274082	6.63996	18.8306	0.00667369	1.81989	no
ARID2	0.583398	14.8274	8.34053	0.00686972	8.65026	no
ARID3A	0.441506	5.52948	3.84866	0.0121676	2.4413	no
ARID3B	0.43575	6.38858	2.72661	0.00927001	2.78383	no
ARID3C	1.38837	99.3249	0.448621	0.431117	137.9	no
ARID4A	0.645693	25.5131	9.25012	0.0120233	16.4737	no
ARID4B	0.484382	11.7258	19.4367	0.00762702	5.67978	no
ARID5A	0.605403	11.4671	8.01981	0.0369568	6.94221	no
ARID5B	0.373843	4.98479	20.2318	0.0090787	1.86353	no
ARIH1	0.321948	5.80199	18.885	0.00607354	1.86794	no
ARIH2	0.203161	3.28748	42.858	0.00268173	0.667887	no
ARIH2OS	0.486437	6.66039	1.40605	0.0513678	3.23986	no
ARL1	0.227649	2.35805	110.797	0.00311293	0.536807	no
ARL10	0.494919	10.7426	3.85051	0.0570958	5.31672	no
ARL11	0.412326	7.27491	24.1057	0.0359946	2.99963	no
ARL13A	1.07814	74.7721	0.943754	0.0379969	80.6151	no
ARL13B	0.353502	7.60652	8.26574	0.00963884	2.68892	no
ARL14EP	0.313458	3.71966	18.7868	0.00369839	1.16596	no
ARL15	1.06002	15.5973	66.2401	0.0683939	16.5336	no
ARL16	0.318942	3.46263	31.7586	0.0101362	1.10438	no
ARL17A	0.870259	159.271	1.07507	0.13035	138.607	no
ARL17B	0.801475	24.7596	2.81345	0.121	19.8442	no
ARL2	0.297942	4.84343	16.3833	0.00542088	1.44306	no
ARL2BP	0.173705	1.83689	44.4628	0.00310057	0.319078	no
ARL2BPP10	0.875412	62.8519	1.48198	0.0759597	55.0214	no
ARL3	0.343836	4.20597	23.4987	0.010937	1.44617	no
ARL4A	0.543228	6.96329	53.6703	0.0196181	3.78265	no
ARL4C	0.571292	8.85561	51.6289	0.0275298	5.05914	no
ARL4D	0.555977	7.68733	31.2781	0.0481557	4.27398	no
ARL5A	0.387911	5.59804	228.586	0.0089367	2.17154	no
ARL5B	0.266718	2.97329	17.3001	0.00455966	0.793029	no
ARL5B-AS1	0.938804	65.0193	1.41674	0.0177256	61.0403	no
ARL6	0.558021	8.49968	5.15813	0.0203747	4.743	no
ARL6IP1	0.247355	2.59186	91.7479	0.00512848	0.641108	no
ARL6IP4	0.508559	38.5977	1.0661	0.0334564	19.6292	no
ARL6IP5	0.35905	4.21704	369.833	0.0154217	1.51413	no
ARL6IP6	0.25337	2.77386	29.4613	0.0040609	0.702813	no
ARL8A	0.395104	4.81553	29.1473	0.00806822	1.90264	no
ARL8B	0.160727	2.27086	117.261	0.00238259	0.364988	no
ARL9	0.619474	13.7446	2.62379	0.137116	8.51443	no
ARMC1	0.209283	2.87867	27.5838	0.00315489	0.602458	no
ARMC10	0.210003	2.48333	28.8012	0.00364392	0.521507	no
ARMC12	0.656055	49.8984	0.689434	0.126872	32.7361	no
ARMC2	0.658542	11.7035	2.2469	0.030222	7.70723	no
ARMC5	0.463046	13.6899	9.86834	0.0110159	6.33907	no
ARMC6	0.369052	6.55254	13.6392	0.00429888	2.41823	no
ARMC7	0.265666	3.3695	15.1716	0.00419794	0.895162	no
ARMC8	0.286538	4.21999	15.0881	0.00166943	1.20919	no
ARMC9	0.48855	8.59732	2.07734	0.0243688	4.20022	no
ARMCX1	0.563235	5.82687	11.743	0.0245337	3.2819	no
ARMCX2	0.881855	14.289	17.9517	0.114984	12.6008	no
ARMCX3	0.537196	6.98075	12.4516	0.021728	3.75003	no
ARMCX4	0.539887	29.9597	1.86925	0.0547352	16.1749	no
ARMCX5	0.384013	5.60401	8.24681	0.00529058	2.15201	no
ARMCX6	0.367203	4.52763	7.36529	0.0216229	1.66256	no
ARNT	0.331253	4.30356	44.2425	0.00376538	1.42557	no
ARNT2	0.786284	17.1948	2.10104	0.141726	13.52	no
ARNTL	0.552372	7.03049	6.85657	0.0150179	3.88344	no
ARNTL2	0.349894	4.78806	50.8058	0.0188264	1.67531	no
ARPC1A	0.223607	2.6335	90.7874	0.00278891	0.588868	no
ARPC1B	0.489996	8.31115	26.9194	0.023043	4.07243	no
ARPC2	0.223171	2.42805	354.358	0.00446749	0.541871	no
ARPC3	0.352599	3.82472	216.389	0.00904405	1.34859	no
ARPC4	0.257052	3.28142	84.5436	0.0037161	0.843494	no
ARPC5	0.226484	2.4647	60.1409	0.00339471	0.558215	no
ARPC5L	0.3225	4.89306	39.3019	0.00515648	1.57801	no
ARPP19	0.189029	2.51333	525.067	0.0018557	0.475091	no
ARR3	0.975269	49.8481	2.03381	0.0560663	48.6153	no
ARRB1	0.257198	3.458	19.1738	0.00646009	0.889391	no
ARRB2	0.429679	5.72896	24.2399	0.0136043	2.46161	no
ARRDC1	0.499757	10.0352	54.1986	0.00901903	5.01516	no
ARRDC2	0.389487	5.16248	18.3277	0.0132961	2.01072	no
ARRDC3	0.3471	3.84841	84.9898	0.00358189	1.33578	no
ARRDC4	0.287281	2.99119	57.7762	0.00825861	0.85931	no
ARRDC5	0.792344	39.8985	0.419608	0.0571234	31.6134	no
ARSA	0.520286	21.004	15.9026	0.00928744	10.9281	no
ARSB	0.321829	6.0774	16.8601	0.0183644	1.95588	no
ARSD	0.302031	4.36052	8.12249	0.0102934	1.31701	no
ARSE	0.690736	12.5252	0.359722	0.0832245	8.6516	no
ARSF	0.820246	23.8098	5.81795	0.28075	19.5299	no
ARSG	0.41139	5.07505	2.79652	0.010262	2.08782	no
ARSH	0.724799	17.2371	0.317488	0.125489	12.4934	no
ARSI	0.65251	9.76425	23.2813	0.0703214	6.37127	no
ARSJ	0.511843	5.8483	3.8319	0.0623627	2.99341	no
ARSK	0.407938	6.31069	7.06005	0.0167856	2.57437	no
ARTN	0.905257	70.9814	2.21515	0.235595	64.2564	no
ARV1	0.26378	2.40094	31.1803	0.00723703	0.633318	no
ARVCF	0.500696	13.2727	6.28246	0.0406881	6.64558	no
ASAH1	0.356734	3.56472	84.9224	0.00292457	1.27166	no
ASAH2	0.475976	17.0733	0.422644	0.0516442	8.12645	no
ASAH2B	0.274751	4.88424	9.75016	0.0138947	1.34195	no
ASAP1	0.308839	5.47984	27.4352	0.00757955	1.69239	no
ASAP2	0.50027	6.55934	4.91995	0.0148912	3.28144	no
ASAP3	0.282818	3.25718	41.8002	0.00518649	0.921188	no
ASB1	0.271561	4.41371	7.50423	0.00596305	1.19859	no
ASB13	0.366545	4.64275	10.2404	0.00924073	1.70178	no
ASB14	1.20099	64.056	1.7221	0.0240759	76.9308	no
ASB16	0.541322	142.811	1.7792	0.124606	77.307	no
ASB16-AS1	0.527308	9.37373	16.9069	0.0499003	4.94284	no
ASB2	0.892116	20.3618	2.70206	0.081166	18.1651	no
ASB6	0.291343	3.54383	14.1351	0.00416771	1.03247	no
ASB7	0.217023	3.25766	7.45069	0.00287002	0.706987	no
ASB8	0.168046	2.4782	49.7349	0.00198613	0.416453	no
ASB9	0.586789	12.4928	1.1471	0.0693856	7.33064	no
ASCC1	0.15475	1.91137	15.8319	0.00227769	0.295785	no
ASCC2	0.268825	3.69861	38.0819	0.00149252	0.99428	no
ASCC3	0.359884	7.28938	16.8584	0.00490641	2.62333	no
ASCL2	0.685715	13.4018	9.77295	0.0733724	9.18978	no
ASCL4	2.69967	241.236	0.887934	0.870896	651.257	no
ASF1A	0.286972	3.19346	19.106	0.00333496	0.916435	no
ASF1B	0.62702	19.5877	27.3518	0.0323766	12.2819	no
ASGR1	0.533589	7.53826	1.41202	0.0661098	4.02234	no
ASGR2	0.589205	14.5395	1.97961	0.130113	8.56676	no
ASH1L	0.645363	20.5725	39.4623	0.0191737	13.2767	no
ASH1L-AS1	0.348066	6.73679	3.55984	0.0226436	2.34485	no
ASH2L	0.224945	3.00818	15.8095	0.00310492	0.676673	no
ASIC1	0.735004	21.6843	1.07697	0.156055	15.938	no
ASIC3	0.731277	56.9316	2.30607	0.200528	41.6327	no
ASL	0.269479	3.67254	7.74504	0.00663616	0.98967	no
ASNA1	0.29062	4.04959	56.8333	0.00296727	1.17689	no
ASNS	0.416688	5.54918	18.4886	0.0169009	2.31228	no
ASNSD1	0.15866	1.80564	30.4427	0.00165128	0.286484	no
ASPA	0.901524	16.834	1.73362	0.0678961	15.1763	no
ASPG	0.611315	9.10776	11.5328	0.061734	5.56771	no
ASPH	0.578905	9.57351	38.2313	0.0228893	5.54215	no
ASPHD1	1.19287	64.0995	1.99096	0.371758	76.4625	no
ASPHD2	0.388789	4.78365	3.11621	0.0274329	1.85983	no
ASPM	0.723287	37.4804	16.0221	0.0927592	27.1091	no
ASPN	0.977538	31.084	21.4257	0.237421	30.3858	no
ASPRV1	0.43321	6.89239	760.793	0.0277785	2.98585	no
ASPSCR1	0.353332	4.36811	24.6907	0.00568196	1.54339	no
ASRGL1	0.920487	29.7347	0.941271	0.230704	27.3704	no
ASS1	0.788615	10.3294	93.5126	0.0921222	8.14592	no
ASS1P12	0.336773	8.19125	2.00692	0.0237631	2.75859	no
ASTE1	0.449456	5.48326	12.1328	0.00848558	2.46449	no
ASTL	0.526033	7.44997	0.48948	0.0295066	3.91893	no
ASTN1	1.29386	84.3596	0.141287	0.217922	109.149	no
ASTN2	1.02258	70.1733	1.07018	0.75231	71.7579	no
ASUN	0.174868	2.07101	19.9743	0.00270406	0.362153	no
ASXL1	0.30539	7.58825	13.6735	0.00739896	2.31738	no
ASXL2	0.258352	4.82877	38.6048	0.00591561	1.24752	no
ASXL3	1.26784	117.726	0.0857077	0.365878	149.257	no
ATAD1	0.267046	3.30701	27.4157	0.00304445	0.883124	no
ATAD2	0.771648	33.4373	18.6634	0.106524	25.8018	no
ATAD2B	0.954458	25.0062	11.6197	0.00496288	23.8674	no
ATAD3A	0.457519	11.5128	26.5222	0.0065641	5.26734	no
ATAD3B	0.59552	11.4663	9.4692	0.0480227	6.82841	no
ATAD3C	0.76073	15.628	1.1348	0.148466	11.8887	no
ATAD5	0.635519	28.9916	5.43094	0.0317855	18.4247	no
ATAT1	0.518819	11.1129	7.66207	0.0356783	5.7656	no
ATE1	0.240886	3.50315	43.2374	0.00344392	0.84386	no
ATF1	0.188976	2.47763	18.1488	0.00276768	0.468211	no
ATF2	0.439203	5.84206	25.3779	0.00448	2.56585	no
ATF3	0.774845	23.7753	16.7429	0.102101	18.4222	no
ATF4	0.286461	3.56992	188.365	0.0038152	1.02264	no
ATF5	0.518536	32.3977	50.1096	0.0121182	16.7994	no
ATF6	0.328708	3.86947	21.0287	0.00205501	1.27193	no
ATF6B	0.383349	6.56745	52.2854	0.00316349	2.51763	no
ATF7	0.346706	4.33589	13.3904	0.00711139	1.50328	no
ATF7IP	0.612674	11.5782	30.68	0.0155978	7.09367	no
ATF7IP2	1.34041	42.1963	4.39405	0.0415161	56.5602	no
ATG10	0.434592	4.21762	7.47563	0.0180536	1.83294	no
ATG12	0.364534	3.82496	86.2058	0.00354116	1.39433	no
ATG13	0.204707	2.29612	57.8946	0.00178606	0.470031	no
ATG14	0.358837	8.3249	18.0523	0.0106735	2.98728	no
ATG16L1	0.318568	5.52509	20.8443	0.00563996	1.76012	no
ATG16L2	0.590861	48.1886	44.6337	0.0918515	28.4728	no
ATG2A	0.420323	7.84903	18.4261	0.00773911	3.29912	no
ATG2B	0.670874	17.1334	20.2393	0.0129232	11.4944	no
ATG3	0.162154	1.78339	27.2758	0.0025196	0.289184	no
ATG4A	0.172349	2.27413	7.81377	0.00433049	0.391944	no
ATG4B	0.292592	3.32627	24.649	0.0029999	0.97324	no
ATG4C	0.360474	4.57741	7.26743	0.00845367	1.65004	no
ATG4D	0.391151	6.4294	19.6687	0.00855032	2.51487	no
ATG5	0.231878	2.25563	8.12832	0.00343595	0.523033	no
ATG7	0.428735	4.11763	10.964	0.00237785	1.76538	no
ATG9A	0.351503	5.53461	56.5483	0.00233091	1.94543	no
ATG9B	0.73804	25.1847	38.7578	0.156463	18.5873	no
ATHL1	0.849445	44.5072	11.5171	0.229087	37.8064	no
ATIC	0.337907	5.69166	39.5613	0.00260792	1.92325	no
ATL1	0.617625	6.82441	6.53135	0.00858965	4.21492	no
ATL2	0.27719	4.58751	82.9388	0.00395678	1.27161	no
ATL3	0.491089	5.43587	39.5923	0.00261424	2.6695	no
ATM	1.06791	46.0346	11.4095	0.0191376	49.1608	no
ATMIN	0.168555	2.0448	21.4989	0.00171949	0.34466	no
ATN1	0.535181	25.2301	47.342	0.01491	13.5027	no
ATOH7	0.683774	32.1331	0.23618	0.0530129	21.9718	no
ATOH8	1.09895	41.3743	3.59573	0.0987513	45.4682	no
ATOX1	0.224745	2.37008	79.9178	0.00622738	0.532665	no
ATP10A	0.580132	16.6021	2.25965	0.0654522	9.63141	no
ATP10B	0.41203	10.6715	13.0552	0.026256	4.39696	no
ATP10D	0.352886	4.77703	24.462	0.00652031	1.68575	no
ATP11A	0.350417	8.11356	6.56756	0.0150104	2.84313	no
ATP11B	0.325214	3.95666	42.9549	0.00283827	1.28676	no
ATP11C	0.500925	9.21966	9.2961	0.0172812	4.61836	no
ATP12A	1.09291	238.738	50.7922	0.489111	260.921	no
ATP13A1	0.490871	10.7134	39.4177	0.00791006	5.25889	no
ATP13A2	0.424897	11.3827	24.2983	0.0042758	4.83647	no
ATP13A3	0.406477	4.98727	18.8909	0.0139913	2.02721	no
ATP13A4	0.935153	14.3756	12.6409	0.0224913	13.4434	no
ATP13A5	1.78935	200.273	1.6653	0.443984	358.359	no
ATP1A1	0.365843	5.81535	286.81	0.00962783	2.1275	no
ATP1A1OS	1.01773	27.8503	1.93749	0.0645113	28.3441	no
ATP1A2	1.23363	78.0231	0.813162	0.310346	96.2517	no
ATP1A3	1.50463	137.785	0.698883	0.843922	207.315	no
ATP1B1	0.512884	6.25548	53.8083	0.0654209	3.20834	no
ATP1B2	0.668996	14.9406	1.13996	0.0865637	9.99524	no
ATP1B3	0.356594	4.1275	218.861	0.00956306	1.47184	no
ATP1B3-AS1	0.721088	94.6391	13.64	0.134903	68.2432	no
ATP2A1	0.502803	30.0787	1.25023	0.112062	15.1237	no
ATP2A2	0.35028	5.02616	142.38	0.00481845	1.76056	no
ATP2A3	0.77816	28.8068	13.9114	0.193906	22.4163	no
ATP2B1	0.491192	5.646	25.0887	0.00302485	2.77327	no
ATP2B2	1.47279	273.377	0.287039	1.48404	402.628	no
ATP2B4	0.462446	9.82882	37.5657	0.0173855	4.5453	no
ATP2C1	0.219631	2.9682	49.8678	0.00295361	0.651908	no
ATP2C2	0.383525	7.57149	13.9867	0.0278473	2.90386	no
ATP5A1	0.349694	4.32595	357.238	0.0102781	1.51276	no
ATP5B	0.338573	4.5244	703.553	0.00615159	1.53184	no
ATP5C1	0.243673	2.22673	206.611	0.0056313	0.542595	no
ATP5D	0.45593	21.0331	74.3253	0.0100771	9.58962	no
ATP5E	0.36051	3.72169	92.646	0.0145166	1.3417	no
ATP5F1	0.243131	2.58566	84.7327	0.00718388	0.628655	no
ATP5F1P5	0.576807	16.7333	1.27568	0.0671152	9.6519	no
ATP5G1	0.328929	4.13788	94.8653	0.00745493	1.36107	no
ATP5G1P6	0.665489	105.745	6.06796	0.181021	70.3725	no
ATP5G2	0.299881	3.24253	157.719	0.00691402	0.972371	no
ATP5G3	0.50263	7.22085	118.286	0.0182155	3.62941	no
ATP5H	0.221344	2.50904	91.0382	0.00764785	0.555361	no
ATP5I	0.373146	4.83323	43.3565	0.0333637	1.8035	no
ATP5J	0.338427	3.92235	52.9039	0.010007	1.32743	no
ATP5J2	0.332277	3.61044	57.5489	0.0130321	1.19966	no
ATP5L	0.35122	3.41136	49.1544	0.0158875	1.19814	no
ATP5O	0.274802	3.16006	32.9216	0.0139286	0.868391	no
ATP5S	0.302634	3.33951	26.7518	0.00640897	1.01065	no
ATP5SL	0.226519	2.61156	19.782	0.00240455	0.591568	no
ATP6AP1	0.302783	3.4215	67.8518	0.0023382	1.03597	no
ATP6AP1L	0.686654	23.7876	1.42855	0.105608	16.3338	no
ATP6AP2	0.17207	2.03418	105.702	0.00174282	0.35002	no
ATP6V0A1	0.247556	3.77485	19.9256	0.00509608	0.934486	no
ATP6V0A2	0.38233	7.27033	12.4649	0.00575305	2.77967	no
ATP6V0A4	1.18491	208.344	3.83526	1.731	246.868	no
ATP6V0B	0.436461	8.00743	93.4583	0.0121642	3.49493	no
ATP6V0D1	0.256101	3.08055	46.0237	0.00258041	0.788932	no
ATP6V0E1	0.307789	3.37832	100.914	0.00923049	1.03981	no
ATP6V0E2	0.716334	14.918	8.53046	0.139107	10.6863	no
ATP6V0E2-AS1	0.751632	25.1964	0.468089	0.156018	18.9384	no
ATP6V1A	0.243462	3.67119	121.857	0.00268391	0.893798	no
ATP6V1B1	1.12368	100.031	4.40677	0.238714	112.402	no
ATP6V1B2	0.210878	2.27566	38.3692	0.00198319	0.479885	no
ATP6V1C1	0.253145	4.04234	50.272	0.00391796	1.0233	no
ATP6V1C2	0.446723	5.79307	49.9447	0.0439223	2.58789	no
ATP6V1D	0.207762	2.35496	44.6212	0.00653537	0.489272	no
ATP6V1E1	0.169616	1.89472	118.367	0.00273199	0.321374	no
ATP6V1E2	0.338628	4.0635	8.65439	0.0185803	1.37601	no
ATP6V1F	0.351113	5.79882	101.994	0.00804083	2.03604	no
ATP6V1G1	0.324312	3.87815	160.292	0.0100444	1.25773	no
ATP6V1G2	0.570924	16.4924	0.690399	0.0359228	9.41593	no
ATP6V1H	0.137362	1.9375	31.3378	0.00170921	0.266139	no
ATP7A	0.643742	11.7841	16.5361	0.0119981	7.58595	no
ATP7B	0.498304	19.2085	1.59347	0.0633941	9.57166	no
ATP8A1	1.02803	47.5601	2.13522	0.143227	48.8932	no
ATP8A2	0.739619	15.5264	0.596619	0.120317	11.4836	no
ATP8B1	0.297033	5.46805	16.3375	0.00559961	1.62419	no
ATP8B2	0.694267	18.7779	8.95652	0.0752996	13.0368	no
ATP8B3	0.650485	12.5504	0.616798	0.0724341	8.16384	no
ATP8B4	1.07518	20.5102	2.0453	0.0396215	22.0522	no
ATP9A	0.474543	8.80643	13.594	0.0290476	4.17903	no
ATP9B	0.640735	10.4686	5.1694	0.00495524	6.70762	no
ATPAF1	0.297598	4.27381	26.1908	0.00756348	1.27188	no
ATPAF2	0.169399	1.99806	13.8832	0.00361138	0.33847	no
ATPBD4	0.957665	8.82083	5.35223	0.0056025	8.44739	no
ATPIF1	0.255896	3.33316	53.2054	0.00326909	0.852944	no
ATR	0.59275	16.1832	12.9073	0.00765966	9.59261	no
ATRAID	0.294035	3.12567	77.6436	0.00908808	0.919056	no
ATRIP	0.254956	2.87565	7.41288	0.00585963	0.733166	no
ATRN	0.310149	5.29171	20.6834	0.0106607	1.64122	no
ATRNL1	1.01979	17.2646	0.620133	0.269498	17.6063	no
ATRX	0.697591	17.3323	18.6202	0.0138781	12.0908	no
ATXN1	0.362139	4.36356	12.294	0.00975313	1.58022	no
ATXN10	0.212094	2.26604	42.312	0.00264512	0.480613	no
ATXN1L	0.273811	6.12326	18.4364	0.00610357	1.67661	no
ATXN2	0.348866	8.29122	13.024	0.00713201	2.89252	no
ATXN2L	0.482316	8.67289	24.8289	0.00759886	4.18307	no
ATXN3	0.708157	12.3531	45.038	0.00717629	8.74795	no
ATXN7	0.333103	7.5172	6.37627	0.0045232	2.504	no
ATXN7L1	0.28792	5.95247	3.69477	0.0084809	1.71384	no
ATXN7L2	0.487428	7.22024	3.23126	0.0227007	3.51935	no
ATXN7L3	0.298706	3.14716	143.757	0.00289946	0.940077	no
ATXN7L3B	0.232348	3.71759	41.1829	0.00389448	0.863776	no
AUH	0.572696	7.25672	9.88194	0.00901396	4.1559	no
AUNIP	0.495481	14.6926	3.05285	0.0309969	7.27988	no
AUP1	0.275227	3.53637	87.2869	0.00348775	0.973304	no
AURKA	0.667448	14.3313	7.10855	0.0596798	9.56539	no
AURKAIP1	0.356096	6.58921	71.2671	0.00728236	2.34639	no
AURKB	0.561675	11.4878	15.6207	0.0325771	6.45243	no
AURKC	0.472949	5.22837	2.06446	0.023095	2.47275	no
AUTS2	0.383154	11.7573	20.3275	0.0152045	4.50485	no
AVEN	0.264663	3.12534	27.4838	0.00819338	0.827161	no
AVIL	0.513442	12.3459	5.743	0.0276596	6.33891	no
AVL9	0.357294	6.63816	8.35402	0.0028753	2.37178	no
AVPI1	0.457891	6.62646	47.6704	0.0186634	3.0342	no
AVPR1A	0.872682	22.0406	2.74623	0.136007	19.2344	no
AVPR2	0.614108	20.9986	0.533026	0.12288	12.8954	no
AXIN1	0.35609	5.14458	20.6768	0.00650441	1.83194	no
AXIN2	0.34951	6.97255	8.53218	0.0165706	2.43698	no
AXL	0.551733	9.86156	10.7045	0.0299975	5.44095	no
AZGP1	0.390003	7.69958	181.965	0.0216155	3.00286	no
AZGP1P1	0.615631	9.56147	39.6231	0.0927247	5.88634	no
AZI1	0.491391	10.8638	6.57813	0.024543	5.33836	no
AZI2	0.237944	2.68683	14.3079	0.00358621	0.639316	no
AZIN1	0.300051	4.47801	123.899	0.00569338	1.34363	no
B2M	0.612797	8.2232	1120.41	0.0596571	5.03915	no
B3GALNT1	0.436986	5.49028	5.66251	0.0169491	2.39918	no
B3GALNT2	0.347578	5.74454	14.3616	0.00621674	1.99668	no
B3GALT2	1.76508	181.328	1.1012	0.113062	320.058	no
B3GALT4	0.309145	5.30112	11.0746	0.0179573	1.63881	no
B3GALT6	0.399268	5.55427	11.957	0.00654474	2.21765	no
B3GALTL	0.296324	4.46334	6.48552	0.00926683	1.3226	no
B3GAT1	0.612933	16.7257	0.617045	0.109941	10.2517	no
B3GAT2	0.406422	26.7282	0.468331	0.0271472	10.8629	no
B3GAT3	0.345529	4.45229	28.1503	0.00575048	1.53839	no
B3GNT1	0.336461	3.82278	9.30251	0.0104268	1.28622	no
B3GNT2	0.208844	2.14063	22.8984	0.00427746	0.447059	no
B3GNT3	0.872801	36.6745	12.8716	0.232244	32.0095	no
B3GNT4	0.401099	5.22262	1.43334	0.0280858	2.09478	no
B3GNT5	0.508776	7.61176	33.3835	0.0266989	3.87269	no
B3GNT7	0.49227	6.85764	7.71193	0.0623882	3.37581	no
B3GNT8	0.576907	16.7589	4.63774	0.0573328	9.66834	no
B3GNT9	0.37674	5.50857	7.36322	0.00699295	2.0753	no
B3GNTL1	0.34575	5.29662	9.82305	0.0119204	1.83131	no
B4GALNT1	0.803827	16.6002	0.419923	0.158597	13.3437	no
B4GALNT2	0.985206	158.563	1.12355	1.62155	156.217	no
B4GALNT3	0.533536	10.1401	15.5895	0.0221502	5.41013	no
B4GALNT4	0.976266	55.3742	2.46007	0.221699	54.06	no
B4GALT1	0.420869	6.48747	54.7254	0.00581549	2.73038	no
B4GALT2	0.339319	6.24425	64.8966	0.00332782	2.11879	no
B4GALT3	0.233876	2.17217	20.9985	0.00319154	0.508018	no
B4GALT4	0.372548	4.31441	10.3638	0.00479973	1.60732	no
B4GALT5	0.380444	4.93177	15.8231	0.012748	1.87626	no
B4GALT6	0.350887	4.72334	4.03833	0.0237729	1.65735	no
B4GALT7	0.296399	4.00606	9.71747	0.00348503	1.18739	no
B9D1	0.356216	3.9911	8.77652	0.011826	1.42169	no
B9D2	0.299505	4.04151	4.90769	0.0113138	1.21045	no
BAALC	0.617117	9.4617	9.7852	0.0772904	5.83897	no
BAAT	0.723406	15.4786	0.060369	0.12339	11.1973	no
BABAM1	0.24061	2.45851	12.9621	0.00501749	0.591541	no
BACE1	0.310541	5.09012	53.8974	0.00899872	1.58069	no
BACE2	0.243419	2.93523	16.9041	0.0056455	0.714492	no
BACH1	0.518658	5.99925	131.609	0.00321401	3.11156	no
BACH1-IT1	1.30091	24.322	3.15323	0.0348014	31.6408	no
BACH2	1.36422	49.5803	1.98205	0.209989	67.6386	no
BAD	0.307716	3.89461	13.4399	0.0126059	1.19844	no
BAG1	0.183826	2.34437	114.133	0.00325901	0.430956	no
BAG2	0.714348	9.32111	4.51599	0.0297545	6.65852	no
BAG3	0.37493	8.2753	145.473	0.00237434	3.10266	no
BAG4	0.458563	5.54024	10.5359	0.00725972	2.54055	no
BAG5	0.220232	3.21891	190.376	0.00266863	0.708907	no
BAG6	0.397199	8.27864	84.976	0.00237022	3.28826	no
BAHCC1	0.508119	16.9719	2.78776	0.0413423	8.62374	no
BAHD1	0.475808	7.17931	8.67487	0.0126354	3.41597	no
BAI1	1.57505	69.7608	3.14886	0.470737	109.877	no
BAI2	0.598863	17.4787	1.26743	0.0549223	10.4673	no
BAIAP2	0.289746	3.34052	21.0391	0.00396096	0.967903	no
BAIAP2-AS1	0.512114	7.69272	3.11711	0.0254261	3.93955	no
BAIAP2L1	0.332004	4.71881	15.6314	0.00853262	1.56666	no
BAIAP2L2	0.566969	18.3166	5.61275	0.0347209	10.385	no
BAIAP3	0.651718	12.7587	1.2343	0.112122	8.31506	no
BAK1	0.397276	9.64317	62.548	0.00589186	3.831	no
BAK1P1	0.527888	15.7641	5.301	0.15766	8.32169	no
BAMBI	0.729797	19.7587	2.67137	0.173024	14.4198	no
BANF1	0.43723	11.5297	146.049	0.00866729	5.04113	no
BANK1	0.811562	24.236	1.82736	0.237918	19.669	no
BANP	0.254271	3.7483	5.13213	0.00967871	0.953083	no
BAP1	0.504516	7.5163	60.5704	0.00904026	3.7921	no
BARD1	0.560818	12.9726	10.3862	0.0255857	7.27527	no
BARX2	0.680807	15.8277	30.7596	0.0411004	10.7756	no
BASP1	0.562863	9.78052	33.1881	0.0369762	5.50509	no
BATF	0.987112	62.1609	16.5546	0.367203	61.3598	no
BATF2	1.13178	115.212	5.67974	0.340797	130.395	no
BATF3	0.6172	10.4341	3.23068	0.112289	6.43993	no
BAX	0.379969	8.35502	24.5066	0.00313466	3.17465	no
BAZ1A	0.274501	6.74175	37.1678	0.0048427	1.85062	no
BAZ1B	0.32947	8.0255	26.5805	0.0138317	2.64416	no
BAZ2A	0.305373	6.93337	31.5157	0.00780366	2.11726	no
BAZ2B	1.07374	40.1188	8.55254	0.0130835	43.0769	no
BBC3	0.548709	7.68146	4.02688	0.0449966	4.21489	no
BBIP1	1.0569	11.8981	17.9218	0.00561292	12.5751	no
BBOX1	0.491838	11.1003	23.6407	0.0298383	5.45953	no
BBS1	0.723353	132.206	0.471259	0.0702548	95.6314	no
BBS10	0.402459	5.60353	9.54325	0.0108103	2.25519	no
BBS12	0.491941	6.45573	8.30931	0.0109498	3.17584	no
BBS2	0.727114	13.0678	30.2321	0.0135826	9.50177	no
BBS4	0.336441	6.19588	9.69637	0.0118227	2.08455	no
BBS5	0.366602	14.0764	3.55542	0.0352421	5.16045	no
BBS7	0.409465	4.69535	7.89508	0.00572859	1.92258	no
BBS9	0.795555	10.4574	5.59148	0.0146704	8.31944	no
BBX	0.57284	16.0848	27.2215	0.0146517	9.214	no
BCAM	1.18323	61.9209	39.6168	0.103371	73.2668	no
BCAN	0.733488	48.5443	2.32452	0.245761	35.6067	no
BCAP29	0.396363	4.60698	18.1113	0.0136202	1.82604	no
BCAP31	0.376359	5.75217	237.989	0.00714941	2.16488	no
BCAR1	0.444891	10.8517	18.3016	0.00962181	4.8278	no
BCAR3	1.03692	23.6363	6.98401	0.0802991	24.5091	no
BCAS1	0.835745	27.4887	0.718801	0.142047	22.9735	no
BCAS2	0.221375	2.26442	41.3036	0.0047538	0.501285	no
BCAS3	0.511851	6.92851	4.08707	0.0090063	3.54636	no
BCAS4	0.463596	7.28368	1.89922	0.0258435	3.37668	no
BCAT1	1.00522	74.2093	6.01594	0.0799798	74.5968	no
BCAT2	1.0873	17.751	21.1712	0.181629	19.3006	no
BCCIP	0.20679	2.59465	24.1879	0.00475844	0.536549	no
BCDIN3D	0.221974	2.4625	4.23793	0.00752688	0.54661	no
BCDIN3D-AS1	0.627804	7.72753	3.19421	0.016457	4.85138	no
BCHE	0.675991	15.0873	16.6767	0.0967374	10.1989	no
BCKDHB	0.606153	10.0668	8.61411	0.07732	6.10201	no
BCKDK	0.354776	6.76983	33.0817	0.00502243	2.40178	no
BCL10	0.153742	2.18585	18.0783	0.00343181	0.336057	no
BCL11A	0.482357	10.6233	10.7907	0.0556105	5.1242	no
BCL11B	0.423973	8.1155	8.06135	0.017437	3.44075	no
BCL2	0.767468	22.2564	14.5827	0.0957383	17.081	no
BCL2A1	0.865892	24.1003	7.41923	0.328599	20.8682	no
BCL2L1	0.345745	6.23989	357.344	0.00432104	2.15741	no
BCL2L10	0.615879	8.74332	15.3602	0.0774639	5.38483	no
BCL2L11	0.402594	5.74741	43.224	0.00697357	2.31387	no
BCL2L12	0.444329	17.2674	17.7922	0.00938678	7.67242	no
BCL2L13	0.208359	2.34757	14.4729	0.00280558	0.489138	no
BCL2L14	0.889662	25.4559	1.02738	0.22546	22.6471	no
BCL2L15	0.517773	15.4498	2.29088	0.0842168	7.99947	no
BCL2L2	0.258116	3.83344	243.778	0.00607029	0.989473	no
BCL2L2-PABPN1	0.613251	54.1416	0.836559	0.145788	33.2024	no
BCL3	0.552715	33.1014	37.031	0.0214588	18.2957	no
BCL6	0.290127	5.89321	66.9226	0.00863448	1.70978	no
BCL6B	0.474825	4.78008	3.82194	0.0323318	2.2697	no
BCL7A	0.510502	6.55225	12.9405	0.0216798	3.34493	no
BCL7B	0.379751	6.92113	51.6266	0.0043723	2.6283	no
BCL7C	0.186357	2.44753	13.6941	0.00700069	0.456116	no
BCL9	0.47077	8.94983	7.86895	0.0169462	4.21332	no
BCL9L	0.501029	15.9503	27.1404	0.0129158	7.99157	no
BCLAF1	0.346677	8.21201	102.034	0.00458758	2.84692	no
BCMO1	1.17345	56.6917	0.468094	0.455669	66.5247	no
BCO2	0.542493	33.2987	2.37721	0.0818712	18.0643	no
BCOR	0.385475	7.90382	8.67453	0.0123731	3.04673	no
BCORL1	0.446522	6.39453	2.14758	0.0315127	2.8553	no
BCR	0.349309	5.29719	26.1505	0.00340336	1.85036	no
BCS1L	0.412868	4.34652	25.0494	0.0203829	1.79454	no
BCYRN1	1.65266	67.3349	0.187038	0.054675	111.282	no
BDH1	0.239296	2.29259	27.055	0.00457139	0.548608	no
BDH2	0.586984	9.22532	23.2345	0.018738	5.41512	no
BDKRB1	0.51371	6.32659	2.15839	0.0433976	3.25003	no
BDKRB2	0.456703	5.33583	35.1108	0.0207477	2.43689	no
BDNF	0.759788	19.4023	1.02129	0.0541961	14.7416	no
BDNF-AS	0.753245	17.1224	1.72344	0.0797518	12.8974	no
BDP1	0.963662	32.0698	7.8581	0.0152113	30.9044	no
BEAN1	1.06179	36.3693	1.87058	0.240377	38.6165	no
BECN1	0.154089	1.85415	39.85	0.00182885	0.285704	no
BEGAIN	0.74686	14.7754	5.9293	0.19536	11.0352	no
BEND3	0.445812	5.88713	2.17442	0.0136648	2.62455	no
BEND3P3	0.609371	35.3994	4.09109	0.0596763	21.5713	no
BEND5	0.942637	47.1637	1.65565	0.172737	44.4583	no
BEND6	0.497696	7.36938	1.37433	0.0448213	3.66771	no
BEND7	0.717153	27.1675	4.34356	0.202229	19.4833	no
BEST1	0.612403	10.2156	3.05946	0.0310859	6.25605	no
BEST2	0.690371	26.4743	0.312353	0.170545	18.2771	no
BEST4	0.616657	39.5659	0.808044	0.196086	24.3986	no
BET1	0.279085	3.1426	5.52268	0.0106674	0.877051	no
BET1L	0.322662	5.50891	38.5719	0.00252217	1.77752	no
BEX2	0.632448	11.2335	17.0875	0.0963159	7.10463	no
BEX4	0.577505	10.3209	11.8178	0.0804402	5.96036	no
BEX5	0.63822	12.9672	2.26209	0.159466	8.27592	no
BFAR	0.178415	1.9398	16.263	0.0032849	0.346089	no
BFSP1	0.353767	4.46597	1.77464	0.0189395	1.57991	no
BGLAP	0.642754	14.2495	0.457176	0.0400012	9.15891	no
BGN	0.828738	62.851	90.8905	0.139913	52.087	no
BHLHB9	0.551925	14.3582	2.58658	0.0447024	7.92463	no
BHLHE22	0.838973	19.7485	0.873082	0.281871	16.5685	no
BHLHE40	0.455095	7.6822	109.704	0.0133904	3.49613	no
BHLHE40-AS1	0.394896	5.52452	0.703951	0.0186978	2.18161	no
BHLHE41	0.794448	22.5468	5.64967	0.120258	17.9122	no
BHMT2	1.27887	68.2761	1.53109	0.14443	87.3162	no
BICC1	0.722546	16.8769	8.98573	0.0790151	12.1943	no
BICD1	0.420174	9.75381	5.68039	0.0325859	4.09829	no
BICD2	0.305902	3.33564	131.228	0.00757677	1.02038	no
BID	0.344349	3.47049	39.6055	0.0140679	1.19506	no
BIK	0.534428	6.51819	5.55377	0.058516	3.4835	no
BIN1	1.11611	18.9983	13.1664	0.0570117	21.2043	no
BIN2	0.810989	13.9411	8.79713	0.144208	11.3061	no
BIN3	0.222595	3.5486	15.443	0.00591286	0.789898	no
BIRC2	0.303703	3.63129	44.6157	0.00309082	1.10283	no
BIRC3	0.82458	23.296	20.0235	0.220751	19.2094	no
BIRC5	0.5265	8.75214	10.8929	0.0465102	4.608	no
BIRC6	1.00854	24.1431	23.1339	0.00525425	24.3492	no
BIRC7	0.713392	56.3058	0.749511	0.119213	40.1681	no
BIVM	0.394357	5.06567	5.85119	0.013491	1.99768	no
BLCAP	0.207345	2.45853	169.904	0.00268528	0.509763	no
BLM	0.456182	10.6301	3.29475	0.0341978	4.84927	no
BLMH	0.451928	6.46463	142.238	0.0358063	2.92155	no
BLNK	0.36493	4.68358	18.6115	0.0112791	1.70918	no
BLOC1S1	0.395367	3.62623	11.4099	0.0154642	1.43369	no
BLOC1S2	0.252809	3.64117	77.8804	0.00530069	0.92052	no
BLOC1S3	0.436491	12.4905	88.9788	0.00576055	5.45198	no
BLOC1S4	0.316513	5.4498	12.3702	0.00690172	1.72493	no
BLOC1S5	0.370734	4.03099	16.8169	0.0110635	1.49442	no
BLOC1S6	0.216717	3.01883	28.6797	0.00300161	0.654231	no
BLVRA	0.236088	2.67301	24.6239	0.00919832	0.631065	no
BLVRB	0.288467	2.83122	47.3571	0.00872029	0.816714	no
BLZF1	0.190455	2.09908	38.4318	0.00295634	0.39978	no
BMF	0.646202	14.3937	5.28013	0.0424821	9.30123	no
BMI1	0.576227	8.629	23.3612	0.0226352	4.97227	no
BMP1	0.466183	7.90861	17.9243	0.0136157	3.68686	no
BMP2	0.598441	11.0997	7.00263	0.0857737	6.64254	no
BMP2K	0.421269	3.99558	6.36997	0.0072907	1.68321	no
BMP4	0.417637	7.25385	6.18125	0.0437828	3.02948	no
BMP6	0.60152	8.42568	2.72321	0.105783	5.06822	no
BMP7	0.627663	9.02637	125.969	0.0291259	5.66551	no
BMP8A	0.609899	53.5946	0.691415	0.085126	32.6873	no
BMP8B	0.880303	50.926	1.82041	0.191621	44.8303	no
BMPER	1.47312	163.157	0.188434	0.583186	240.349	no
BMPR1A	0.564845	7.43613	21.9872	0.0169601	4.20026	no
BMPR1B	0.73418	17.6626	0.830828	0.15973	12.9675	no
BMPR2	0.441416	5.32818	11.9649	0.00922712	2.35195	no
BMS1	0.253781	4.47515	33.8558	0.00571833	1.13571	no
BMS1P4	0.704964	74.9337	1.68261	0.0463487	52.8255	no
BMS1P5	0.467723	29.7658	1.62878	0.0669984	13.9221	no
BMX	0.987498	24.2135	1.04653	0.116257	23.9108	no
BNC1	0.496059	7.2024	61.2592	0.0276564	3.57281	no
BNC2	3.41669	222.922	16.1896	0.892199	761.655	no
BNIP1	0.227468	2.40598	4.20651	0.00880534	0.547284	no
BNIP2	0.38628	5.13564	124.229	0.00317774	1.98379	no
BNIP3	0.452613	6.12796	44.5993	0.0206709	2.77359	no
BNIP3L	0.277791	3.22699	326.729	0.00749246	0.896429	no
BNIP3P1	0.504948	23.7141	9.27446	0.0456742	11.9744	no
BNIPL	0.323642	4.04022	119.383	0.0126515	1.30759	no
BOC	0.43284	9.44085	20.419	0.034323	4.08638	no
BOD1	0.292225	3.39264	37.7528	0.00811442	0.991416	no
BOD1L1	0.71738	24.3025	14.9928	0.0170965	17.4341	no
BOK	0.523516	13.2872	36.4541	0.0112783	6.95604	no
BOLA1	0.428842	4.1001	10.9842	0.0272975	1.75829	no
BOLA2B	0.40141	3.89748	1.56361	0.0151792	1.56449	no
BOLA3	0.407708	7.25935	9.26355	0.0258376	2.95969	no
BOLA3-AS1	0.706557	35.0339	1.57031	0.086282	24.7535	no
BOP1	0.550127	12.5505	6.1155	0.0224065	6.90438	no
BORA	0.40382	5.4047	5.78854	0.0189673	2.18253	no
BPGM	0.403551	5.10894	21.1818	0.0156247	2.06171	no
BPHL	0.319356	3.36934	7.52885	0.0125123	1.07602	no
BPIFC	0.350374	5.29465	54.075	0.0102941	1.85511	no
BPNT1	0.237919	2.74567	34.1284	0.00344007	0.653247	no
BPTF	0.614375	19.1777	23.4937	0.0117561	11.7823	no
BRAF	0.871491	9.61473	15.3803	0.00851754	8.37915	no
BRAP	0.212413	2.9314	26.9085	0.00225269	0.622669	no
BRAT1	0.424402	6.66866	17.2045	0.00533764	2.83019	no
BRCA1	0.426881	15.2379	10.4655	0.0301585	6.50476	no
BRCA2	0.828658	25.7457	2.54044	0.0516037	21.3344	no
BRCC3	0.176594	2.79024	9.97849	0.00268176	0.49274	no
BRD1	0.270443	7.35944	39.9589	0.00854991	1.99031	no
BRD2	0.356653	6.60553	84.8305	0.00517347	2.35588	no
BRD3	0.375623	5.92304	9.92958	0.010728	2.22483	no
BRD4	0.473759	9.90713	32.1901	0.00994514	4.69359	no
BRD7	0.244102	3.99751	53.3636	0.00390543	0.975803	no
BRD8	0.402594	13.0107	18.2911	0.0172865	5.23803	no
BRD9	0.323407	6.55509	20.9153	0.00685142	2.11996	no
BRE	0.24447	3.30368	17.1127	0.00620774	0.80765	no
BRF1	0.358036	8.65429	19.5964	0.0144041	3.09855	no
BRF2	0.233686	2.44118	9.52562	0.0086629	0.57047	no
BRI3	0.347892	3.6741	43.9278	0.0146531	1.27819	no
BRI3BP	1.14039	24.3284	22.311	0.156786	27.7439	no
BRICD5	0.573718	31.0322	3.52694	0.109981	17.8037	no
BRIP1	0.574858	22.8859	4.76474	0.0552989	13.1562	no
BRIX1	0.232536	2.63905	30.7571	0.00493513	0.613674	no
BRK1	0.278756	3.39033	243.146	0.00648506	0.945075	no
BRMS1	0.270868	3.53677	52.4639	0.00248697	0.957996	no
BRMS1L	0.309435	4.42274	13.2675	0.0105804	1.36855	no
BROX	0.291522	3.26955	39.4343	0.00371104	0.953144	no
BRPF1	0.290642	6.93503	14.847	0.00637259	2.01561	no
BRPF3	0.390794	6.95285	8.91011	0.00948236	2.71714	no
BRSK1	0.966443	17.3342	0.572663	0.271866	16.7525	no
BRSK2	1.08632	50.4359	0.289602	0.453585	54.7896	no
BRWD1	1.0414	22.7301	30.4832	0.00700233	23.6711	no
BRWD1-IT2	0.521279	7.14366	2.1333	0.0377064	3.72384	no
BRWD3	0.582993	16.0383	9.43352	0.0126008	9.35021	no
BSCL2	0.295054	3.12997	1.06795	0.00844378	0.92351	no
BSDC1	0.179971	2.76446	41.6399	0.00245073	0.497524	no
BSG	0.46459	14.9585	75.603	0.0106945	6.94958	no
BSN	0.824504	46.4522	0.156194	0.156041	38.3	no
BSPRY	0.298749	2.91545	17.548	0.0103274	0.870985	no
BST1	0.729594	7.58976	2.19415	0.0542234	5.53744	no
BST2	1.31986	60.8451	53.8793	0.598591	80.3067	no
BTAF1	0.705862	29.1634	37.9037	0.0176403	20.5853	no
BTBD1	0.178614	2.27195	47.016	0.00248875	0.405802	no
BTBD10	0.204325	2.40068	31.8075	0.00236265	0.490519	no
BTBD11	0.305842	3.18237	12.1097	0.00596257	0.973303	no
BTBD16	0.964975	29.0066	3.70269	0.0956309	27.9907	no
BTBD19	0.450224	18.375	7.35463	0.0444125	8.27288	no
BTBD2	0.3535	5.51578	43.8042	0.00333353	1.94983	no
BTBD3	0.299468	4.72461	19.3425	0.00385442	1.41487	no
BTBD6	0.30435	3.82381	33.4256	0.00364666	1.16378	no
BTBD7	0.288633	4.16947	12.2917	0.00513023	1.20345	no
BTBD7P1	0.726414	37.5228	0.312142	0.151739	27.2571	no
BTBD8	1.69193	154.146	1.10692	0.0397514	260.805	no
BTBD9	0.258437	3.56893	33.3486	0.00443938	0.922343	no
BTC	1.51923	72.4937	8.37829	0.161716	110.135	no
BTD	0.411507	4.3265	5.48644	0.0149832	1.78039	no
BTF3	0.244887	2.5043	746.177	0.00613898	0.613272	no
BTF3L4	0.198324	2.28109	193.469	0.0026605	0.452396	no
BTF3L4P2	0.923119	13.4539	0.835049	0.0133134	12.4195	no
BTG1	0.299871	3.58884	790.492	0.00769898	1.07619	no
BTG2	0.326282	4.08861	49.3401	0.00596714	1.33404	no
BTG3	0.252582	2.79188	49.9552	0.00667408	0.705179	no
BTK	0.457013	8.22309	6.41965	0.0442565	3.75806	no
BTLA	0.823977	59.1983	1.20392	0.308278	48.778	no
BTN2A1	0.299698	9.79128	18.1907	0.00980178	2.93443	no
BTN2A2	0.446429	11.2014	5.28453	0.0302534	5.00064	no
BTN2A3P	0.424837	19.289	4.45594	0.0337494	8.1947	no
BTN3A1	0.651883	16.3926	13.1103	0.0992156	10.686	no
BTN3A2	0.666861	27.9639	12.59	0.167503	18.648	no
BTN3A3	0.548399	11.1796	10.7181	0.0708042	6.13089	no
BTNL9	0.808684	213.635	3.37878	0.528163	172.764	no
BTRC	0.233452	3.41945	6.8805	0.00386975	0.798279	no
BUB1	0.499301	7.33459	7.14044	0.0385783	3.66217	no
BUB1B	0.549309	12.5721	9.76282	0.0448519	6.90595	no
BUB3	0.211119	2.56175	95.0131	0.00288692	0.540833	no
BUD13	0.28996	4.63444	17.1122	0.00592105	1.3438	no
BUD31	0.255434	2.91965	24.0002	0.00661282	0.745779	no
BVES	0.444075	4.57897	3.61169	0.0316526	2.03341	no
BX322557.10	0.526603	24.7549	2.72547	0.0477696	13.036	no
BX470102.3	1.0491	17.5345	2.17364	0.0272787	18.3955	no
BX936347.1	0.476073	6.72796	4.52041	0.0404673	3.203	no
BYSL	0.312225	4.7283	19.1228	0.00284071	1.47629	no
BZRAP1	0.498876	95.3615	3.56636	0.107323	47.5736	no
BZRAP1-AS1	0.780536	29.239	0.310937	0.111932	22.8221	no
BZW1	0.290607	3.20633	275.682	0.00709997	0.931783	no
BZW1P2	0.333052	4.3398	4.70051	0.0222149	1.44538	no
BZW2	0.264379	2.61136	57.8711	0.00502254	0.690387	no
C10orf10	0.646718	16.042	47.412	0.129609	10.3746	no
C10orf107	1.09568	33.9086	0.316109	0.0366171	37.1529	no
C10orf11	1.191	24.6326	5.08846	0.0578662	29.3375	no
C10orf111	0.565213	8.77825	0.180508	0.0366298	4.96158	no
C10orf114	0.511474	7.71454	1.03596	0.0461343	3.94578	no
C10orf118	0.551601	9.79832	14.7679	0.00723292	5.40477	no
C10orf12	0.914802	15.9654	2.65935	0.0571421	14.6052	no
[truncated: 16,576 more rows]
