# Supplementary material for: RNA-seq reveals more consistent reference genes for gene expression studies in human non-melanoma skin cancers
Source: PeerJ. 2017 Aug 21;5:e3631. doi: 10.7717/peerj.3631 (PMC5572537; doi:10.7717/peerj.3631)
Supplement: Table S7 — Genes were selected based on the product (MFC-CoV) of Coefficient of variation and ratio of the maximum to minimum (MFC). Genes with MFC-CoV falls below the first quartile (MFC-CoV ≤ 1.63084) was used. A total of 4,643 gene candidates were used. [file peerj-05-3631-s009.xlsx]

## Sheet: Sheet1
Supplementary Table 7 : Genes below the lower quartile of MFC-CoV Score
Gene	CoV	MFC	Mean TSM	bcv	status	score
AAAS	0.338869	4.0253	26.6758	0.00694308	all	1.36405
AAED1	0.303986	2.78928	8.23683	0.0114924	all	0.847901
AAGAB	0.184223	2.36057	61.9258	0.00323124	all	0.434873
AAMP	0.248993	3.26984	68.3041	0.00200629	all	0.814166
AAR2	0.233068	2.83111	28.3281	0.00212116	all	0.65984
AARS	0.347857	3.85341	40.6189	0.0076624	all	1.34043
AASDHPPT	0.211192	2.53897	9.01704	0.00363506	all	0.536209
AATF	0.209878	2.35402	21.1174	0.00296599	all	0.494056
ABCA12	0.337674	3.70975	66.3843	0.0121215	all	1.25269
ABCB10	0.294451	4.86274	16.4488	0.00632742	all	1.43184
ABCB7	0.352202	3.70948	22.4288	0.00389005	all	1.30649
ABCE1	0.233723	3.2	81.6805	0.00370592	all	0.747913
ABCF1	0.295446	3.98745	31.3922	0.00252079	all	1.17808
ABCF2	0.25803	2.8576	36.779	0.00193908	all	0.737346
ABCF3	0.266906	3.32049	24.7544	0.00307445	all	0.886259
ABCG1	0.242928	3.0069	12.0528	0.00757938	all	0.730461
ABHD12	0.317817	3.782	48.2341	0.00654585	all	1.20198
ABHD13	0.278898	2.83432	10.9548	0.00412268	all	0.790485
ABHD14A	0.326228	3.15065	4.37228	0.0174107	all	1.02783
ABHD14B	0.355802	4.36376	23.7032	0.0112994	all	1.55263
ABHD15	0.366017	3.86946	6.51065	0.0117264	all	1.41629
ABHD17B	0.299906	3.58661	23.274	0.00967936	all	1.07565
ABHD4	0.357492	4.04993	39.7261	0.00706766	all	1.44782
ABHD6	0.378318	3.34206	12.0102	0.0102052	all	1.26436
ABI1	0.146745	1.96201	61.1365	0.00163211	all	0.287915
ABL1	0.30136	4.48035	25.3616	0.00563609	all	1.3502
ABLIM1	0.275331	4.76151	386.222	0.00672581	all	1.31099
ABR	0.307938	3.18968	37.1084	0.00549497	all	0.982223
ABT1	0.243074	2.56924	24.7549	0.00522615	all	0.624518
ABTB1	0.358268	4.27685	17.2571	0.00674671	all	1.53226
AC004797.1	0.260931	2.65187	1.24923	0.00343393	all	0.691953
AC004967.7	0.394155	3.79121	19.0101	0.0237795	all	1.49432
AC004967.8	0.35334	3.53915	10.6409	0.0199258	all	1.25052
AC007246.3	0.360188	3.47944	5.85517	0.0115973	all	1.25325
AC007318.5	0.341496	4.15811	1.56033	0.0119794	all	1.41998
AC007383.3	0.319108	2.98939	5.70662	0.0175378	all	0.953939
AC007390.5	0.243501	3.17884	31.318	0.00610709	all	0.77405
AC009133.12	0.30104	4.1182	3.28778	0.010467	all	1.23974
AC026271.5	0.250952	3.64529	3.58162	0.00781286	all	0.914794
AC026806.2	0.315173	4.46722	39.9321	0.0108807	all	1.40795
AC027307.3	0.375252	3.83645	1.08329	0.0189268	all	1.43964
AC073346.2	0.26158	3.12784	27.1469	0.0108508	all	0.818182
AC083799.1	0.297303	3.54831	12.0538	0.01336	all	1.05492
AC083899.3	0.293253	3.4943	0.549697	0.010715	all	1.02471
AC093391.2	0.350175	3.68985	2.19432	0.0327184	all	1.29209
ACAD9	0.35813	3.78129	32.0385	0.00884431	all	1.35419
ACBD3	0.158728	2.33625	41.2317	0.00127302	all	0.370829
ACBD6	0.309186	3.42783	28.6769	0.00709652	all	1.05983
ACO2	0.317742	3.56127	35.4648	0.00507056	all	1.13156
ACOT13	0.289721	4.10987	10.0696	0.00720945	all	1.19072
ACOT8	0.249961	3.11457	20.282	0.00506881	all	0.778519
ACOX3	0.310731	3.35345	22.4552	0.00564217	all	1.04202
ACP1	0.224229	2.17234	84.5209	0.00459311	all	0.4871
ACP2	0.251979	2.53585	16.2284	0.00526728	all	0.638981
ACSL4	0.326643	4.29804	23.7912	0.0101647	all	1.40393
ACTG1	0.324925	4.67341	4368.23	0.00508016	all	1.51851
ACTL6A	0.3066	2.9695	51.9874	0.00528863	all	0.910447
ACTR10	0.145032	1.7452	34.557	0.00156246	all	0.253109
ACTR1A	0.189026	2.23002	72.4677	0.00137051	all	0.421532
ACTR1B	0.309688	3.25619	27.665	0.00799331	all	1.0084
ACTR2	0.217119	3.00204	251.599	0.00137036	all	0.651802
ACTR3	0.150183	2.10796	79.7528	0.00223103	all	0.31658
ACTR3B	0.266483	3.48357	1.83053	0.0113489	all	0.928311
ACTR5	0.236554	3.29234	11.9355	0.00394304	all	0.778817
ACTR6	0.322231	3.55933	26.605	0.0144826	all	1.14693
ACTR8	0.284779	3.5436	21.5927	0.00289255	all	1.00914
ACYP1	0.333591	4.74571	11.8051	0.0183699	all	1.58313
ADAM10	0.267628	3.82679	37.5568	0.0046447	all	1.02415
ADAM17	0.274793	3.71025	19.6186	0.00401504	all	1.01955
ADAM9	0.290918	3.57544	36.9037	0.00579019	all	1.04016
ADAT1	0.245255	5.34236	27.3001	0.00646679	all	1.31024
ADCK2	0.265585	3.12622	33.6072	0.00574201	all	0.830277
ADCK4	0.269728	3.01273	12.0569	0.00546157	all	0.812616
ADCY7	0.329001	4.83046	5.15984	0.0123359	all	1.58923
ADD1	0.231445	3.70029	40.0388	0.0022925	all	0.856412
ADH5	0.22996	2.53314	55.8978	0.00324356	all	0.582521
ADI1	0.372801	3.59079	74.8181	0.0111524	all	1.33865
ADIPOR1	0.277592	3.00255	182.517	0.00599094	all	0.833486
ADIPOR2	0.205347	2.18098	57.2319	0.00250592	all	0.447857
ADK	0.178129	1.9282	41.2429	0.00323086	all	0.343468
ADNP2	0.273121	4.07968	150.474	0.00589991	all	1.11425
ADO	0.247353	3.18697	13.1713	0.00475373	all	0.788307
ADORA2B	0.306638	3.93429	7.88101	0.0151052	all	1.2064
ADPGK	0.213263	3.13307	43.3823	0.00353437	all	0.668169
ADPRH	0.348317	3.55703	3.18864	0.0179798	all	1.23898
ADPRHL2	0.276094	4.53101	39.8945	0.00296047	all	1.25099
ADSL	0.164422	1.72793	12.8702	0.00259799	all	0.284109
ADSS	0.267046	3.31843	41.5169	0.00316161	all	0.886173
AFAP1L1	0.335657	4.01432	5.25565	0.0153003	all	1.34743
AFG3L2	0.297694	4.82308	38.5859	0.00649421	all	1.4358
AGA	0.264136	2.90173	21.4608	0.00550335	all	0.766454
AGAP3	0.359901	4.2883	19.9574	0.00494729	all	1.54337
AGBL5	0.262211	2.8789	12.5547	0.00667653	all	0.75488
AGFG1	0.210473	2.32273	77.5359	0.00421267	all	0.488871
AGGF1	0.281137	3.86494	19.5611	0.00452827	all	1.08658
AGK	0.301688	4.61875	20.2472	0.00451588	all	1.39342
AGPAT5	0.346682	3.84494	11.3175	0.01069	all	1.33297
AGPAT6	0.209001	3.62704	16.8404	0.0026857	all	0.758054
AGPS	0.275713	3.96531	13.7362	0.00501276	all	1.09329
AHCY	0.315427	4.45495	66.7617	0.00373711	all	1.40521
AHCYL1	0.274972	3.38344	114.665	0.00443049	all	0.930352
AHSA1	0.194714	2.43273	62.3236	0.00178143	all	0.473687
AIDA	0.191053	2.42369	78.3635	0.0027754	all	0.463053
AIF1L	0.335091	4.79956	10.7538	0.0175398	all	1.60829
AIFM1	0.340501	4.34842	22.9831	0.00870968	all	1.48064
AIG1	0.253055	3.43424	32.3623	0.0073037	all	0.869053
AIM1	0.28668	3.74248	106.077	0.00485769	all	1.07289
AIMP1	0.184357	2.16288	33.316	0.00310452	all	0.398742
AIMP2	0.238886	3.25552	13.8982	0.00543386	all	0.777698
AK2	0.24731	2.52174	198.179	0.00406158	all	0.623653
AK3	0.313665	3.89008	113.287	0.00980363	all	1.22018
AK4	0.293992	3.30109	19.858	0.00747341	all	0.970493
AKAP8	0.248055	5.23921	23.3263	0.00419232	all	1.29961
AKIP1	0.276331	3.07123	16.4789	0.0103149	all	0.848673
AKIRIN1	0.189536	2.34979	36.2058	0.0014503	all	0.44537
AKR1A1	0.26369	2.53038	89.6308	0.00601771	all	0.667236
AKR1B1	0.357047	3.81968	17.0337	0.0144393	all	1.36381
AKR7A2	0.224977	2.49711	24.7239	0.00531492	all	0.561794
AKT1	0.308653	3.96144	48.9567	0.00214041	all	1.22271
AKT2	0.250211	2.77961	94.6688	0.00151759	all	0.695491
AKTIP	0.318321	3.35842	13.3486	0.00287585	all	1.06906
ALDH18A1	0.280141	4.11679	32.0434	0.00577363	all	1.15328
ALDH7A1	0.269251	2.89029	29.8135	0.00526084	all	0.778212
ALDH9A1	0.354456	4.40139	101.083	0.0085962	all	1.5601
ALDOC	0.207002	2.25736	14.1488	0.00536117	all	0.467278
ALG1	0.229996	2.62598	7.11742	0.0033535	all	0.603964
ALG12	0.269714	3.17171	16.2187	0.00342129	all	0.855454
ALG13	0.370904	4.20421	11.734	0.0045686	all	1.55936
ALG14	0.277343	2.9373	28.0565	0.0158613	all	0.814637
ALG2	0.15661	1.88769	14.93	0.00322819	all	0.295633
ALG5	0.222789	2.40903	32.426	0.00747851	all	0.536708
ALG6	0.379506	4.17879	7.82328	0.00609498	all	1.58588
ALG8	0.210537	3.50983	19.3764	0.00467525	all	0.738949
ALKBH1	0.245	2.53206	6.76276	0.00615353	all	0.620353
ALKBH3	0.230489	2.58352	16.7725	0.00414528	all	0.595474
ALKBH4	0.298616	3.92145	8.56043	0.00785266	all	1.17101
ALKBH5	0.251958	2.30489	26.0484	0.00293263	all	0.580735
ALYREF	0.294491	3.96605	66.3973	0.00437011	all	1.16797
AMBRA1	0.231468	3.1601	9.92607	0.00441098	all	0.73146
AMD1	0.169828	1.98829	75.7858	0.0023398	all	0.337668
AMFR	0.191925	2.00585	40.1576	0.00198433	all	0.384973
AMMECR1	0.278859	2.82044	37.3695	0.00708036	all	0.786506
AMMECR1L	0.244986	4.225	15.6062	0.00458429	all	1.03507
AMN1	0.336301	4.22677	4.97355	0.0124399	all	1.42147
AMOTL1	0.283444	3.80078	31.4147	0.00606258	all	1.07731
AMOTL2	0.271634	3.67231	47.1398	0.00431541	all	0.997524
AMPD3	0.346359	4.16309	32.5566	0.0137133	all	1.44193
AMZ2	0.2325	2.23512	49.4289	0.00402931	all	0.519664
ANAPC13	0.231436	2.63933	48.3237	0.00509292	all	0.610834
ANAPC15	0.33583	3.85137	10.7205	0.0172563	all	1.2934
ANAPC16	0.23028	2.51863	25.415	0.00536263	all	0.57999
ANAPC5	0.294876	4.09453	94.4447	0.0031535	all	1.20738
ANAPC7	0.337249	4.66801	30.7592	0.00667742	all	1.57428
ANKEF1	0.2609	3.14807	9.14661	0.00516704	all	0.821331
ANKH	0.269523	3.44075	20.0671	0.00579188	all	0.927361
ANKLE2	0.23528	3.46064	78.8796	0.00267698	all	0.814218
ANKRD13A	0.197946	3.19916	33.1662	0.0017929	all	0.633261
ANKRD13C	0.299149	3.94623	15.7566	0.0021724	all	1.18051
ANKRD16	0.215019	3.33039	4.85422	0.00730968	all	0.716096
ANKRD22	0.265747	3.49021	50.5459	0.00811584	all	0.927512
ANKRD27	0.222182	3.41999	11.1919	0.00360833	all	0.759859
ANKRD40	0.231844	3.19709	15.2805	0.00280093	all	0.741226
ANKRD46	0.319397	3.45613	5.67055	0.0069196	all	1.10388
ANO10	0.300028	4.08819	32.5426	0.00589209	all	1.22657
ANP32A	0.257349	2.67227	123.979	0.00393654	all	0.687708
ANXA11	0.172035	2.45721	91.3736	0.00403873	all	0.422725
ANXA2	0.229533	2.48613	797.559	0.00774024	all	0.57065
ANXA2P2	0.271881	2.40297	3.23777	0.0136937	all	0.653322
ANXA4	0.257216	3.10658	28.2252	0.00343579	all	0.799062
ANXA5	0.285056	2.8605	150.578	0.00840398	all	0.815402
ANXA7	0.175503	1.85721	94.0239	0.0022082	all	0.325946
ANXA8L2	0.196754	2.34194	22.4361	0.00523	all	0.460787
AP001372.2	0.336716	3.93957	3.589	0.0181699	all	1.32652
AP1B1	0.346301	4.62985	44.7959	0.00338925	all	1.60332
AP1G1	0.180413	2.92015	60.3151	0.00178811	all	0.526834
AP1M1	0.301806	4.68841	26.3398	0.00266989	all	1.41499
AP1M2	0.220743	2.78417	29.7174	0.00376102	all	0.614586
AP1S1	0.343119	3.85589	109.712	0.0100913	all	1.32303
AP1S3	0.285982	3.6059	6.68521	0.00886132	all	1.03122
AP2A2	0.255275	2.56583	19.5588	0.00270694	all	0.654991
AP2B1	0.256952	3.02195	59.3925	0.00424145	all	0.776498
AP2M1	0.328191	4.69959	129.073	0.00385065	all	1.54236
AP3B1	0.266246	3.3139	35.139	0.0018182	all	0.882313
AP3M1	0.163722	2.0125	35.0651	0.00172614	all	0.329491
AP3S1	0.171246	1.98257	64.3688	0.00487117	all	0.339508
AP3S2	0.293051	5.08516	35.8197	0.0111793	all	1.49021
AP4B1	0.333816	4.72644	10.8922	0.0120496	all	1.57776
AP4E1	0.258966	5.47204	11.5239	0.00316078	all	1.41707
AP5M1	0.305336	3.52342	69.8252	0.00406733	all	1.07583
AP5S1	0.293909	3.33681	9.87553	0.00503107	all	0.980721
APEH	0.328487	4.05005	53.556	0.0031168	all	1.33039
APEX1	0.272902	3.50188	236.192	0.00316168	all	0.955668
APEX2	0.268377	3.27498	18.2276	0.00159775	all	0.878929
APH1A	0.278479	3.58325	133.152	0.00278616	all	0.997859
API5	0.194148	2.7925	48.2892	0.00229722	all	0.542158
APIP	0.296731	2.60975	11.7904	0.00613117	all	0.774392
APLP2	0.235744	3.22431	100.482	0.00357409	all	0.760114
APOA1BP	0.311967	3.33	41.8797	0.00548598	all	1.03885
APOM	0.373046	3.74811	4.22361	0.0183572	all	1.39822
APOPT1	0.279749	2.84316	8.42459	0.00902856	all	0.795373
APPL2	0.24881	2.53887	98.9733	0.00409675	all	0.631697
APTX	0.166514	1.97904	34.539	0.00281156	all	0.329537
ARAP1	0.329203	4.86976	27.1897	0.00625738	all	1.60314
ARCN1	0.16293	2.02495	42.1149	0.00131828	all	0.329926
AREL1	0.208201	3.72047	19.9321	0.00286373	all	0.774604
ARF1	0.253765	3.49669	444.258	0.00243912	all	0.887338
ARF3	0.32099	3.92999	342.543	0.00212593	all	1.26149
ARF4	0.230193	3.41807	200.843	0.00405614	all	0.786817
ARF5	0.274533	3.61091	128.549	0.00323758	all	0.991312
ARF6	0.302776	3.87552	152.625	0.00196164	all	1.17341
ARFGAP2	0.2148	3.1633	81.7486	0.00306863	all	0.679478
ARFGAP3	0.278693	2.5823	18.8643	0.00313937	all	0.71967
ARFIP1	0.279919	3.31594	23.2763	0.00239286	all	0.928193
ARFIP2	0.219162	2.52707	36.7324	0.00221583	all	0.553838
ARFRP1	0.283142	3.4289	33.2179	0.00324396	all	0.970867
ARHGAP17	0.209151	3.07259	13.7437	0.00295809	all	0.642637
ARHGAP22	0.382768	4.08744	3.95338	0.0199029	all	1.56454
ARHGAP32	0.246921	4.59628	15.4772	0.00571354	all	1.13492
ARHGEF10L	0.313956	4.31217	12.5289	0.00820032	all	1.35383
ARHGEF2	0.327525	3.51089	12.589	0.00677042	all	1.1499
ARHGEF3	0.220618	3.37887	15.4476	0.00412225	all	0.745438
ARHGEF5	0.243572	3.3426	16.2256	0.00465449	all	0.814166
ARIH2	0.203161	3.28748	42.858	0.00268173	all	0.667887
ARL1	0.227649	2.35805	110.797	0.00311293	all	0.536807
ARL14EP	0.313458	3.71966	18.7868	0.00369839	all	1.16596
ARL16	0.318942	3.46263	31.7586	0.0101362	all	1.10438
ARL2	0.297942	4.84343	16.3833	0.00542088	all	1.44306
ARL2BP	0.173705	1.83689	44.4628	0.00310057	all	0.319078
ARL3	0.343836	4.20597	23.4987	0.010937	all	1.44617
ARL5B	0.266718	2.97329	17.3001	0.00455966	all	0.793029
ARL6IP1	0.247355	2.59186	91.7479	0.00512848	all	0.641108
ARL6IP5	0.35905	4.21704	369.833	0.0154217	all	1.51413
ARL6IP6	0.25337	2.77386	29.4613	0.0040609	all	0.702813
ARL8B	0.160727	2.27086	117.261	0.00238259	all	0.364988
ARMC1	0.209283	2.87867	27.5838	0.00315489	all	0.602458
ARMC10	0.210003	2.48333	28.8012	0.00364392	all	0.521507
ARMC7	0.265666	3.3695	15.1716	0.00419794	all	0.895162
ARMC8	0.286538	4.21999	15.0881	0.00166943	all	1.20919
ARNT	0.331253	4.30356	44.2425	0.00376538	all	1.42557
ARPC1A	0.223607	2.6335	90.7874	0.00278891	all	0.588868
ARPC2	0.223171	2.42805	354.358	0.00446749	all	0.541871
ARPC3	0.352599	3.82472	216.389	0.00904405	all	1.34859
ARPC4	0.257052	3.28142	84.5436	0.0037161	all	0.843494
ARPC5	0.226484	2.4647	60.1409	0.00339471	all	0.558215
ARPC5L	0.3225	4.89306	39.3019	0.00515648	all	1.57801
ARPP19	0.189029	2.51333	525.067	0.0018557	all	0.475091
ARRB1	0.257198	3.458	19.1738	0.00646009	all	0.889391
ARRDC3	0.3471	3.84841	84.9898	0.00358189	all	1.33578
ARRDC4	0.287281	2.99119	57.7762	0.00825861	all	0.85931
ARSD	0.302031	4.36052	8.12249	0.0102934	all	1.31701
ARV1	0.26378	2.40094	31.1803	0.00723703	all	0.633318
ASAH1	0.356734	3.56472	84.9224	0.00292457	all	1.27166
ASAH2B	0.274751	4.88424	9.75016	0.0138947	all	1.34195
ASAP3	0.282818	3.25718	41.8002	0.00518649	all	0.921188
ASB1	0.271561	4.41371	7.50423	0.00596305	all	1.19859
ASB6	0.291343	3.54383	14.1351	0.00416771	all	1.03247
ASB7	0.217023	3.25766	7.45069	0.00287002	all	0.706987
ASB8	0.168046	2.4782	49.7349	0.00198613	all	0.416453
ASCC1	0.15475	1.91137	15.8319	0.00227769	all	0.295785
ASCC2	0.268825	3.69861	38.0819	0.00149252	all	0.99428
ASF1A	0.286972	3.19346	19.106	0.00333496	all	0.916435
ASH2L	0.224945	3.00818	15.8095	0.00310492	all	0.676673
ASL	0.269479	3.67254	7.74504	0.00663616	all	0.98967
ASNA1	0.29062	4.04959	56.8333	0.00296727	all	1.17689
ASNSD1	0.15866	1.80564	30.4427	0.00165128	all	0.286484
ASPSCR1	0.353332	4.36811	24.6907	0.00568196	all	1.54339
ASUN	0.174868	2.07101	19.9743	0.00270406	all	0.362153
ASXL2	0.258352	4.82877	38.6048	0.00591561	all	1.24752
ATAD1	0.267046	3.30701	27.4157	0.00304445	all	0.883124
ATE1	0.240886	3.50315	43.2374	0.00344392	all	0.84386
ATF1	0.188976	2.47763	18.1488	0.00276768	all	0.468211
ATF4	0.286461	3.56992	188.365	0.0038152	all	1.02264
ATF6	0.328708	3.86947	21.0287	0.00205501	all	1.27193
ATF7	0.346706	4.33589	13.3904	0.00711139	all	1.50328
ATG12	0.364534	3.82496	86.2058	0.00354116	all	1.39433
ATG13	0.204707	2.29612	57.8946	0.00178606	all	0.470031
ATG3	0.162154	1.78339	27.2758	0.0025196	all	0.289184
ATG4A	0.172349	2.27413	7.81377	0.00433049	all	0.391944
ATG4B	0.292592	3.32627	24.649	0.0029999	all	0.97324
ATG5	0.231878	2.25563	8.12832	0.00343595	all	0.523033
ATL2	0.27719	4.58751	82.9388	0.00395678	all	1.27161
ATMIN	0.168555	2.0448	21.4989	0.00171949	all	0.34466
ATOX1	0.224745	2.37008	79.9178	0.00622738	all	0.532665
ATP11B	0.325214	3.95666	42.9549	0.00283827	all	1.28676
ATP1B3	0.356594	4.1275	218.861	0.00956306	all	1.47184
ATP2C1	0.219631	2.9682	49.8678	0.00295361	all	0.651908
ATP5A1	0.349694	4.32595	357.238	0.0102781	all	1.51276
ATP5B	0.338573	4.5244	703.553	0.00615159	all	1.53184
ATP5C1	0.243673	2.22673	206.611	0.0056313	all	0.542595
ATP5E	0.36051	3.72169	92.646	0.0145166	all	1.3417
ATP5F1	0.243131	2.58566	84.7327	0.00718388	all	0.628655
ATP5G1	0.328929	4.13788	94.8653	0.00745493	all	1.36107
ATP5G2	0.299881	3.24253	157.719	0.00691402	all	0.972371
ATP5H	0.221344	2.50904	91.0382	0.00764785	all	0.555361
ATP5J	0.338427	3.92235	52.9039	0.010007	all	1.32743
ATP5J2	0.332277	3.61044	57.5489	0.0130321	all	1.19966
ATP5L	0.35122	3.41136	49.1544	0.0158875	all	1.19814
ATP5O	0.274802	3.16006	32.9216	0.0139286	all	0.868391
ATP5S	0.302634	3.33951	26.7518	0.00640897	all	1.01065
ATP5SL	0.226519	2.61156	19.782	0.00240455	all	0.591568
ATP6AP1	0.302783	3.4215	67.8518	0.0023382	all	1.03597
ATP6AP2	0.17207	2.03418	105.702	0.00174282	all	0.35002
ATP6V0A1	0.247556	3.77485	19.9256	0.00509608	all	0.934486
ATP6V0D1	0.256101	3.08055	46.0237	0.00258041	all	0.788932
ATP6V0E1	0.307789	3.37832	100.914	0.00923049	all	1.03981
ATP6V1A	0.243462	3.67119	121.857	0.00268391	all	0.893798
ATP6V1B2	0.210878	2.27566	38.3692	0.00198319	all	0.479885
ATP6V1C1	0.253145	4.04234	50.272	0.00391796	all	1.0233
ATP6V1D	0.207762	2.35496	44.6212	0.00653537	all	0.489272
ATP6V1E1	0.169616	1.89472	118.367	0.00273199	all	0.321374
ATP6V1E2	0.338628	4.0635	8.65439	0.0185803	all	1.37601
ATP6V1G1	0.324312	3.87815	160.292	0.0100444	all	1.25773
ATP6V1H	0.137362	1.9375	31.3378	0.00170921	all	0.266139
ATP8B1	0.297033	5.46805	16.3375	0.00559961	all	1.62419
ATPAF1	0.297598	4.27381	26.1908	0.00756348	all	1.27188
ATPAF2	0.169399	1.99806	13.8832	0.00361138	all	0.33847
ATPIF1	0.255896	3.33316	53.2054	0.00326909	all	0.852944
ATRAID	0.294035	3.12567	77.6436	0.00908808	all	0.919056
ATRIP	0.254956	2.87565	7.41288	0.00585963	all	0.733166
ATXN1	0.362139	4.36356	12.294	0.00975313	all	1.58022
ATXN10	0.212094	2.26604	42.312	0.00264512	all	0.480613
ATXN7L3	0.298706	3.14716	143.757	0.00289946	all	0.940077
ATXN7L3B	0.232348	3.71759	41.1829	0.00389448	all	0.863776
AUP1	0.275227	3.53637	87.2869	0.00348775	all	0.973304
AVEN	0.264663	3.12534	27.4838	0.00819338	all	0.827161
AZI2	0.237944	2.68683	14.3079	0.00358621	all	0.639316
AZIN1	0.300051	4.47801	123.899	0.00569338	all	1.34363
B3GALTL	0.296324	4.46334	6.48552	0.00926683	all	1.3226
B3GAT3	0.345529	4.45229	28.1503	0.00575048	all	1.53839
B3GNT1	0.336461	3.82278	9.30251	0.0104268	all	1.28622
B3GNT2	0.208844	2.14063	22.8984	0.00427746	all	0.447059
B4GALT3	0.233876	2.17217	20.9985	0.00319154	all	0.508018
B4GALT4	0.372548	4.31441	10.3638	0.00479973	all	1.60732
B4GALT7	0.296399	4.00606	9.71747	0.00348503	all	1.18739
B9D1	0.356216	3.9911	8.77652	0.011826	all	1.42169
B9D2	0.299505	4.04151	4.90769	0.0113138	all	1.21045
BABAM1	0.24061	2.45851	12.9621	0.00501749	all	0.591541
BACE1	0.310541	5.09012	53.8974	0.00899872	all	1.58069
BACE2	0.243419	2.93523	16.9041	0.0056455	all	0.714492
BAD	0.307716	3.89461	13.4399	0.0126059	all	1.19844
BAG1	0.183826	2.34437	114.133	0.00325901	all	0.430956
BAG5	0.220232	3.21891	190.376	0.00266863	all	0.708907
BAIAP2	0.289746	3.34052	21.0391	0.00396096	all	0.967903
BAIAP2L1	0.332004	4.71881	15.6314	0.00853262	all	1.56666
BANP	0.254271	3.7483	5.13213	0.00967871	all	0.953083
BCAS2	0.221375	2.26442	41.3036	0.0047538	all	0.501285
BCCIP	0.20679	2.59465	24.1879	0.00475844	all	0.536549
BCDIN3D	0.221974	2.4625	4.23793	0.00752688	all	0.54661
BCL10	0.153742	2.18585	18.0783	0.00343181	all	0.336057
BCL2L13	0.208359	2.34757	14.4729	0.00280558	all	0.489138
BCL2L2	0.258116	3.83344	243.778	0.00607029	all	0.989473
BCL7C	0.186357	2.44753	13.6941	0.00700069	all	0.456116
BDH1	0.239296	2.29259	27.055	0.00457139	all	0.548608
BECN1	0.154089	1.85415	39.85	0.00182885	all	0.285704
BET1	0.279085	3.1426	5.52268	0.0106674	all	0.877051
BFAR	0.178415	1.9398	16.263	0.0032849	all	0.346089
BFSP1	0.353767	4.46597	1.77464	0.0189395	all	1.57991
BICD2	0.305902	3.33564	131.228	0.00757677	all	1.02038
BID	0.344349	3.47049	39.6055	0.0140679	all	1.19506
BIN3	0.222595	3.5486	15.443	0.00591286	all	0.789898
BIRC2	0.303703	3.63129	44.6157	0.00309082	all	1.10283
BLCAP	0.207345	2.45853	169.904	0.00268528	all	0.509763
BLOC1S1	0.395367	3.62623	11.4099	0.0154642	all	1.43369
BLOC1S2	0.252809	3.64117	77.8804	0.00530069	all	0.92052
BLOC1S5	0.370734	4.03099	16.8169	0.0110635	all	1.49442
BLOC1S6	0.216717	3.01883	28.6797	0.00300161	all	0.654231
BLVRA	0.236088	2.67301	24.6239	0.00919832	all	0.631065
BLVRB	0.288467	2.83122	47.3571	0.00872029	all	0.816714
BLZF1	0.190455	2.09908	38.4318	0.00295634	all	0.39978
BMS1	0.253781	4.47515	33.8558	0.00571833	all	1.13571
BNIP1	0.227468	2.40598	4.20651	0.00880534	all	0.547284
BNIP3L	0.277791	3.22699	326.729	0.00749246	all	0.896429
BNIPL	0.323642	4.04022	119.383	0.0126515	all	1.30759
BOD1	0.292225	3.39264	37.7528	0.00811442	all	0.991416
BOLA2B	0.40141	3.89748	1.56361	0.0151792	all	1.56449
BPHL	0.319356	3.36934	7.52885	0.0125123	all	1.07602
BPNT1	0.237919	2.74567	34.1284	0.00344007	all	0.653247
BRAP	0.212413	2.9314	26.9085	0.00225269	all	0.622669
BRCC3	0.176594	2.79024	9.97849	0.00268176	all	0.49274
BRD7	0.244102	3.99751	53.3636	0.00390543	all	0.975803
BRE	0.24447	3.30368	17.1127	0.00620774	all	0.80765
BRF2	0.233686	2.44118	9.52562	0.0086629	all	0.57047
BRI3	0.347892	3.6741	43.9278	0.0146531	all	1.27819
BRIX1	0.232536	2.63905	30.7571	0.00493513	all	0.613674
BRK1	0.278756	3.39033	243.146	0.00648506	all	0.945075
BRMS1	0.270868	3.53677	52.4639	0.00248697	all	0.957996
BRMS1L	0.309435	4.42274	13.2675	0.0105804	all	1.36855
BROX	0.291522	3.26955	39.4343	0.00371104	all	0.953144
BSCL2	0.295054	3.12997	1.06795	0.00844378	all	0.92351
BSDC1	0.179971	2.76446	41.6399	0.00245073	all	0.497524
BSPRY	0.298749	2.91545	17.548	0.0103274	all	0.870985
BTBD1	0.178614	2.27195	47.016	0.00248875	all	0.405802
BTBD10	0.204325	2.40068	31.8075	0.00236265	all	0.490519
BTBD11	0.305842	3.18237	12.1097	0.00596257	all	0.973303
BTBD3	0.299468	4.72461	19.3425	0.00385442	all	1.41487
BTBD6	0.30435	3.82381	33.4256	0.00364666	all	1.16378
BTBD7	0.288633	4.16947	12.2917	0.00513023	all	1.20345
BTBD9	0.258437	3.56893	33.3486	0.00443938	all	0.922343
BTF3	0.244887	2.5043	746.177	0.00613898	all	0.613272
BTF3L4	0.198324	2.28109	193.469	0.0026605	all	0.452396
BTG1	0.299871	3.58884	790.492	0.00769898	all	1.07619
BTG2	0.326282	4.08861	49.3401	0.00596714	all	1.33404
BTG3	0.252582	2.79188	49.9552	0.00667408	all	0.705179
BTRC	0.233452	3.41945	6.8805	0.00386975	all	0.798279
BUB3	0.211119	2.56175	95.0131	0.00288692	all	0.540833
BUD13	0.28996	4.63444	17.1122	0.00592105	all	1.3438
BUD31	0.255434	2.91965	24.0002	0.00661282	all	0.745779
BYSL	0.312225	4.7283	19.1228	0.00284071	all	1.47629
BZW1	0.290607	3.20633	275.682	0.00709997	all	0.931783
BZW1P2	0.333052	4.3398	4.70051	0.0222149	all	1.44538
BZW2	0.264379	2.61136	57.8711	0.00502254	all	0.690387
C10orf32	0.293606	3.16463	39.347	0.0101052	all	0.929152
C10orf54	0.364238	4.17475	17.0291	0.0112084	all	1.5206
C10orf76	0.194845	2.67985	17.521	0.00218751	all	0.522155
C10orf88	0.221004	3.1281	9.16822	0.00541359	all	0.691322
C11orf24	0.310725	4.48056	34.3588	0.00288971	all	1.39222
C11orf31	0.305547	3.79422	21.4729	0.0078657	all	1.15931
C11orf48	0.254298	2.79068	12.9171	0.00705818	all	0.709664
C11orf49	0.324019	4.14347	8.54827	0.00467675	all	1.34256
C11orf57	0.26647	3.05156	51.3062	0.00395831	all	0.813149
C11orf58	0.151423	1.93456	224.812	0.00149762	all	0.292937
C11orf68	0.31669	4.5933	10.8524	0.00631032	all	1.45465
C11orf71	0.35391	3.09123	7.55534	0.0127059	all	1.09402
C11orf73	0.24644	3.15012	22.1119	0.00730465	all	0.776314
C12orf10	0.255013	3.33396	19.7762	0.00503423	all	0.850206
C12orf29	0.242415	2.68682	22.985	0.00399204	all	0.651326
C12orf4	0.206735	2.44929	21.5644	0.00312258	all	0.506353
C12orf43	0.215993	2.48361	10.4956	0.00408333	all	0.536442
C12orf44	0.257301	3.49722	38.0929	0.00384836	all	0.899839
C12orf45	0.314405	3.04521	11.0346	0.0180266	all	0.95743
C12orf49	0.175679	2.09333	17.3261	0.00223448	all	0.367754
C12orf52	0.288389	4.39734	8.91364	0.00399929	all	1.26815
C12orf65	0.256402	3.25166	18.8916	0.00552528	all	0.833731
C12orf66	0.315217	3.80368	5.58563	0.00641831	all	1.19898
C12orf73	0.285801	3.21772	8.01904	0.010987	all	0.919628
C14orf119	0.181497	1.97861	86.1282	0.00516555	all	0.359112
C14orf142	0.27115	3.20556	33.4923	0.0163905	all	0.869189
C14orf166	0.148012	1.98729	111.014	0.00299303	all	0.294143
C14orf2	0.294286	2.57855	44.097	0.00959136	all	0.758831
C15orf38	0.248738	5.70105	18.9429	0.00684603	all	1.41807
C15orf40	0.252931	2.27306	35.1873	0.00673401	all	0.574927
C15orf61	0.29467	3.60352	12.3029	0.0170854	all	1.06185
C15orf62	0.323779	3.82837	10.8615	0.0179253	all	1.23955
C16orf55	0.252991	2.56999	17.0614	0.00965474	all	0.650186
C16orf58	0.297932	3.49602	22.2741	0.00600893	all	1.04158
C16orf62	0.217162	2.40413	12.24	0.00328884	all	0.522087
C16orf70	0.200466	2.79481	17.1032	0.00300541	all	0.560266
C16orf72	0.192908	2.26585	23.835	0.0026429	all	0.437101
C16orf80	0.184281	2.07334	14.1562	0.00424714	all	0.382078
C16orf87	0.291136	3.06573	18.8777	0.00754488	all	0.892544
C16orf91	0.280757	3.35528	20.0157	0.00661514	all	0.942018
C17orf103	0.345512	4.55976	3.87534	0.00783	all	1.57545
C17orf51	0.338982	4.63984	8.39314	0.0196973	all	1.57282
C17orf58	0.253746	2.90158	8.98615	0.0079395	all	0.736264
C17orf59	0.314351	4.85623	12.5257	0.00467755	all	1.52656
C17orf75	0.302573	5.29811	10.1378	0.00634346	all	1.60306
C17orf76-AS1	0.378075	3.94212	229.624	0.0193195	all	1.49042
C17orf89	0.272114	3.31849	26.6907	0.00897089	all	0.903007
C18orf21	0.1638	1.94848	20.1877	0.00405698	all	0.319161
C18orf25	0.282979	5.37589	10.2759	0.00464599	all	1.52126
C18orf8	0.229164	2.97923	12.6061	0.00309348	all	0.682733
C19orf12	0.223763	2.26335	57.7045	0.00446547	all	0.506454
C19orf25	0.28347	3.8227	13.4191	0.00431885	all	1.08362
C19orf40	0.324373	4.24492	4.79694	0.0141761	all	1.37694
C19orf43	0.262643	3.24977	91.6499	0.00405124	all	0.853528
C19orf47	0.315688	4.36746	19.4896	0.00314502	all	1.37876
C19orf52	0.257914	3.05213	64.4164	0.00511475	all	0.787188
C19orf53	0.351543	4.53746	89.2606	0.00934455	all	1.59511
C1D	0.213063	3.11087	20.7454	0.00647221	all	0.662811
C1GALT1	0.363302	4.27085	8.66227	0.00549337	all	1.55161
C1GALT1C1	0.246	2.66034	14.7383	0.00507502	all	0.654443
C1orf106	0.357113	3.75603	48.5381	0.00718301	all	1.34133
C1orf109	0.309355	4.04921	12.617	0.00715437	all	1.25264
C1orf116	0.338033	3.22639	30.9622	0.00709065	all	1.09063
C1orf123	0.21794	2.29411	15.2725	0.00571228	all	0.499978
C1orf131	0.218818	2.83408	7.54915	0.00450089	all	0.62015
C1orf174	0.271493	2.60254	8.25899	0.00287916	all	0.706573
C1orf198	0.312248	3.84778	33.476	0.0027658	all	1.20146
C1orf216	0.255682	2.68815	54.0392	0.00690796	all	0.687311
C1orf43	0.232924	2.61477	121.281	0.00447834	all	0.609042
C1orf50	0.199741	2.24894	7.76506	0.00885009	all	0.449205
C1orf52	0.222125	2.74255	69.7458	0.00432538	all	0.609188
C1orf56	0.35173	4.59126	16.9784	0.021155	all	1.61488
C1orf85	0.236487	2.68559	17.862	0.00370606	all	0.635108
C1QBP	0.280486	3.34362	143.78	0.00716543	all	0.937838
C1RL	0.280465	3.81645	31.1873	0.0051177	all	1.07038
C20orf111	0.249042	2.65096	25.9867	0.00635931	all	0.660201
C20orf196	0.296596	2.76642	8.82286	0.0120058	all	0.820508
C21orf59	0.272772	3.14599	9.46888	0.00900401	all	0.858136
C22orf28	0.142189	1.6555	75.1793	0.00165982	all	0.235394
C22orf39	0.250669	3.38654	4.82215	0.00684973	all	0.848902
C2orf16	0.322799	4.38809	0.51009	0.0165339	all	1.41647
C2orf42	0.266003	3.35082	6.89228	0.00749159	all	0.891329
C2orf43	0.344836	4.63499	7.02213	0.00753993	all	1.59831
C2orf44	0.310174	4.42717	4.77211	0.0127264	all	1.37319
C2orf47	0.163856	1.73977	27.0455	0.00628563	all	0.28507
C2orf49	0.307019	3.96282	63.9525	0.00369939	all	1.21666
C2orf68	0.269154	3.08543	17.1568	0.00606194	all	0.830457
C2orf69	0.206419	2.30407	63.3347	0.00369819	all	0.475604
C2orf76	0.279518	2.98179	14.2535	0.0151813	all	0.833463
C3orf17	0.300652	4.04429	21.0939	0.00535284	all	1.21592
C3orf37	0.32132	4.03174	64.2326	0.00321187	all	1.29548
C3orf38	0.330888	3.14233	27.1825	0.00367036	all	1.03976
C4orf27	0.302556	3.02139	25.8208	0.0133658	all	0.914141
C4orf3	0.241172	2.60438	134.905	0.00551945	all	0.628104
C4orf32	0.257023	2.95659	16.4753	0.00867864	all	0.759911
C4orf33	0.320273	3.55636	15.4457	0.0147687	all	1.13901
C4orf36	0.396705	3.87997	3.7562	0.00888368	all	1.5392
C5orf15	0.271657	2.84551	179.243	0.00600482	all	0.773003
C5orf22	0.301133	4.57743	7.92035	0.00588825	all	1.37842
C5orf24	0.301781	4.80755	126.38	0.00839099	all	1.45083
C5orf28	0.216996	2.58274	9.09978	0.00459176	all	0.560443
C5orf51	0.261869	3.37533	17.0646	0.00481119	all	0.883896
C6orf1	0.338058	4.75328	21.6368	0.00761911	all	1.60688
C6orf106	0.3346	4.43576	365.993	0.00424786	all	1.4842
C6orf120	0.187454	2.37487	13.8433	0.00277626	all	0.44518
C6orf203	0.240574	2.67116	12.4838	0.00846193	all	0.642612
C6orf211	0.160305	1.76013	14.7736	0.00311532	all	0.282158
C6orf47	0.233216	3.0167	16.5144	0.00253814	all	0.703542
C6orf57	0.310831	2.92577	10.3826	0.0175834	all	0.909423
C6orf62	0.260303	3.26043	513.753	0.00285943	all	0.8487
C6orf89	0.165824	2.04463	54.0075	0.00182184	all	0.339049
C7orf10	0.359491	3.33782	1.34754	0.0292667	all	1.19992
C7orf26	0.327236	3.70116	32.7993	0.00487985	all	1.21116
C7orf31	0.40398	3.87621	4.27135	0.0203474	all	1.56591
C7orf49	0.221431	2.2395	60.4463	0.00321026	all	0.495895
C7orf60	0.336625	4.11758	27.3562	0.00605944	all	1.38608
C7orf73	0.313905	4.76072	48.4964	0.00582963	all	1.49442
C8orf58	0.25786	2.36029	8.1612	0.00834218	all	0.608623
C8orf59	0.280756	2.74206	28.2462	0.00827046	all	0.769849
C9orf123	0.266747	2.78096	95.7961	0.0101663	all	0.741813
C9orf156	0.298571	2.89783	28.6009	0.00569859	all	0.865207
C9orf3	0.36458	4.01336	74.5371	0.00849597	all	1.46319
C9orf37	0.301557	2.75663	4.41236	0.0142883	all	0.831282
C9orf41	0.244386	2.58466	12.3106	0.00600422	all	0.631656
C9orf64	0.204906	1.96964	8.20637	0.00392107	all	0.403591
C9orf78	0.185498	1.83927	45.0745	0.00352524	all	0.341182
C9orf85	0.283113	2.53513	41.6453	0.00499728	all	0.717729
C9orf89	0.326093	4.00652	10.981	0.00861721	all	1.3065
C9orf9	0.344758	4.43017	17.5953	0.0184003	all	1.52734
CA12	0.342233	3.65333	50.0662	0.010253	all	1.25029
CA5BP1	0.258603	2.7892	18.6921	0.00913079	all	0.721297
CAAP1	0.285751	3.02628	63.4473	0.00811244	all	0.864763
CAB39	0.189101	2.01081	185.671	0.00179514	all	0.380248
CACUL1	0.255431	3.55511	60.9943	0.00320516	all	0.908087
CACYBP	0.215441	2.24072	71.6213	0.00363235	all	0.482743
CALCOCO2	0.242693	3.00954	65.9871	0.00195663	all	0.730394
CALM1	0.203646	2.30894	444.582	0.0039374	all	0.470206
CALM2	0.241307	2.53071	570.433	0.00656461	all	0.610678
CALM3	0.292942	3.56328	86.0896	0.00230345	all	1.04384
CALR	0.308854	4.50821	318.514	0.00263303	all	1.39238
CALU	0.275816	2.56311	60.8112	0.00521605	all	0.706948
CAMK1	0.345318	4.33277	1.09123	0.0145439	all	1.49618
CAMK2D	0.353028	4.18739	33.1557	0.0041583	all	1.47827
CAMKK2	0.293895	3.73358	45.1172	0.00391553	all	1.09728
CAMLG	0.204124	2.13845	24.399	0.00444076	all	0.436508
CAMTA1	0.189206	2.70212	5.4476	0.00403473	all	0.511258
CAND1	0.283389	5.01573	28.7762	0.0046262	all	1.4214
CANT1	0.316568	4.91831	100.428	0.00278742	all	1.55698
CANX	0.292274	3.86648	255.239	0.00734951	all	1.13007
CAP1	0.233336	2.64194	229.548	0.00463057	all	0.61646
CAPG	0.306446	3.93078	281.884	0.00898389	all	1.20457
CAPN2	0.261395	2.83039	61.7997	0.00418639	all	0.739849
CAPNS2	0.315247	3.51724	86.2318	0.00810475	all	1.1088
CAPRIN1	0.19952	2.51094	74.5793	0.00214423	all	0.500982
CAPZA1	0.165413	2.04249	174.715	0.00228665	all	0.337854
CAPZA2	0.185979	2.07901	87.6028	0.00318884	all	0.386651
CAPZB	0.270962	3.47863	188.285	0.00242051	all	0.942575
CARS	0.19958	2.44794	33.017	0.00261384	all	0.488559
CASK	0.337979	4.47033	32.0559	0.00904677	all	1.51088
CASP1	0.318956	3.70753	36.5817	0.00792323	all	1.18254
CASP10	0.329807	4.35815	18.3977	0.0138921	all	1.43735
CASP3	0.19205	2.32731	21.1249	0.00239376	all	0.446959
CASP4	0.312439	4.29449	95.552	0.01491	all	1.34177
CASP6	0.320361	3.7266	11.9677	0.0121892	all	1.19386
CASP7	0.227035	2.82569	21.5217	0.00433558	all	0.641532
CASP9	0.36332	3.95241	9.22649	0.0127891	all	1.43599
CAST	0.242505	2.7082	76.9251	0.00205759	all	0.656752
CAT	0.358286	3.6167	64.1461	0.00489788	all	1.29581
CAV2	0.266765	2.73046	39.4223	0.00894778	all	0.72839
CBFB	0.210189	2.49357	30.934	0.00309807	all	0.524119
CBLL1	0.18952	2.40969	25.4791	0.00243555	all	0.456686
CBR1	0.340716	3.54557	165.075	0.00731746	all	1.20803
CBWD1	0.368302	3.88062	21.1987	0.00921484	all	1.42924
CBWD2	0.311209	3.06723	7.25447	0.00743222	all	0.954551
CBX3	0.235532	2.46078	100.027	0.00339397	all	0.579592
CBY1	0.234625	2.48246	14.0564	0.00787086	all	0.582447
CC2D1B	0.239054	4.46481	27.7983	0.00327317	all	1.06733
CCBL2	0.179046	1.71095	32.173	0.00325792	all	0.30634
CCDC101	0.306544	3.89186	10.6478	0.00956056	all	1.19303
CCDC104	0.305795	3.11147	23.4847	0.00471263	all	0.951473
CCDC109B	0.340203	3.15599	19.2357	0.0215023	all	1.07368
CCDC115	0.325328	3.23412	51.439	0.00686441	all	1.05215
CCDC117	0.239548	3.04842	98.064	0.00421589	all	0.730242
CCDC12	0.194509	2.16806	22.1572	0.00441488	all	0.421708
CCDC127	0.244175	2.70175	9.7433	0.00837895	all	0.6597
CCDC159	0.342204	3.66157	10.2414	0.013342	all	1.253
CCDC174	0.266639	3.76673	8.23508	0.00383585	all	1.00436
CCDC23	0.3441	3.33274	14.2107	0.0230109	all	1.1468
CCDC25	0.218826	2.73258	24.1037	0.00336024	all	0.59796
CCDC28A	0.355282	3.8246	13.8671	0.0123162	all	1.35881
CCDC34	0.342715	3.61404	5.78226	0.0186228	all	1.23858
CCDC43	0.210135	3.2857	13.0231	0.00334251	all	0.69044
CCDC47	0.264994	3.68458	105.764	0.00449652	all	0.976391
CCDC51	0.290522	3.29772	15.5054	0.00691702	all	0.958059
CCDC53	0.355166	3.5872	29.5656	0.00818416	all	1.27405
CCDC58	0.227464	2.22312	29.599	0.00630465	all	0.50568
CCDC59	0.237731	2.50867	47.7161	0.00494015	all	0.596388
CCDC6	0.252084	3.96825	40.125	0.00455563	all	1.00033
CCDC61	0.322797	3.2586	6.71492	0.00894208	all	1.05187
CCDC69	0.344918	4.19487	11.5189	0.0173675	all	1.44688
CCDC71	0.290486	3.47418	16.4244	0.00593267	all	1.0092
CCDC90B	0.354283	4.09813	57.0053	0.00880916	all	1.4519
CCDC94	0.28278	2.68001	18.1985	0.00643563	all	0.757855
CCDC96	0.328085	4.05817	1.89905	0.00934511	all	1.33143
CCNB1IP1	0.347925	4.26047	45.4342	0.0147467	all	1.48233
CCNC	0.1781	2.16145	32.4133	0.00269608	all	0.384955
CCNDBP1	0.335368	3.24846	16.5884	0.0113408	all	1.08943
CCNG1	0.336851	2.98137	30.4758	0.00654963	all	1.00428
CCNG2	0.30281	3.66923	41.5066	0.00830933	all	1.11108
CCNI	0.206598	2.15356	156.243	0.00230353	all	0.44492
CCNK	0.295998	3.74666	15.1015	0.00244285	all	1.10901
CCNY	0.2033	2.26285	21.6152	0.00281557	all	0.460039
CCNYL1	0.274404	3.73859	12.2548	0.0040014	all	1.02588
CCRN4L	0.251652	3.06979	10.9711	0.00673513	all	0.772519
CCS	0.355339	4.37105	27.6316	0.00722644	all	1.5532
CCT2	0.189661	2.11049	109.936	0.00161467	all	0.400278
CCT3	0.232713	2.87233	140.333	0.00162464	all	0.66843
CCT4	0.213992	2.10558	109.456	0.00303282	all	0.450579
CCT5	0.232151	2.48027	133.722	0.00244209	all	0.575797
CCT6A	0.232772	2.77696	155.081	0.00156584	all	0.646399
CCT7	0.227255	2.49203	118.198	0.00210937	all	0.566327
CCT8	0.219097	2.37042	145.481	0.00261138	all	0.519351
CD164	0.178945	2.28084	177.517	0.00182819	all	0.408145
CD2BP2	0.192523	2.16378	29.9494	0.00142621	all	0.416577
CD3EAP	0.322895	5.03773	3.18833	0.0131898	all	1.62666
CD44	0.236937	2.65679	338.011	0.00437944	all	0.629493
CD47	0.273446	3.61747	273.877	0.00412705	all	0.989181
CD58	0.242773	3.28081	25.347	0.00734936	all	0.796491
CD63	0.27267	2.87247	371.009	0.012178	all	0.783235
CD81	0.33233	4.66815	148.348	0.00266559	all	1.55137
CD9	0.245624	2.36429	335.818	0.0045407	all	0.580726
CDC123	0.133413	1.62832	27.0761	0.00205856	all	0.217239
CDC14B	0.29701	4.52515	9.79044	0.0103615	all	1.34402
CDC16	0.291072	3.51142	43.3924	0.00599991	all	1.02208
CDC23	0.254787	3.2259	25.4672	0.00459999	all	0.821916
CDC26	0.170683	1.8731	13.0069	0.00792771	all	0.319707
CDC27	0.257731	3.66719	51.6383	0.00192056	all	0.945147
CDC37	0.275919	3.41975	170.196	0.00293974	all	0.943572
CDC37L1	0.302898	3.0081	11.9369	0.0039856	all	0.911149
CDC42	0.113177	1.60515	497.683	0.00160983	all	0.181666
CDC42SE1	0.208211	2.47805	216.366	0.00179665	all	0.515959
CDC42SE2	0.299133	3.56082	17.481	0.00586937	all	1.06516
CDC5L	0.334732	4.46092	17.212	0.00353866	all	1.49321
CDC73	0.326322	4.44641	20.0535	0.00261679	all	1.45096
CDH1	0.269824	3.6879	106.12	0.00377852	all	0.995084
CDK12	0.239427	5.13928	28.5939	0.00512543	all	1.23048
CDK19	0.309387	5.00262	9.55763	0.00597481	all	1.54774
CDK4	0.322402	4.16666	39.8735	0.00477908	all	1.34334
CDK5RAP1	0.221997	2.94787	21.7268	0.00448817	all	0.654419
CDK7	0.198972	2.21006	36.8635	0.00369126	all	0.439739
CDK8	0.241725	3.01522	6.9539	0.00610859	all	0.728853
CDK9	0.300454	3.73951	37.8539	0.00353727	all	1.12355
CDKN2AIP	0.197246	3.40209	55.5666	0.00313991	all	0.671047
CDKN2AIPNL	0.348575	3.88182	12.9093	0.0144064	all	1.35311
CDPF1	0.287506	2.74063	2.73264	0.00828942	all	0.787948
CDR2	0.332273	4.0608	23.5374	0.00720419	all	1.34929
CDS1	0.239917	2.8205	29.0133	0.0037193	all	0.676687
CDV3	0.207015	2.61283	300.458	0.00258002	all	0.540897
CDYL	0.19506	2.56146	21.7224	0.00270567	all	0.499638
CEBPA-AS1	0.40361	3.82974	0.371381	0.0206778	all	1.54572
CEBPG	0.149586	1.96687	248.81	0.00139825	all	0.294216
CEBPZ	0.264819	4.10855	49.9265	0.00328882	all	1.08802
CECR5	0.32689	4.13485	18.4455	0.00538676	all	1.35164
CELF1	0.264698	5.49824	92.7937	0.00699657	all	1.45537
CENPBD1	0.354557	4.42065	11.7063	0.0134851	all	1.56737
CENPH	0.319926	3.46091	11.6768	0.0109096	all	1.10724
CENPN	0.319764	5.07559	11.5016	0.009189	all	1.62299
CENPQ	0.374082	4.32381	8.35362	0.0198205	all	1.61746
CEP104	0.239498	4.35921	11.0326	0.00495819	all	1.04402
CEP89	0.232005	4.56666	9.5211	0.00467878	all	1.05949
CERK	0.260042	2.69865	24.3659	0.00576593	all	0.701763
CERS2	0.292209	3.90863	26.6502	0.00567209	all	1.14214
CERS3	0.233587	2.97545	188.252	0.00478679	all	0.695027
CERS5	0.238264	2.90671	24.0202	0.00440716	all	0.692565
CES2	0.277856	3.05828	63.0655	0.00218558	all	0.849763
CETN2	0.255119	3.33005	28.0518	0.00605281	all	0.84956
CETN3	0.298703	3.20255	13.7612	0.00968376	all	0.956613
CFL1	0.306996	4.99233	935.29	0.00374518	all	1.53262
CFLAR	0.373978	3.9343	47.5615	0.0034145	all	1.47134
CGGBP1	0.278478	3.5294	105.717	0.00550276	all	0.98286
CGRRF1	0.322711	3.68366	9.56127	0.0174954	all	1.18876
CHAC2	0.277281	4.1926	5.94071	0.0154255	all	1.16253
CHCHD1	0.256059	2.84155	42.3762	0.00791196	all	0.727604
CHCHD3	0.176649	2.45336	23.2361	0.00323438	all	0.433385
CHCHD4	0.197341	2.09045	37.2943	0.00510423	all	0.412532
CHCHD6	0.342369	4.11166	10.0995	0.0159612	all	1.40771
CHD1L	0.257532	3.66743	26.3435	0.00377231	all	0.94448
CHEK2	0.317893	4.17829	11.681	0.0107518	all	1.32825
CHFR	0.295065	4.0225	14.3161	0.00404557	all	1.1869
CHIC2	0.217794	2.35791	67.8479	0.00682067	all	0.51354
CHID1	0.321197	4.94724	34.2817	0.00455388	all	1.58904
CHMP1A	0.296457	4.36099	138.714	0.0019229	all	1.29284
CHMP1B	0.249867	2.70061	273.743	0.00565014	all	0.674793
CHMP2A	0.224606	2.73865	101.696	0.00382242	all	0.615118
CHMP2B	0.180087	2.02459	110.457	0.00314186	all	0.364601
CHMP3	0.172895	2.12851	102.846	0.0020379	all	0.368008
CHMP4B	0.248554	2.98723	137.225	0.00172781	all	0.742487
CHMP4C	0.295444	4.15108	24.6396	0.011616	all	1.22641
CHMP5	0.165261	1.94536	39.7018	0.00274596	all	0.321492
CHMP6	0.280156	3.16065	13.7171	0.00539547	all	0.885474
CHMP7	0.266752	2.47624	12.4276	0.00282873	all	0.660542
CHORDC1	0.318226	3.82763	52.758	0.00484915	all	1.21805
CHP1	0.270928	2.96285	311.763	0.0041105	all	0.802718
CHPF2	0.299835	3.24198	37.7718	0.00269168	all	0.972059
CHRNB1	0.32542	3.2183	3.82219	0.0127285	all	1.0473
CHST15	0.220704	2.38752	8.19016	0.00425755	all	0.526935
CHTF8	0.233298	2.41897	12.6564	0.00421309	all	0.56434
CHTOP	0.298699	4.41206	19.631	0.0046917	all	1.31788
CHUK	0.236113	3.61732	18.0504	0.00367379	all	0.854098
CIAO1	0.187044	3.0057	31.5088	0.00273194	all	0.562199
CIAPIN1	0.196239	2.17583	38.132	0.00181256	all	0.426984
CIDECP	0.281124	3.41417	6.82755	0.0133808	all	0.959807
CINP	0.165184	1.98699	17.4917	0.00271465	all	0.328219
CIR1	0.268514	3.13627	25.7514	0.00564421	all	0.842132
CIRBP	0.304492	4.02292	249.778	0.00670461	all	1.22495
CISD1	0.259969	3.85952	37.692	0.00929574	all	1.00336
CISD2	0.224936	2.74474	46.8736	0.00670358	all	0.617389
CIZ1	0.342945	4.51635	65.7535	0.0031891	all	1.54886
CKAP5	0.291674	5.24336	26.8986	0.00893682	all	1.52935
CLCA2	0.343578	4.25259	326.46	0.00591644	all	1.4611
CLCN3	0.207613	3.075	105.579	0.00193435	all	0.638412
CLDN12	0.222079	2.76808	79.4771	0.00357022	all	0.614732
CLDND1	0.294405	3.43011	191.744	0.00666941	all	1.00984
CLEC16A	0.239938	3.50722	5.32186	0.00339043	all	0.841514
CLIC1	0.293626	3.24479	380.588	0.0095236	all	0.952755
CLINT1	0.220487	3.50468	116.243	0.00363519	all	0.772736
CLIP1	0.261662	4.74905	136.159	0.00589335	all	1.24265
CLK3	0.208198	4.04662	20.7901	0.00341436	all	0.8425
CLN5	0.308221	3.41487	14.4212	0.00435165	all	1.05253
CLN8	0.309356	3.61469	17.275	0.00711583	all	1.11823
CLNS1A	0.223387	2.31167	82.9082	0.00332976	all	0.516399
CLP1	0.199329	2.47287	17.2504	0.00366989	all	0.492913
CLPTM1L	0.259857	3.99	56.217	0.00163598	all	1.03683
CLPX	0.190903	2.81671	80.9952	0.00293682	all	0.537718
CLTA	0.202371	2.43578	64.1706	0.00234468	all	0.492931
CLTB	0.30299	4.32879	340.527	0.00599965	all	1.31158
CLTC	0.225234	3.11536	88.932	0.00240797	all	0.701687
CMAS	0.209764	2.62358	43.7693	0.00287646	all	0.550333
CMC1	0.269169	2.88731	30.9876	0.00771669	all	0.777174
CMC2	0.203371	2.88073	30.7328	0.00741336	all	0.585856
CMPK1	0.172367	1.99069	100.198	0.00263658	all	0.34313
CMSS1	0.249435	3.09735	20.469	0.00673079	all	0.772586
CMTM6	0.272245	3.71517	81.4029	0.00806905	all	1.01144
CNBP	0.182181	2.07665	603.919	0.00190183	all	0.378325
CNDP2	0.30878	4.12886	44.4834	0.00362987	all	1.27491
CNEP1R1	0.214357	2.34906	16.2288	0.00358037	all	0.503536
CNIH	0.264154	4.94013	107.77	0.00605071	all	1.30495
CNIH4	0.188463	2.34631	82.2124	0.00349234	all	0.442193
CNKSR3	0.286279	3.61181	24.945	0.00800226	all	1.03399
CNN3	0.280016	3.06192	107.129	0.00738839	all	0.857384
CNNM2	0.377433	4.06291	4.61385	0.0136728	all	1.53348
CNOT1	0.221407	4.03723	64.1294	0.00301178	all	0.893871
CNOT10	0.299583	4.2547	23.0628	0.0056375	all	1.27464
CNOT11	0.21011	2.44582	45.4592	0.00117199	all	0.513893
CNOT2	0.356752	4.26403	84.4281	0.00199191	all	1.5212
CNOT6	0.235592	3.36041	20.2302	0.00307882	all	0.791686
CNOT7	0.227536	2.71059	106.881	0.00303374	all	0.616757
CNOT8	0.227172	2.65246	40.4062	0.00286577	all	0.602564
CNPPD1	0.27481	3.85248	87.4234	0.00130615	all	1.0587
CNPY3	0.317301	3.52366	18.1118	0.00717408	all	1.11806
CNPY4	0.288462	3.95489	6.92352	0.0134716	all	1.14084
CNTROB	0.299779	4.35831	18.4632	0.00602172	all	1.30653
COA1	0.378543	3.54604	51.8908	0.00455072	all	1.34233
COA3	0.286549	3.40349	24.4548	0.00764676	all	0.975267
COA4	0.267881	2.98079	52.0783	0.00584443	all	0.798495
COG1	0.237055	4.11659	12.5231	0.00423434	all	0.975858
COG2	0.280208	3.94327	18.1299	0.00451489	all	1.10494
COG4	0.280075	4.48188	34.7151	0.00719288	all	1.25526
COG7	0.223187	4.17114	12.0176	0.00446926	all	0.930945
COG8	0.227156	2.77824	12.0703	0.00557723	all	0.631095
COIL	0.213007	3.10137	25.3525	0.00300565	all	0.660614
COL4A3BP	0.296704	5.09508	19.1574	0.00414604	all	1.51173
COMMD1	0.245342	2.8271	20.414	0.0119644	all	0.693607
COMMD10	0.368192	3.66467	24.9151	0.00767681	all	1.3493
COMMD2	0.246657	2.60788	51.7746	0.00339409	all	0.643252
COMMD3	0.35749	4.27564	11.7982	0.0132513	all	1.5285
COMMD4	0.350036	3.91737	19.3143	0.00845472	all	1.37122
COMMD5	0.278314	3.99178	26.8517	0.0050914	all	1.11097
COMMD6	0.387477	3.94524	76.4426	0.0231055	all	1.52869
COMMD7	0.27304	3.38106	47.0044	0.00331032	all	0.923165
COMMD8	0.244059	3.86228	26.2352	0.00874144	all	0.942625
COMMD9	0.199727	2.17492	18.2611	0.00384329	all	0.43439
COPA	0.217613	3.2189	78.7194	0.00273979	all	0.700475
COPB1	0.194258	2.46719	68.619	0.00207365	all	0.47927
COPB2	0.170588	2.13549	42.4798	0.00128578	all	0.364288
COPG1	0.230182	2.5392	54.6561	0.00194234	all	0.584478
COPG2	0.252333	3.18976	36.1204	0.00587804	all	0.804883
COPRS	0.198406	2.42577	32.5126	0.0078763	all	0.481286
COPS2	0.147309	1.82805	69.6354	0.0019405	all	0.269288
COPS3	0.198642	2.07536	69.9049	0.00340695	all	0.412254
COPS4	0.147779	1.64249	34.8602	0.00271895	all	0.242725
COPS5	0.200695	2.01009	67.0097	0.00331307	all	0.403415
COPS7A	0.261052	3.19652	50.438	0.00142514	all	0.834459
COPS7B	0.311075	4.35694	13.3419	0.00752996	all	1.35534
COPS8	0.194865	2.12866	24.5672	0.00404674	all	0.414802
COPZ1	0.182073	2.27392	164.741	0.00225545	all	0.414018
COPZ2	0.289171	5.09777	22.2862	0.0157853	all	1.47413
COQ10B	0.256421	2.32271	38.734	0.00695398	all	0.595591
COQ2	0.189903	2.00111	21.8318	0.00582393	all	0.380016
COQ3	0.273433	2.74152	16.6327	0.00623141	all	0.74962
COQ4	0.336497	3.38897	22.2196	0.0107435	all	1.14038
COQ5	0.26345	2.5561	25.2506	0.00807462	all	0.673405
COQ7	0.29395	4.72526	16.7408	0.00853519	all	1.38899
COQ9	0.287496	2.75482	21.1514	0.00832499	all	0.792
CORO1C	0.210947	2.99661	227.711	0.00360388	all	0.632125
CORO2A	0.30576	2.89989	13.2781	0.00894981	all	0.88667
COX10	0.218927	2.103	9.24345	0.00402844	all	0.460403
COX11	0.232733	2.49011	21.9624	0.00329749	all	0.579531
COX15	0.312282	3.76068	26.666	0.00650254	all	1.17439
COX16	0.204515	2.05133	42.1049	0.00955323	all	0.419528
COX17	0.296105	3.41187	35.501	0.0133596	all	1.01027
COX18	0.286129	3.82227	25.7794	0.0107981	all	1.09366
COX6A1	0.329542	2.98462	42.2075	0.0200479	all	0.98356
COX6B1	0.296575	2.92684	305.516	0.0107043	all	0.868028
COX6C	0.311787	2.88793	149.37	0.0105708	all	0.90042
COX7A2L	0.233742	2.62389	30.1437	0.00808468	all	0.613314
COX7B	0.358731	3.48086	51.5355	0.0163123	all	1.24869
COX7C	0.387814	3.51333	350.53	0.0195108	all	1.36252
CPEB4	0.310189	3.71201	24.3816	0.00638446	all	1.15142
CPM	0.339023	3.37148	63.5881	0.00419932	all	1.14301
CPNE1	0.329356	3.23481	43.2924	0.00624629	all	1.0654
CPNE2	0.319915	4.23001	13.1729	0.00732364	all	1.35324
CPNE3	0.277563	3.55314	35.9868	0.00420293	all	0.986221
CPOX	0.257202	3.4999	16.7273	0.00640273	all	0.900183
CPPED1	0.230886	2.39418	10.6146	0.00540868	all	0.552782
CPSF2	0.215629	3.29704	28.4641	0.0029847	all	0.710938
CPSF3	0.237277	2.69586	34.9365	0.00313535	all	0.639664
CPSF3L	0.340234	4.00481	63.8868	0.00368194	all	1.36257
CPSF4	0.304114	4.92311	31.3856	0.00496626	all	1.49719
CPT1A	0.322539	4.97972	15.905	0.0118178	all	1.60615
CRADD	0.251247	2.44884	4.98101	0.00794059	all	0.615264
CRCP	0.295037	4.77088	7.55775	0.00650553	all	1.40758
CREB3	0.250468	2.59075	15.398	0.00521039	all	0.648901
CREB3L2	0.313201	3.92208	9.54483	0.00801967	all	1.2284
CREBL2	0.368387	4.37689	28.1194	0.00753797	all	1.61239
CREM	0.209976	2.3107	7.74104	0.00623695	all	0.485193
CRIPT	0.240349	2.58325	14.7482	0.00761518	all	0.620881
CRK	0.186728	1.97957	192.068	0.00131677	all	0.36964
CRKL	0.231393	2.43093	108.484	0.00291213	all	0.5625
CRLF3	0.309924	2.93933	16.6592	0.00250907	all	0.910971
CRLS1	0.252411	3.28954	59.0198	0.00550547	all	0.830315
CRNDE	0.350986	4.13777	32.4105	0.0156451	all	1.4523
CRNKL1	0.348868	4.13106	10.2835	0.00298361	all	1.44119
CRTAP	0.25174	2.74175	64.3771	0.0046294	all	0.690209
CRTC3	0.293848	3.37041	30.3783	0.00612315	all	0.99039
CRYBB2P1	0.329689	3.90403	9.47698	0.00687946	all	1.28711
CRYL1	0.355157	4.20931	17.9736	0.017807	all	1.49497
CSDE1	0.206774	2.27575	345.586	0.00181285	all	0.470567
CSE1L	0.22676	3.10721	60.3706	0.0029715	all	0.704593
CSGALNACT2	0.273953	3.1318	21.5913	0.00599655	all	0.857967
CSNK1A1	0.18924	2.24572	277.266	0.00254062	all	0.42498
CSNK1E	0.322167	3.36685	85.157	0.00589168	all	1.08469
CSNK1G1	0.232056	4.63237	8.60617	0.00415183	all	1.07497
CSNK1G3	0.287478	3.42768	9.96627	0.003501	all	0.985384
CSNK2A1	0.16615	2.19982	41.263	0.00140331	all	0.365501
CSNK2A2	0.313232	3.96539	208.253	0.00591877	all	1.24209
CSNK2B	0.217391	2.33406	35.3712	0.00509951	all	0.507404
CSRNP2	0.252819	3.61388	92.092	0.00434101	all	0.913656
CSRP1	0.351348	3.95182	77.2475	0.00632279	all	1.38846
CSRP2BP	0.289262	5.12092	6.67608	0.00570769	all	1.48129
CSTF1	0.188994	2.80351	29.9569	0.00272364	all	0.529847
CSTF2	0.239924	2.71677	20.9682	0.00364226	all	0.651819
CSTF2T	0.253943	3.24207	14.7461	0.00475448	all	0.8233
CSTF3	0.267602	4.3231	17.5241	0.00524532	all	1.15687
CTA-217C2.1	0.297252	2.87445	13.2605	0.0125252	all	0.854435
CTB-131K11.1	0.2245	3.86412	22.8437	0.00440139	all	0.867494
CTB-175E5.7	0.259005	3.67978	1.69154	0.00325481	all	0.953079
CTBP2	0.197668	2.42199	41.5472	0.00277407	all	0.47875
CTBS	0.300125	3.33235	23.1506	0.00841412	all	1.00012
CTCF	0.230617	3.51575	20.7351	0.00324458	all	0.810791
CTD-2003C8.1	0.321492	3.70112	27.0465	0.0166447	all	1.18988
CTD-2037K23.2	0.345096	4.12065	4.49297	0.0172534	all	1.42202
CTD-2119F7.2	0.184151	2.36394	5.04934	0.00801906	all	0.435322
CTD-2260A17.2	0.30402	3.22212	5.67029	0.0149675	all	0.979587
CTD-2336O2.1	0.255922	2.83883	25.8353	0.00762595	all	0.726519
CTD-2369P2.2	0.355933	4.50806	24.436	0.0186704	all	1.60457
CTD-2382E5.3	0.273621	3.3925	12.0913	0.0107877	all	0.92826
CTD-2410N18.3	0.339488	3.71347	1.4029	0.0152427	all	1.26068
CTD-2562J17.7	0.296422	3.44846	16.6019	0.0168431	all	1.0222
CTD-3116E22.4	0.335101	3.87622	3.2026	0.0163783	all	1.29893
CTDP1	0.32534	3.73108	14.9911	0.00356437	all	1.21387
CTDSP1	0.281812	3.13658	177.888	0.00378244	all	0.883926
CTDSP2	0.331689	4.37882	408.179	0.00567686	all	1.4524
CTNNA1	0.227523	3.50124	100.904	0.00284967	all	0.796612
CTNNB1	0.328397	3.69746	185.245	0.00496829	all	1.21424
CTNNBIP1	0.225462	2.29345	122.549	0.00203998	all	0.517087
CTNNBL1	0.155672	2.03927	30.3616	0.00197977	all	0.317456
CTNND1	0.246748	4.49114	76.6503	0.00361323	all	1.10818
CTNS	0.237256	2.4817	15.9729	0.00387357	all	0.588798
CTPS1	0.342555	4.19355	35.8232	0.00398389	all	1.43652
CTR9	0.229585	3.84153	33.2198	0.00460491	all	0.881957
CTSA	0.263049	3.4184	89.4018	0.00204318	all	0.899207
CTSB	0.313701	4.11419	524.107	0.00505959	all	1.29063
CTSC	0.277332	3.13823	189.297	0.00795084	all	0.870331
CTSH	0.319054	4.68503	137.986	0.0148054	all	1.49478
CTTN	0.203811	2.90755	144.79	0.00216109	all	0.592591
CTTNBP2NL	0.263437	2.69396	101.13	0.00289637	all	0.709687
CTU2	0.337753	4.78433	8.96594	0.00720379	all	1.61592
CUEDC2	0.299899	3.86027	29.0284	0.00549108	all	1.15769
CUL1	0.143697	2.70791	58.2934	0.00140812	all	0.389117
CUL2	0.184892	3.215	19.6593	0.00235286	all	0.594426
CUL3	0.231359	2.79721	101.624	0.00314004	all	0.64716
CUL4B	0.213556	3.49776	47.806	0.00259558	all	0.746967
CUTA	0.304907	3.94363	142.291	0.0116447	all	1.20244
CUTC	0.233915	2.80108	20.019	0.00494998	all	0.655215
CUX1	0.354459	4.12065	34.8708	0.00833337	all	1.4606
CWC15	0.23971	2.84223	33.1394	0.00668731	all	0.681311
CWC22	0.279314	4.10648	25.7307	0.00293859	all	1.147
CWC25	0.226631	4.57055	31.5474	0.00569461	all	1.03583
CWC27	0.252708	2.45303	12.0428	0.00525329	all	0.619903
CWF19L1	0.257508	4.4028	18.5876	0.00542011	all	1.13376
CWH43	0.229474	2.56583	56.671	0.00502783	all	0.588792
CXorf24	0.268524	3.45477	3.4479	0.0128785	all	0.927686
CXorf38	0.271142	4.35354	15.7546	0.00702228	all	1.18043
CXorf40A	0.238739	2.49307	5.44357	0.00449578	all	0.595194
CXorf40B	0.269313	3.58144	30.2544	0.00436357	all	0.964529
CXorf56	0.21054	3.27777	29.3704	0.00450172	all	0.690102
CXXC1	0.355868	4.41885	48.5281	0.00612004	all	1.57253
CYB561	0.260919	3.47055	167.641	0.0018974	all	0.905534
CYB561A3	0.306375	3.7653	18.7023	0.0100675	all	1.15359
CYB561D1	0.353399	3.8061	17.6339	0.00969808	all	1.34507
CYB561D2	0.314468	3.11581	7.5085	0.0121154	all	0.979822
CYB5B	0.191515	2.96287	95.5845	0.00434954	all	0.567434
CYB5D1	0.290327	4.80117	11.2582	0.00910753	all	1.39391
CYB5D2	0.297944	4.87676	23.3325	0.0109371	all	1.453
CYB5R4	0.242599	2.78082	21.0187	0.0077933	all	0.674623
CYCS	0.273304	5.01661	575.03	0.00495757	all	1.37106
CYFIP1	0.129174	2.03122	36.4129	0.00102851	all	0.262381
CYTH1	0.239487	4.03512	27.8856	0.00350165	all	0.96636
CYTH2	0.240547	2.73579	10.5395	0.00203687	all	0.658085
CYTH3	0.265585	5.85949	22.7514	0.00611314	all	1.55619
DAD1	0.301907	3.61222	226.379	0.00973658	all	1.09055
DAGLB	0.295125	4.17809	22.656	0.00560068	all	1.23306
DALRD3	0.230342	2.80267	14.2143	0.00477131	all	0.645573
DANCR	0.28063	2.66322	75.7179	0.00703164	all	0.747378
DAP3	0.162516	1.9086	55.8767	0.00223278	all	0.310179
DAPP1	0.313809	3.879	12.116	0.0101239	all	1.21727
DARS	0.138646	1.94349	65.0647	0.00135125	all	0.269458
DAXX	0.311902	4.18231	57.8276	0.00186997	all	1.30447
DAZAP2	0.292879	3.07841	165.478	0.00457738	all	0.901604
DBF4	0.310827	4.36933	13.0632	0.00856063	all	1.3581
DBI	0.290942	3.4869	323.502	0.0100142	all	1.01448
DBNL	0.194033	2.14881	23.2485	0.00220606	all	0.416941
DBR1	0.262323	4.49053	14.551	0.0061832	all	1.17797
DCAF11	0.249218	3.06602	24.7987	0.00425593	all	0.764108
DCAF12	0.244462	2.54644	32.7874	0.00235	all	0.622506
DCAF13	0.286052	3.02574	16.7936	0.00537198	all	0.865519
DCAF17	0.253255	5.4566	6.49711	0.00562946	all	1.38191
DCAF5	0.214373	3.78085	29.0188	0.00233526	all	0.810511
DCAF6	0.311502	4.05045	36.3971	0.00412395	all	1.26172
DCAF7	0.322583	4.44761	141.267	0.0055431	all	1.43472
DCAKD	0.340769	4.26899	41.6071	0.0147549	all	1.45474
DCBLD1	0.320461	3.61334	8.74889	0.0152942	all	1.15793
DCK	0.283867	3.22906	18.9696	0.00782719	all	0.916623
DCLRE1B	0.295934	2.84223	9.23794	0.00550512	all	0.841115
DCP1A	0.255978	5.16027	59.0563	0.00527197	all	1.32091
DCP1B	0.300022	3.45808	6.32462	0.0121618	all	1.0375
DCTD	0.245808	2.60859	185.518	0.00316483	all	0.641212
DCTN1	0.262981	3.79658	45.7581	0.00463726	all	0.998427
DCTN2	0.153065	2.04077	135.641	0.00135438	all	0.312371
DCTN3	0.179523	2.20329	43.5347	0.002879	all	0.395541
DCTN4	0.192672	2.54699	101.197	0.00174301	all	0.490734
DCTN5	0.141298	1.77942	39.3678	0.00150606	all	0.251429
DCTN6	0.229781	2.75785	63.9074	0.00868536	all	0.633701
DCUN1D1	0.332242	3.72521	166.896	0.00237489	all	1.23767
DCUN1D3	0.287828	3.59043	20.0132	0.0101445	all	1.03343
DCUN1D5	0.250653	3.41577	45.0331	0.00587685	all	0.856174
DDA1	0.289857	4.0329	59.8844	0.00179979	all	1.16896
DDB1	0.274888	3.38494	114.115	0.00526638	all	0.930478
DDB2	0.242626	2.78007	38.9487	0.00422787	all	0.674518
DDI2	0.306826	5.05195	15.9535	0.00696664	all	1.55007
DDOST	0.181532	2.05936	83.7848	0.00168582	all	0.373841
DDRGK1	0.235029	2.71736	41.4512	0.00385713	all	0.638659
DDX1	0.194307	2.67987	74.3933	0.00218962	all	0.520719
DDX18	0.202208	3.31328	23.3577	0.00204335	all	0.669972
DDX19A	0.220118	2.74015	10.6508	0.00384403	all	0.603158
DDX19B	0.205708	2.34762	13.2775	0.00461302	all	0.482926
DDX20	0.245295	3.60442	13.2352	0.00460359	all	0.884146
DDX21	0.285928	5.09901	107.662	0.00626335	all	1.45795
DDX23	0.218786	3.44667	68.5494	0.00215541	all	0.754083
DDX24	0.271715	4.73211	84.8401	0.00464782	all	1.28578
DDX27	0.243163	3.37274	11.6457	0.00327525	all	0.820125
DDX28	0.321969	4.16531	11.1155	0.00574149	all	1.3411
DDX31	0.249795	3.42861	9.77611	0.00401558	all	0.85645
DDX3X	0.243552	3.98476	353.365	0.0039101	all	0.970497
DDX41	0.308853	4.00355	53.6316	0.00310463	all	1.23651
DDX46	0.2727	5.61569	25.1389	0.00495703	all	1.5314
DDX49	0.317205	4.62945	33.1469	0.00381091	all	1.46848
DDX5	0.216329	4.80608	677.039	0.00430371	all	1.0397
DDX50	0.218302	2.26667	36.4583	0.00262505	all	0.494818
DDX52	0.210622	3.31148	17.8503	0.00341921	all	0.697471
DDX55	0.282172	5.21405	12.4987	0.0074321	all	1.47126
DDX56	0.309738	3.44196	72.416	0.00372166	all	1.06611
DEAF1	0.272933	3.20367	23.8414	0.00352302	all	0.874387
DECR1	0.281273	3.16445	91.4146	0.00751804	all	0.890075
DEDD	0.20148	2.32981	56.2587	0.00203241	all	0.469412
DEDD2	0.297866	4.36193	49.8374	0.00320314	all	1.29927
DEF8	0.222214	2.12341	22.1151	0.00391054	all	0.471851
DENND1A	0.311646	3.19467	4.99981	0.00680326	all	0.995606
DENND2D	0.245638	2.72575	36.4923	0.00726924	all	0.669548
DENND5A	0.330765	4.29207	26.2085	0.0057257	all	1.41966
DENND6A	0.282134	5.32606	16.1155	0.00521328	all	1.50266
DENR	0.157717	2.16688	80.9151	0.00122508	all	0.341753
DERA	0.265927	3.13781	44.1239	0.00955494	all	0.834426
DERL1	0.249496	2.95644	52.9706	0.00305521	all	0.737619
DERL2	0.159123	1.93213	36.3064	0.0028476	all	0.307447
DESI1	0.31987	4.18752	24.5968	0.00449031	all	1.33946
DESI2	0.219413	2.76639	36.3378	0.00258715	all	0.606984
DFFA	0.244427	2.64198	12.3405	0.00418922	all	0.645772
DGCR14	0.285621	3.49833	19.752	0.00287519	all	0.999195
DGUOK	0.23604	2.69528	30.71	0.00851089	all	0.636196
DGUOK-AS1	0.323065	2.9664	11.4073	0.0203968	all	0.95834
DHDDS	0.223373	3.18651	31.2537	0.00375938	all	0.711779
DHPS	0.269593	2.74171	39.7955	0.00527085	all	0.739146
DHRS1	0.321545	3.67592	42.5574	0.00548649	all	1.18198
DHRS3	0.356014	4.35085	32.5896	0.0181257	all	1.54896
DHRS4	0.238998	2.40918	17.7198	0.00499553	all	0.575789
DHRS4-AS1	0.325583	3.82449	7.43275	0.0141129	all	1.24519
DHRS4L2	0.341964	4.23134	28.8391	0.0100408	all	1.44697
DHRS7	0.340118	4.50729	30.627	0.019532	all	1.53301
DHRS7B	0.3416	3.88507	20.3418	0.0132276	all	1.32714
DHX15	0.24782	4.17134	133.596	0.00238559	all	1.03374
DHX16	0.285981	5.29353	27.8803	0.00463329	all	1.51385
DHX29	0.281293	4.06822	25.9318	0.00312733	all	1.14436
DHX30	0.307454	4.32215	26.6431	0.00466191	all	1.32886
DHX32	0.223289	2.76475	38.8823	0.00292388	all	0.617339
DHX38	0.253722	4.35013	28.7094	0.00445134	all	1.10372
DHX57	0.265845	5.37524	9.43618	0.00464661	all	1.42898
DHX8	0.217862	4.00798	15.1526	0.0024328	all	0.873185
DHX9	0.256162	5.33928	66.2978	0.00563078	all	1.36772
DIABLO	0.379682	3.06652	3.78462	0.011189	all	1.1643
DIAPH1	0.35842	4.35899	61.2169	0.00497951	all	1.56235
DIDO1	0.250369	5.56949	15.7193	0.00509554	all	1.39442
DIMT1	0.192803	2.12696	22.2605	0.0029487	all	0.410086
DIRC2	0.336097	3.61259	16.0753	0.00507354	all	1.21418
DIS3	0.262421	3.85163	35.342	0.0021041	all	1.01075
DIS3L2	0.305027	5.22162	7.13528	0.00653177	all	1.59274
DKC1	0.279797	3.07179	67.863	0.002565	all	0.859478
DLAT	0.261709	3.38758	35.9426	0.00553037	all	0.886559
DLD	0.280906	3.82123	66.0206	0.0057622	all	1.0734
DLEU1	0.377554	4.08455	6.65652	0.00917313	all	1.54214
DLG3	0.269591	4.0133	5.38993	0.00522273	all	1.08195
DLST	0.232766	2.99289	52.7185	0.00209513	all	0.696644
DMKN	0.287301	2.80736	1917.73	0.00589275	all	0.806557
DNAAF2	0.211693	2.28564	6.66194	0.00381488	all	0.483854
DNAJA1	0.314967	4.06468	68.8212	0.00896387	all	1.28024
DNAJA2	0.198231	2.80528	57.5925	0.00191436	all	0.556095
DNAJA3	0.35887	3.80513	15.4626	0.00914905	all	1.36555
DNAJB1	0.28291	3.71652	326.833	0.0035684	all	1.05144
DNAJB11	0.201584	2.23704	58.9858	0.00135257	all	0.450951
DNAJB12	0.202098	2.36634	18.6687	0.00288813	all	0.478231
DNAJB6	0.199373	2.22169	56.0713	0.003366	all	0.442946
DNAJB9	0.305103	3.65634	18.2716	0.0164791	all	1.11556
DNAJC10	0.270365	3.57081	46.1382	0.00222041	all	0.965425
DNAJC11	0.247961	3.6936	29.5784	0.00366747	all	0.915869
DNAJC14	0.24628	3.91012	8.75155	0.00515883	all	0.962984
DNAJC16	0.23876	4.32855	12.4488	0.00438914	all	1.03348
DNAJC17	0.182133	2.15171	9.07517	0.00578506	all	0.391898
DNAJC19	0.315522	3.17269	16.387	0.00654305	all	1.00105
DNAJC2	0.279445	4.58976	14.3226	0.00478147	all	1.28258
DNAJC21	0.280187	3.77465	8.80201	0.00259752	all	1.05761
DNAJC25	0.222889	2.56299	6.93899	0.00662792	all	0.571263
DNAJC3	0.327381	3.26802	23.3766	0.00368755	all	1.06989
DNAJC30	0.333174	4.11603	9.94409	0.0124774	all	1.37136
DNAJC7	0.127955	1.91138	38.7571	0.00130379	all	0.24457
DNAJC8	0.17544	1.86786	58.5394	0.0019247	all	0.327696
DNAJC9	0.290265	4.26183	10.7038	0.0116111	all	1.23706
DNAL4	0.369184	4.07454	8.30327	0.0158159	all	1.50425
DNASE1L1	0.325315	4.189	3.28524	0.0112214	all	1.36275
DNASE2	0.384836	4.09095	18.9334	0.0155048	all	1.57435
DNM1L	0.224939	3.493	33.0825	0.00184482	all	0.78571
DNM2	0.276169	2.97837	57.8239	0.00237371	all	0.822534
DNPEP	0.312467	4.3516	74.6923	0.00300006	all	1.35973
DNTTIP1	0.20803	2.54487	15.9341	0.00364477	all	0.529409
DNTTIP2	0.162704	2.38326	43.6317	0.00191065	all	0.387767
DOK4	0.281469	2.86868	30.3095	0.00492323	all	0.807445
DOLK	0.205862	2.45452	12.653	0.00307368	all	0.505291
DOLPP1	0.293404	3.74632	6.38291	0.00399558	all	1.09918
DOM3Z	0.327579	4.95942	14.6453	0.0105517	all	1.6246
DPCD	0.319071	4.10284	17.0077	0.0246494	all	1.3091
DPF2	0.29507	3.28824	14.8778	0.00224431	all	0.970261
DPH1	0.350905	4.08026	8.67472	0.00824546	all	1.43179
DPH3	0.168907	1.90767	50.3506	0.00471035	all	0.322219
DPH5	0.322637	3.35676	6.53692	0.00935366	all	1.08302
DPM1	0.187044	2.21473	58.4314	0.00372748	all	0.414252
DPY19L1	0.289905	4.50483	9.23384	0.00743079	all	1.30597
DPY30	0.257992	2.93408	27.6259	0.00828663	all	0.75697
DR1	0.201532	2.62241	76.9621	0.00315057	all	0.528499
DRAM1	0.369018	3.67819	6.24517	0.025774	all	1.35732
DRAM2	0.274689	3.22546	62.1624	0.00779207	all	0.885999
DRG1	0.130274	1.63693	58.6059	0.00250817	all	0.21325
DRG2	0.172421	2.17569	11.5863	0.00173549	all	0.375134
DSCR3	0.174149	2.11523	22.0626	0.00212015	all	0.368365
DSE	0.307466	3.1862	17.2659	0.00363657	all	0.979651
DSTN	0.143219	1.67085	866.42	0.00265971	all	0.239298
DSTNP2	0.344054	4.11332	9.20572	0.0179048	all	1.41521
DTD1	0.270604	2.84325	20.8676	0.00656475	all	0.769394
DTD2	0.204797	2.28126	21.7335	0.0033487	all	0.467195
DTNB	0.328364	3.6225	7.55942	0.0114403	all	1.1895
DTNBP1	0.357924	3.52466	10.7598	0.0129273	all	1.26156
DUS2L	0.218556	2.67468	6.03707	0.00413429	all	0.584566
DUS4L	0.30311	3.84962	9.43353	0.0105163	all	1.16686
DUSP11	0.154005	1.68177	38.0499	0.00311526	all	0.259
DUSP12	0.235668	2.40499	25.5882	0.00585097	all	0.566778
DUSP18	0.299043	2.96163	9.36399	0.0109813	all	0.885655
DUSP22	0.201639	2.37044	77.9624	0.00420241	all	0.477973
DUSP3	0.169057	1.95274	63.9856	0.00218395	all	0.330125
DUSP5	0.315785	3.30582	51.2441	0.0145902	all	1.04393
DUT	0.359031	3.57053	96.596	0.00898976	all	1.28193
DVL2	0.309741	3.55557	20.5283	0.00417836	all	1.1013
DYM	0.280626	2.68899	33.091	0.00362507	all	0.7546
DYNC1I2	0.210358	2.58551	48.447	0.00247668	all	0.543882
DYNC1LI1	0.251096	2.61476	33.9176	0.00198752	all	0.656556
DYNLL1	0.286713	3.07793	366.805	0.00531922	all	0.882484
DYNLRB1	0.234964	2.79608	69.4004	0.00519337	all	0.656978
DYNLT1	0.334289	3.40251	57.0429	0.0100277	all	1.13742
DYNLT3	0.330863	4.30456	64.992	0.0125616	all	1.42422
DYRK4	0.223603	2.33902	6.41335	0.00854824	all	0.523011
E2F4	0.338138	4.79995	40.2089	0.00385648	all	1.62304
E2F6	0.283251	3.90846	17.8538	0.00653187	all	1.10708
EAF1	0.277004	2.99292	13.1981	0.0053784	all	0.829052
EAPP	0.241983	2.58774	44.5006	0.00610597	all	0.626189
EARS2	0.22764	2.74891	17.5532	0.00415491	all	0.625763
EBAG9	0.262454	3.22156	53.4842	0.00774666	all	0.845513
EBNA1BP2	0.281211	3.31523	76.3509	0.00367711	all	0.93228
EBPL	0.218839	2.48687	43.2609	0.00734662	all	0.544224
ECD	0.187531	2.38144	23.9721	0.00206505	all	0.446594
ECHDC1	0.36074	3.62647	177.74	0.0144589	all	1.30821
ECHS1	0.291466	3.61749	74.0547	0.00503532	all	1.05438
ECI2	0.361333	4.35062	5.85671	0.0189771	all	1.57202
EDC3	0.301275	3.20908	24.2936	0.00380507	all	0.966817
EDEM1	0.212992	2.97806	33.9854	0.00266336	all	0.634303
EDEM2	0.20935	2.34727	13.424	0.00358434	all	0.491401
EDF1	0.259353	2.79048	224.739	0.00795308	all	0.72372
EEF1A1	0.312401	3.41131	5703.54	0.0107241	all	1.06569
EEF1B2	0.289247	2.87838	574.462	0.0133931	selected	0.832563
EEF1D	0.258975	3.09536	208.342	0.002995	selected	0.801623
EEF1E1	0.291693	4.19992	6.67576	0.0147471	all	1.22509
EEF2	0.295497	3.44605	1011.73	0.00710619	all	1.0183
EEPD1	0.230278	3.75996	8.95834	0.00633176	all	0.865835
EFCAB14	0.185963	2.3507	63.8212	0.00176086	all	0.437144
EFNA3	0.356821	4.15843	25.1524	0.00857296	all	1.48382
EFR3A	0.265369	3.87278	36.5461	0.00378982	all	1.02771
EFTUD1	0.242138	2.49043	13.9621	0.00397008	all	0.60303
EFTUD2	0.264065	2.89396	51.3362	0.00239054	all	0.764195
EGFR	0.309605	5.13745	152.998	0.00672692	all	1.59058
EGLN1	0.273408	3.63583	283.351	0.00626253	all	0.994064
EHD4	0.320317	4.6548	25.4702	0.00536952	all	1.49101
EHF	0.321394	3.78255	266.629	0.00915745	all	1.21569
EHHADH	0.28234	3.5362	9.82886	0.00904837	all	0.998413
EHMT1	0.264356	5.37501	10.1854	0.00444918	all	1.42092
EI24	0.310356	4.15863	112.197	0.0044281	all	1.29066
EID1	0.344789	3.52164	149.447	0.012361	all	1.21422
EID2	0.216439	2.79586	11.3843	0.00359552	all	0.605132
EIF1	0.29874	4.40899	586.266	0.00187692	all	1.31714
EIF1AD	0.242526	2.4662	64.9265	0.00270859	all	0.598117
EIF1AX	0.258478	2.53855	69.8155	0.00450205	all	0.656159
EIF1B	0.315266	3.66359	30.6047	0.00830356	all	1.15501
EIF2A	0.220209	2.24142	63.7231	0.00229948	all	0.49358
EIF2AK1	0.305786	3.58328	89.1369	0.00354421	all	1.09572
EIF2AK4	0.315218	4.07863	16.4622	0.00572962	all	1.28566
EIF2B1	0.220021	2.51895	42.9558	0.00267621	all	0.554222
EIF2B2	0.212564	2.14549	20.1489	0.00475327	all	0.456054
EIF2B3	0.199068	2.73303	27.2017	0.00464876	all	0.544058
EIF2B4	0.190794	2.27015	25.3959	0.00212079	all	0.433133
EIF2B5	0.24291	3.72572	28.3664	0.00333891	all	0.905015
EIF2D	0.220395	2.25892	38.2105	0.00456354	all	0.497855
EIF2S1	0.181565	2.59659	43.2326	0.00226485	all	0.47145
EIF2S2	0.148623	1.77051	75.2521	0.00225927	all	0.263138
EIF2S3	0.229182	2.36807	82.6941	0.00291576	all	0.542719
EIF3B	0.320352	3.86032	143.885	0.00357457	all	1.23666
EIF3C	0.278901	2.44061	7.54036	0.00560243	all	0.68069
EIF3D	0.137765	1.79384	171.46	0.0018581	all	0.247129
EIF3E	0.262629	2.89526	314.461	0.00740761	all	0.76038
EIF3F	0.197148	2.05278	35.6784	0.00290765	all	0.404701
EIF3G	0.196378	2.47851	138.012	0.0024018	all	0.486724
EIF3H	0.235718	2.40528	204.268	0.00713232	all	0.566968
EIF3I	0.216584	2.60113	193.53	0.00427545	all	0.563362
EIF3J	0.15375	2.1398	45.7251	0.00158086	all	0.328994
EIF3K	0.262015	2.69421	210.678	0.008388	all	0.705922
EIF3M	0.116499	1.63307	38.9513	0.00199418	all	0.190252
EIF4A3	0.23887	2.45749	102.755	0.00206012	all	0.587021
EIF4E	0.135316	1.62099	50.114	0.00210678	all	0.219346
EIF4E2	0.117466	1.70601	15.778	0.00168409	all	0.200399
EIF4EBP2	0.214031	2.68517	51.9721	0.00288062	all	0.57471
EIF4ENIF1	0.244173	4.09716	9.07622	0.00413886	all	1.00041
EIF4G2	0.255782	2.77407	583.506	0.00220365	all	0.709558
EIF4G3	0.251229	4.75101	24.0917	0.00615031	all	1.19359
EIF4H	0.22664	2.93357	365.212	0.00214831	all	0.664865
EIF5	0.197162	2.9348	72.6716	0.00195015	all	0.578631
EIF5A2	0.400416	4.03307	31.2476	0.0139428	all	1.6149
EIF5B	0.317723	4.57127	40.4373	0.00873161	all	1.4524
EIF6	0.332593	4.79092	173.77	0.00593013	all	1.59343
ELAC1	0.301826	3.32541	4.06852	0.00802294	all	1.0037
ELAC2	0.250034	3.01256	37.0518	0.00361503	all	0.753243
ELAVL1	0.301461	3.66637	84.3477	0.00222421	all	1.10527
ELF1	0.226955	3.32105	46.2852	0.00259848	all	0.75373
ELK1	0.312309	5.14717	32.9924	0.00293124	all	1.60751
ELK3	0.311072	4.3395	97.9059	0.00502192	all	1.3499
ELL2	0.298759	2.87293	73.2845	0.00514844	all	0.858314
ELMO2	0.263316	4.30573	33.4144	0.00480849	all	1.13377
ELMO3	0.339955	4.00257	23.8502	0.00637883	all	1.36069
ELMOD2	0.348207	3.9516	16.2686	0.00488718	all	1.37598
ELMSAN1	0.292971	5.41564	48.6386	0.00808205	all	1.58663
ELOF1	0.256088	3.9958	38.0118	0.00399713	all	1.02328
ELOVL6	0.332471	4.79852	101.395	0.00863526	all	1.59537
ELOVL7	0.333625	3.95049	65.0797	0.0112167	all	1.31798
ELP3	0.268407	2.84082	12.2323	0.0033967	all	0.762496
ELP4	0.301124	2.81915	12.3638	0.00422347	all	0.848916
ELP5	0.230327	2.68867	13.754	0.00298187	all	0.619274
ELP6	0.268381	2.97449	17.5849	0.00643653	all	0.798295
EMC1	0.301291	4.95886	19.049	0.00964297	all	1.49406
EMC2	0.328303	3.30533	16.7171	0.00390452	all	1.08515
EMC3	0.238291	2.85289	35.1737	0.00540413	all	0.67982
EMC4	0.165544	1.93164	89.819	0.00239939	all	0.319772
EMC7	0.208529	2.36602	84.7054	0.00368513	all	0.493384
EMC8	0.193374	2.13441	10.0423	0.0029394	all	0.412738
EMG1	0.173638	2.05507	4.83875	0.00755222	all	0.356837
EMP1	0.290773	4.20282	446.631	0.0109148	all	1.22207
EMP2	0.360266	4.0149	112.813	0.0140148	all	1.44643
ENDOD1	0.24701	4.01714	48.5937	0.00467668	all	0.992271
ENDOV	0.293395	4.93304	7.19913	0.0104067	all	1.44733
ENOPH1	0.230775	2.4512	25.8811	0.00387111	all	0.565676
ENOX2	0.236159	3.5961	6.01002	0.00475791	all	0.849251
ENSA	0.20788	1.9571	390.508	0.00312029	all	0.406842
ENTPD5	0.227359	3.64788	7.20507	0.00459151	all	0.829377
ENTPD7	0.310079	4.84686	13.2473	0.0136727	all	1.50291
ENY2	0.254166	2.98263	14.7883	0.00558474	all	0.758083
EOGT	0.335524	4.07177	11.1215	0.00612147	all	1.36618
EPB41L4B	0.315931	3.85812	9.57163	0.0107248	all	1.2189
EPHA1	0.307316	4.4496	28.4913	0.00559763	all	1.36743
EPOR	0.328776	4.23506	1.78734	0.0219898	all	1.39239
EPRS	0.269432	4.66031	68.6503	0.00490497	all	1.25564
EPS15L1	0.215014	2.77397	11.6737	0.0025728	all	0.596441
ERAL1	0.287338	4.40229	22.7248	0.00227724	all	1.26494
ERBB3	0.297678	5.38554	31.5887	0.00970511	all	1.60316
ERC1	0.333919	4.34535	12.5254	0.010314	all	1.45099
ERCC1	0.305096	3.08815	58.1475	0.010267	all	0.942181
ERCC2	0.336778	3.76805	6.76814	0.00561789	all	1.269
ERCC3	0.197864	3.47996	27.0299	0.0027911	all	0.688558
ERCC4	0.253368	4.09896	3.66632	0.00679169	all	1.03855
ERCC8	0.374044	3.87773	5.01578	0.00926301	all	1.45044
ERGIC1	0.169223	2.01797	25.2264	0.00274798	all	0.341487
ERGIC3	0.222437	2.27947	111.535	0.00464736	all	0.507037
ERH	0.235721	2.88092	77.9482	0.00505857	all	0.679092
ERI1	0.240794	3.20507	20.7979	0.00458572	all	0.771762
ERI2	0.237285	4.73423	9.15859	0.00618598	all	1.12336
ERI3	0.334105	3.29116	28.7536	0.00694453	all	1.09959
ERICH1	0.249889	4.62049	25.4808	0.00364452	all	1.15461
ERLEC1	0.173844	2.048	28.2806	0.00275086	all	0.356033
ERLIN1	0.210587	2.52572	69.5123	0.00271076	all	0.531883
ERLIN2	0.269841	4.6788	62.9989	0.00633842	all	1.26253
ERO1L	0.319317	4.30197	27.6687	0.00848023	all	1.37369
ERP29	0.232037	2.54133	81.1604	0.0050799	all	0.589682
ERP44	0.160098	1.73764	21.7039	0.00223409	all	0.278193
ESD	0.201849	2.21038	99.2636	0.0052065	all	0.446163
ESRP1	0.229279	2.63947	55.1882	0.00399756	all	0.605176
ESYT1	0.274729	2.88827	45.8406	0.00406721	all	0.793491
ETF1	0.12799	1.59849	103.189	0.00142232	all	0.204591
ETFA	0.216741	3.18145	68.7047	0.00559695	all	0.68955
ETFB	0.306214	3.23088	22.0821	0.0100252	all	0.98934
EVA1C	0.389362	3.8856	16.145	0.0277652	all	1.5129
EWSR1	0.2375	3.94717	91.8517	0.00320796	all	0.937453
EXD2	0.282057	3.7629	7.79852	0.00643637	all	1.06135
EXD3	0.321868	4.5105	3.09055	0.0160697	all	1.45179
EXOC2	0.281144	4.18538	17.8806	0.0034522	all	1.17669
EXOC3	0.342706	4.01139	27.6093	0.00691748	all	1.37473
EXOC3L1	0.348252	4.07471	3.05966	0.0135597	all	1.41903
EXOC5	0.238313	3.05565	68.0332	0.00249001	all	0.728203
EXOC7	0.19882	3.51911	60.1865	0.00228743	all	0.699669
EXOSC1	0.160485	1.82462	33.7523	0.00419422	all	0.292823
EXOSC10	0.238043	4.35082	32.239	0.0033557	all	1.03568
EXOSC2	0.276725	4.02753	9.7507	0.00672835	all	1.11452
EXOSC6	0.197187	2.12366	20.9418	0.00333703	all	0.418759
EXOSC7	0.3999	3.57211	31.9704	0.00799462	all	1.42849
EXOSC8	0.361294	4.16007	33.7791	0.0126354	all	1.50301
EXOSC9	0.318642	4.03812	31.9409	0.00899248	all	1.28671
EXT1	0.27026	3.05667	23.1643	0.00499001	all	0.826097
EXT2	0.221077	3.66237	36.9139	0.00395226	all	0.809667
EYA3	0.237658	3.0639	13.2338	0.00362315	all	0.72816
EZR	0.264735	3.32815	230.858	0.00192443	all	0.881078
F2RL1	0.224207	2.17651	33.6729	0.00403998	all	0.487989
FAF1	0.348107	3.12465	36.1052	0.00606682	all	1.08771
FAF2	0.18082	2.53369	31.5407	0.00190412	all	0.458143
FAH	0.288708	3.01929	12.3234	0.0128747	all	0.871694
FAHD1	0.222669	2.45215	16.0922	0.0037854	all	0.546017
FAHD2A	0.323748	4.38653	4.30102	0.00836042	all	1.42013
FAIM	0.212228	2.0862	17.8497	0.00528587	all	0.44275
FAM103A1	0.175246	2.04036	5.3878	0.00712617	all	0.357567
FAM104A	0.154869	1.70419	62.0401	0.00281023	all	0.263927
FAM104B	0.236312	2.92229	18.3106	0.00927678	all	0.690572
FAM114A2	0.225108	2.5238	18.7168	0.00258173	all	0.568127
FAM115C	0.396148	4.05377	6.10234	0.0137176	all	1.60589
FAM118B	0.162348	1.87882	7.02852	0.00321528	all	0.305024
FAM120A	0.278778	3.39529	40.3831	0.00405451	all	0.946532
FAM120AOS	0.200513	2.41163	73.1942	0.0035931	all	0.483563
FAM120B	0.278667	4.51432	17.3932	0.00264083	all	1.25799
FAM122A	0.203319	2.68469	12.3983	0.00345686	all	0.545848
FAM122C	0.320504	3.92076	3.4394	0.0150903	all	1.25662
FAM127A	0.313717	5.18494	127.38	0.00259207	all	1.62661
FAM127C	0.234939	3.66735	14.6943	0.00204902	all	0.861605
FAM131A	0.213944	2.83784	10.7609	0.00367857	all	0.60714
FAM133B	0.299171	5.13814	13.9727	0.00423468	all	1.53718
FAM134A	0.254622	2.95431	45.1485	0.00430942	all	0.752231
FAM134C	0.215586	2.86913	68.7766	0.00317081	all	0.618544
FAM136A	0.216596	2.40287	63.5513	0.00305898	all	0.520454
FAM162A	0.299148	3.77049	43.4132	0.00566758	all	1.12793
FAM168B	0.274038	3.71187	297.259	0.00346018	all	1.01719
FAM173B	0.289285	3.03077	15.2989	0.0104229	all	0.876754
FAM174A	0.243056	3.9156	56.0886	0.00649955	all	0.951709
FAM175B	0.159262	1.98437	19.7009	0.00176049	all	0.316035
FAM177A1	0.192076	1.85273	15.6684	0.00307564	all	0.355867
FAM192A	0.193946	2.4685	100.374	0.00270944	all	0.478756
FAM199X	0.242169	4.62401	13.4069	0.00443298	all	1.11979
FAM200A	0.253813	2.86158	7.71522	0.00765852	all	0.726306
FAM204A	0.318426	3.0051	62.3488	0.00279858	all	0.956902
FAM206A	0.202149	2.14432	26.6736	0.0045332	all	0.433473
FAM210A	0.250863	2.69864	7.78393	0.0044761	all	0.676988
FAM210B	0.310983	3.47143	66.9324	0.00642396	all	1.07955
FAM212A	0.266869	2.72536	21.2006	0.00588534	all	0.727315
FAM214B	0.310431	3.78266	15.8438	0.00518871	all	1.17426
FAM217B	0.227039	3.03272	7.31075	0.00371734	all	0.688548
FAM219B	0.26851	3.81984	146.068	0.00843277	all	1.02567
FAM21C	0.285162	5.25381	8.12419	0.00632386	all	1.49819
FAM220A	0.154273	1.76112	148.351	0.002438	all	0.271693
FAM32A	0.188669	2.01742	131.598	0.00345226	all	0.380625
FAM35A	0.338789	3.94181	14.6646	0.00203443	all	1.33544
FAM3C	0.337513	3.77201	47.9136	0.0123004	all	1.2731
FAM45A	0.161241	1.83185	16.7744	0.00219637	all	0.295369
FAM45B	0.287979	3.1376	0.55228	0.00150405	all	0.903563
FAM49B	0.281311	3.60744	32.1101	0.00394679	all	1.01481
FAM50A	0.228885	2.50618	37.5356	0.00213701	all	0.573628
FAM57A	0.302113	3.10664	25.0463	0.00573183	all	0.938557
FAM58A	0.270837	3.38498	18.6034	0.00540919	all	0.916777
FAM60A	0.334434	4.59619	41.7419	0.00592799	all	1.53712
FAM63A	0.298074	3.8112	30.8363	0.00849401	all	1.13602
FAM69A	0.266803	2.92334	9.47549	0.00429421	all	0.779956
FAM76A	0.312447	5.06147	39.8457	0.00634561	all	1.58144
FAM91A1	0.281689	5.11137	31.864	0.00546594	all	1.43982
FAM96A	0.286128	3.13386	61.0862	0.00692217	all	0.896687
FAM96B	0.331594	4.45046	39.2733	0.00987384	all	1.47575
FAM98A	0.221798	2.36716	30.0821	0.00174549	all	0.525032
FAM98B	0.245746	3.46474	11.4308	0.00363818	all	0.851447
FARS2	0.327913	3.79279	19.6949	0.0136487	all	1.24371
FARSB	0.209827	2.39462	57.258	0.00307329	all	0.502457
FAS	0.338255	4.22315	58.7196	0.0172125	all	1.4285
FASTK	0.349766	4.29286	43.5768	0.00391847	all	1.5015
FASTKD1	0.268325	3.35057	12.1879	0.00582531	all	0.89904
FASTKD2	0.236905	3.49059	18.1004	0.00214942	all	0.82694
FASTKD5	0.204305	2.88971	12.9756	0.00398275	all	0.590383
FAU	0.340466	3.06626	457.742	0.0149366	all	1.04396
FBL	0.304846	3.74222	197.318	0.0060408	all	1.1408
FBXL12	0.276228	3.32091	21.6896	0.00349861	all	0.917329
FBXL14	0.347642	4.0446	47.3842	0.0116899	all	1.40607
FBXL17	0.255693	3.69971	9.57502	0.00437958	all	0.945989
FBXL5	0.305986	2.78975	57.7984	0.00189644	all	0.853627
FBXO18	0.206946	3.17786	32.9982	0.00254199	all	0.657647
FBXO21	0.265929	4.13567	37.7002	0.00464381	all	1.09979
FBXO22	0.332776	3.26725	15.9585	0.0024917	all	1.08726
FBXO25	0.298107	2.83107	14.9197	0.00952828	all	0.843961
FBXO28	0.214933	2.79971	33.0015	0.00155981	all	0.60175
FBXO3	0.329476	3.89894	45.2701	0.00323302	all	1.28461
FBXO31	0.266358	3.68703	10.9863	0.00631819	all	0.98207
FBXO33	0.328499	4.68912	11.0842	0.00367317	all	1.54037
FBXO34	0.273383	3.67692	24.687	0.00373572	all	1.00521
FBXO36	0.285781	3.6794	3.03694	0.0114451	all	1.0515
FBXO4	0.279393	3.0575	11.902	0.00605557	all	0.854246
FBXO42	0.228553	2.70914	11.377	0.00181121	all	0.619181
FBXO48	0.344208	4.42131	2.29829	0.0146503	all	1.52185
FBXO7	0.223906	2.21641	84.4938	0.00267109	all	0.496266
FBXO8	0.38496	3.23074	28.9617	0.00522514	all	1.24371
FBXO9	0.291865	3.34017	25.7657	0.00718113	all	0.974878
FBXW11	0.208607	2.43261	67.8418	0.00243284	all	0.507459
FBXW2	0.219849	3.2649	52.5844	0.00225012	all	0.717784
FBXW4	0.318373	3.2711	43.3306	0.00611601	all	1.04143
FCF1	0.210417	2.69837	53.2207	0.00222964	all	0.567782
FCGRT	0.355329	4.14043	30.3041	0.0173306	all	1.47122
FCHO2	0.296275	4.83276	20.5173	0.00379357	all	1.43183
FDX1	0.204113	2.25962	10.6032	0.0062223	all	0.461217
FDXACB1	0.301235	4.41174	1.3042	0.0138814	all	1.32897
FECH	0.265625	3.11246	27.8167	0.0051113	all	0.826749
FEM1B	0.318418	4.63985	365.849	0.00483036	all	1.47741
FEM1C	0.25316	3.28754	14.2733	0.00437257	all	0.832275
FEZ2	0.323737	4.19531	23.3008	0.00348354	all	1.35818
FGD5-AS1	0.244698	3.11126	122.712	0.00365417	all	0.761318
FGFR1OP	0.304387	4.72658	10.7127	0.00720643	all	1.43871
FH	0.264668	2.44007	74.8858	0.0049362	all	0.645809
FIBP	0.299943	3.97664	28.446	0.00534556	all	1.19277
FICD	0.370044	3.74175	6.25425	0.0125432	all	1.38461
FIP1L1	0.303585	3.75119	13.6661	0.00294844	all	1.1388
FIS1	0.260365	2.47954	111.882	0.00732145	all	0.645585
FIZ1	0.334029	4.25929	38.3367	0.00453825	all	1.42273
FKBP14	0.293868	3.47066	37.5711	0.00426076	all	1.01991
FKBP15	0.252549	3.36105	22.3237	0.00286579	all	0.848829
FKBP2	0.280537	3.57469	52.8023	0.00663885	all	1.00283
FKBP3	0.174598	2.48251	19.9273	0.00399842	all	0.43344
FKBP4	0.358423	3.19216	76.1687	0.00872089	all	1.14414
FKBP9	0.279806	3.32903	74.182	0.0047051	all	0.931482
FKBPL	0.30475	3.83724	18.7092	0.00640517	all	1.1694
FLAD1	0.304882	3.95617	52.3868	0.00468955	all	1.20617
FLCN	0.286468	5.42278	6.52684	0.0107548	all	1.55345
FLII	0.27624	2.87261	56.7065	0.00250361	all	0.79353
FLJ11235	0.306256	3.29327	1.91024	0.00931538	all	1.00858
FLNB	0.302832	5.03947	50.6081	0.00801359	all	1.52611
FLOT1	0.305502	4.05027	42.3366	0.00338823	all	1.23736
FLVCR2	0.311736	3.01566	16.8581	0.0107672	all	0.940089
FMNL2	0.349386	4.05122	17.84	0.010359	all	1.41544
FN3KRP	0.308774	3.73424	62.6669	0.00477481	all	1.15304
FNTA	0.20125	2.43695	89.4971	0.00232628	all	0.490437
FOPNL	0.167988	1.87061	110.593	0.00249013	all	0.314239
FOXK2	0.258024	2.9704	17.6397	0.0022444	all	0.766432
FOXN2	0.334474	3.62354	11.9312	0.00542581	all	1.21198
FOXO1	0.3576	4.2097	24.6435	0.00692382	all	1.50539
FRAT1	0.307802	3.53154	12.4957	0.0135594	all	1.08701
FRAT2	0.313573	4.01691	14.3426	0.010145	all	1.2596
FRG1	0.234398	2.2992	45.645	0.00616503	all	0.538928
FRMD4B	0.34657	4.15089	23.3372	0.00389743	all	1.43857
FRMD6	0.282163	3.32798	40.9462	0.00337101	all	0.939034
FTSJ1	0.250692	3.1638	21.4596	0.00165734	all	0.793139
FTSJ2	0.302879	3.38192	27.2887	0.00539823	all	1.02431
FTSJ3	0.206312	3.08097	33.3819	0.00274361	all	0.635641
FTSJD1	0.193366	2.83043	32.748	0.00263363	all	0.54731
FUBP3	0.216424	2.93626	39.3367	0.00208307	all	0.635476
FUCA2	0.245375	3.58892	16.6095	0.00743634	all	0.880632
FUNDC1	0.235758	2.58634	12.5823	0.0057213	all	0.609751
FUNDC2	0.200971	2.28187	14.3671	0.00546562	all	0.458589
FUT11	0.240207	2.95786	44.5765	0.0041311	all	0.710499
FXN	0.240463	2.66141	11.1486	0.00890449	all	0.639969
FXR1	0.269848	2.92457	32.8877	0.00330984	all	0.789189
FXR2	0.293202	3.95297	20.1998	0.00550616	all	1.15902
FYCO1	0.256198	4.92458	32.5149	0.00543155	all	1.26167
FYTTD1	0.157488	2.16239	52.757	0.00180987	all	0.34055
FZD1	0.284239	3.29999	15.6822	0.00631934	all	0.937987
G3BP1	0.299111	3.95931	110.501	0.00307368	all	1.18427
G3BP2	0.262616	3.85004	39.2952	0.00485667	all	1.01108
GABARAP	0.324552	4.20872	15.0785	0.013053	all	1.36595
GABARAPL2	0.198358	2.36678	49.8407	0.0040025	all	0.46947
GABPA	0.277504	4.01563	18.1654	0.00378243	all	1.11435
GABPB1	0.229533	2.8148	17.0007	0.00367452	all	0.646088
GALNS	0.262396	2.71	11.4896	0.00455932	ref	0.711093
GALNT1	0.302453	3.97757	175.73	0.00715961	all	1.20303
GALNT10	0.249548	2.7791	7.69655	0.0046122	all	0.693519
GALNT3	0.282262	3.25249	20.2997	0.00579706	all	0.918055
GANAB	0.392834	4.08963	98.4705	0.00606234	all	1.60654
GAPDH	0.352955	3.97016	1061.44	0.0124914	all	1.40129
GAR1	0.312137	4.88089	18.4282	0.00508448	all	1.52351
GAREM	0.269814	3.0761	27.4139	0.00576094	all	0.829976
GARS	0.222346	2.51821	80.5673	0.00173568	all	0.559913
GART	0.291699	3.1525	32.572	0.00508699	all	0.91958
GAS5	0.308942	3.40284	110.652	0.0130782	all	1.05128
GATAD2A	0.313979	3.81344	19.5209	0.00254193	all	1.19734
GATC	0.235287	3.119	38.6069	0.00464525	all	0.733859
GBA	0.345446	3.94558	64.1151	0.0073363	all	1.36299
GBAS	0.276048	3.10159	33.1666	0.0084857	all	0.856185
GBE1	0.257136	2.60897	27.3227	0.00222406	all	0.67086
GBF1	0.337896	4.78692	28.7655	0.00664121	all	1.61748
GCC1	0.19768	3.16313	91.5436	0.00294149	all	0.625288
GCDH	0.387301	3.82295	7.22865	0.0130381	all	1.48063
GCH1	0.331625	4.52023	17.7928	0.00975554	all	1.49902
GCLM	0.340999	4.38899	8.81311	0.0117637	all	1.49664
GCNT4	0.324898	3.09172	9.33513	0.0122266	all	1.00449
GDAP1	0.340875	3.9793	15.3859	0.00982226	all	1.35644
GDE1	0.198979	2.17565	69.1552	0.0033383	all	0.432908
GDI1	0.358058	4.26979	30.2596	0.00280407	all	1.52883
GDI2	0.132843	1.62087	348.177	0.00134958	all	0.21532
GEMIN2	0.299098	3.20837	7.02266	0.007765	all	0.959616
GEMIN4	0.269368	3.34341	116.199	0.00491194	all	0.90061
GEMIN5	0.343497	4.02967	10.3642	0.0082669	all	1.38418
GEMIN6	0.219369	2.44721	9.72545	0.00948148	all	0.536841
GEMIN7	0.250046	2.95728	10.6933	0.00859786	all	0.739456
GEMIN8	0.274216	2.76906	29.1388	0.00511307	all	0.75932
GFM1	0.212689	3.25783	32.9908	0.00278147	all	0.692904
GFOD2	0.28071	3.11041	149.222	0.0038698	all	0.873123
GGA1	0.318077	4.05846	35.5822	0.00614265	all	1.2909
GGCT	0.331453	3.92569	184.232	0.0133693	all	1.30118
GGCX	0.22883	2.5841	10.5803	0.00348842	all	0.591319
GGNBP2	0.217895	4.5522	39.419	0.00182834	all	0.991904
GGPS1	0.226815	2.23504	77.0764	0.00583323	all	0.506942
GHITM	0.199897	2.29465	160.688	0.00287897	all	0.458695
GID4	0.220819	2.29349	13.6602	0.00249579	all	0.506447
GID8	0.247718	2.91788	88.5729	0.00266853	all	0.722813
GINM1	0.192932	2.03233	45.0357	0.00252999	all	0.392102
GJB3	0.327132	4.32387	116.799	0.00860105	all	1.41447
GJB5	0.254531	3.02192	64.9151	0.00834066	all	0.769172
GK	0.324342	4.15776	21.6309	0.0118552	all	1.34853
GLA	0.253027	2.57454	18.2318	0.0055909	all	0.651428
GLB1	0.216397	2.54617	19.1921	0.00338088	all	0.550983
GLB1L	0.290134	5.53868	3.2057	0.0127179	all	1.60696
GLE1	0.307228	4.87091	26.7855	0.00577876	all	1.49648
GLMN	0.294996	4.3631	13.5143	0.00689244	all	1.2871
GLO1	0.240075	2.36685	90.5372	0.00548695	all	0.568221
GLOD4	0.180389	2.44577	73.0027	0.00245743	all	0.44119
GLRX2	0.186827	2.35321	18.8715	0.00493206	all	0.439642
GLRX3	0.268416	2.632	75.934	0.0055798	all	0.70647
GLT8D1	0.35221	3.68648	25.4937	0.00567337	all	1.29842
GLTP	0.288074	3.21832	1214.87	0.00514573	all	0.927115
GLUD1	0.292534	2.82732	97.9248	0.00183123	all	0.827087
GLUL	0.368084	4.25613	125.249	0.0188184	all	1.56661
GLYCTK	0.250447	2.74929	2.43562	0.0123653	all	0.688552
GLYR1	0.186254	3.35119	21.4723	0.00215669	all	0.624172
GM2A	0.344201	3.27369	167.385	0.011235	all	1.12681
GMDS	0.32802	3.71103	12.0105	0.0178429	all	1.21729
GMEB1	0.211166	3.28547	13.6748	0.00376428	all	0.693777
GMFB	0.220632	2.34682	131.527	0.00289304	all	0.517783
GMNN	0.365523	4.23737	27.7869	0.0161497	all	1.54886
GMPPA	0.298434	3.23065	19.2331	0.00482524	all	0.964138
GMPR2	0.145891	1.87261	24.8627	0.00152595	all	0.273197
GMPS	0.331223	4.74295	28.5581	0.00733981	all	1.57098
GNA13	0.304856	3.77606	108.188	0.00342985	all	1.15116
GNAI1	0.287707	3.28952	113.229	0.00595351	all	0.946419
GNAI2	0.338831	4.75385	94.6535	0.00651647	all	1.61075
GNAI3	0.13515	1.6553	110.558	0.00186753	all	0.223714
GNB1	0.249236	3.4799	164.255	0.00146886	all	0.867318
GNB1L	0.309349	3.53353	5.38994	0.0119157	all	1.09309
GNB2L1	0.263026	2.70946	881.297	0.0109097	all	0.712659
GNB5	0.295059	3.78441	5.76267	0.00713074	all	1.11662
GNG12	0.231058	2.24455	116.617	0.0025952	all	0.518622
GNG5	0.332586	4.72696	88.8819	0.0077515	all	1.57212
GNL1	0.295905	3.713	16.4307	0.00333179	all	1.0987
GNL2	0.228578	2.44443	55.3977	0.00343458	all	0.558742
GNL3	0.25664	3.5411	73.6729	0.0042956	all	0.908787
GNPAT	0.393348	3.63882	43.727	0.0182714	all	1.43132
GNPDA1	0.248215	2.95083	25.0502	0.00341484	all	0.73244
GNPNAT1	0.26032	3.73662	49.5755	0.00679122	all	0.972716
GNPTG	0.230561	2.14135	18.7377	0.00422486	all	0.49371
GNS	0.34093	3.88243	89.3261	0.00464199	all	1.32364
GOLGA1	0.21271	4.25289	11.4338	0.00383831	all	0.904635
GOLGA2	0.25437	5.41701	52.7499	0.00666027	all	1.37793
GOLGA5	0.168732	2.56808	35.5225	0.00167277	all	0.433316
GOLGA7	0.165325	1.852	51.7034	0.00355132	all	0.306182
GOLM1	0.235494	3.5613	22.1853	0.00485646	all	0.838666
GOLPH3	0.154398	2.15503	162.451	0.00144495	all	0.332731
GOLT1B	0.210674	2.81258	119.008	0.00454146	all	0.592536
GORASP1	0.236323	2.94145	37.6197	0.0026162	all	0.695134
GORASP2	0.240272	3.20585	52.379	0.000980943	all	0.770275
GOSR1	0.198143	3.43689	66.032	0.00263302	all	0.680996
GOSR2	0.137717	1.79319	21.795	0.00227961	all	0.246953
GOT1	0.34221	3.53916	39.1012	0.00969675	all	1.21114
GOT2	0.253745	3.33526	45.5384	0.00294861	all	0.846305
GPANK1	0.292484	3.45864	20.9506	0.00652117	all	1.0116
GPATCH3	0.229058	2.70584	16.0068	0.00336505	all	0.619795
GPATCH4	0.30903	2.981	31.513	0.00471595	all	0.921219
GPBP1L1	0.261997	4.03085	81.6256	0.00278929	all	1.05607
GPCPD1	0.302082	5.15088	26.9935	0.00824942	all	1.55599
GPKOW	0.15955	2.01394	20.6792	0.00264881	all	0.321325
GPN1	0.209676	2.17158	19.0385	0.00414904	all	0.455329
GPN2	0.189272	2.20747	55.0827	0.00285017	all	0.417814
GPN3	0.341863	3.16605	18.2155	0.0122816	all	1.08235
GPR107	0.252959	4.20131	19.9415	0.00442962	all	1.06276
GPR108	0.256696	3.23393	36.3051	0.00311866	all	0.830136
GPR137B	0.301873	4.41762	33.1114	0.00850661	all	1.33356
GPR157	0.297639	3.87124	24.6877	0.00542376	all	1.15223
GPR87	0.240318	2.19958	50.4157	0.00675244	all	0.528599
GPS1	0.309792	4.71694	48.6067	0.00230658	all	1.46127
GRAMD3	0.285092	2.84151	29.2316	0.00310401	all	0.810092
GRB10	0.302602	4.94697	17.1508	0.00783606	all	1.49696
GRB2	0.23498	2.4292	34.4453	0.00172777	all	0.570815
GRHL1	0.235115	3.97125	131.303	0.0055135	all	0.933702
GRHPR	0.151021	1.905	62.8508	0.00230231	all	0.287695
GRK4	0.283312	4.71536	4.75564	0.0116275	all	1.33592
GRK5	0.346636	3.18468	9.1096	0.0161803	all	1.10392
GRPEL1	0.192674	2.2627	161.065	0.0050013	all	0.435962
GRPEL2	0.182947	2.42543	15.0085	0.00237732	all	0.443726
GRSF1	0.171648	2.37993	124.241	0.00192318	all	0.408509
GS1-124K5.12	0.224862	3.8697	10.4656	0.00815542	all	0.870147
GS1-251I9.4	0.279687	3.8752	8.44147	0.00486462	all	1.08385
GSK3B	0.301848	4.00971	135.223	0.00635123	all	1.21032
GSKIP	0.162798	2.35158	34.7533	0.00243467	all	0.382834
GSPT1	0.205007	2.32115	192.098	0.0019663	all	0.475854
GSS	0.25087	2.92756	39.2538	0.00304067	all	0.734437
GSTA4	0.255193	3.05103	170.504	0.0055086	all	0.778602
GSTK1	0.322971	2.85386	52.7721	0.00877385	all	0.921715
GSTO2	0.351766	4.24689	12.3715	0.0126474	all	1.49391
GSTZ1	0.279042	2.65782	9.83953	0.00827896	all	0.741644
GTDC1	0.348825	3.51242	13.3648	0.00509089	all	1.22522
GTF2A1	0.319176	4.54998	70.6975	0.00895129	all	1.45225
GTF2A2	0.214821	3.54466	80.7722	0.0066776	all	0.761469
GTF2B	0.202678	2.21966	40.4041	0.0043119	all	0.449876
GTF2E1	0.199768	2.75588	7.66352	0.00403851	all	0.550537
GTF2E2	0.207399	2.58308	64.3825	0.00427546	all	0.535728
GTF2F1	0.224832	2.5475	48.8871	0.00124846	all	0.572759
GTF2F2	0.252909	2.89479	47.6789	0.00364907	all	0.73212
GTF2H1	0.214352	2.43578	32.8412	0.00240443	all	0.522114
GTF2H3	0.212934	2.98414	20.5348	0.00280336	all	0.635426
GTF2H5	0.315965	3.15213	17.6039	0.0134204	all	0.995964
GTF2I	0.306492	5.18423	33.7347	0.00686663	all	1.58892
GTF2IP1	0.327388	4.95875	1.34569	0.0145963	all	1.62343
GTF3A	0.249051	2.39333	62.6353	0.00498209	all	0.596061
GTF3C2	0.291009	3.61966	29.4327	0.00287293	all	1.05335
GTF3C3	0.293373	5.00741	19.3365	0.00333702	all	1.46904
GTF3C6	0.285496	3.45798	78.0155	0.00532647	all	0.987239
GTPBP1	0.318643	4.18501	16.8165	0.00300602	all	1.33352
GTPBP2	0.316874	3.55285	61.3415	0.00458815	all	1.12581
GTPBP4	0.237496	2.72326	45.5288	0.00357932	all	0.646764
GTPBP5	0.315368	4.24322	37.2305	0.0043821	all	1.33818
GTPBP8	0.27896	2.89242	15.0389	0.0073799	all	0.806869
GUCD1	0.207086	2.6561	54.691	0.00210282	all	0.55004
GUF1	0.254727	3.37445	15.5677	0.00316287	all	0.859563
GUK1	0.311599	4.01697	190.994	0.00632973	all	1.25168
GYG1	0.326235	3.64967	19.5254	0.00715082	all	1.19065
GZF1	0.216164	4.16924	5.40801	0.00244216	all	0.901239
H2AFY	0.18842	1.92375	260.951	0.00150636	all	0.362473
H3F3A	0.313445	3.82922	202.79	0.0068904	all	1.20025
H3F3AP4	0.335174	3.78042	144.572	0.0148419	all	1.2671
H3F3B	0.202267	2.34512	392.45	0.0041635	all	0.47434
HABP4	0.316309	2.98323	2.75384	0.00774588	all	0.943623
HADHA	0.172303	2.26816	102.716	0.00228725	all	0.39081
HADHB	0.289407	3.76474	61.771	0.00796278	all	1.08954
HAGH	0.274729	3.18698	11.1035	0.00893345	all	0.875558
HARBI1	0.18416	2.10064	5.12315	0.00598756	all	0.386855
HARS	0.164128	1.79078	46.5804	0.00166619	all	0.293917
HARS2	0.244983	3.70603	20.3635	0.00373745	all	0.907912
HAT1	0.223372	2.26315	18.5607	0.00275454	all	0.505525
HAUS1	0.297534	2.93919	21.5586	0.0110203	all	0.874509
HAUS2	0.203847	2.7328	51.9915	0.00297924	all	0.557073
HAX1	0.26381	2.80513	84.0021	0.00680217	all	0.740021
HBS1L	0.313763	3.6444	15.0259	0.00202865	all	1.14348
HCCS	0.184069	2.13912	45.5982	0.00259444	all	0.393747
HDAC11	0.32611	3.68827	10.0854	0.0111685	all	1.20278
HDAC2	0.298399	4.13526	77.9975	0.00320714	all	1.23396
HDAC3	0.177785	1.97176	36.648	0.00230879	all	0.350551
HDAC5	0.330892	3.38186	30.6323	0.00604496	all	1.11903
HDAC8	0.362419	3.95317	12.005	0.00322623	all	1.4327
HDDC2	0.283324	2.96425	43.0559	0.00820288	all	0.839842
HDDC3	0.284004	2.79402	12.6734	0.0158036	all	0.793514
HDGF	0.29796	4.79359	303.044	0.00232393	all	1.4283
HDGFRP3	0.348733	4.6177	39.5722	0.0133074	all	1.61034
HDHD1	0.394186	4.015	11.3705	0.0203921	all	1.58265
HDHD2	0.31753	3.08019	14.5478	0.00371778	all	0.978053
HDLBP	0.16784	2.05188	189.929	0.00181658	all	0.344386
HEATR3	0.315984	3.96844	13.5056	0.0105284	all	1.25396
HEATR5A	0.325363	4.69584	5.61263	0.00503093	all	1.52785
HEATR6	0.270761	5.30162	10.1041	0.00565646	all	1.43547
HEBP1	0.227816	2.75499	12.1885	0.00590577	all	0.62763
HEBP2	0.321415	3.05259	221.289	0.0114011	all	0.981148
HECA	0.276873	5.43743	39.3324	0.00608757	all	1.50548
HERPUD1	0.284886	3.57863	49.4409	0.00857078	all	1.0195
HERPUD2	0.181909	2.2829	30.8259	0.00250491	all	0.41528
HES1	0.307787	3.01564	33.8624	0.00899764	all	0.928176
HEXB	0.171365	1.90907	60.0092	0.00217784	all	0.327147
HEXIM1	0.279224	4.28819	21.6087	0.00509489	all	1.19737
HEY1	0.320644	3.45118	2.19082	0.0162909	all	1.1066
HFE	0.308092	4.75545	14.3067	0.0116923	all	1.46512
HGSNAT	0.249858	2.77181	23.9005	0.00307058	all	0.692558
HIAT1	0.170875	2.38942	45.608	0.00232238	all	0.408292
HIATL1	0.232994	2.72209	62.4804	0.00364189	all	0.634232
HIATL2	0.34744	3.82487	6.51218	0.0161376	all	1.32891
HIF1AN	0.229162	3.23694	26.1592	0.00385611	all	0.741785
HIGD2A	0.274933	2.77588	44.6458	0.0118897	all	0.763183
HINFP	0.318235	4.76059	18.2639	0.00846773	all	1.51498
HINT2	0.34934	3.4944	22.8334	0.0149743	all	1.22073
HINT3	0.32095	3.5213	23.3689	0.00992397	all	1.13016
HK1	0.26023	3.81007	66.7557	0.00393479	all	0.991495
HMG20A	0.250229	4.23936	9.3629	0.00441703	all	1.06081
HMGB1	0.2403	2.49332	515.178	0.00374559	all	0.599146
HMGCL	0.394333	3.9587	10.7969	0.0171542	all	1.56105
HMGN1	0.296371	2.74252	123.154	0.00592775	all	0.812802
HMGN3	0.336382	3.23169	73.1227	0.0131501	all	1.08708
HMGN4	0.263514	2.68557	675.647	0.00469195	all	0.707687
HMGXB3	0.26129	4.79807	19.7092	0.00494048	all	1.25369
HMGXB4	0.294855	5.35765	12.7835	0.0057186	all	1.57973
HN1L	0.225162	2.83131	326.423	0.00149338	all	0.637502
HNRNPA1	0.2188	2.12933	396.35	0.00189538	all	0.465897
HNRNPA1P10	0.311019	4.02059	2.14825	0.0125489	all	1.25048
HNRNPA2B1	0.33266	3.88052	469.446	0.0043058	all	1.29089
HNRNPA3	0.296806	4.08961	98.236	0.00272097	all	1.21382
HNRNPAB	0.303621	3.96749	105.902	0.00208802	all	1.20461
HNRNPC	0.171493	1.97028	339.846	0.00200166	all	0.337888
HNRNPF	0.18793	1.9392	358.922	0.00155216	all	0.364435
HNRNPH2	0.151002	2.09972	70.6221	0.00139469	all	0.317063
HNRNPH3	0.329489	3.61405	44.4913	0.00552915	all	1.19079
HNRNPK	0.15697	2.13052	383.692	0.00121973	all	0.334428
HNRNPL	0.266892	3.10139	126.957	0.00199723	all	0.827736
HNRNPM	0.329228	3.98218	73.6106	0.00293432	all	1.31104
HNRNPR	0.293648	3.80447	76.8644	0.00296641	all	1.11718
HNRNPU	0.278438	4.06371	126.816	0.00453984	all	1.13149
HNRPLL	0.344632	3.35091	11.3357	0.00274441	all	1.15483
HOMER2	0.304607	3.61451	63.0184	0.00871874	all	1.10101
HOMEZ	0.327514	4.87914	16.6017	0.0196664	all	1.59799
HPS1	0.254694	2.73772	19.7296	0.00250067	all	0.697279
HPS6	0.276889	3.09612	15.6268	0.0023544	all	0.857283
HS1BP3	0.253383	2.80054	5.10102	0.00633177	all	0.709611
HSBP1	0.191016	2.42725	21.4773	0.00402413	all	0.463643
HSBP1L1	0.258377	2.51762	26.0217	0.00993077	all	0.650494
HSCB	0.237674	3.07876	10.6015	0.00937944	all	0.731741
HSD17B1	0.208305	2.59648	6.41467	0.00838198	all	0.54086
HSD17B10	0.294645	3.26837	113.42	0.0050013	all	0.963008
HSD17B4	0.265699	3.19459	54.9999	0.00437522	all	0.848798
HSD17B8	0.365404	3.38847	22.3359	0.0161303	all	1.23816
HSD3B7	0.363463	4.22053	13.1629	0.0153047	all	1.53401
HSDL2	0.245456	2.77673	39.8596	0.00345589	all	0.681565
HSP90AA1	0.329725	3.66663	393.067	0.0053943	all	1.20898
HSP90AB1	0.281555	3.00969	516.581	0.00389736	all	0.847395
HSP90B1	0.258489	3.71801	220.838	0.00359039	all	0.961067
HSPA13	0.239873	2.36894	10.4485	0.00345126	all	0.568244
HSPA14	0.169351	2.81515	27.5659	0.00258181	all	0.47675
HSPA4	0.231892	2.47399	60.1027	0.00367784	all	0.573698
HSPA8	0.265473	2.91052	873.973	0.00399839	all	0.772665
HSPA9	0.236172	2.8857	141.14	0.00454068	all	0.681521
HSPB11	0.305095	3.29089	23.3823	0.0102144	all	1.00403
HSPB8	0.383317	3.92325	129.544	0.0123675	all	1.50385
HSPD1	0.340673	3.96905	150.507	0.0075351	all	1.35215
HTATIP2	0.286522	2.67812	19.3293	0.00923837	all	0.767339
HTATSF1	0.228788	4.61301	28.6337	0.00353171	all	1.0554
HTRA2	0.259001	3.13522	8.39946	0.00568152	all	0.812026
HUS1	0.252749	2.53648	19.7636	0.0049606	all	0.641093
HYAL2	0.303325	4.3436	29.0339	0.00517163	all	1.31752
HYLS1	0.346815	3.62694	4.1156	0.0185778	all	1.25788
IAH1	0.263494	2.81735	23.7834	0.00707785	all	0.742357
IARS	0.284418	4.41277	63.7944	0.00578253	all	1.25507
IARS2	0.205306	2.84247	77.7745	0.00284683	all	0.583577
ICMT	0.210855	2.16769	72.8212	0.00223139	all	0.457069
ICT1	0.204436	2.22988	34.483	0.00488845	all	0.455868
IDH3A	0.219372	2.31986	17.541	0.00302167	all	0.508913
IDH3B	0.286396	3.13871	53.2353	0.00489919	all	0.898914
IDH3G	0.238929	2.53264	31.991	0.00262363	all	0.605122
IDNK	0.381725	4.03487	4.65647	0.0155392	all	1.54021
IDS	0.302719	4.20947	213.564	0.00451852	all	1.27429
IER3IP1	0.2957	5.43796	26.4325	0.0142994	all	1.608
IFI16	0.320588	3.79089	130.36	0.00544536	all	1.21531
IFNAR1	0.260138	3.27366	60.286	0.00446092	all	0.851601
IFNAR2	0.325675	3.87846	6.46257	0.0170304	all	1.26312
IFNGR1	0.245621	2.40876	155.078	0.00508821	all	0.591643
IFNGR2	0.24233	2.51831	44.6623	0.00732697	all	0.610262
IFRD1	0.270861	3.47972	77.1008	0.00832431	all	0.942519
IFT20	0.234606	2.97334	24.5052	0.00749596	all	0.697564
IFT43	0.205905	2.24249	5.49535	0.00787397	all	0.46174
IFT46	0.201737	2.4005	16.5108	0.00474585	all	0.484269
IFT52	0.289561	3.22329	17.7785	0.00814294	all	0.933341
IFT57	0.221696	2.7106	16.8297	0.00445987	all	0.600931
IGBP1	0.245008	2.66443	37.2372	0.00568029	all	0.652805
IK	0.177852	2.42889	61.835	0.00185243	all	0.431983
IKBIP	0.286576	3.5056	5.72747	0.0141549	all	1.00462
IKBKAP	0.29308	5.37397	18.4833	0.00672378	all	1.575
IKBKG	0.299606	4.03225	12.7596	0.00341215	all	1.20809
IKZF5	0.269308	4.66646	13.0861	0.00698553	all	1.25672
IL10RB	0.224521	2.22121	16.3897	0.00746518	all	0.498707
IL13RA1	0.302599	3.56122	53.5808	0.0128868	all	1.07762
IL17RA	0.308454	3.92048	9.15154	0.00687995	all	1.20929
IL17RC	0.299011	3.62553	20.2842	0.00382864	all	1.08407
IL1R1	0.288187	3.37613	26.6747	0.00852791	all	0.972957
IL1RAP	0.329908	3.80953	27.3034	0.0145183	all	1.2568
IL1RL2	0.271693	3.84937	16.4034	0.00713001	all	1.04585
IL22RA1	0.302318	3.04921	32.1029	0.00677241	all	0.921833
ILF2	0.290225	2.75236	160.092	0.00421077	all	0.798804
ILKAP	0.221036	3.2885	27.3185	0.00379453	all	0.726879
IMMT	0.209509	2.57147	33.9931	0.00314639	all	0.538746
IMP3	0.273404	4.161	131.487	0.00318667	all	1.13763
IMP4	0.270192	4.03076	57.3622	0.00298607	all	1.08908
IMPA1	0.216101	2.58058	29.7187	0.00499334	all	0.557667
IMPACT	0.279232	3.84498	17.0987	0.00620246	all	1.07364
IMPAD1	0.303231	4.31923	319.781	0.0080969	all	1.30972
IMPDH2	0.21617	2.5993	144.081	0.0036794	all	0.561891
ING1	0.382011	4.17969	59.3896	0.0120272	all	1.59669
ING2	0.301893	2.73449	28.9875	0.00926153	all	0.825523
ING3	0.318319	3.55755	6.37721	0.00726986	all	1.13244
ING4	0.330587	4.11346	34.5432	0.011231	all	1.35986
INIP	0.240774	2.8513	35.8479	0.00446868	all	0.686519
INO80B	0.274887	3.04879	27.325	0.00621583	all	0.838072
INO80C	0.231039	2.4453	20.428	0.00759673	all	0.564961
INPP1	0.351376	4.32934	30.0248	0.00822542	all	1.52123
INPP5A	0.245522	2.74231	12.8514	0.00445946	all	0.673297
INPP5K	0.22169	2.22686	21.887	0.00366601	all	0.493673
INSIG2	0.325697	3.94938	69.1464	0.00611436	all	1.2863
INTS10	0.243437	2.69843	41.3035	0.00316721	all	0.656898
INTS12	0.190555	2.09491	8.07867	0.00562775	all	0.399194
INTS7	0.293453	4.5157	11.5518	0.00618456	all	1.32514
INTS8	0.301879	3.94773	19.5754	0.0042477	all	1.19174
INTS9	0.234021	3.36901	11.6287	0.00433294	all	0.78842
IP6K1	0.33757	3.90842	48.624	0.00484646	all	1.31936
IP6K2	0.305227	4.02845	56.4708	0.00721814	all	1.22959
IPO11	0.295198	3.26554	8.54176	0.00456531	all	0.963981
IPO5	0.243496	2.97481	48.6689	0.00301504	all	0.724355
IPO7	0.232439	4.02539	54.8381	0.00434608	all	0.935658
IPO8	0.249462	3.71149	23.8598	0.00396444	all	0.925876
IPPK	0.223515	2.86027	15.0427	0.00539197	all	0.639313
IQCK	0.27253	2.94309	6.92934	0.0121057	all	0.80208
IQGAP1	0.336687	4.5167	82.7017	0.00382449	all	1.52071
IRAK4	0.275134	3.97466	38.9092	0.00598713	all	1.09356
IRF2	0.277947	4.27019	20.2683	0.00808525	all	1.18689
IRGQ	0.264615	4.76639	5.826	0.00667254	all	1.26126
ISCA1	0.197353	2.11073	59.3086	0.00461694	all	0.41656
ISCA2	0.23298	2.60162	10.4178	0.00997338	all	0.606126
ISCU	0.323258	3.35136	66.6646	0.00986079	all	1.08335
IST1	0.182918	2.54169	28.7852	0.00251858	all	0.46492
ISY1	0.236744	2.5728	12.7635	0.00459448	all	0.609096
ITFG1	0.35663	3.57941	32.0952	0.00273938	all	1.27652
ITGAE	0.245086	2.75616	6.43767	0.00620326	all	0.675498
ITGB1	0.359114	3.36429	156.541	0.0134937	all	1.20817
ITGB1BP1	0.168583	2.25743	19.6811	0.00223885	all	0.380565
ITGB3BP	0.384794	3.46948	21.5519	0.0116728	all	1.33504
ITGB5	0.336251	3.89939	75.2494	0.00986342	all	1.31118
ITM2B	0.199734	2.57145	727.643	0.00410664	all	0.513606
ITPA	0.255481	3.42582	26.2032	0.00311225	all	0.875234
ITPKC	0.323501	3.92387	50.0803	0.00544537	all	1.26937
ITSN2	0.258972	5.05056	39.0367	0.00237579	all	1.30796
IWS1	0.196527	3.23621	44.5889	0.00214203	all	0.636002
JAGN1	0.221845	2.43253	121.91	0.00654487	all	0.539645
JAK1	0.299117	3.78405	84.6663	0.00285562	all	1.13187
JARID2	0.292915	4.82121	51.3206	0.00819142	all	1.4122
JKAMP	0.158403	1.87105	15.8907	0.00174152	all	0.29638
JMJD4	0.255512	3.69142	3.01811	0.0115481	all	0.943203
JMJD6	0.187409	2.31777	14.8652	0.00356679	all	0.434371
JOSD1	0.250848	2.7463	185.908	0.00243739	all	0.688904
JTB	0.279035	3.06403	153.299	0.00547998	all	0.85497
KANK1	0.329893	4.43031	31.884	0.00683296	all	1.46153
KANSL2	0.216837	3.74591	49.7655	0.00337825	all	0.812251
KANSL3	0.274999	5.25757	22.927	0.00572082	all	1.44583
KARS	0.168533	2.69016	89.2319	0.00371164	all	0.453382
KAT5	0.248696	4.00177	10.9765	0.0037176	all	0.995225
KAT7	0.335724	4.60449	17.5473	0.00239936	all	1.54584
KAT8	0.242303	4.21509	19.1816	0.00449657	all	1.02133
KATNA1	0.22614	2.60168	27.1208	0.00286896	all	0.588344
KATNBL1	0.271399	3.51862	21.8907	0.00378315	all	0.954951
KAZALD1	0.335662	3.53439	5.16625	0.0168486	all	1.18636
KBTBD2	0.26066	3.80399	114.992	0.00436221	all	0.991546
KBTBD4	0.252107	2.75214	8.14587	0.0064127	all	0.693833
KBTBD8	0.303659	3.34965	2.06414	0.0154579	all	1.01715
KCMF1	0.207426	2.73434	43.4122	0.00249031	all	0.567174
KCNC4	0.305308	3.49616	1.46315	0.0131328	all	1.06741
KCNK1	0.317601	3.37001	34.6437	0.0122555	all	1.07032
KCNK7	0.331732	3.86438	34.9921	0.0129475	all	1.28194
KCTD1	0.288696	4.06389	59.2912	0.00570421	all	1.17323
KCTD10	0.197477	2.10513	97.9937	0.00136876	all	0.415715
KCTD15	0.34348	4.6384	71.2334	0.00713804	all	1.59319
KCTD18	0.207451	2.51301	11.0358	0.00244227	all	0.521327
KCTD2	0.237356	3.50285	22.2641	0.00258271	all	0.831425
KCTD20	0.272315	3.66985	46.4447	0.00268471	all	0.999354
KCTD5	0.263523	4.07394	29.4849	0.00265071	all	1.07358
KCTD6	0.29667	3.67276	17.0277	0.00592982	all	1.0896
KCTD9	0.261348	3.06	32.1766	0.00326912	all	0.799724
KDELC2	0.256577	3.88131	32.968	0.00507283	all	0.995853
KDELR1	0.301306	4.68636	125.714	0.00216413	all	1.41203
KDELR2	0.20918	2.33137	94.3778	0.00328121	all	0.487675
KDM1A	0.226107	3.65941	29.4075	0.0024565	all	0.82742
KDM1B	0.202055	2.18342	13.2851	0.00264259	all	0.44117
KDM2A	0.273933	5.46404	25.166	0.00413848	all	1.49678
KDM2B	0.281656	3.50851	19.2933	0.00245336	all	0.988191
KDM4D	0.326378	3.98942	0.490817	0.0126863	all	1.30206
KDM8	0.294317	3.16815	2.34191	0.0120748	all	0.932441
KDSR	0.2048	2.52116	32.4682	0.00232059	all	0.516331
KEAP1	0.31303	5.01026	56.8977	0.00312027	all	1.56836
KHDRBS1	0.305265	3.41023	74.9731	0.00248106	all	1.04102
KHNYN	0.203228	3.03578	36.1961	0.00301788	all	0.616955
KIAA0020	0.293086	3.47404	32.1016	0.00664121	all	1.01819
KIAA0100	0.211061	3.13356	39.1873	0.00246512	all	0.661372
KIAA0141	0.239211	3.73944	27.5621	0.00419894	all	0.894517
KIAA0196	0.214223	2.94613	28.2872	0.00231965	all	0.63113
KIAA0247	0.359235	4.51235	34.2331	0.00475039	all	1.62099
KIAA0319L	0.229395	5.32769	21.3343	0.00467065	all	1.22215
KIAA0355	0.223819	4.46584	12.9117	0.00381099	all	0.999541
KIAA0556	0.259399	6.15319	6.55797	0.00630796	all	1.59613
KIAA0930	0.330695	3.65801	300.294	0.00749021	all	1.20968
KIAA1191	0.241309	2.35255	45.1656	0.00410731	all	0.567693
KIAA1217	0.307609	4.66369	20.3257	0.00472061	all	1.43459
KIAA1279	0.206047	2.44687	20.0793	0.00328367	all	0.50417
KIAA1430	0.273644	3.65998	33.1672	0.00262283	all	1.00153
KIAA1598	0.245764	4.29098	54.9346	0.00479507	all	1.05457
KIAA1737	0.305169	4.48859	109.992	0.00591478	all	1.36978
KIAA1967	0.31015	4.08696	16.6718	0.0043326	all	1.26757
KIAA2013	0.320324	4.68965	29.6722	0.00397134	all	1.50221
KIF1C	0.324235	3.44943	59.028	0.00652504	all	1.11843
KIF2A	0.251414	4.38639	29.2156	0.0048526	all	1.1028
KIF3B	0.282834	5.58673	62.294	0.00631659	all	1.58012
KIF5B	0.301849	4.55404	109.525	0.00503767	all	1.37464
KIF9	0.24703	2.58114	3.64023	0.0108095	all	0.637619
KIFAP3	0.315872	4.24537	26.7886	0.00468465	all	1.34099
KLF10	0.315542	3.08673	81.0649	0.00798746	all	0.973993
KLF11	0.328029	4.36657	19.9986	0.00964379	all	1.43236
KLF3	0.231827	3.38461	72.5753	0.00338041	all	0.784644
KLF5	0.319966	4.38537	327.667	0.00915109	all	1.40317
KLF6	0.348227	3.86908	110.966	0.0116039	all	1.34732
KLHDC10	0.280774	5.39959	18.3419	0.00447604	all	1.51606
KLHDC2	0.327373	3.85966	43.4241	0.00493094	all	1.26355
KLHDC3	0.330134	4.40698	41.051	0.00536078	all	1.45489
KLHDC4	0.253657	3.53684	5.51505	0.006708	all	0.897143
KLHL12	0.289641	4.14117	31.5073	0.00434549	all	1.19945
KLHL18	0.277706	3.56814	21.2128	0.00577822	all	0.990895
KLHL2	0.299757	3.32125	7.82426	0.00658702	all	0.995568
KLHL22	0.323574	4.26695	10.2103	0.0107109	all	1.38067
KLHL25	0.269188	2.82494	11.2687	0.00570483	all	0.760439
KLHL36	0.282484	5.73202	14.2284	0.00596042	all	1.6192
KLHL42	0.279682	5.20458	55.9067	0.0050331	all	1.45562
KLHL7	0.24572	3.04874	14.806	0.00373639	all	0.749135
KLLN	0.31555	3.78981	0.639023	0.0134298	all	1.19587
KNOP1	0.249484	3.9971	4.45941	0.005623	all	0.997213
KNSTRN	0.333754	3.79979	15.4303	0.0168654	all	1.2682
KPNA1	0.19589	2.88134	111.672	0.00207592	all	0.564427
KPNA3	0.199668	2.30964	32.6406	0.00219827	all	0.461161
KPNA4	0.204762	2.65632	24.3036	0.00205887	all	0.543912
KPNA6	0.21288	3.97964	89.3515	0.00301234	all	0.847186
KPNB1	0.226422	3.42676	63.8338	0.00329679	all	0.775894
KRAS	0.209923	3.18933	47.6817	0.00228667	all	0.669515
KRBOX4	0.3277	4.84731	8.34761	0.0122501	all	1.58846
KRCC1	0.27987	3.6373	35.6088	0.00870711	all	1.01797
KRI1	0.335819	4.39124	22.2049	0.00452945	all	1.47466
KRR1	0.299144	3.49297	14.2138	0.00332947	all	1.0449
KRT222	0.348449	4.04698	1.46725	0.0147272	all	1.41016
KRT23	0.361314	4.04769	91.6255	0.0162954	all	1.46249
KRTCAP2	0.316737	3.33539	155.051	0.00741326	all	1.05644
KRTDAP	0.288471	3.15468	3651.84	0.0111588	all	0.910033
KTI12	0.226794	2.92954	7.53919	0.00522315	all	0.664403
KTN1-AS1	0.386217	3.86606	1.87995	0.01685	all	1.49314
KXD1	0.268559	3.37873	28.0301	0.00259262	all	0.90739
L3MBTL2	0.273336	3.77057	13.0808	0.00491212	all	1.03063
LACTB	0.212376	2.29308	16.0955	0.00333517	all	0.486994
LACTB2	0.341425	3.81452	7.71901	0.0236228	all	1.30237
LAMP2	0.192397	2.44717	267.992	0.00205735	all	0.47083
LAMTOR1	0.300976	4.18198	146.413	0.00532423	all	1.25868
LAMTOR2	0.278868	2.9183	52.642	0.00950341	all	0.813821
LAMTOR3	0.217995	2.17817	45.2984	0.00404574	all	0.47483
LAMTOR4	0.291952	3.70419	62.9281	0.0123734	all	1.08144
LAMTOR5	0.272764	3.45611	38.0532	0.00770747	all	0.942701
LANCL1	0.281392	3.45487	210.032	0.00732807	all	0.972176
LANCL2	0.272436	2.87726	31.6536	0.00460367	all	0.783869
LAP3	0.392566	3.93361	63.5242	0.0101816	all	1.5442
LAPTM4A	0.1993	1.98331	306.53	0.00336341	all	0.395273
LAPTM4B	0.345947	3.74988	227.776	0.00792075	all	1.29726
LARP1	0.349911	4.27997	73.0839	0.00545247	all	1.49761
LARP4	0.255715	4.26352	24.095	0.00405122	all	1.09025
LARP4B	0.219599	3.84919	36.6858	0.00335711	all	0.845277
LARP7	0.259058	4.00361	23.2275	0.0057827	all	1.03717
LARS	0.289184	4.40965	45.9247	0.00569665	all	1.2752
LARS2	0.298338	4.33162	5.63739	0.00703288	all	1.29228
LAS1L	0.212091	2.4229	27.8427	0.00221257	all	0.513875
LAT2	0.360013	4.01838	7.51127	0.0205171	all	1.44667
LCLAT1	0.278278	4.90552	26.5803	0.00671573	all	1.3651
LCMT1	0.144899	1.61075	29.5309	0.0021312	all	0.233395
LCMT2	0.217903	2.88301	14.7652	0.00511336	all	0.628219
LDHA	0.341112	3.73252	595.214	0.00863253	all	1.27321
LDHB	0.327427	3.27679	169.718	0.0109181	all	1.07291
LDLRAD3	0.205393	3.44202	12.5377	0.00230035	all	0.706967
LEMD2	0.252727	3.92471	34.9464	0.00282679	all	0.99188
LENG1	0.257932	2.76779	6.13819	0.00928969	all	0.713901
LEO1	0.236073	3.40136	30.67	0.00341435	all	0.802967
LEPRE1	0.349493	3.9873	8.86858	0.00808551	all	1.39353
LEPROT	0.135661	1.6239	281.261	0.0016588	all	0.2203
LEPROTL1	0.199264	2.35547	73.9704	0.0027079	all	0.46936
LETM1	0.351853	4.46273	29.3694	0.00654922	all	1.57022
LGALS3	0.29567	3.79416	293.728	0.0056395	all	1.12182
LHPP	0.327481	4.27739	5.35567	0.00774954	all	1.40076
LIAS	0.291394	2.68141	10.2115	0.00992379	all	0.781349
LIG3	0.307056	5.11541	22.6064	0.00422973	all	1.57072
LIG4	0.279897	5.6163	10.6401	0.00749229	all	1.57199
LIMA1	0.303285	3.36333	179.298	0.008726	all	1.02005
LIMK2	0.274728	3.86448	68.465	0.00295196	all	1.06168
LIMS1	0.269195	2.61696	20.3634	0.00580554	all	0.70447
LIMS2	0.340868	4.6897	6.24781	0.0170017	all	1.59857
LIN7B	0.329274	4.83479	8.60723	0.0169729	all	1.59197
LINC00094	0.298233	3.45645	18.3242	0.00694483	all	1.03083
LINC00339	0.285259	4.70055	17.7652	0.0134709	all	1.34088
LINC00493	0.261079	2.7929	62.1001	0.0115788	all	0.729167
LINC00847	0.364908	3.33888	10.694	0.0178612	all	1.21838
LINC00863	0.318721	4.39217	5.46332	0.0100839	all	1.39988
LINS	0.280002	4.20192	9.32821	0.00388917	all	1.17655
LIPA	0.257363	2.75956	44.4502	0.00445595	all	0.710209
LITAF	0.3739	4.34339	375.205	0.0206276	all	1.62399
LIX1L	0.366236	4.22488	7.45076	0.0200532	all	1.5473
LL22NC03-80A10.6	0.18352	2.04866	19.2515	0.003621	all	0.375971
LLGL2	0.341318	4.67178	35.4447	0.00464756	all	1.59456
LLPH	0.223043	2.79147	15.2874	0.00605709	all	0.622619
LMAN1	0.21646	2.84123	51.7992	0.0025876	all	0.615014
LMAN2	0.224672	2.49711	137.18	0.00367597	all	0.561029
LMAN2L	0.229849	2.61348	13.148	0.0046258	all	0.600705
LMBR1	0.287246	3.19401	24.6412	0.00211684	all	0.917468
LMBR1L	0.239868	3.6462	25.5747	0.00368926	all	0.874607
LMBRD1	0.308653	3.53848	46.0036	0.00416849	all	1.09216
LMF1	0.336746	4.31045	5.73752	0.00807742	all	1.45153
LMO2	0.310042	2.91517	12.0826	0.0113706	all	0.903828
LNX2	0.325561	4.5939	14.1472	0.00541758	all	1.49559
LOH12CR1	0.303158	3.46622	10.1477	0.0129246	all	1.05081
LPAR3	0.322839	4.84705	39.8348	0.0175392	all	1.56482
LPCAT2	0.34103	4.36127	9.13927	0.00825482	all	1.48732
LPGAT1	0.301969	4.12299	96.819	0.00760461	all	1.24502
LPHN2	0.282299	4.51738	9.89499	0.00692181	all	1.27525
LPIN2	0.322473	4.62663	9.40239	0.0113935	all	1.49196
LPP-AS2	0.338696	4.14123	1.12029	0.0141315	all	1.40262
LRIF1	0.301284	3.5439	13.2586	0.00748066	all	1.06772
LRP11	0.230342	2.81516	74.5428	0.00375711	all	0.64845
LRPAP1	0.279871	3.55408	78.8641	0.00473459	all	0.994685
LRPPRC	0.278344	4.62631	48.8066	0.00697236	all	1.2877
LRR1	0.348652	3.71336	7.67946	0.0132859	all	1.29467
LRRC1	0.267791	4.74187	22.5776	0.00591483	all	1.26983
LRRC23	0.325142	3.33165	4.52082	0.0149526	all	1.08326
LRRC28	0.341204	3.22022	10.6803	0.00433591	all	1.09875
LRRC40	0.311988	4.03426	14.9127	0.00433351	all	1.25864
LRRC41	0.215968	2.60819	18.8386	0.00123261	all	0.563286
[truncated: 2,646 more rows]
